# Supplementary material
Source: PubMed Central journal article supplement (PMC5984497)
Supplement: pnas.1718603115.sapp.pdf [file pnas.1718603115.sapp.pdf]

## Supplementary Information for

### **Chemokine *ccl33* is a key regulator of teleost fish barbel development**

Tao Zhou, Ning Li, Yulin Jin, Qifan Zeng, Wendy Prabowo, Yang Liu, Changxu Tian, Lisui Bao, Shikai Liu, Zihao Yuan, Qiang Fu, Sen Gao, Dongya Gao, Rex Dunham, Neil H. Shubin, and Zhanjiang Liu

Corresponding author: Neil H. Shubin, and Zhanjiang Liu  
Email: johnliu@syr.edu (Z.L.), and neil.shubin@gmail.com (N.S.)

#### **This PDF file includes:**

Figs. S1 to S5  
Tables S1 to S8  
References for SI reference citations

#### **Other supplementary materials for this manuscript include the following:**

Datasets S1 to S2

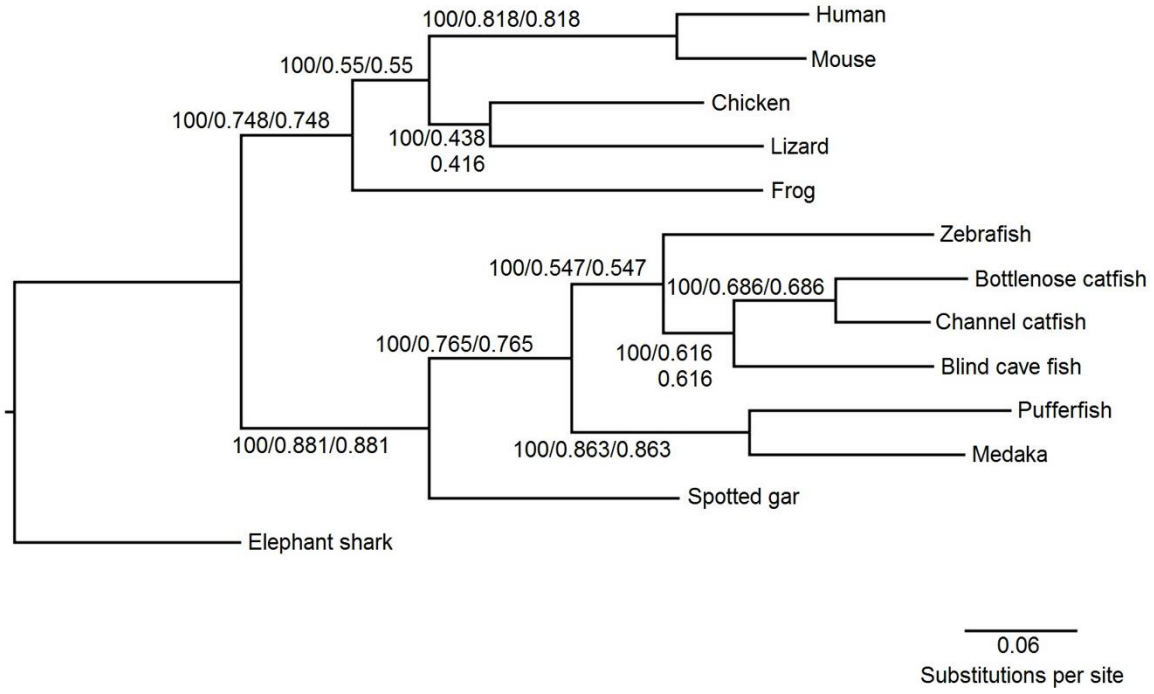

**Fig. S1. Phylogenetic tree from bottlenose catfish and 12 representative species.**

**A: Channel catfish**

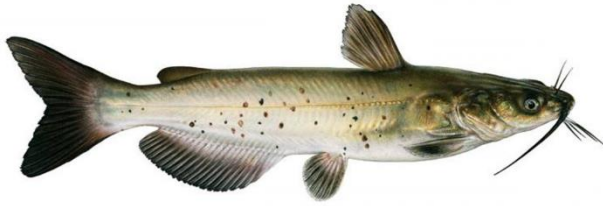

**B: Bottlenose catfish**

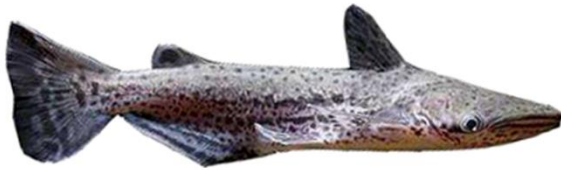

**C: Details of ossified barbel of Bottlenose catfish**

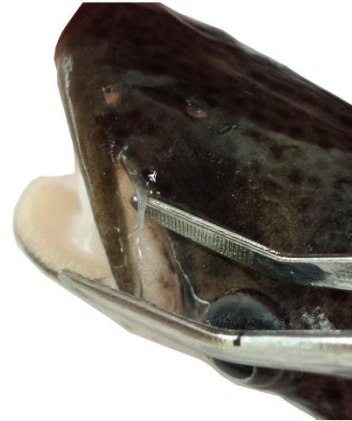

**Fig. S2. Barbel features of channel catfish and bottlenose catfish.**

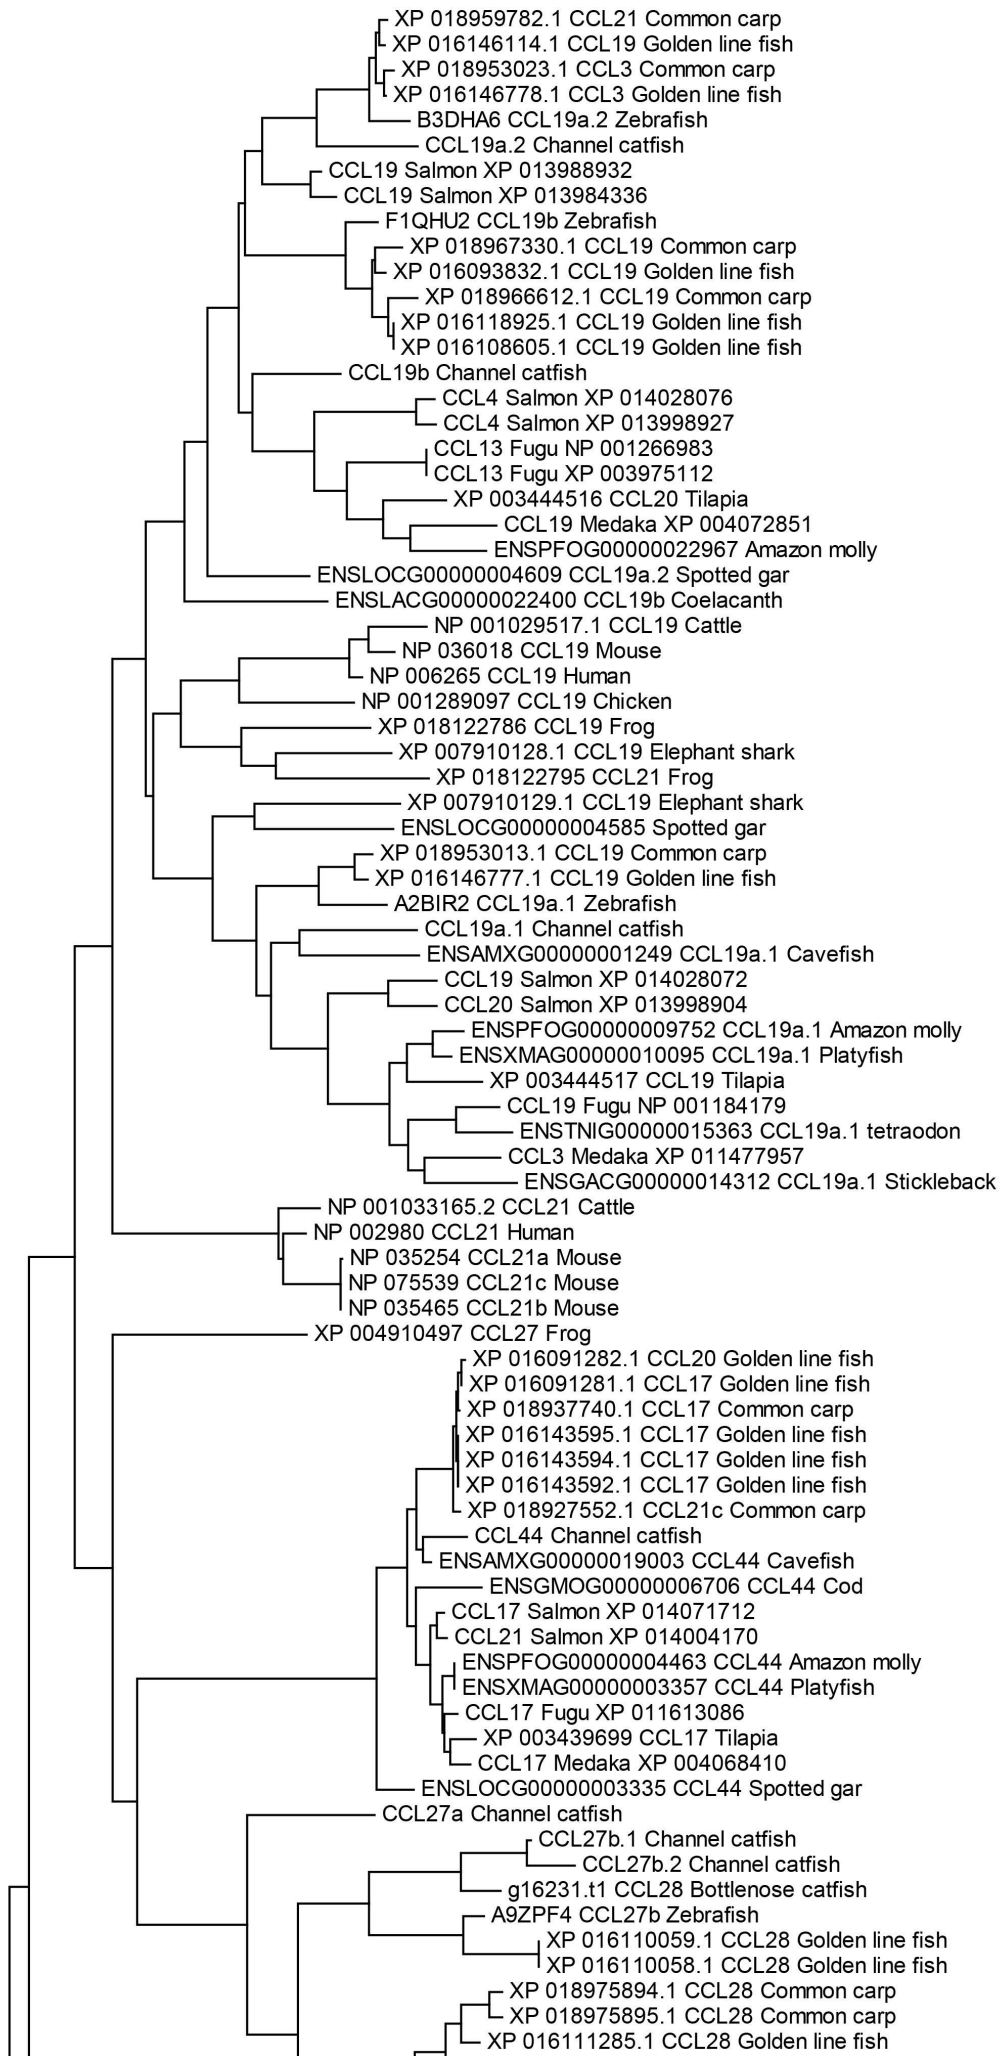

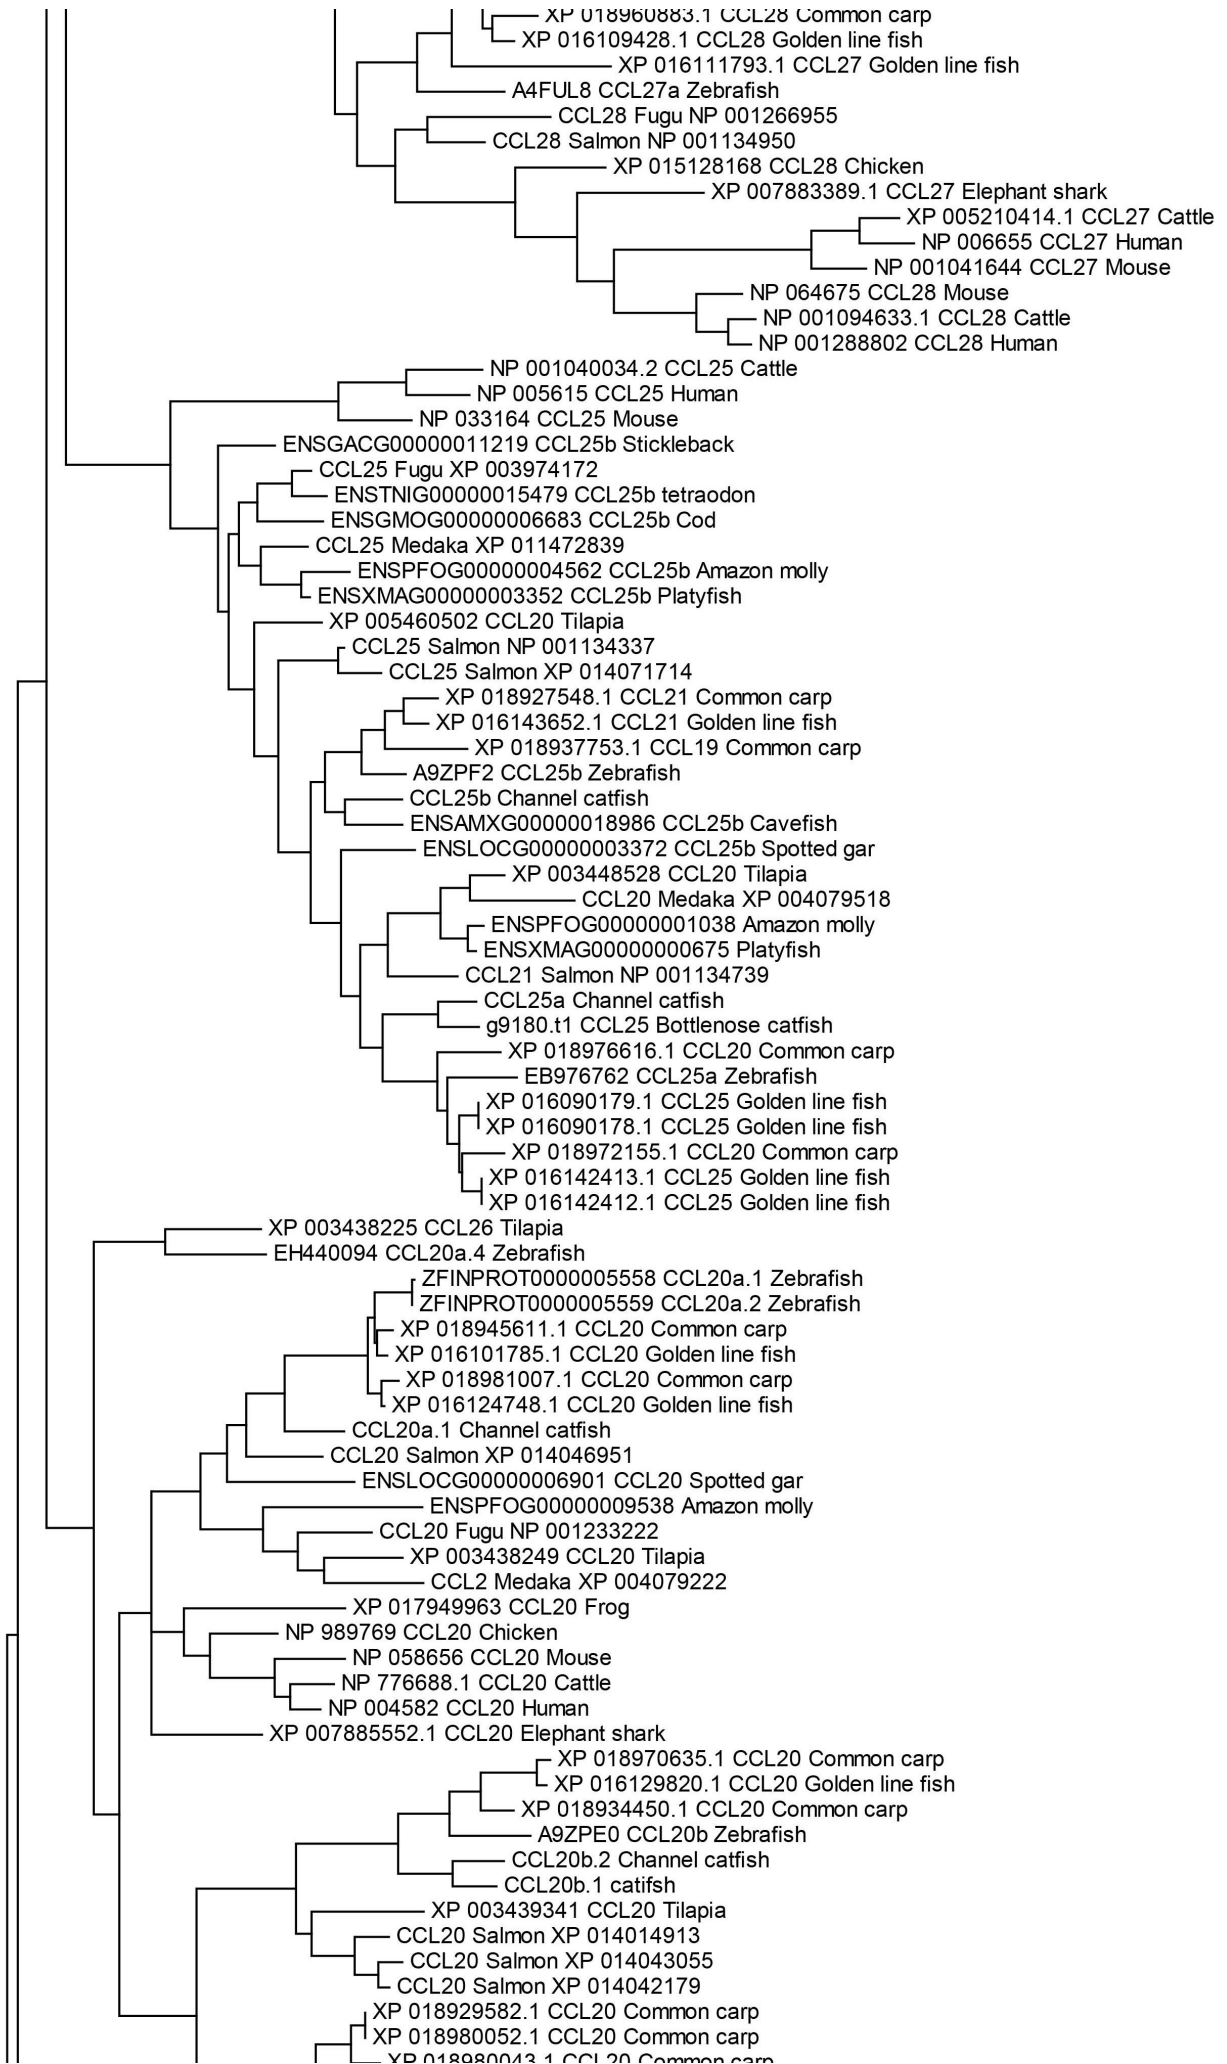

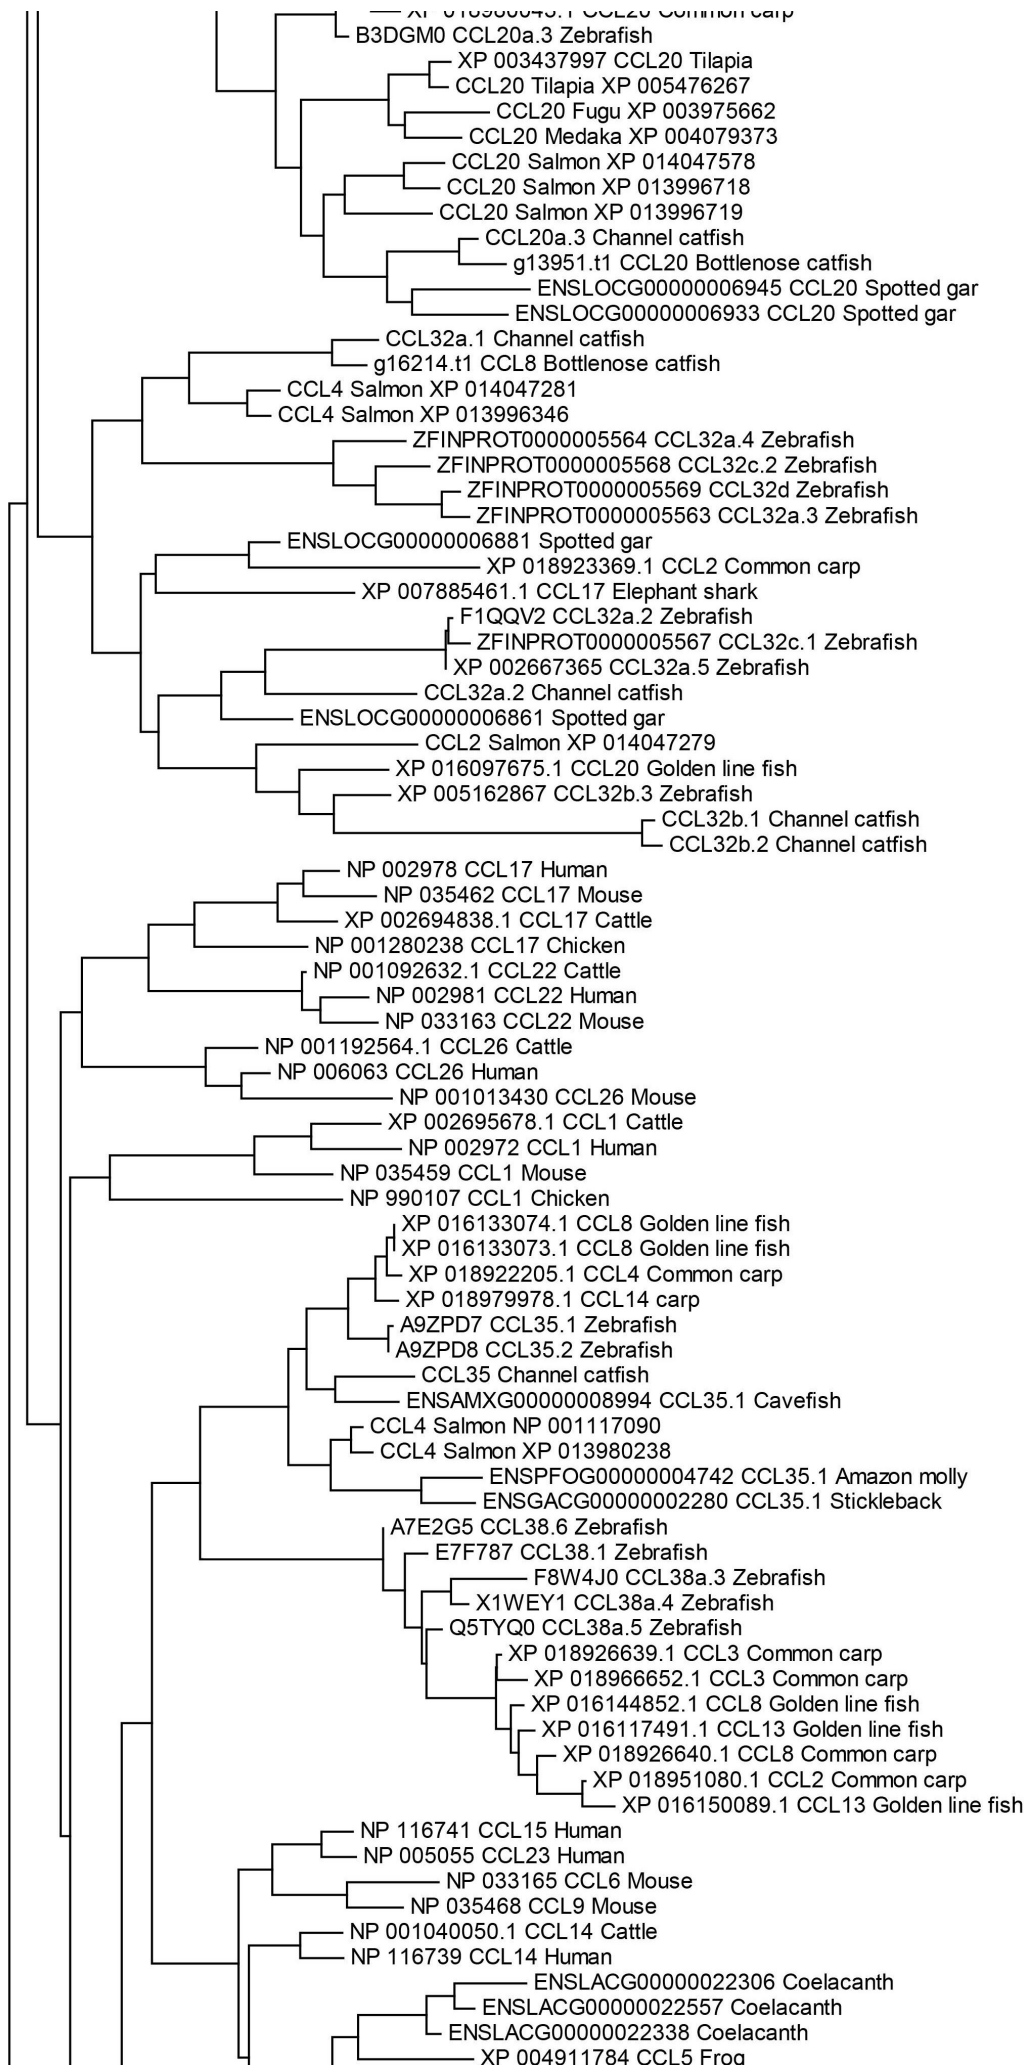

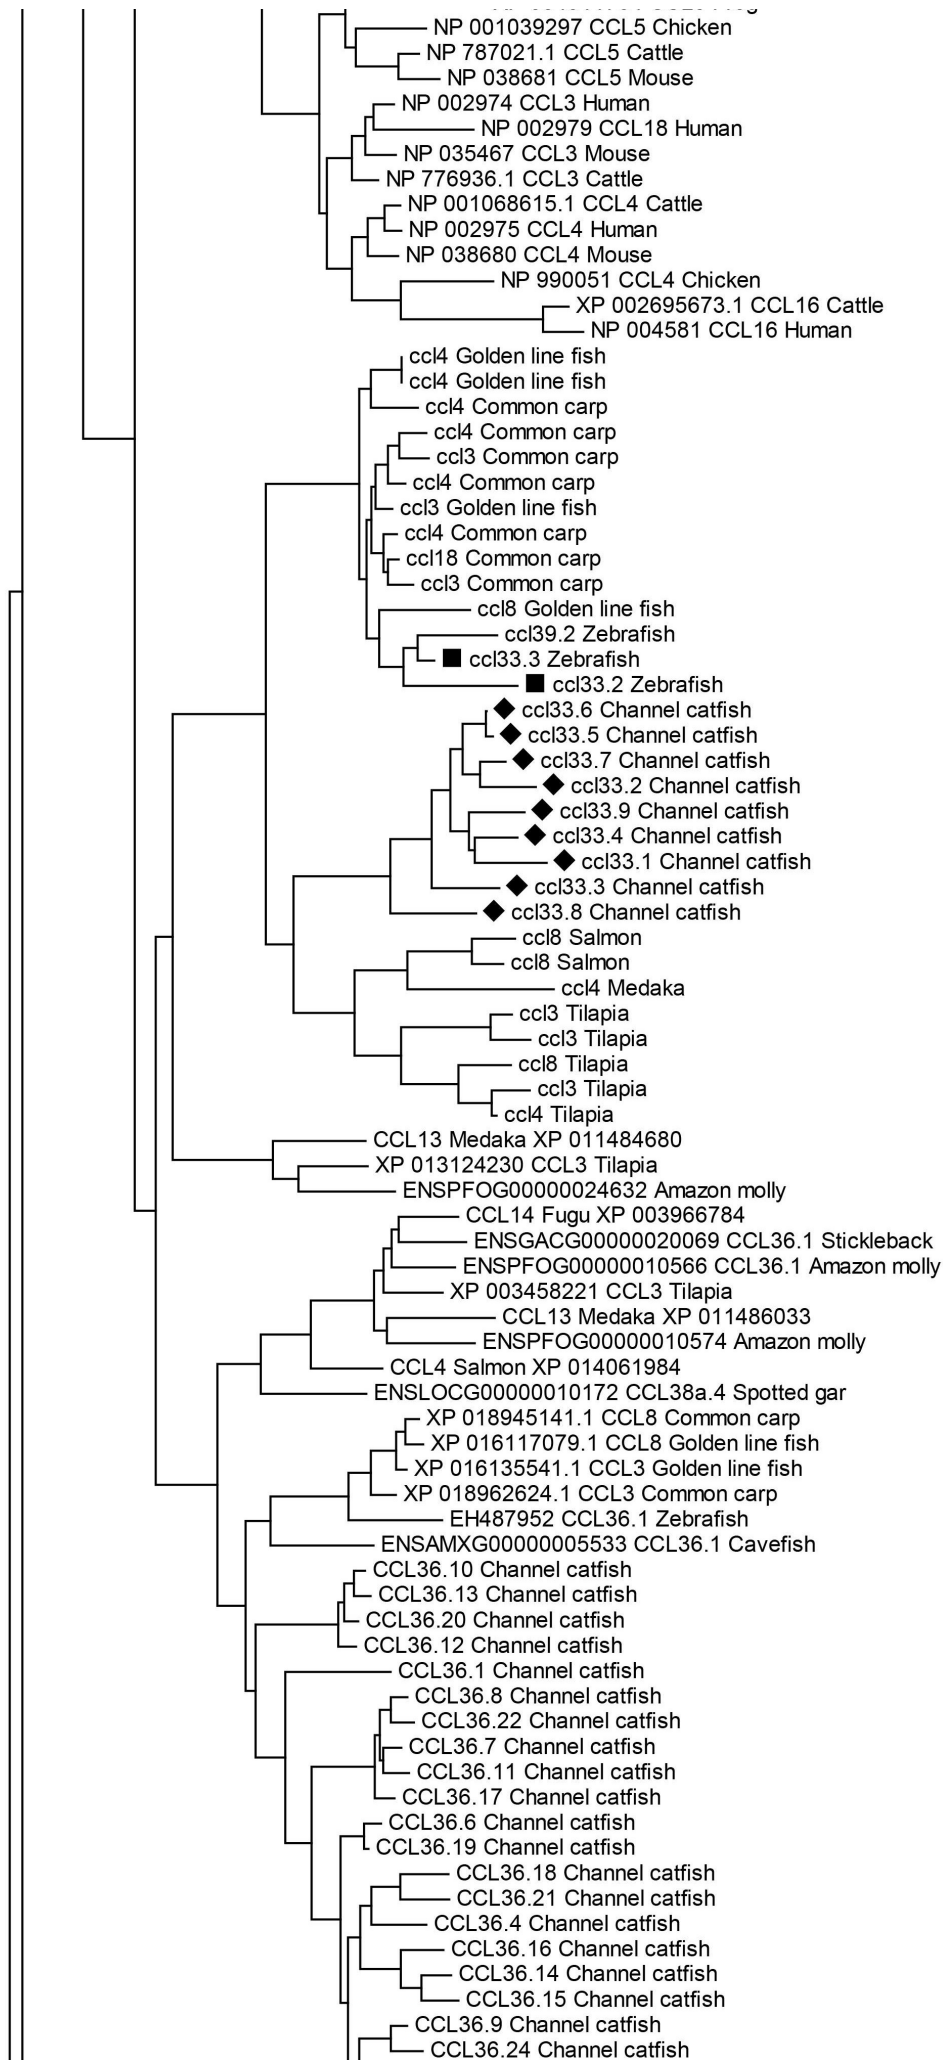

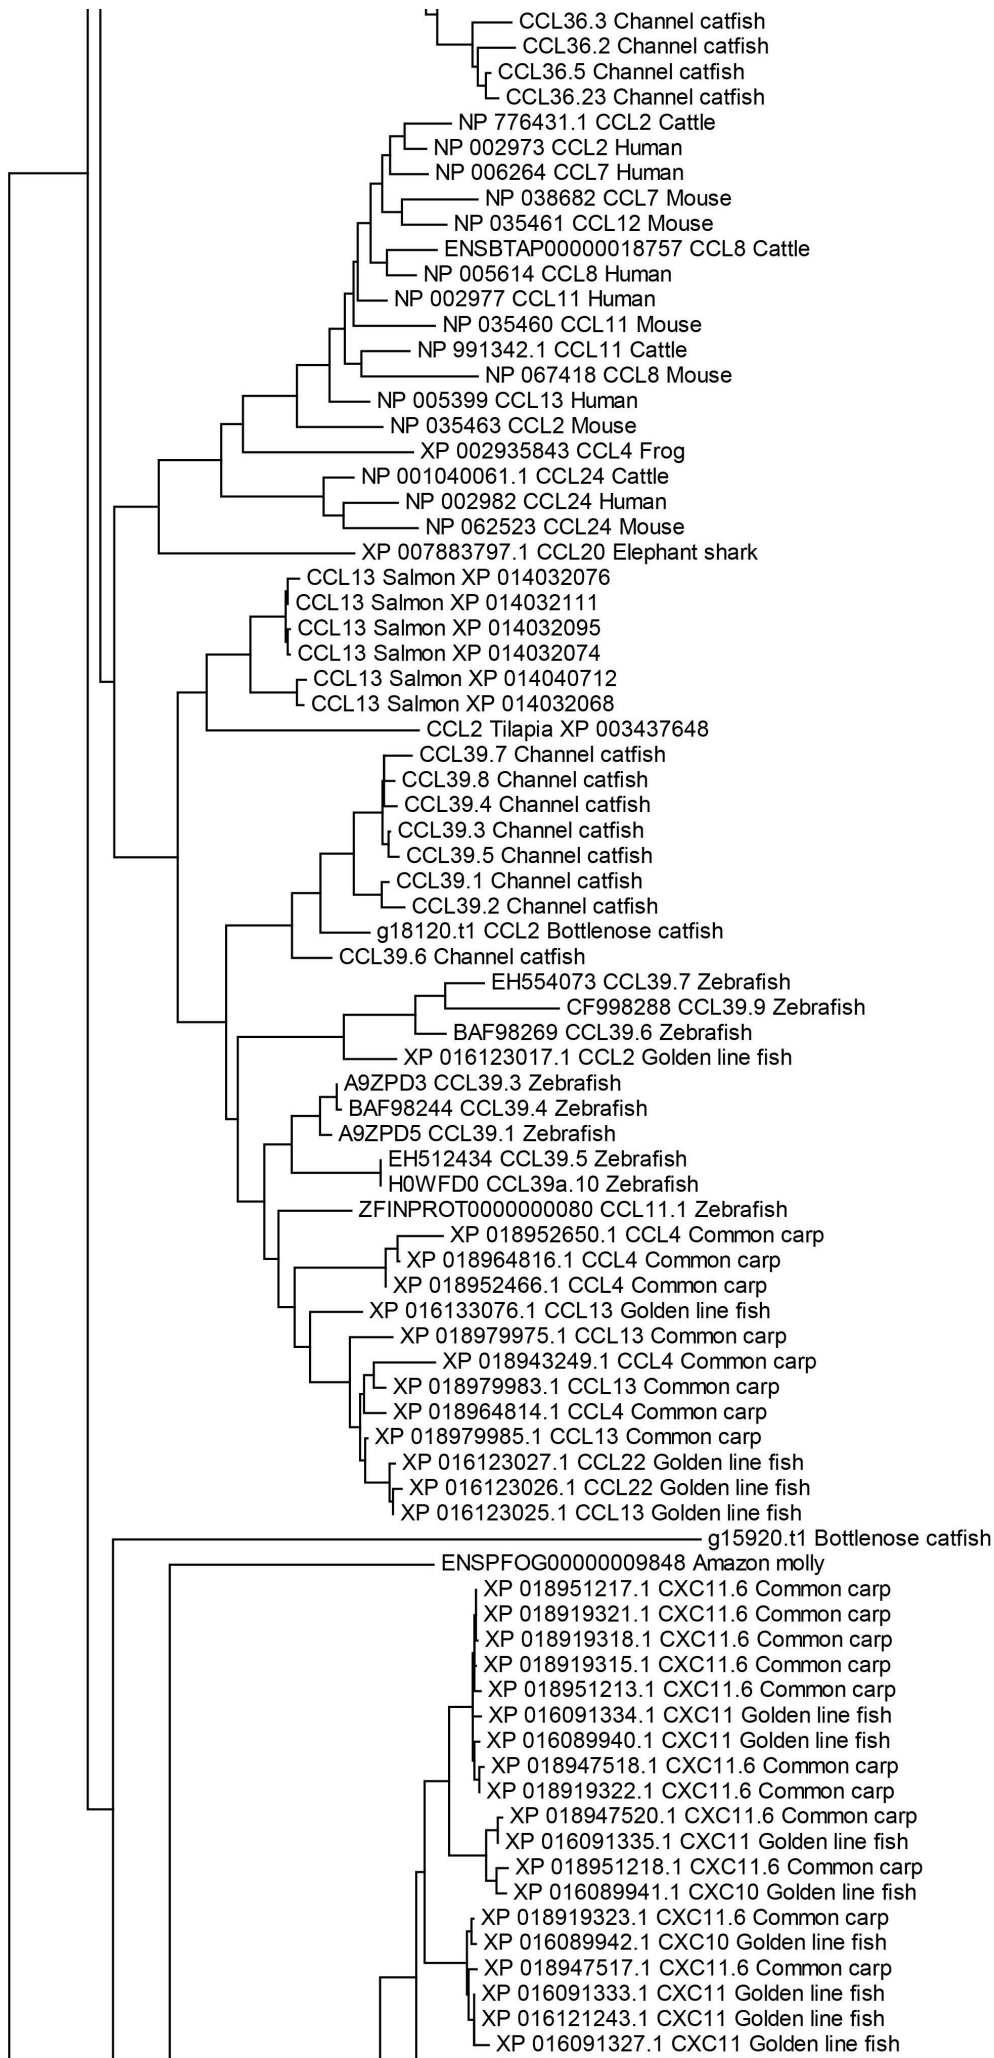



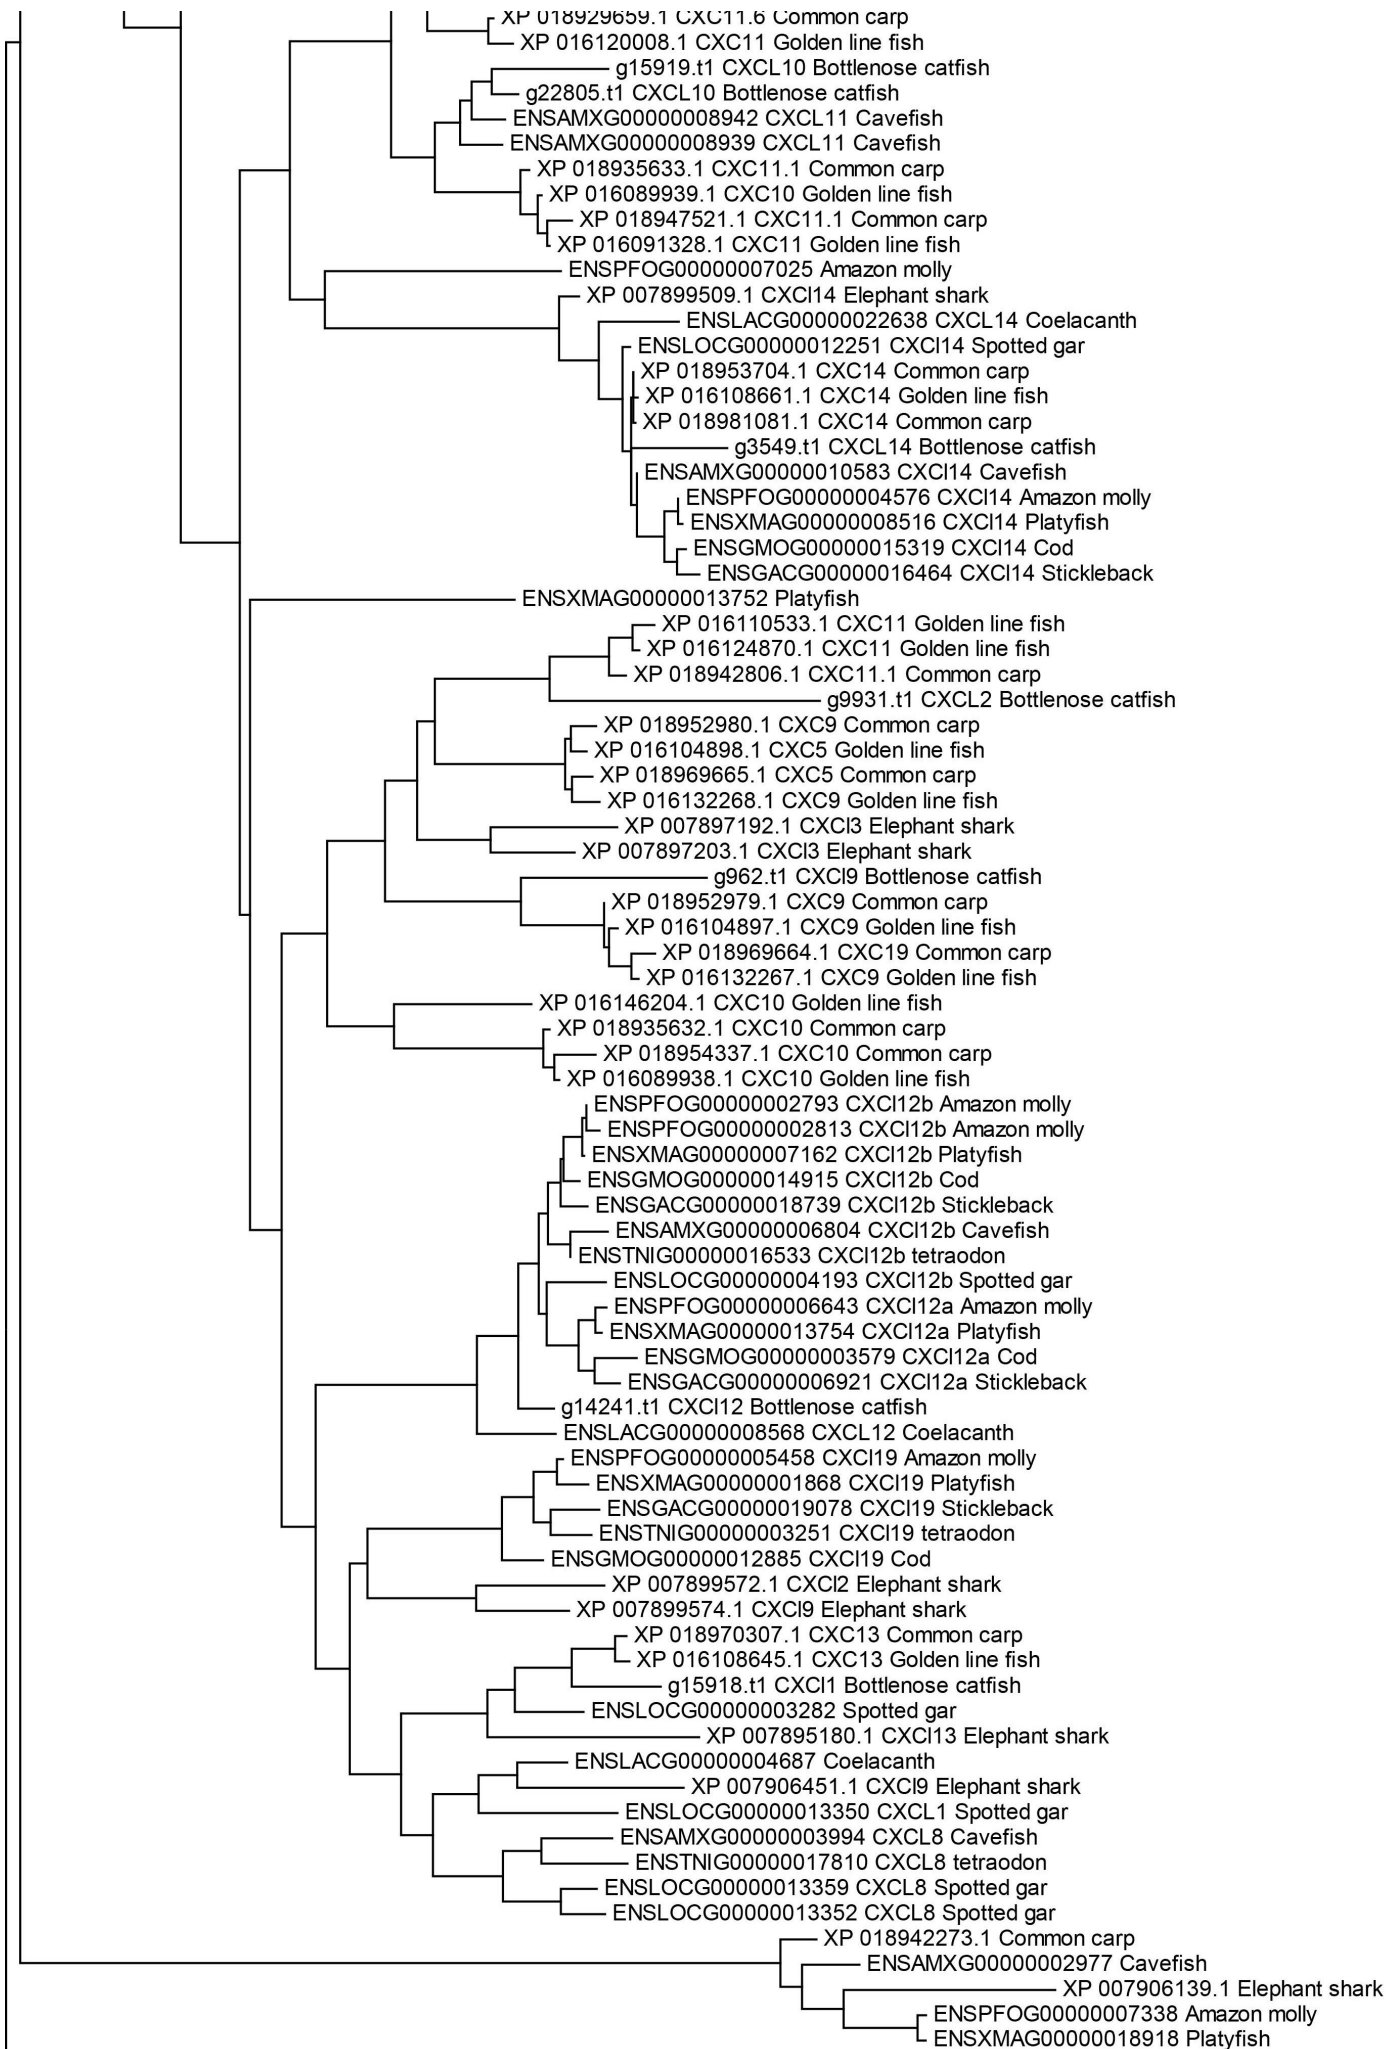

— CCI 34.1 Channel catfish

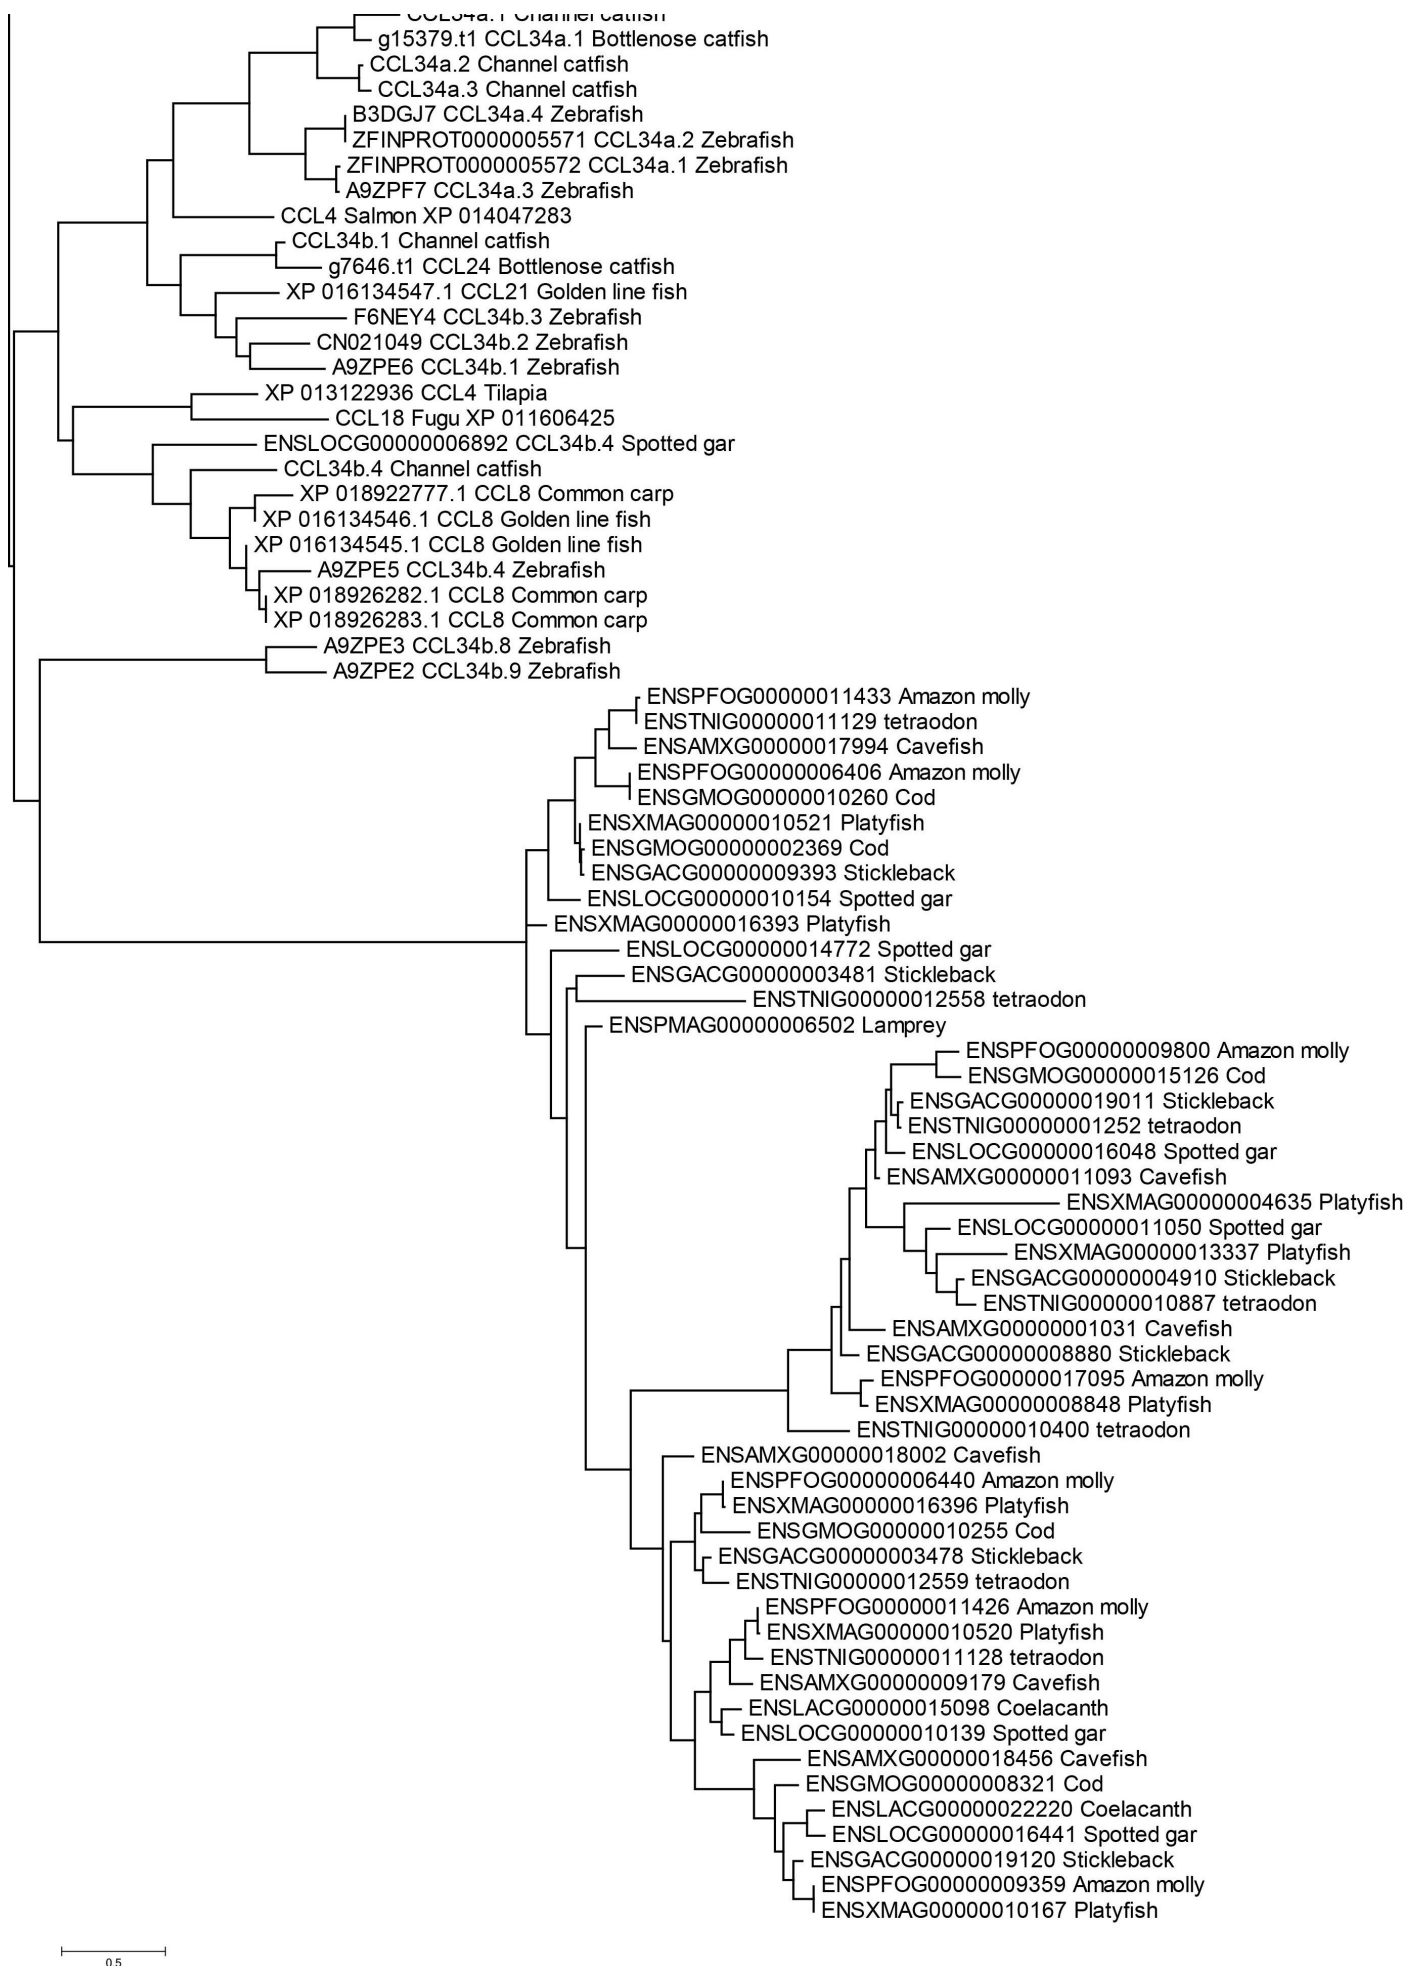

**Fig. S3. Phylogenetic analysis of CC and CXC chemokine ligands from different species.**

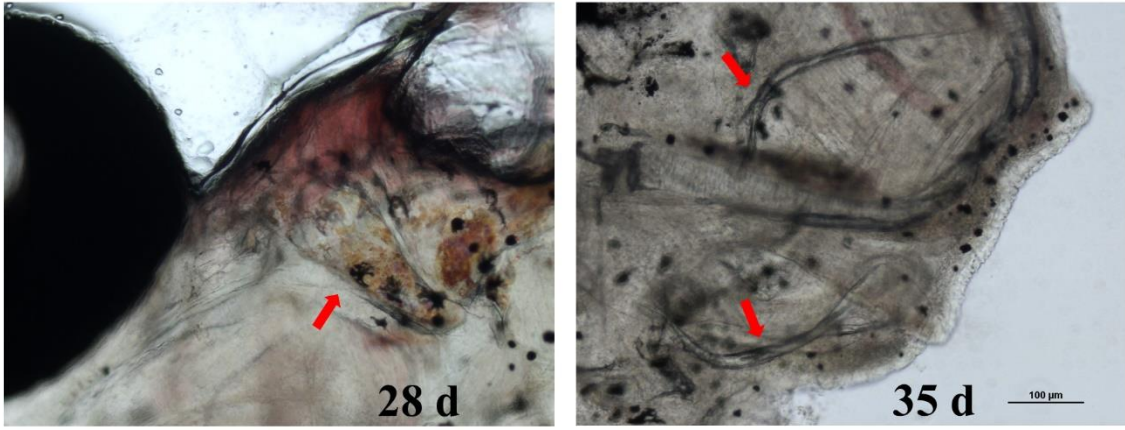

**Fig. S4. Early barbel morphology of zebrafish. The red arrow indicates the barbel bud.**

### (A) CCL33.2

Wild type

AAGG**TGGTGGTTTTGGCTCTCGTGG**TGATGG**CGGTGGTGGCAGGGGCAAGGG**TAGTTGTGGT**GGACATCCATGGGCAGGGCGG**ACTGCTCA

Mutant, Phenotype: Short barbel, Genotype: 2 bp substitution

AA**AGGGTGGTTTTGGCTCTCGTGG**TGATGG**CGGTGGTGGCAGGGGCAAGGG**TAGTTGTGGT**GGACATCCATGGGCAGGGCGG**ACTGCTCA

Mutant, Phenotype: Loss barbel, Genotype: 2 bp insertion

AAGG**TGGTGGTTTTGGCTCTCGT****AGG**TGATGG**CGGTGGTGGCAGGGGCAAGGG**TAGTTGTGGT**GGACT****TATCCATGGGCAGGGCGG**ACTGCTCA

### (B) CCL33.3

Wild type

TT**CCCGAACCCGTGTGCTTCAAT**TTCATTGACTTT**CCAATCCCAGCCAACAAAG**TAGTGAGTGCCGTGAGAACAGT**TTCACGCTGTGCTGTTAAAGGCATTGT**

Mutant, Phenotype: Curly barbel, Genotype: 5 bp deletion

TT**CCCGAACCCGTGT**-----**T**----**ATTCATTGACTTTCCAATCCCAGCCAACAAAG**TAGTGAGTGCCGTGAGAACAGT**TTCACGCTGTGCTGTTAAAGGCATTGT**

Mutant, Phenotype: Short barbel, Genotype: 7 bp deletion

TT**CCCGAACCCGTGT**-----**C--ATTT**----**TTGACTTTCCAATCCCAGCCAACAAAG**TAGTGAGTGCCGTGAGAACAGG**TTCACGCTGTGCTGTTAAAGGCATTGT**

Mutant, Phenotype: Loss barbel, Genotype: 3 bp deletion, 3 bp substitution

TT**CCCGAACCCGTGT**-----**TCAAT**TTCATTGACTTT**CCAATCCCAGCCAACAAA****AT**AGTGAGTGCCGTGA**AAACAGGTTCACGCTGTGATGTTAAAGGCATTGT**

**Red**, gRNA target sequence (plus strand); **Purple**, gRNA target sequence (minus strand); **Orange**, substitution; **Green**, insertion; --, deletion

Fig. S5. List of genotypes of *ccl33* mutants.

**Table S1. GO terms that significantly enriched during barbel regeneration of channel catfish.**

| Time point | GO biological process                            | Fold Enrichment | <i>P</i> value |
|------------|--------------------------------------------------|-----------------|----------------|
| 1d         | GO:0045333 cellular respiration                  | 3.59            | 0.003          |
|            | GO:0042060 wound healing                         | 2.57            | 0.03           |
|            | GO:0009611 response to wounding                  | 2.51            | 0.01           |
| 2d         | GO:0032502 developmental process                 | 1.49            | 0.0006         |
|            | GO:0007275 multicellular organism development    | 1.49            | 0.003          |
|            | GO:0044767 single-organism developmental process | 1.48            | 0.001          |
| 3d         | GO:0048856 anatomical structure development      | 2.04            | 0.005          |
|            | GO:0048568 embryonic organ development           | 1.79            | 0.001          |
| 7d         | GO:0007155 cell adhesion                         | 2.21            | 0.026          |
|            | GO:0022610 biological adhesion                   | 2.2             | 0.028          |
|            | GO:0032502 developmental process                 | 1.36            | 0.037          |
| 14d        | GO:0007155 cell adhesion                         | 2.64            | 0.00019        |
|            | GO:0022610 biological adhesion                   | 2.63            | 0.0002         |
|            | GO:0044699 single-organism process               | 1.22            | 0.007          |

**Table S2. Genes specific in channel catfish and were differentially expressed during barbel regeneration of channel catfish.**

| Gene ID   | Name         | Length |
|-----------|--------------|--------|
| 804886    | ND6          | 171    |
| 108263381 | pdss2        | 381    |
| 108266750 | tex30        | 265    |
| 108263386 | kmo          | 473    |
| 108270394 | crls1        | 378    |
| 108266931 | LOC108266931 | 197    |
| 100528215 | emc4         | 187    |
| 108255681 | LOC108255681 | 204    |
| 108263202 | apopt1       | 198    |
| 108257472 | edn1         | 195    |
| 108279850 | LOC108279850 | 222    |
| 108275545 | haus8        | 364    |
| 100528430 | anapc13      | 74     |
| 108272348 | cks1b        | 79     |
| 108276169 | cenpw        | 75     |
| 100528304 | ebag9        | 212    |
| 108266359 | LOC108266359 | 332    |
| 108268882 | tmsb15b      | 46     |
| 108257184 | cap2         | 389    |
| 108268648 | fanca        | 1141   |
| 108274164 | bricd5       | 228    |
| 100528677 | pdc5         | 126    |
| 108271425 | tax1bp3      | 125    |
| 108262879 | LOC108262879 | 329    |
| 108270530 | LOC108270530 | 228    |
| 108280749 | LOC108280749 | 510    |
| 804882    | ND4          | 460    |
| 108258791 | cytl1        | 192    |
| 108268228 | ssx2ip       | 501    |
| 108270589 | LOC108270589 | 463    |
| 100304887 | cript        | 101    |
| 100528363 | gins3        | 211    |
| 100528639 | skp1         | 163    |
| 108279644 | orc5         | 445    |
| 108264799 | LOC108264799 | 383    |
| 108270120 | LOC108270120 | 127    |
| 108274859 | LOC108274859 | 226    |
| 108265590 | epgn         | 153    |
| 108266789 | LOC108266789 | 132    |
| 108262226 | LOC108262226 | 186    |
| 108271379 | slc39a3      | 315    |
| 108273999 | ccser2       | 791    |
| 108271223 | cep19        | 160    |
| 100528704 | mzt1         | 75     |
| 108268687 | LOC108268687 | 241    |
| 108272622 | dctn3        | 185    |
| 108255763 | LOC108255763 | 2337   |

|           |              |     |
|-----------|--------------|-----|
| 108271519 | snrpc        | 159 |
| 108261049 | LOC108261049 | 163 |
| 108270478 | cf12         | 166 |
| 108255701 | LOC108255701 | 108 |
| 108271021 | LOC108271021 | 119 |
| 108274856 | LOC108274856 | 231 |
| 108259812 | cchr1        | 692 |
| 108264363 | tsnaxip1     | 548 |
| 100304584 | LOC100304584 | 105 |
| 108280863 | twsg1        | 223 |
| 108257874 | atraid       | 230 |
| 108281088 | LOC108281088 | 130 |
| 108260511 | slc9b2       | 533 |
| 108268439 | LOC108268439 | 78  |
| 108272615 | pex11b       | 252 |
| 108256728 | LOC108256728 | 157 |
| 108266662 | dcaf17       | 529 |
| 108276694 | prr11        | 299 |
| 108256526 | polr1d       | 172 |
| 108268918 | LOC108268918 | 115 |
| 108259227 | cklf         | 143 |
| 108258502 | p1d6         | 243 |
| 108256594 | LOC108256594 | 83  |
| 108273111 | ten1         | 126 |
| 108272082 | LOC108272082 | 75  |
| 108260508 | LOC108260508 | 170 |
| 108255648 | LOC108255648 | 232 |
| 108265132 | c1h8orf59    | 98  |
| 100304470 | b2m          | 116 |
| 100305060 | LOC100305060 | 78  |
| 100528356 | brk1         | 75  |
| 108255519 | LOC108255519 | 110 |
| 108260858 | LOC108260858 | 231 |
| 108261098 | LOC108261098 | 226 |
| 108269115 | LOC108269115 | 86  |
| 100304587 | LOC100304587 | 92  |
| 100304595 | LOC100304595 | 119 |
| 100528727 | arpc4        | 168 |
| 100529001 | psmf1        | 270 |
| 108254817 | LOC108254817 | 239 |
| 108255518 | LOC108255518 | 112 |
| 108256245 | LOC108256245 | 111 |
| 108264196 | LOC108264196 | 231 |
| 108264531 | LOC108264531 | 152 |
| 108266135 | LOC108266135 | 268 |
| 100415908 | LOC100415908 | 223 |
| 108255397 | batf         | 124 |
| 108256237 | azi2         | 353 |
| 108257382 | LOC108257382 | 132 |
| 108258651 | LOC108258651 | 186 |
| 108261625 | LOC108261625 | 130 |

|           |              |     |
|-----------|--------------|-----|
| 108262793 | LOC108262793 | 259 |
| 108263248 | LOC108263248 | 111 |
| 108265287 | stap2        | 415 |
| 108267188 | LOC108267188 | 101 |
| 108268115 | LOC108268115 | 97  |
| 108268327 | ltbr         | 353 |
| 108269344 | LOC108269344 | 78  |
| 108271554 | LOC108271554 | 223 |
| 108272639 | LOC108272639 | 218 |
| 108273140 | LOC108273140 | 158 |
| 108275426 | LOC108275426 | 129 |
| 108277757 | LOC108277757 | 281 |
| 108280668 | mbp          | 133 |
| 108280775 | LOC108280775 | 290 |
| 100304478 | LOC100304478 | 60  |
| 100528404 | rabif        | 133 |
| 100528408 | tesc         | 123 |
| 100528986 | znrd1        | 133 |
| 108256239 | cmc1         | 107 |
| 108256026 | carnmt1      | 418 |
| 108264825 | LOC108264825 | 689 |
| 108275464 | mdp1         | 160 |
| 108256275 | hert         | 126 |
| 108265761 | clps         | 136 |
| 108266496 | LOC108266496 | 114 |
| 108269592 | mtfr11       | 303 |
| 804876    | ATP8         | 55  |
| 804879    | ND5          | 607 |
| 804883    | ND2          | 348 |
| 100528072 | cf125        | 129 |
| 100528912 | ndufb4       | 127 |
| 108254755 | arv1         | 241 |
| 108259146 | agrp         | 143 |
| 108263832 | LOC108263832 | 112 |
| 108263890 | LOC108263890 | 108 |
| 108267455 | pex19        | 282 |
| 108268603 | ndufc1       | 69  |
| 108272167 | LOC108272167 | 76  |
| 108272602 | atp5e        | 51  |
| 108274303 | nt5m         | 230 |
| 108276884 | LOC108276884 | 125 |
| 108280490 | LOC108280490 | 55  |
| 108257443 | LOC108257443 | 645 |
| 108274881 | LOC108274881 | 128 |
| 108280026 | LOC108280026 | 305 |
| 804878    | ND3          | 116 |
| 108259575 | pex11a       | 246 |
| 100528592 | spcs1        | 101 |
| 108276972 | LOC108276972 | 113 |
| 108278384 | spcs2        | 219 |
| 100528255 | cck          | 123 |



|           |              |      |
|-----------|--------------|------|
| 108270925 | LOC108270925 | 193  |
| 108270874 | tim13        | 95   |
| 108280891 | LOC108280891 | 90   |
| 108255480 | ascc2        | 763  |
| 108267567 | LOC108267567 | 124  |
| 108271096 | elp4         | 389  |
| 108271274 | nr2c2ap      | 141  |
| 108269806 | mrps5        | 400  |
| 108258002 | LOC108258002 | 177  |
| 108273408 | mrpl58       | 198  |
| 100528801 | mrps14       | 133  |
| 108280907 | mrpl34       | 115  |
| 108265414 | tgoln2       | 307  |
| 804877    | ATP6         | 227  |
| 804880    | ND1          | 324  |
| 804885    | COX3         | 261  |
| 108256436 | pkiA         | 85   |
| 108264506 | c4h15orf48   | 87   |
| 108272514 | smdt1        | 97   |
| 108280886 | LOC108280886 | 171  |
| 804875    | COX2         | 230  |
| 804881    | ND4L         | 98   |
| 100528515 | vps28        | 223  |
| 108257495 | tomm7        | 55   |
| 108264547 | nutf2        | 127  |
| 108273994 | tomm22       | 133  |
| 108276560 | lyrm7        | 104  |
| 108277678 | LOC108277678 | 916  |
| 108278988 | slc31a2      | 138  |
| 108268928 | LOC108268928 | 177  |
| 108259733 | LOC108259733 | 219  |
| 108271080 | LOC108271080 | 342  |
| 108272891 | LOC108272891 | 300  |
| 108259533 | LOC108259533 | 211  |
| 108260286 | LOC108260286 | 1346 |
| 108264443 | LOC108264443 | 449  |
| 108278302 | LOC108278302 | 180  |
| 108263206 | bore7        | 103  |
| 108263260 | LOC108263260 | 100  |
| 108267632 | LOC108267632 | 139  |
| 108268185 | LOC108268185 | 215  |
| 108276417 | LOC108276417 | 241  |
| 108278804 | LOC108278804 | 365  |
| 100528339 | dal1b        | 102  |
| 108257542 | ociad2       | 160  |
| 108258663 | LOC108258663 | 107  |
| 108259248 | LOC108259248 | 227  |
| 108260035 | LOC108260035 | 270  |
| 108260899 | LOC108260899 | 264  |
| 108262451 | LOC108262451 | 224  |
| 108266945 | LOC108266945 | 224  |

|           |              |     |
|-----------|--------------|-----|
| 108267969 | LOC108267969 | 407 |
| 108268874 | LOC108268874 | 222 |
| 108270531 | tmem44       | 454 |
| 108271423 | LOC108271423 | 222 |
| 108274023 | c13h10orf128 | 91  |
| 108274089 | LOC108274089 | 264 |
| 108274225 | LOC108274225 | 394 |
| 108274412 | smim22       | 81  |
| 108274670 | LOC108274670 | 112 |
| 108278494 | LOC108278494 | 142 |
| 108279884 | ccdc167      | 100 |
| 108280991 | LOC108280991 | 222 |
| 100305002 | LOC100305002 | 184 |
| 100528681 | cops9        | 57  |
| 100528768 | lyrm5        | 85  |
| 108254720 | LOC108254720 | 209 |
| 108257072 | LOC108257072 | 267 |
| 108257214 | LOC108257214 | 408 |
| 108258433 | LOC108258433 | 378 |
| 108259252 | LOC108259252 | 210 |
| 108259526 | LOC108259526 | 249 |
| 108259529 | fam207a      | 237 |
| 108259534 | LOC108259534 | 211 |
| 108260421 | LOC108260421 | 151 |
| 108262792 | LOC108262792 | 416 |
| 108263973 | LOC108263973 | 410 |
| 108264385 | kiaa0513     | 421 |
| 108265078 | LOC108265078 | 263 |
| 108265611 | c5h9orf116   | 141 |
| 108265844 | LOC108265844 | 209 |
| 108266094 | LOC108266094 | 243 |
| 108266430 | LOC108266430 | 258 |
| 108266545 | LOC108266545 | 218 |
| 108266787 | c6h21orf62   | 214 |
| 108267124 | c7h22orf39   | 108 |
| 108267255 | LOC108267255 | 124 |
| 108267286 | LOC108267286 | 224 |
| 108267350 | LOC108267350 | 203 |
| 108267429 | LOC108267429 | 129 |
| 108267962 | c7h4orf48    | 86  |
| 108268437 | LOC108268437 | 595 |
| 108268660 | LOC108268660 | 363 |
| 108269355 | LOC108269355 | 204 |
| 108269361 | c8h12orf73   | 64  |
| 108269490 | tmem229b     | 185 |
| 108270539 | c1h16orf91   | 155 |
| 108270745 | LOC108270745 | 925 |
| 108270746 | LOC108270746 | 921 |
| 108271006 | LOC108271006 | 491 |
| 108271220 | serf2        | 59  |
| 108272510 | ccdc134      | 229 |

|           |              |     |
|-----------|--------------|-----|
| 108272745 | LOC108272745 | 363 |
| 108272856 | hn1          | 139 |
| 108273013 | LOC108273013 | 239 |
| 108273081 | LOC108273081 | 173 |
| 108273612 | LOC108273612 | 127 |
| 108274251 | LOC108274251 | 425 |
| 108274403 | c2h8orf82    | 213 |
| 108274852 | LOC108274852 | 247 |
| 108275268 | lrrc61       | 281 |
| 108275551 | LOC108275551 | 326 |
| 108275692 | LOC108275692 | 432 |
| 108276725 | LOC108276725 | 114 |
| 108276957 | LOC108276957 | 271 |
| 108277089 | LOC108277089 | 87  |
| 108278455 | LOC108278455 | 202 |
| 108278465 | LOC108278465 | 209 |
| 108279232 | c18h5orf15   | 290 |

---

**Table S3. Chemokine *ccl33* in barbel-ed fish.**

| Species          | Gene           | Accession          | Previous name | Reference      |
|------------------|----------------|--------------------|---------------|----------------|
| Zebrafish        | <i>ccl33.2</i> | ENSDARG00000102519 | CCL-chr25h    | Ensembl GRCz10 |
| Zebrafish        | <i>ccl33.3</i> | ENSDARG00000099401 | CCL-chr25a    | Ensembl GRCz10 |
| Channel catfish  | <i>ccl33.1</i> | JT348749           | SCYA121       | (1, 2)         |
| Channel catfish  | <i>ccl33.2</i> | XP_017330655       | SCYA117       | (1, 2)         |
| Channel catfish  | <i>ccl33.3</i> | XP_017330182       | SCYA111       | (1, 2)         |
| Channel catfish  | <i>ccl33.4</i> | XP_017330183       |               | (2)            |
| Channel catfish  | <i>ccl33.5</i> | XP_017329053       |               | (2)            |
| Channel catfish  | <i>ccl33.6</i> | XP_017330184       |               | (2)            |
| Channel catfish  | <i>ccl33.7</i> | XP_017328905       |               | (2)            |
| Channel catfish  | <i>ccl33.8</i> | JT396455           |               | (2)            |
| Channel catfish  | <i>ccl33.9</i> | ABA54969           | SCYA122       | (1, 2)         |
| Common carp      | <i>ccl33.1</i> | XP_018950216.1     | CCL3          | This study     |
| Common carp      | <i>ccl33.2</i> | XP_018950218.1     | CCL4          | This study     |
| Common carp      | <i>ccl33.3</i> | XP_018950217.1     | CCL3          | This study     |
| Common carp      | <i>ccl33.4</i> | XP_018980780.1     | CCL4          | This study     |
| Golden line fish | <i>ccl33.1</i> | XP_016123015.1     | CCL4          | This study     |
| Golden line fish | <i>ccl33.2</i> | XP_016123023.1     | CCL4          | This study     |
| Golden line fish | <i>ccl33.3</i> | XP_016124759.1     | CCL3          | This study     |

**Table S4. Sequences of the genomic target sites of zebrafish *ccl33* genes.**

| Target gene    | Strand | Target sequence       |
|----------------|--------|-----------------------|
| <i>ccl33.2</i> | -      | CCGCCCTGCCCATGGATGTCC |
| <i>ccl33.2</i> | -      | CCCTTGCCCCTGCCACCACCG |
| <i>ccl33.2</i> | -      | CCACGAGAGCCAAAACCACCA |
| <i>ccl33.3</i> | -      | CCCGAACCTGTTGCTTCAAT  |
| <i>ccl33.3</i> | -      | CCAATCCCAGCCAACAAAGTA |
| <i>ccl33.3</i> | +      | TTCACGCTGTGCTGTAAAGG  |

**Table S5. Primers for antisense probe preparation for in situ hybridization analysis of *ccl33* genes in zebrafish embryos.**

| Primer name     | Sequences                    |
|-----------------|------------------------------|
| <i>ccl33.2F</i> | 5'-CACCATGAGCAGTCCGCCCTGC-3' |
| <i>ccl33.2R</i> | 5'-GGCCAGGAATGGA ACTTC-3'    |
| <i>ccl33.3F</i> | 5'-CTGCAATTCCCGAACCCCT-3'    |
| <i>ccl33.3R</i> | 5'-ACATGCCTTTAACAGCA-3'      |

**Table S6. Sequences of zebrafish real-time PCR primers.**

| Primer name         | Sequence (5' -> 3')       |
|---------------------|---------------------------|
| <i>ccl33.2_P1_F</i> | ACCAAATGAAGTATGGATAAAGGCT |
| <i>ccl33.2_P1_R</i> | TGTGCACAGTATTGTGTTGTGG    |
| <i>ccl33.3_P1_F</i> | GTGTTTCTGCTGCTTGGACTG     |
| <i>ccl33.3_P1_R</i> | GCAACAGGGTTCGGGAATTG      |
| <i>18S_F</i>        | TCGCTAGTTGGCATCGTTTATG    |
| <i>18S_R</i>        | CGGAGGTTCGAAGACGATCA      |
| <i>b2m_F</i>        | GCCTTCACCCCAGAGAAAGG      |
| <i>b2m_R</i>        | GCGGTTGGGATTTACATGTTG     |

**Table S7. Sequences of the channel catfish real-time PCR primers.**

| Primer           | Sequence (5'->3')       |
|------------------|-------------------------|
| <i>ccl33.1F1</i> | GCAACACGTACGCACCATTC    |
| <i>ccl33.1R1</i> | TCAGAATCACAGTGCAGCCT    |
| <i>ccl33.2F1</i> | CTCAGACGCTCAGCCTTTTG    |
| <i>ccl33.2R1</i> | GTCATGGCAGCCGGATTCT     |
| <i>ccl33.3F2</i> | GCAGCTTTCACGCAACTGAA    |
| <i>ccl33.3R2</i> | TGAAATGAAGCTTCGCACCG    |
| <i>ccl33.4F2</i> | CGATAAAACCAGACCCCAACAAA |
| <i>ccl33.4R2</i> | GAGCGCCATGATCAGGACAA    |
| <i>ccl33.5F2</i> | GCTCTACTCAGACGCTAAACC   |
| <i>ccl33.5R2</i> | TGAAGCCTTGCTTTGGACAAC   |
| <i>ccl33.6F1</i> | CGCTCTACTCAGACGCTATTCC  |
| <i>ccl33.6R1</i> | GACAACGTGAGCCAGTCTTT    |
| <i>ccl33.7F2</i> | CCAAACCCTGAGGACTGCTG    |
| <i>ccl33.7R2</i> | TGAAGCCTTGCAGTGAACAG    |
| <i>ccl33.8F1</i> | CGCTCCTTAGGTGTCGTAACA   |
| <i>ccl33.8R1</i> | ATGATGCTGTCCTCAGATGCT   |
| <i>ccl33.9F2</i> | TGGAATGTTTCCAGTGGGAGG   |
| <i>ccl33.9R2</i> | AAATTTGCCTGAGCAGGGGT    |
| <i>18S_f</i>     | GAGAAACGGCTACCACATCC    |
| <i>18S_r</i>     | GATACGCTCATTCCGATTACAG  |
| <i>gusb_f</i>    | AAGATGGCCGATGTGTATCC    |
| <i>gusb_r</i>    | TATCCTGGGTTCTGGTGCAT    |



**Table S8. Sequences of the PCR primers for amplifying the zebrafish target regions.**

| Target gene    | Oligo Name               | Sequence (5'→3')         |
|----------------|--------------------------|--------------------------|
| <i>ccl33.2</i> | <i>ccl33.2</i> Primer3 F | AGCTCAATTTTCTCCGGGCT     |
| <i>ccl33.2</i> | <i>ccl33.2</i> Primer3 R | TGACAGCAGAACTTACGGCCA    |
| <i>ccl33.3</i> | <i>ccl33.3</i> Primer1 F | CCCGAACCCCTGTTGCTTCAA    |
| <i>ccl33.3</i> | <i>ccl33.3</i> Primer1 R | ATGCACACATTCAAATGACATCAG |

**Additional dataset1 (separate file)**

Genes present in channel catfish, and absent in bottlenose catfish.

**Additional dataset2 (separate file)**

Differentially expressed genes during barbel regeneration of channel catfish.

**References**

1. Bao B, *et al.* (2006) Characterization of 23 CC chemokine genes and analysis of their expression in channel catfish (*Ictalurus punctatus*). *Dev Comp Immunol* 30:783-796.
2. Fu Q, *et al.* (2017) The chemokine superfamily: II. The 64 CC chemokines in channel catfish and their involvement in disease and hypoxia responses. *Dev Comp Immunol* 73:97-108.
