# Supplementary material
Source: PubMed Central journal article supplement (PMC5984497)
Supplement: pnas.1718603115.sd01.pdf [file pnas.1718603115.sd01.pdf]

Dataset 1 Genes present in channel catfish, and absent in bottlenose catfish.

| Gene ID   | Locus        | Protein product | Length |
|-----------|--------------|-----------------|--------|
| 108255763 | LOC108255763 | XP_017307450.1  | 2337   |
| 108256026 | carnmt1      | XP_017307985.1  | 418    |
| 108256526 | polr1d       | XP_017308970.1  | 172    |
| 108257874 | atraid       | XP_017311470.1  | 230    |
| 108259733 | LOC108259733 | XP_017314930.1  | 219    |
| 108262226 | LOC108262226 | XP_017318301.1  | 186    |
| 108262879 | LOC108262879 | XP_017318723.1  | 329    |
| 108264799 | LOC108264799 | XP_017322162.1  | 383    |
| 108264825 | LOC108264825 | XP_017322217.1  | 689    |
| 108265132 | c1h8orf59    | XP_017322758.1  | 98     |
| 108268648 | fanca        | XP_017329197.1  | 1141   |
| 108270530 | LOC108270530 | XP_017332816.1  | 228    |
| 108271080 | LOC108271080 | XP_017333819.1  | 342    |
| 108272891 | LOC108272891 | XP_017337204.1  | 300    |
| 108273999 | ccser2       | XP_017339238.1  | 791    |
| 108274164 | bricd5       | XP_017339608.1  | 228    |
| 108275464 | mdp1         | XP_017341794.1  | 160    |
| 100304470 | b2m          | NP_001187001.1  | 116    |
| 100304887 | cript        | NP_001232877.1  | 101    |
| 100305060 | LOC100305060 | NP_001187223.1  | 78     |
| 108259533 | LOC108259533 | XP_017314605.1  | 211    |
| 108260286 | LOC108260286 | XP_017315915.1  | 1346   |
| 108264443 | LOC108264443 | XP_017321459.1  | 449    |
| 108265414 | tgoln2       | XP_017323183.1  | 307    |
| 108266931 | LOC108266931 | XP_017326252.1  | 197    |
| 108270925 | LOC108270925 | XP_017333435.1  | 193    |
| 108271021 | LOC108271021 | XP_017333665.1  | 119    |
| 108278302 | LOC108278302 | XP_017347058.1  | 180    |
| 108280891 | LOC108280891 | XP_017351876.1  | 90     |
| 804877    | ATP6         | NP_612130.1     | 227    |
| 804880    | ND1          | NP_612125.1     | 324    |
| 100304584 | LOC100304584 | NP_001187095.1  | 105    |
| 100528356 | brk1         | NP_001187555.1  | 75     |
| 108255519 | LOC108255519 | XP_017307008.1  | 110    |
| 108256275 | hert         | XP_017308436.1  | 126    |
| 108257472 | edn1         | XP_017310769.1  | 195    |
| 108259812 | cchr1        | XP_017315017.1  | 692    |
| 108260858 | LOC108260858 | XP_017316999.1  | 231    |
| 108261098 | LOC108261098 | XP_017317468.1  | 226    |
| 108263206 | borcs7       | XP_017319270.1  | 103    |
| 108263260 | LOC108263260 | XP_017319384.1  | 100    |
| 108265761 | clps         | XP_017323916.1  | 136    |

|           |              |                |     |
|-----------|--------------|----------------|-----|
| 108266496 | LOC108266496 | XP_017325497.1 | 114 |
| 108267632 | LOC108267632 | XP_017327393.1 | 139 |
| 108268185 | LOC108268185 | XP_017328487.1 | 215 |
| 108268439 | LOC108268439 | XP_017328905.1 | 78  |
| 108269115 | LOC108269115 | XP_017330184.1 | 86  |
| 108269806 | mrps5        | XP_017331332.1 | 400 |
| 108271223 | cep19        | XP_017334118.1 | 160 |
| 108271379 | slc39a3      | XP_017334439.1 | 315 |
| 108273111 | ten1         | XP_017337625.1 | 126 |
| 108276417 | LOC108276417 | XP_017343554.1 | 241 |
| 108276694 | prr11        | XP_017344007.1 | 299 |
| 108278804 | LOC108278804 | XP_017347903.1 | 365 |
| 108280026 | LOC108280026 | XP_017350293.1 | 305 |
| 108280749 | LOC108280749 | XP_017351609.1 | 510 |
| 804878    | ND3          | NP_612132.1    | 116 |
| 804882    | ND4          | NP_612134.1    | 460 |
| 804885    | COX3         | NP_612131.1    | 261 |
| 804886    | ND6          | NP_612136.1    | 171 |
| 100304587 | LOC100304587 | NP_001187096.1 | 92  |
| 100304595 | LOC100304595 | XP_017306663.1 | 119 |
| 100528255 | cck          | NP_001187454.1 | 123 |
| 100528304 | ebag9        | NP_001187503.1 | 212 |
| 100528339 | dal1b        | NP_001187538.1 | 102 |
| 100528727 | arpc4        | NP_001187926.1 | 168 |
| 100529001 | psmf1        | NP_001188200.1 | 270 |
| 108254817 | LOC108254817 | XP_017305644.1 | 239 |
| 108255518 | LOC108255518 | XP_017307006.1 | 112 |
| 108255701 | LOC108255701 | XP_017307331.1 | 108 |
| 108256245 | LOC108256245 | XP_017308375.1 | 111 |
| 108256436 | pkia         | XP_017308799.1 | 85  |
| 108257443 | LOC108257443 | XP_017310711.1 | 645 |
| 108257542 | ociad2       | XP_017310896.1 | 160 |
| 108258002 | LOC108258002 | XP_017311708.1 | 177 |
| 108258663 | LOC108258663 | XP_017312951.1 | 107 |
| 108259248 | LOC108259248 | XP_017314029.1 | 227 |
| 108259575 | pex11a       | XP_017314657.1 | 246 |
| 108260035 | LOC108260035 | XP_017315449.1 | 270 |
| 108260899 | LOC108260899 | XP_017317094.1 | 264 |
| 108262451 | LOC108262451 | XP_017318391.1 | 224 |
| 108263381 | pdss2        | XP_017319591.1 | 381 |
| 108264196 | LOC108264196 | XP_017321018.1 | 231 |
| 108264363 | tsnaxip1     | XP_017321304.1 | 548 |
| 108264506 | c4h15orf48   | XP_017321604.1 | 87  |
| 108264531 | LOC108264531 | XP_017321623.1 | 152 |
| 108265590 | epgn         | XP_017323600.1 | 153 |

|           |              |                |     |
|-----------|--------------|----------------|-----|
| 108266135 | LOC108266135 | XP_017324656.1 | 268 |
| 108266359 | LOC108266359 | XP_017325014.1 | 332 |
| 108266750 | tex30        | XP_017325928.1 | 265 |
| 108266945 | LOC108266945 | XP_017326272.1 | 224 |
| 108267969 | LOC108267969 | XP_017328071.1 | 407 |
| 108268228 | ssx2ip       | XP_017328565.1 | 501 |
| 108268874 | LOC108268874 | XP_017329676.1 | 222 |
| 108268928 | LOC108268928 | XP_017329784.1 | 177 |
| 108269592 | mtfr1l       | XP_017331025.1 | 303 |
| 108270531 | tmem44       | XP_017332820.1 | 454 |
| 108270589 | LOC108270589 | XP_017332908.1 | 463 |
| 108271423 | LOC108271423 | XP_017334509.1 | 222 |
| 108272514 | smdt1        | XP_017336449.1 | 97  |
| 108273408 | mrpl58       | XP_017338087.1 | 198 |
| 108274023 | c13h10orf128 | XP_017339285.1 | 91  |
| 108274089 | LOC108274089 | XP_017339438.1 | 264 |
| 108274225 | LOC108274225 | XP_017339729.1 | 394 |
| 108274412 | smim22       | XP_017340039.1 | 81  |
| 108274670 | LOC108274670 | XP_017340388.1 | 112 |
| 108275545 | haus8        | XP_017341915.1 | 364 |
| 108278494 | LOC108278494 | XP_017347401.1 | 142 |
| 108279884 | ccdc167      | XP_017349960.1 | 100 |
| 108280886 | LOC108280886 | XP_017351869.1 | 171 |
| 108280991 | LOC108280991 | XP_017351996.1 | 222 |
| 108281088 | LOC108281088 | XP_017352141.1 | 130 |
| 804875    | COX2         | NP_612128.1    | 230 |
| 804876    | ATP8         | NP_612129.1    | 55  |
| 804879    | ND5          | NP_612135.1    | 607 |
| 804881    | ND4L         | NP_612133.1    | 98  |
| 804883    | ND2          | NP_612126.1    | 348 |
| 100304478 | LOC100304478 | NP_001187006.1 | 60  |
| 100305002 | LOC100305002 | NP_001187171.1 | 184 |
| 100415908 | LOC100415908 | NP_001187260.1 | 223 |
| 100528072 | cf125        | NP_001187271.1 | 129 |
| 100528215 | emc4         | NP_001187414.1 | 187 |
| 100528363 | gins3        | NP_001187562.1 | 211 |
| 100528404 | rabif        | NP_001187603.1 | 133 |
| 100528408 | tesc         | NP_001187607.1 | 123 |
| 100528430 | anapc13      | NP_001187629.1 | 74  |
| 100528515 | vps28        | NP_001187714.1 | 223 |
| 100528592 | spcs1        | NP_001187791.1 | 101 |
| 100528639 | skp1         | NP_001187838.1 | 163 |
| 100528677 | pdcd5        | NP_001187876.1 | 126 |
| 100528681 | cops9        | NP_001187880.1 | 57  |
| 100528704 | mzt1         | NP_001187903.1 | 75  |

|           |              |                |     |
|-----------|--------------|----------------|-----|
| 100528768 | lyrm5        | NP_001187967.1 | 85  |
| 100528801 | mrps14       | NP_001188000.1 | 133 |
| 100528912 | ndufb4       | NP_001188111.1 | 127 |
| 100528986 | znrd1        | NP_001188185.1 | 133 |
| 108254720 | LOC108254720 | XP_017305459.1 | 209 |
| 108254755 | arv1         | XP_017305523.1 | 241 |
| 108255397 | batf         | XP_017306830.1 | 124 |
| 108255480 | ascc2        | XP_017306909.1 | 763 |
| 108255648 | LOC108255648 | XP_017307240.1 | 232 |
| 108255681 | LOC108255681 | XP_017307300.1 | 204 |
| 108256237 | azi2         | XP_017308361.1 | 353 |
| 108256239 | cmc1         | XP_017308367.1 | 107 |
| 108256594 | LOC108256594 | XP_017309125.1 | 83  |
| 108256728 | LOC108256728 | XP_017309381.1 | 157 |
| 108257072 | LOC108257072 | XP_017309972.1 | 267 |
| 108257184 | cap2         | XP_017310199.1 | 389 |
| 108257214 | LOC108257214 | XP_017310313.1 | 408 |
| 108257382 | LOC108257382 | XP_017310602.1 | 132 |
| 108257495 | tomm7        | XP_017310796.1 | 55  |
| 108258433 | LOC108258433 | XP_017312537.1 | 378 |
| 108258502 | pld6         | XP_017312671.1 | 243 |
| 108258651 | LOC108258651 | XP_017312925.1 | 186 |
| 108258791 | cytl1        | XP_017313201.1 | 192 |
| 108259146 | agrp         | XP_017313858.1 | 143 |
| 108259227 | cklf         | XP_017313985.1 | 143 |
| 108259252 | LOC108259252 | XP_017314032.1 | 210 |
| 108259526 | LOC108259526 | XP_017314593.1 | 249 |
| 108259529 | fam207a      | XP_017314596.1 | 237 |
| 108259534 | LOC108259534 | XP_017314606.1 | 211 |
| 108260421 | LOC108260421 | XP_017316197.1 | 151 |
| 108260508 | LOC108260508 | XP_017316354.1 | 170 |
| 108260511 | slc9b2       | XP_017316357.1 | 533 |
| 108261049 | LOC108261049 | XP_017317354.1 | 163 |
| 108261625 | LOC108261625 | XP_017317933.1 | 130 |
| 108262792 | LOC108262792 | XP_017318612.1 | 416 |
| 108262793 | LOC108262793 | XP_017318613.1 | 259 |
| 108263202 | apopt1       | XP_017319259.1 | 198 |
| 108263248 | LOC108263248 | XP_017319364.1 | 111 |
| 108263386 | kmo          | XP_017319604.1 | 473 |
| 108263832 | LOC108263832 | XP_017320489.1 | 112 |
| 108263890 | LOC108263890 | XP_017320565.1 | 108 |
| 108263973 | LOC108263973 | XP_017320709.1 | 410 |
| 108264385 | kiaa0513     | XP_017321347.1 | 421 |
| 108264547 | nutf2        | XP_017321659.1 | 127 |
| 108265078 | LOC108265078 | XP_017322663.1 | 263 |

|           |              |                |     |
|-----------|--------------|----------------|-----|
| 108265287 | stap2        | XP_017322931.1 | 415 |
| 108265611 | c5h9orf116   | XP_017323639.1 | 141 |
| 108265844 | LOC108265844 | XP_017324081.1 | 209 |
| 108266094 | LOC108266094 | XP_017324579.1 | 243 |
| 108266430 | LOC108266430 | XP_017325223.1 | 258 |
| 108266545 | LOC108266545 | XP_017325499.1 | 218 |
| 108266662 | dcaf17       | XP_017325779.1 | 529 |
| 108266787 | c6h21orf62   | XP_017326002.1 | 214 |
| 108266789 | LOC108266789 | XP_017326011.1 | 132 |
| 108267124 | c7h22orf39   | XP_017326584.1 | 108 |
| 108267188 | LOC108267188 | XP_017326670.1 | 101 |
| 108267255 | LOC108267255 | XP_017326735.1 | 124 |
| 108267286 | LOC108267286 | XP_017326792.1 | 224 |
| 108267350 | LOC108267350 | XP_017326880.1 | 203 |
| 108267429 | LOC108267429 | XP_017326988.1 | 129 |
| 108267455 | pex19        | XP_017327016.1 | 282 |
| 108267567 | LOC108267567 | XP_017327250.1 | 124 |
| 108267962 | c7h4orf48    | XP_017328062.1 | 86  |
| 108268115 | LOC108268115 | XP_017328326.1 | 97  |
| 108268327 | ltbr         | XP_017328717.1 | 353 |
| 108268437 | LOC108268437 | XP_017328903.1 | 595 |
| 108268603 | ndufc1       | XP_017329138.1 | 69  |
| 108268660 | LOC108268660 | XP_017329227.1 | 363 |
| 108268687 | LOC108268687 | XP_017329271.1 | 241 |
| 108268882 | tmsb15b      | XP_017329693.1 | 46  |
| 108268918 | LOC108268918 | XP_017329751.1 | 115 |
| 108269344 | LOC108269344 | XP_017330655.1 | 78  |
| 108269355 | LOC108269355 | XP_017330676.1 | 204 |
| 108269361 | c8h12orf73   | XP_017330683.1 | 64  |
| 108269490 | tmem229b     | XP_017330904.1 | 185 |
| 108270120 | LOC108270120 | XP_017331955.1 | 127 |
| 108270394 | crls1        | XP_017332524.1 | 378 |
| 108270478 | cfl2         | XP_017332713.1 | 166 |
| 108270539 | c1h16orf91   | XP_017332839.1 | 155 |
| 108270745 | LOC108270745 | XP_017333119.1 | 925 |
| 108270746 | LOC108270746 | XP_017333120.1 | 921 |
| 108270874 | timm13       | XP_017333325.1 | 95  |
| 108271006 | LOC108271006 | XP_017333637.1 | 491 |
| 108271096 | elp4         | XP_017333857.1 | 389 |
| 108271220 | serf2        | XP_017334114.1 | 59  |
| 108271274 | nr2c2ap      | XP_017334228.1 | 141 |
| 108271425 | tax1bp3      | XP_017334514.1 | 125 |
| 108271519 | snrpc        | XP_017334632.1 | 159 |
| 108271554 | LOC108271554 | XP_017334684.1 | 223 |
| 108272082 | LOC108272082 | XP_017335732.1 | 75  |

|           |              |                |     |
|-----------|--------------|----------------|-----|
| 108272167 | LOC108272167 | XP_017335903.1 | 76  |
| 108272348 | cks1b        | XP_017336199.1 | 79  |
| 108272510 | ccdc134      | XP_017336446.1 | 229 |
| 108272602 | atp5e        | XP_017336584.1 | 51  |
| 108272615 | pex11b       | XP_017336601.1 | 252 |
| 108272622 | dctn3        | XP_017336621.1 | 185 |
| 108272639 | LOC108272639 | XP_017336661.1 | 218 |
| 108272745 | LOC108272745 | XP_017336922.1 | 363 |
| 108272856 | hn1          | XP_017337160.1 | 139 |
| 108273013 | LOC108273013 | XP_017337460.1 | 239 |
| 108273081 | LOC108273081 | XP_017337557.1 | 173 |
| 108273140 | LOC108273140 | XP_017337676.1 | 158 |
| 108273612 | LOC108273612 | XP_017338452.1 | 127 |
| 108273994 | tomm22       | XP_017339229.1 | 133 |
| 108274251 | LOC108274251 | XP_017339791.1 | 425 |
| 108274303 | nt5m         | XP_017339890.1 | 230 |
| 108274403 | c2h8orf82    | XP_017340011.1 | 213 |
| 108274852 | LOC108274852 | XP_017340775.1 | 247 |
| 108274856 | LOC108274856 | XP_017340782.1 | 231 |
| 108274859 | LOC108274859 | XP_017340785.1 | 226 |
| 108274881 | LOC108274881 | XP_017340817.1 | 128 |
| 108275268 | lrrc61       | XP_017341463.1 | 281 |
| 108275426 | LOC108275426 | XP_017341728.1 | 129 |
| 108275551 | LOC108275551 | XP_017341922.1 | 326 |
| 108275692 | LOC108275692 | XP_017342101.1 | 432 |
| 108276169 | cenpw        | XP_017343137.1 | 75  |
| 108276560 | lyrm7        | XP_017343819.1 | 104 |
| 108276725 | LOC108276725 | XP_017344082.1 | 114 |
| 108276884 | LOC108276884 | XP_017344430.1 | 125 |
| 108276957 | LOC108276957 | XP_017344627.1 | 271 |
| 108276972 | LOC108276972 | XP_017344667.1 | 113 |
| 108277089 | LOC108277089 | XP_017344948.1 | 87  |
| 108277678 | LOC108277678 | XP_017345975.1 | 916 |
| 108277757 | LOC108277757 | XP_017346142.1 | 281 |
| 108278384 | spcs2        | XP_017347223.1 | 219 |
| 108278455 | LOC108278455 | XP_017347336.1 | 202 |
| 108278465 | LOC108278465 | XP_017347351.1 | 209 |
| 108278988 | slc31a2      | XP_017348330.1 | 138 |
| 108279232 | c18h5orf15   | XP_017348793.1 | 290 |
| 108279644 | orc5         | XP_017349462.1 | 445 |
| 108279850 | LOC108279850 | XP_017349874.1 | 222 |
| 108280490 | LOC108280490 | XP_017351002.1 | 55  |
| 108280668 | mbp          | XP_017351437.1 | 133 |
| 108280775 | LOC108280775 | XP_017351656.1 | 290 |
| 108280863 | twsg1        | XP_017351823.1 | 223 |

|           |              |                |     |
|-----------|--------------|----------------|-----|
| 108280907 | mrpl34       | XP_017351897.1 | 115 |
| 804884    | COX1         | NP_612127.1    | 516 |
| 804887    | CYTB         | NP_612137.1    | 379 |
| 100304479 | cga          | NP_001187007.1 | 116 |
| 100304514 | LOC100304514 | NP_001187029.1 | 550 |
| 100304516 | rplp1        | NP_001187031.1 | 113 |
| 100304521 | rpl6         | XP_017323447.1 | 262 |
| 100304529 | rpl13        | NP_001187042.1 | 211 |
| 100304531 | rpl14        | NP_001187043.1 | 141 |
| 100304533 | rpl18        | NP_001187045.1 | 188 |
| 100304534 | rpl18a       | NP_001187046.1 | 176 |
| 100304543 | rpl29        | NP_001187054.1 | 64  |
| 100304549 | LOC100304549 | NP_001187060.1 | 106 |
| 100304550 | rpl37        | NP_001187061.1 | 97  |
| 100304551 | rpl37a       | NP_001187062.1 | 92  |
| 100304552 | rpl38        | NP_001187063.1 | 70  |
| 100304554 | rpl41        | NP_001187065.1 | 25  |
| 100304557 | rps3         | NP_001187068.1 | 245 |
| 100304558 | rps4x        | NP_001187069.1 | 263 |
| 100304561 | rps7         | NP_001187072.1 | 194 |
| 100304566 | rps14        | NP_001187077.1 | 151 |
| 100304569 | LOC100304569 | NP_001187080.1 | 134 |
| 100304579 | rps29        | NP_001187090.1 | 56  |
| 100304588 | LOC100304588 | XP_017326447.1 | 137 |
| 100304589 | LOC100304589 | NP_001187098.1 | 87  |
| 100304604 | ifn          | NP_001187107.1 | 162 |
| 100304621 | LOC100304621 | XP_017313766.1 | 173 |
| 100304622 | gcg          | NP_001187117.1 | 120 |
| 100304630 | LOC100304630 | XP_017330182.1 | 81  |
| 100304631 | LOC100304631 | XP_017326449.1 | 117 |
| 100304644 | LOC100304644 | NP_001187134.1 | 94  |
| 100304692 | LOC100304692 | NP_001187144.1 | 81  |
| 100304698 | LOC100304698 | XP_017350431.1 | 298 |
| 100304709 | LOC100304709 | NP_001232870.1 | 44  |
| 100304735 | eif1b        | NP_001232871.1 | 113 |
| 100304756 | gss          | XP_017342234.1 | 477 |
| 100304809 | ddost        | XP_017342350.1 | 466 |
| 100304934 | ssscal       | XP_017345580.1 | 257 |
| 100304967 | LOC100304967 | XP_017307935.1 | 269 |
| 100304977 | LOC100304977 | NP_001187154.1 | 520 |
| 100304978 | LOC100304978 | XP_017329493.1 | 471 |
| 100304979 | LOC100304979 | NP_001187156.1 | 412 |
| 100304990 | cd59         | NP_001187161.1 | 119 |
| 100304994 | cd79a        | NP_001187165.1 | 227 |
| 100305023 | cd247        | NP_001187191.1 | 153 |

|           |              |                |     |
|-----------|--------------|----------------|-----|
| 100305027 | sst2         | XP_017351534.1 | 105 |
| 100305047 | rpl10a       | NP_001187211.1 | 216 |
| 100305053 | rpl39        | NP_001187217.1 | 51  |
| 100305055 | rps11        | NP_001187218.1 | 159 |
| 100305056 | rps16        | NP_001187219.1 | 149 |
| 100329224 | LOC100329224 | NP_001187244.1 | 108 |
| 100379165 | il11         | XP_017336316.1 | 221 |
| 100526711 | nat9         | XP_017339780.1 | 218 |
| 100526712 | fam50a       | XP_017343230.1 | 323 |
| 100528083 | gstk1        | XP_017340493.1 | 213 |
| 100528089 | scnm1        | XP_017342376.1 | 253 |
| 100528105 | bbs5         | NP_001187304.1 | 320 |
| 100528129 | sc5d         | NP_001187328.1 | 281 |
| 100528135 | naa38        | NP_001187334.1 | 103 |
| 100528157 | pigf         | NP_001187356.1 | 219 |
| 100528158 | rdm1         | NP_001187357.1 | 280 |
| 100528161 | s39a9        | NP_001187360.1 | 306 |
| 100528168 | c5h9orf64    | NP_001187367.1 | 339 |
| 100528172 | wdr77        | NP_001187371.1 | 322 |
| 100528176 | hdhd3        | XP_017334553.1 | 243 |
| 100528187 | mtch2        | NP_001187386.1 | 300 |
| 100528206 | cmc4         | NP_001187405.1 | 71  |
| 100528212 | va0e1        | NP_001187411.1 | 81  |
| 100528228 | atox1        | NP_001187427.1 | 67  |
| 100528240 | ska2         | XP_017343725.1 | 230 |
| 100528243 | med20        | NP_001187442.1 | 212 |
| 100528245 | mrpl10       | NP_001187444.1 | 255 |
| 100528253 | EIF3K        | NP_001187452.1 | 219 |
| 100528257 | elp6         | NP_001187456.1 | 268 |
| 100528262 | fmc1         | NP_001187461.1 | 110 |
| 100528272 | rbx1         | NP_001187471.1 | 108 |
| 100528301 | mustn1       | NP_001187500.1 | 78  |
| 100528302 | ost4         | NP_001187501.1 | 37  |
| 100528303 | smim7        | XP_017332752.1 | 104 |
| 100528337 | trappc4      | NP_001187536.1 | 219 |
| 100528343 | ufm1         | NP_001187542.1 | 90  |
| 100528355 | lamtor5      | NP_001187554.1 | 91  |
| 100528360 | cwc15        | NP_001187559.1 | 231 |
| 100528364 | f162b        | NP_001187563.1 | 155 |
| 100528378 | wdr83os      | NP_001187577.1 | 106 |
| 100528379 | nhej1        | NP_001187578.1 | 319 |
| 100528382 | htatip2      | NP_001187581.1 | 248 |
| 100528395 | anfc1        | XP_017318884.1 | 132 |
| 100528401 | creld2       | NP_001187600.1 | 289 |
| 100528407 | c28hxor56    | NP_001187606.1 | 224 |



|           |             |                |     |
|-----------|-------------|----------------|-----|
| 100528414 | rpe         | XP_017324522.1 | 183 |
| 100528437 | psmg4       | NP_001187636.1 | 126 |
| 100528457 | taf7l       | XP_017328782.1 | 362 |
| 100528458 | snrpd2      | NP_001187657.1 | 118 |
| 100528459 | ptpmt1      | XP_017313779.1 | 185 |
| 100528467 | col         | NP_001187666.1 | 113 |
| 100528469 | ndufaf4     | NP_001187668.1 | 174 |
| 100528479 | c24h1orf109 | NP_001187678.1 | 202 |
| 100528497 | tm14c       | NP_001187696.1 | 107 |
| 100528498 | tac1        | XP_017336125.1 | 107 |
| 100528507 | mrps24      | NP_001187706.1 | 171 |
| 100528508 | eapp        | NP_001187707.1 | 310 |
| 100528513 | polr2l      | NP_001187712.1 | 67  |
| 100528516 | polr2j      | NP_001187715.1 | 117 |
| 100528517 | mycbp       | NP_001187716.1 | 103 |
| 100528518 | cp080       | NP_001187717.1 | 193 |
| 100528525 | mnd1        | NP_001187724.1 | 205 |
| 100528530 | mrpl5l      | NP_001187729.1 | 129 |
| 100528536 | guc2a       | NP_001187735.1 | 108 |
| 100528538 | pop5        | NP_001187737.1 | 167 |
| 100528548 | cnot9       | NP_001187747.1 | 297 |
| 100528550 | pop7        | NP_001187749.1 | 151 |
| 100528557 | nop10       | NP_001187756.1 | 64  |
| 100528558 | pttg        | NP_001187757.1 | 188 |
| 100528560 | tmem258     | NP_001187759.1 | 79  |
| 100528576 | mrpl32      | NP_001187775.1 | 175 |
| 100528578 | med8        | NP_001187777.1 | 266 |
| 100528590 | mcrip2      | NP_001187789.1 | 144 |
| 100528602 | supt4h1     | NP_001187801.1 | 117 |
| 100528603 | smn1        | NP_001187802.1 | 315 |
| 100528607 | pmm2        | NP_001187806.1 | 250 |
| 100528615 | ndufa2      | XP_017347290.1 | 100 |
| 100528619 | zfand1      | NP_001187818.1 | 270 |
| 100528620 | med11       | XP_017343742.1 | 140 |
| 100528627 | tmem141     | NP_001187826.1 | 128 |
| 100528632 | rnf7        | NP_001187831.1 | 111 |
| 100528641 | ysmu        | NP_001187840.1 | 268 |
| 100528642 | cdc26       | NP_001187841.1 | 86  |
| 100528646 | sival       | NP_001187845.1 | 173 |
| 100528647 | snrpe       | NP_001187846.1 | 92  |
| 100528653 | hddc3       | NP_001187852.1 | 179 |
| 100528660 | hikeshi     | NP_001187859.1 | 197 |
| 100528668 | hsbp1       | XP_017320578.1 | 76  |
| 100528675 | oxnad1      | NP_001187874.1 | 299 |
| 100528683 | chchd7      | XP_017326470.1 | 87  |

|           |             |                |     |
|-----------|-------------|----------------|-----|
| 100528688 | tango2      | XP_017306670.1 | 274 |
| 100528690 | meig1       | XP_017349154.1 | 92  |
| 100528702 | spaca9      | XP_017306675.1 | 210 |
| 100528707 | ccdc58      | NP_001187906.1 | 143 |
| 100528715 | taz         | NP_001187914.1 | 262 |
| 100528719 | apip        | NP_001187918.1 | 240 |
| 100528724 | pir         | NP_001187923.1 | 291 |
| 100528728 | pomp        | NP_001187927.1 | 142 |
| 100528732 | anapc11     | NP_001187931.1 | 88  |
| 100528735 | bola2       | NP_001187934.1 | 86  |
| 100528747 | pam16       | NP_001187946.1 | 138 |
| 100528764 | ndufs5      | XP_017309438.1 | 106 |
| 100528771 | rpa3        | NP_001187970.1 | 122 |
| 100528777 | ndufb2      | NP_001187976.1 | 100 |
| 100528778 | mrpl33      | NP_001187977.1 | 65  |
| 100528790 | c8h4orf47   | NP_001187989.1 | 313 |
| 100528791 | mcts1       | XP_017328794.1 | 181 |
| 100528792 | ndufa13     | NP_001187991.1 | 144 |
| 100528793 | cb064       | NP_001187992.1 | 75  |
| 100528795 | psmg3       | NP_001187994.1 | 120 |
| 100528829 | ntpcr       | NP_001188028.1 | 197 |
| 100528831 | aida        | XP_017338596.1 | 303 |
| 100528850 | hspb11      | NP_001188049.1 | 133 |
| 100528856 | pex3        | NP_001188055.1 | 366 |
| 100528857 | tmem82      | NP_001188056.1 | 339 |
| 100528862 | stpg1       | XP_017340046.1 | 326 |
| 100528867 | c18h11orf70 | NP_001188066.1 | 236 |
| 100528870 | nup35       | NP_001188069.1 | 310 |
| 100528895 | gtf2h5      | XP_017310853.1 | 71  |
| 100528896 | minos1      | NP_001188095.1 | 76  |
| 100528925 | wbscr22     | NP_001188124.1 | 282 |
| 100528934 | atpaf1      | XP_017332765.1 | 286 |
| 100528948 | tomm5       | NP_001188147.1 | 51  |
| 100528956 | c10h19orf25 | XP_017332776.1 | 104 |
| 100528959 | alg13       | NP_001188158.1 | 164 |
| 100528971 | lsm2        | NP_001188170.1 | 95  |
| 100528981 | ccdc124     | NP_001188180.1 | 214 |
| 100528983 | nosip       | XP_017338737.1 | 258 |
| 100528988 | crym        | XP_017338059.1 | 337 |
| 100529003 | gatad1      | NP_001188202.1 | 244 |
| 100529008 | rangrf      | NP_001188207.1 | 182 |
| 100529009 | sptssa      | NP_001188208.1 | 68  |
| 100529011 | aspdh       | NP_001188210.1 | 278 |
| 100529014 | cq072       | XP_017338829.1 | 255 |
| 100529017 | dap3        | NP_001188216.1 | 401 |

|           |              |                |      |
|-----------|--------------|----------------|------|
| 100529027 | ndufaf2      | NP_001188226.1 | 161  |
| 100529048 | glrx         | NP_001188247.1 | 106  |
| 100529049 | bcas2        | XP_017322329.1 | 208  |
| 101154653 | mxra8        | XP_017343117.1 | 445  |
| 108254697 | mfap2        | XP_017305432.1 | 142  |
| 108254699 | atad3a       | XP_017305435.1 | 660  |
| 108254725 | LOC108254725 | XP_017305467.1 | 562  |
| 108254727 | LOC108254727 | XP_017305478.1 | 1040 |
| 108254774 | LOC108254774 | XP_017305564.1 | 196  |
| 108254791 | LOC108254791 | XP_017305600.1 | 89   |
| 108254805 | tmem167b     | XP_017305612.1 | 74   |
| 108254814 | LOC108254814 | XP_017305638.1 | 123  |
| 108254893 | ift52        | XP_017305820.1 | 436  |
| 108254896 | LOC108254896 | XP_017305824.1 | 207  |
| 108254934 | chchd4       | XP_017305921.1 | 151  |
| 108254936 | c21h1orf50   | XP_017305925.1 | 189  |
| 108254962 | LOC108254962 | XP_017305995.1 | 284  |
| 108254989 | fam213b      | XP_017306033.1 | 176  |
| 108254990 | LOC108254990 | XP_017306034.1 | 125  |
| 108254996 | LOC108254996 | XP_017306041.1 | 146  |
| 108255031 | ghrh         | XP_017306121.1 | 163  |
| 108255055 | LOC108255055 | XP_017306185.1 | 1006 |
| 108255058 | shisa5       | XP_017306191.1 | 237  |
| 108255082 | rpp14        | XP_017306230.1 | 170  |
| 108255096 | traip        | XP_017306253.1 | 455  |
| 108255119 | svbp         | XP_017306296.1 | 66   |
| 108255122 | LOC108255122 | XP_017306301.1 | 203  |
| 108255135 | c21h6orf89   | XP_017306337.1 | 282  |
| 108255139 | LOC108255139 | XP_017306343.1 | 169  |
| 108255147 | ccdc51       | XP_017306352.1 | 416  |
| 108255149 | tma7         | XP_017306355.1 | 64   |
| 108255216 | timm17a      | XP_017306477.1 | 166  |
| 108255220 | LOC108255220 | XP_017306486.1 | 714  |
| 108255228 | LOC108255228 | XP_017306532.1 | 147  |
| 108255235 | LOC108255235 | XP_017306540.1 | 369  |
| 108255243 | coil         | XP_017306556.1 | 659  |
| 108255267 | LOC108255267 | XP_017306591.1 | 310  |
| 108255287 | c21h1orf116  | XP_017306640.1 | 390  |
| 108255299 | pdrg1        | XP_017306661.1 | 132  |
| 108255335 | zc3h14       | XP_017306735.1 | 657  |
| 108255369 | LOC108255369 | XP_017306787.1 | 349  |
| 108255377 | LOC108255377 | XP_017306803.1 | 299  |
| 108255378 | LOC108255378 | XP_017306805.1 | 295  |
| 108255387 | LOC108255387 | XP_017306816.1 | 175  |
| 108255407 | lrrc43       | XP_017306835.1 | 582  |

|           |              |                |      |
|-----------|--------------|----------------|------|
| 108255432 | mvk          | XP_017306861.1 | 399  |
| 108255462 | LOC108255462 | XP_017306888.1 | 90   |
| 108255481 | LOC108255481 | XP_017306911.1 | 81   |
| 108255492 | arsk         | XP_017306939.1 | 449  |
| 108255512 | sdf211       | XP_017306997.1 | 167  |
| 108255545 | gtf2h2c      | XP_017307048.1 | 274  |
| 108255569 | ccdc125      | XP_017307116.1 | 471  |
| 108255592 | gatc         | XP_017307164.1 | 215  |
| 108255639 | stpg2        | XP_017307223.1 | 555  |
| 108255757 | LOC108255757 | XP_017307436.1 | 172  |
| 108255767 | ccdc180      | XP_017307454.1 | 1461 |
| 108255780 | LOC108255780 | XP_017307475.1 | 103  |
| 108255781 | LOC108255781 | XP_017307476.1 | 101  |
| 108255808 | arl6ip4      | XP_017307546.1 | 253  |
| 108255874 | c22h2orf81   | XP_017307686.1 | 220  |
| 108255880 | emb          | XP_017307704.1 | 279  |
| 108255899 | c22h9orf135  | XP_017307738.1 | 189  |
| 108255906 | psmd9        | XP_017307757.1 | 213  |
| 108255927 | naaa         | XP_017307788.1 | 365  |
| 108255932 | c22h12orf49  | XP_017307797.1 | 199  |
| 108255941 | ccdc60       | XP_017307816.1 | 561  |
| 108255954 | LOC108255954 | XP_017307846.1 | 186  |
| 108255955 | acad10       | XP_017307848.1 | 586  |
| 108256047 | tmem116      | XP_017308025.1 | 358  |
| 108256051 | ndufs4       | XP_017308033.1 | 208  |
| 108256053 | coq5         | XP_017308036.1 | 326  |
| 108256075 | sra1         | XP_017308081.1 | 230  |
| 108256082 | cmtm7        | XP_017308109.1 | 165  |
| 108256097 | commd3       | XP_017308136.1 | 195  |
| 108256100 | LOC108256100 | XP_017308140.1 | 122  |
| 108256113 | evc          | XP_017308177.1 | 823  |
| 108256129 | LOC108256129 | XP_017308183.1 | 305  |
| 108256135 | LOC108256135 | XP_017308191.1 | 157  |
| 108256187 | LOC108256187 | XP_017308278.1 | 252  |
| 108256193 | bola1        | XP_017308293.1 | 150  |
| 108256195 | apoa2        | XP_017308295.1 | 133  |
| 108256218 | eef1e1       | XP_017308336.1 | 173  |
| 108256258 | LOC108256258 | XP_017308395.1 | 322  |
| 108256264 | gpatch3      | XP_017308407.1 | 514  |
| 108256291 | ubxn11       | XP_017308456.1 | 472  |
| 108256306 | LOC108256306 | XP_017308488.1 | 162  |
| 108256311 | LOC108256311 | XP_017308506.1 | 199  |
| 108256382 | LOC108256382 | XP_017308673.1 | 214  |
| 108256418 | LOC108256418 | XP_017308760.1 | 249  |
| 108256435 | zc2hc1a      | XP_017308798.1 | 296  |

|           |              |                |      |
|-----------|--------------|----------------|------|
| 108256447 | yae1d1       | XP_017308830.1 | 221  |
| 108256495 | mcmdc2       | XP_017308914.1 | 673  |
| 108256572 | LOC108256572 | XP_017309088.1 | 206  |
| 108256623 | ropn1l       | XP_017309172.1 | 215  |
| 108256628 | dap          | XP_017309178.1 | 106  |
| 108256635 | otos         | XP_017309188.1 | 90   |
| 108256676 | acot9        | XP_017309270.1 | 419  |
| 108256685 | LOC108256685 | XP_017309298.1 | 217  |
| 108256722 | hmgn2        | XP_017309368.1 | 77   |
| 108256723 | LOC108256723 | XP_017309370.1 | 372  |
| 108256762 | shfm1        | XP_017309457.1 | 70   |
| 108256765 | LOC108256765 | XP_017309460.1 | 209  |
| 108256780 | mgmt         | XP_017309478.1 | 181  |
| 108256787 | mrpl53       | XP_017309490.1 | 107  |
| 108256811 | LOC108256811 | XP_017309524.1 | 159  |
| 108256834 | LOC108256834 | XP_017309546.1 | 188  |
| 108256835 | LOC108256835 | XP_017309547.1 | 188  |
| 108256837 | LOC108256837 | XP_017309549.1 | 172  |
| 108256863 | LOC108256863 | XP_017309575.1 | 225  |
| 108256890 | mrpl12       | XP_017309630.1 | 194  |
| 108256894 | vwa3a        | XP_017309634.1 | 1145 |
| 108256922 | snrpd1       | XP_017309693.1 | 119  |
| 108256952 | LOC108256952 | XP_017309753.1 | 211  |
| 108256955 | nkain1       | XP_017309760.1 | 212  |
| 108256969 | syce1        | XP_017309777.1 | 205  |
| 108256972 | LOC108256972 | XP_017309794.1 | 152  |
| 108256989 | lyrm2        | XP_017309831.1 | 88   |
| 108257029 | cap1         | XP_017309902.1 | 469  |
| 108257046 | LOC108257046 | XP_017309935.1 | 428  |
| 108257066 | LOC108257066 | XP_017309962.1 | 193  |
| 108257098 | rmi2         | XP_017310004.1 | 146  |
| 108257119 | pet100       | XP_017310061.1 | 78   |
| 108257163 | batf3        | XP_017310155.1 | 113  |
| 108257166 | pithd1       | XP_017310168.1 | 210  |
| 108257169 | wdyhv1       | XP_017310173.1 | 188  |
| 108257170 | LOC108257170 | XP_017310176.1 | 83   |
| 108257185 | aunip        | XP_017310200.1 | 413  |
| 108257189 | LOC108257189 | XP_017310214.1 | 593  |
| 108257244 | snx8         | XP_017310333.1 | 520  |
| 108257259 | LOC108257259 | XP_017310371.1 | 217  |
| 108257301 | mrpl9        | XP_017310438.1 | 247  |
| 108257309 | polr2k       | XP_017310458.1 | 63   |
| 108257344 | LOC108257344 | XP_017310513.1 | 219  |
| 108257350 | rbm48        | XP_017310525.1 | 367  |
| 108257358 | gfer         | XP_017310540.1 | 179  |

|           |              |                |      |
|-----------|--------------|----------------|------|
| 108257365 | LOC108257365 | XP_017310553.1 | 478  |
| 108257386 | bud31        | XP_017310608.1 | 144  |
| 108257403 | LOC108257403 | XP_017310634.1 | 126  |
| 108257415 | jtb          | XP_017310659.1 | 150  |
| 108257427 | LOC108257427 | XP_017310671.1 | 73   |
| 108257430 | LOC108257430 | XP_017310678.1 | 339  |
| 108257509 | spaca6       | XP_017311013.1 | 310  |
| 108257527 | LOC108257527 | XP_017310880.1 | 285  |
| 108257534 | LOC108257534 | XP_017310886.1 | 181  |
| 108257571 | nkain2       | XP_017310941.1 | 206  |
| 108257612 | LOC108257612 | XP_017311006.1 | 218  |
| 108257636 | LOC108257636 | XP_017311042.1 | 257  |
| 108257650 | c25h2orf70   | XP_017311055.1 | 159  |
| 108257670 | LOC108257670 | XP_017311089.1 | 687  |
| 108257682 | cgrf1        | XP_017311107.1 | 249  |
| 108257760 | LOC108257760 | XP_017311258.1 | 720  |
| 108257781 | fgfr1op      | XP_017311303.1 | 468  |
| 108257807 | LOC108257807 | XP_017311356.1 | 247  |
| 108257816 | psk9         | XP_017311375.1 | 667  |
| 108257832 | LOC108257832 | XP_017311393.1 | 109  |
| 108257834 | LOC108257834 | XP_017311397.1 | 79   |
| 108257842 | LOC108257842 | XP_017311419.1 | 202  |
| 108257849 | c25h14orf2   | XP_017311428.1 | 54   |
| 108257867 | tmem244      | XP_017311461.1 | 174  |
| 108257882 | pln          | XP_017311492.1 | 52   |
| 108257908 | aasdh        | XP_017311543.1 | 1157 |
| 108257921 | nmu          | XP_017311564.1 | 156  |
| 108257923 | lexm         | XP_017311566.1 | 337  |
| 108257959 | LOC108257959 | XP_017311629.1 | 666  |
| 108257970 | aven         | XP_017311646.1 | 342  |
| 108257986 | LOC108257986 | XP_017311678.1 | 92   |
| 108257996 | ttc32        | XP_017311695.1 | 189  |
| 108258021 | LOC108258021 | XP_017311744.1 | 146  |
| 108258054 | cebzos       | XP_017311809.1 | 129  |
| 108258098 | dnaaf5       | XP_017311966.1 | 834  |
| 108258106 | pfas         | XP_017311977.1 | 1317 |
| 108258115 | LOC108258115 | XP_017312002.1 | 242  |
| 108258116 | saysd1       | XP_017311999.1 | 164  |
| 108258128 | c25h12orf57  | XP_017312026.1 | 122  |
| 108258156 | LOC108258156 | XP_017312095.1 | 296  |
| 108258157 | katnbl1      | XP_017312100.1 | 246  |
| 108258242 | thegl        | XP_017312264.1 | 240  |
| 108258312 | cenpk        | XP_017312347.1 | 272  |
| 108258329 | cyyr1        | XP_017312374.1 | 157  |
| 108258353 | fastkd2      | XP_017312413.1 | 641  |

|           |              |                |      |
|-----------|--------------|----------------|------|
| 108258406 | brat1        | XP_017312506.1 | 560  |
| 108258418 | mycbpap      | XP_017312516.1 | 836  |
| 108258440 | LOC108258440 | XP_017312563.1 | 444  |
| 108258448 | knop1        | XP_017312582.1 | 370  |
| 108258451 | LOC108258451 | XP_017312586.1 | 366  |
| 108258468 | ndufb7       | XP_017312617.1 | 121  |
| 108258469 | c26h19orf53  | XP_017312618.1 | 102  |
| 108258509 | spp2         | XP_017312686.1 | 187  |
| 108258514 | smim13       | XP_017312693.1 | 88   |
| 108258548 | LOC108258548 | XP_017312736.1 | 205  |
| 108258585 | nthl1        | XP_017312785.1 | 486  |
| 108258597 | tmco3        | XP_017312805.1 | 672  |
| 108258632 | LOC108258632 | XP_017312886.1 | 658  |
| 108258635 | pcnp         | XP_017312889.1 | 157  |
| 108258639 | LOC108258639 | XP_017312898.1 | 365  |
| 108258647 | LOC108258647 | XP_017312912.1 | 190  |
| 108258669 | ndufab1      | XP_017312958.1 | 153  |
| 108258673 | pibf1        | XP_017312962.1 | 666  |
| 108258685 | LOC108258685 | XP_017312976.1 | 293  |
| 108258694 | sugt1        | XP_017312997.1 | 325  |
| 108258709 | LOC108258709 | XP_017313029.1 | 105  |
| 108258723 | b3gntl1      | XP_017313051.1 | 558  |
| 108258728 | gtf3c1       | XP_017313057.1 | 2027 |
| 108258771 | thumpd1      | XP_017313161.1 | 415  |
| 108258818 | LOC108258818 | XP_017313252.1 | 167  |
| 108258880 | LOC108258880 | XP_017313343.1 | 124  |
| 108258903 | LOC108258903 | XP_017313388.1 | 536  |
| 108258907 | LOC108258907 | XP_017313395.1 | 1377 |
| 108258909 | c26hxorf38   | XP_017313402.1 | 310  |
| 108258993 | tmsb4x       | XP_017313580.1 | 43   |
| 108259008 | ubac2        | XP_017313601.1 | 342  |
| 108259068 | rnf175       | XP_017313702.1 | 301  |
| 108259078 | c26h1orf100  | XP_017313733.1 | 137  |
| 108259079 | obfc1        | XP_017313738.1 | 316  |
| 108259081 | LOC108259081 | XP_017313745.1 | 330  |
| 108259085 | LOC108259085 | XP_017313746.1 | 236  |
| 108259140 | LOC108259140 | XP_017313853.1 | 463  |
| 108259167 | LOC108259167 | XP_017313919.1 | 208  |
| 108259176 | LOC108259176 | XP_017313895.1 | 702  |
| 108259225 | bean1        | XP_017313982.1 | 197  |
| 108259236 | cnep1r1      | XP_017314006.1 | 125  |
| 108259247 | LOC108259247 | XP_017314025.1 | 272  |
| 108259250 | LOC108259250 | XP_017314030.1 | 227  |
| 108259251 | LOC108259251 | XP_017314031.1 | 218  |
| 108259274 | LOC108259274 | XP_017314085.1 | 252  |

|           |              |                |     |
|-----------|--------------|----------------|-----|
| 108259323 | mcee         | XP_017314193.1 | 175 |
| 108259366 | hypk         | XP_017314279.1 | 127 |
| 108259434 | LOC108259434 | XP_017314441.1 | 312 |
| 108259442 | tmem186      | XP_017314451.1 | 224 |
| 108259472 | muc15        | XP_017314477.1 | 347 |
| 108259531 | LOC108259531 | XP_017314609.1 | 266 |
| 108259535 | LOC108259535 | XP_017314608.1 | 195 |
| 108259542 | LOC108259542 | XP_017314619.1 | 131 |
| 108259605 | LOC108259605 | XP_017314715.1 | 231 |
| 108259607 | LOC108259607 | XP_017314717.1 | 199 |
| 108259617 | LOC108259617 | XP_017314735.1 | 190 |
| 108259684 | fam96b       | XP_017314833.1 | 159 |
| 108259693 | cdca5        | XP_017314865.1 | 262 |
| 108259696 | pigw         | XP_017314873.1 | 491 |
| 108259741 | LOC108259741 | XP_017314949.1 | 370 |
| 108259751 | spag8        | XP_017314967.1 | 189 |
| 108259753 | LOC108259753 | XP_017314969.1 | 224 |
| 108259760 | LOC108259760 | XP_017314975.1 | 121 |
| 108259773 | lrwd1        | XP_017314987.1 | 806 |
| 108259817 | igbp1        | XP_017315025.1 | 349 |
| 108259819 | fam76b       | XP_017315027.1 | 312 |
| 108259820 | LOC108259820 | XP_017315029.1 | 290 |
| 108259838 | las1l        | XP_017315044.1 | 573 |
| 108259872 | cenpv        | XP_017315124.1 | 154 |
| 108259903 | LOC108259903 | XP_017315187.1 | 355 |
| 108259909 | vma21        | XP_017315195.1 | 104 |
| 108259925 | LOC108259925 | XP_017315227.1 | 747 |
| 108259938 | LOC108259938 | XP_017315250.1 | 154 |
| 108259939 | LOC108259939 | XP_017315251.1 | 80  |
| 108259940 | LOC108259940 | XP_017315252.1 | 78  |
| 108259966 | c28h11orf1   | XP_017315314.1 | 168 |
| 108259982 | znf653       | XP_017315381.1 | 544 |
| 108259990 | LOC108259990 | XP_017315359.1 | 175 |
| 108259991 | LOC108259991 | XP_017315363.1 | 177 |
| 108259992 | LOC108259992 | XP_017315364.1 | 78  |
| 108260003 | alkbh6       | XP_017315390.1 | 234 |
| 108260037 | LOC108260037 | XP_017315450.1 | 95  |
| 108260049 | ssna1        | XP_017315475.1 | 118 |
| 108260077 | LOC108260077 | XP_017315523.1 | 143 |
| 108260082 | surf4        | XP_017315527.1 | 269 |
| 108260085 | tmem248      | XP_017315532.1 | 315 |
| 108260112 | LOC108260112 | XP_017315588.1 | 335 |
| 108260130 | LOC108260130 | XP_017315692.1 | 323 |
| 108260135 | kiaa0141     | XP_017315665.1 | 485 |
| 108260174 | LOC108260174 | XP_017315736.1 | 289 |



|           |              |                |     |
|-----------|--------------|----------------|-----|
| 108260178 | LOC108260178 | XP_017315741.1 | 258 |
| 108260186 | spag7        | XP_017315755.1 | 228 |
| 108260191 | LOC108260191 | XP_017315768.1 | 203 |
| 108260199 | LOC108260199 | XP_017315780.1 | 170 |
| 108260225 | alkbh7       | XP_017315802.1 | 250 |
| 108260245 | LOC108260245 | XP_017315837.1 | 139 |
| 108260247 | LOC108260247 | XP_017315882.1 | 104 |
| 108260262 | hsf5         | XP_017315870.1 | 349 |
| 108260266 | ptcd2        | XP_017315880.1 | 383 |
| 108260267 | ttc33        | XP_017315884.1 | 262 |
| 108260287 | LOC108260287 | XP_017315918.1 | 59  |
| 108260299 | prkrip1      | XP_017315949.1 | 189 |
| 108260306 | LOC108260306 | XP_017315966.1 | 307 |
| 108260307 | LOC108260307 | XP_017316009.1 | 957 |
| 108260360 | aif11        | XP_017316091.1 | 148 |
| 108260394 | rogdi        | XP_017316154.1 | 300 |
| 108260397 | LOC108260397 | XP_017316153.1 | 169 |
| 108260453 | dpm2         | XP_017316255.1 | 83  |
| 108260455 | ccdc15       | XP_017316258.1 | 483 |
| 108260475 | tsen54       | XP_017316300.1 | 496 |
| 108260515 | LOC108260515 | XP_017316370.1 | 291 |
| 108260518 | LOC108260518 | XP_017316374.1 | 322 |
| 108260523 | LOC108260523 | XP_017316399.1 | 238 |
| 108260524 | LOC108260524 | XP_017316400.1 | 238 |
| 108260525 | LOC108260525 | XP_017316401.1 | 226 |
| 108260529 | LOC108260529 | XP_017316404.1 | 97  |
| 108260543 | LOC108260543 | XP_017316415.1 | 270 |
| 108260555 | smim18       | XP_017316430.1 | 126 |
| 108260576 | LOC108260576 | XP_017316449.1 | 559 |
| 108260589 | LOC108260589 | XP_017316464.1 | 645 |
| 108260594 | LOC108260594 | XP_017316473.1 | 276 |
| 108260595 | LOC108260595 | XP_017316476.1 | 295 |
| 108260596 | LOC108260596 | XP_017316480.1 | 237 |
| 108260598 | LOC108260598 | XP_017316485.1 | 873 |
| 108260607 | LOC108260607 | XP_017316512.1 | 511 |
| 108260672 | LOC108260672 | XP_017316597.1 | 224 |
| 108260679 | LOC108260679 | XP_017316606.1 | 91  |
| 108260684 | gne          | XP_017316613.1 | 737 |
| 108260685 | LOC108260685 | XP_017316616.1 | 674 |
| 108260695 | c29h4orf33   | XP_017316633.1 | 197 |
| 108260699 | LOC108260699 | XP_017316636.1 | 218 |
| 108260701 | LOC108260701 | XP_017316639.1 | 224 |
| 108260722 | smim14       | XP_017316683.1 | 103 |
| 108260727 | LOC108260727 | XP_017316700.1 | 170 |
| 108260731 | c2h1orf131   | XP_017316709.1 | 255 |

|           |              |                |     |
|-----------|--------------|----------------|-----|
| 108260732 | clhc1        | XP_017316708.1 | 587 |
| 108260777 | asah1        | XP_017316818.1 | 393 |
| 108260828 | memo1        | XP_017316937.1 | 295 |
| 108260846 | cfap97       | XP_017316982.1 | 489 |
| 108260849 | ociad1       | XP_017316987.1 | 231 |
| 108260857 | LOC108260857 | XP_017316995.1 | 232 |
| 108260867 | LOC108260867 | XP_017317017.1 | 105 |
| 108260901 | LOC108260901 | XP_017317095.1 | 275 |
| 108260909 | apela        | XP_017317109.1 | 54  |
| 108260910 | LOC108260910 | XP_017317113.1 | 169 |
| 108260935 | LOC108260935 | XP_017317156.1 | 120 |
| 108260956 | cfap36       | XP_017317193.1 | 364 |
| 108260961 | natd1        | XP_017317205.1 | 110 |
| 108261080 | fbxo47       | XP_017317430.1 | 228 |
| 108261105 | LOC108261105 | XP_017317475.1 | 160 |
| 108261133 | cops8        | XP_017317496.1 | 191 |
| 108261138 | LOC108261138 | XP_017317508.1 | 361 |
| 108261139 | LOC108261139 | XP_017317509.1 | 328 |
| 108261140 | LOC108261140 | XP_017317512.1 | 321 |
| 108261202 | LOC108261202 | XP_017317572.1 | 99  |
| 108261206 | LOC108261206 | XP_017317588.1 | 205 |
| 108261220 | LOC108261220 | XP_017317634.1 | 192 |
| 108261238 | LOC108261238 | XP_017317619.1 | 274 |
| 108261275 | LOC108261275 | XP_017317672.1 | 119 |
| 108261285 | LOC108261285 | XP_017317680.1 | 240 |
| 108261332 | LOC108261332 | XP_017317728.1 | 122 |
| 108261389 | LOC108261389 | XP_017317773.1 | 287 |
| 108261405 | LOC108261405 | XP_017317784.1 | 285 |
| 108261432 | LOC108261432 | XP_017317816.1 | 219 |
| 108261485 | LOC108261485 | XP_017317843.1 | 226 |
| 108261486 | LOC108261486 | XP_017317845.1 | 203 |
| 108261511 | LOC108261511 | XP_017317859.1 | 83  |
| 108261543 | LOC108261543 | XP_017317882.1 | 323 |
| 108261591 | LOC108261591 | XP_017317914.1 | 307 |
| 108261642 | LOC108261642 | XP_017317951.1 | 101 |
| 108261655 | LOC108261655 | XP_017317962.1 | 180 |
| 108261657 | LOC108261657 | XP_017317963.1 | 209 |
| 108261661 | LOC108261661 | XP_017317972.1 | 271 |
| 108261695 | LOC108261695 | XP_017317996.1 | 219 |
| 108261706 | LOC108261706 | XP_017318007.1 | 296 |
| 108261723 | LOC108261723 | XP_017318019.1 | 95  |
| 108261749 | LOC108261749 | XP_017318040.1 | 226 |
| 108261754 | c1h8orf88    | XP_017318099.1 | 125 |
| 108261769 | LOC108261769 | XP_017318052.1 | 446 |
| 108261801 | LOC108261801 | XP_017318066.1 | 178 |

|           |              |                |      |
|-----------|--------------|----------------|------|
| 108261817 | LOC108261817 | XP_017318072.1 | 161  |
| 108261820 | LOC108261820 | XP_017318074.1 | 231  |
| 108261826 | LOC108261826 | XP_017318078.1 | 122  |
| 108261863 | LOC108261863 | XP_017318117.1 | 137  |
| 108262000 | LOC108262000 | XP_017318188.1 | 241  |
| 108262034 | LOC108262034 | XP_017318209.1 | 169  |
| 108262041 | LOC108262041 | XP_017318214.1 | 151  |
| 108262248 | LOC108262248 | XP_017318307.1 | 462  |
| 108262276 | LOC108262276 | XP_017318316.1 | 91   |
| 108262318 | LOC108262318 | XP_017318337.1 | 172  |
| 108262356 | LOC108262356 | XP_017318352.1 | 255  |
| 108262380 | LOC108262380 | XP_017318362.1 | 96   |
| 108262473 | LOC108262473 | XP_017318405.1 | 252  |
| 108262561 | LOC108262561 | XP_017318440.1 | 211  |
| 108262581 | lect2        | XP_017318445.1 | 158  |
| 108262582 | LOC108262582 | XP_017318447.1 | 124  |
| 108262588 | LOC108262588 | XP_017318449.1 | 262  |
| 108262600 | LOC108262600 | XP_017318457.1 | 288  |
| 108262645 | LOC108262645 | XP_017318476.1 | 284  |
| 108262656 | LOC108262656 | XP_017318482.1 | 85   |
| 108262726 | LOC108262726 | XP_017318516.1 | 294  |
| 108262746 | LOC108262746 | XP_017318532.1 | 147  |
| 108262768 | LOC108262768 | XP_017318560.1 | 1409 |
| 108262770 | LOC108262770 | XP_017318578.1 | 257  |
| 108262779 | LOC108262779 | XP_017318597.1 | 633  |
| 108262785 | LOC108262785 | XP_017318604.1 | 474  |
| 108262798 | LOC108262798 | XP_017318627.1 | 189  |
| 108262802 | LOC108262802 | XP_017318633.1 | 201  |
| 108262803 | LOC108262803 | XP_017318634.1 | 161  |
| 108262805 | pold4        | XP_017318636.1 | 112  |
| 108262869 | tmem72       | XP_017318714.1 | 207  |
| 108262878 | LOC108262878 | XP_017318722.1 | 574  |
| 108262883 | LOC108262883 | XP_017318726.1 | 223  |
| 108262889 | LOC108262889 | XP_017318731.1 | 136  |
| 108262892 | LOC108262892 | XP_017318734.1 | 317  |
| 108262894 | sprn         | XP_017318735.1 | 137  |
| 108262926 | LOC108262926 | XP_017318764.1 | 413  |
| 108262965 | LOC108262965 | XP_017318815.1 | 264  |
| 108262977 | LOC108262977 | XP_017318821.1 | 158  |
| 108262984 | nusap1       | XP_017318830.1 | 446  |
| 108263026 | LOC108263026 | XP_017318894.1 | 137  |
| 108263033 | c3h6orf118   | XP_017318923.1 | 387  |
| 108263058 | LOC108263058 | XP_017318968.1 | 196  |
| 108263074 | LOC108263074 | XP_017319005.1 | 125  |
| 108263086 | trmt5        | XP_017319020.1 | 491  |

|           |              |                |      |
|-----------|--------------|----------------|------|
| 108263118 | LOC108263118 | XP_017319089.1 | 195  |
| 108263125 | LOC108263125 | XP_017319105.1 | 132  |
| 108263132 | tmem14a      | XP_017319114.1 | 99   |
| 108263138 | LOC108263138 | XP_017319123.1 | 127  |
| 108263158 | c3h7orf72    | XP_017319166.1 | 382  |
| 108263195 | LOC108263195 | XP_017319244.1 | 253  |
| 108263201 | LOC108263201 | XP_017319263.1 | 110  |
| 108263212 | rsrp1        | XP_017319281.1 | 319  |
| 108263232 | LOC108263232 | XP_017319341.1 | 106  |
| 108263240 | mavs         | XP_017319351.1 | 703  |
| 108263281 | atp5s        | XP_017319424.1 | 174  |
| 108263348 | spef1        | XP_017319533.1 | 232  |
| 108263353 | sdhaf4       | XP_017319548.1 | 111  |
| 108263360 | tmem134      | XP_017319560.1 | 206  |
| 108263364 | supv3l1      | XP_017319565.1 | 764  |
| 108263367 | LOC108263367 | XP_017319588.1 | 297  |
| 108263388 | LOC108263388 | XP_017319609.1 | 287  |
| 108263411 | b3galnt2     | XP_017319649.1 | 375  |
| 108263412 | cacul1       | XP_017319651.1 | 315  |
| 108263423 | pyroxd2      | XP_017319674.1 | 613  |
| 108263433 | commd8       | XP_017319691.1 | 198  |
| 108263516 | zcchc24      | XP_017319887.1 | 238  |
| 108263520 | malsu1       | XP_017319894.1 | 237  |
| 108263525 | LOC108263525 | XP_017319907.1 | 152  |
| 108263584 | ap5s1        | XP_017320039.1 | 202  |
| 108263629 | spcs3        | XP_017320140.1 | 180  |
| 108263633 | LOC108263633 | XP_017320151.1 | 145  |
| 108263697 | LOC108263697 | XP_017320238.1 | 253  |
| 108263725 | urb2         | XP_017320285.1 | 1522 |
| 108263733 | srgn         | XP_017320300.1 | 148  |
| 108263754 | LOC108263754 | XP_017320354.1 | 91   |
| 108263759 | tmem254      | XP_017320362.1 | 124  |
| 108263773 | spag5        | XP_017320395.1 | 1673 |
| 108263776 | uso1         | XP_017320401.1 | 963  |
| 108263827 | LOC108263827 | XP_017320482.1 | 605  |
| 108263836 | LOC108263836 | XP_017320500.1 | 200  |
| 108263844 | pus3         | XP_017320531.1 | 403  |
| 108263892 | LOC108263892 | XP_017320595.1 | 66   |
| 108263893 | il34         | XP_017320597.1 | 211  |
| 108263954 | LOC108263954 | XP_017320675.1 | 213  |
| 108263963 | LOC108263963 | XP_017320691.1 | 269  |
| 108263999 | LOC108263999 | XP_017320756.1 | 237  |
| 108264008 | treh         | XP_017320782.1 | 494  |
| 108264013 | LOC108264013 | XP_017320798.1 | 414  |
| 108264015 | LOC108264015 | XP_017320801.1 | 314  |

|           |              |                |      |
|-----------|--------------|----------------|------|
| 108264030 | LOC108264030 | XP_017320810.1 | 807  |
| 108264043 | LOC108264043 | XP_017320838.1 | 124  |
| 108264051 | LOC108264051 | XP_017320847.1 | 701  |
| 108264064 | lrriq1       | XP_017320859.1 | 1667 |
| 108264074 | LOC108264074 | XP_017320867.1 | 246  |
| 108264080 | LOC108264080 | XP_017320872.1 | 309  |
| 108264144 | c4h15orf65   | XP_017320937.1 | 126  |
| 108264161 | bbs10        | XP_017320968.1 | 594  |
| 108264169 | LOC108264169 | XP_017320982.1 | 357  |
| 108264185 | LOC108264185 | XP_017321006.1 | 229  |
| 108264190 | ndufa3       | XP_017321015.1 | 123  |
| 108264194 | LOC108264194 | XP_017321016.1 | 138  |
| 108264211 | LOC108264211 | XP_017321034.1 | 144  |
| 108264219 | nts          | XP_017321039.1 | 157  |
| 108264233 | LOC108264233 | XP_017321056.1 | 118  |
| 108264237 | cenpn        | XP_017321062.1 | 313  |
| 108264238 | cmc2         | XP_017321063.1 | 78   |
| 108264245 | gins2        | XP_017321080.1 | 186  |
| 108264257 | LOC108264257 | XP_017321092.1 | 151  |
| 108264300 | LOC108264300 | XP_017321199.1 | 199  |
| 108264329 | LOC108264329 | XP_017321260.1 | 195  |
| 108264395 | pex16        | XP_017321360.1 | 339  |
| 108264412 | cetp         | XP_017321397.1 | 496  |
| 108264425 | clsrp        | XP_017321415.1 | 637  |
| 108264437 | pigb         | XP_017321446.1 | 531  |
| 108264448 | tsr3         | XP_017321483.1 | 298  |
| 108264460 | c4h15orf61   | XP_017321502.1 | 156  |
| 108264496 | dtwd1        | XP_017321582.1 | 324  |
| 108264498 | LOC108264498 | XP_017321589.1 | 212  |
| 108264501 | LOC108264501 | XP_017321593.1 | 202  |
| 108264504 | bloc1s6      | XP_017321601.1 | 163  |
| 108264507 | fam103a1     | XP_017321606.1 | 82   |
| 108264508 | cdc42se2     | XP_017321607.1 | 75   |
| 108264532 | LOC108264532 | XP_017321624.1 | 112  |
| 108264533 | LOC108264533 | XP_017321625.1 | 112  |
| 108264555 | LOC108264555 | XP_017321671.1 | 101  |
| 108264585 | LOC108264585 | XP_017321723.1 | 186  |
| 108264601 | bcl2l13      | XP_017321774.1 | 603  |
| 108264602 | LOC108264602 | XP_017321778.1 | 199  |
| 108264645 | reln         | XP_017321864.1 | 3479 |
| 108264646 | LOC108264646 | XP_017321865.1 | 204  |
| 108264685 | LOC108264685 | XP_017321935.1 | 148  |
| 108264699 | LOC108264699 | XP_017321948.1 | 348  |
| 108264700 | LOC108264700 | XP_017321955.1 | 188  |
| 108264701 | LOC108264701 | XP_017321956.1 | 278  |

|           |              |                |      |
|-----------|--------------|----------------|------|
| 108264702 | LOC108264702 | XP_017321957.1 | 251  |
| 108264703 | LOC108264703 | XP_017321959.1 | 203  |
| 108264781 | trabd        | XP_017322130.1 | 359  |
| 108264797 | LOC108264797 | XP_017322159.1 | 1448 |
| 108264813 | siae         | XP_017322201.1 | 538  |
| 108264830 | LOC108264830 | XP_017322227.1 | 171  |
| 108264832 | LOC108264832 | XP_017322230.1 | 183  |
| 108264899 | anapc5       | XP_017322365.1 | 762  |
| 108264909 | tmem241      | XP_017322401.1 | 271  |
| 108264910 | hps4         | XP_017322388.1 | 532  |
| 108264913 | LOC108264913 | XP_017322399.1 | 424  |
| 108264926 | c5h12orf43   | XP_017322424.1 | 242  |
| 108264931 | LOC108264931 | XP_017322428.1 | 225  |
| 108264934 | LOC108264934 | XP_017322432.1 | 219  |
| 108264941 | LOC108264941 | XP_017322439.1 | 109  |
| 108265008 | LOC108265008 | XP_017322550.1 | 280  |
| 108265034 | nppa         | XP_017322593.1 | 131  |
| 108265041 | exosc10      | XP_017322612.1 | 900  |
| 108265067 | LOC108265067 | XP_017322645.1 | 251  |
| 108265075 | c5h6orf226   | XP_017322659.1 | 147  |
| 108265095 | LOC108265095 | XP_017322697.1 | 324  |
| 108265099 | LOC108265099 | XP_017322700.1 | 301  |
| 108265117 | izumo1       | XP_017322730.1 | 376  |
| 108265131 | lrriq3       | XP_017322753.1 | 595  |
| 108265146 | oxct1        | XP_017322772.1 | 509  |
| 108265149 | LOC108265149 | XP_017322774.1 | 234  |
| 108265200 | c5h1orf228   | XP_017322816.1 | 358  |
| 108265226 | LOC108265226 | XP_017322837.1 | 236  |
| 108265261 | LOC108265261 | XP_017322890.1 | 186  |
| 108265300 | LOC108265300 | XP_017322961.1 | 726  |
| 108265304 | gins4        | XP_017322969.1 | 225  |
| 108265306 | LOC108265306 | XP_017322993.1 | 625  |
| 108265323 | sap30bp      | XP_017323003.1 | 304  |
| 108265342 | LOC108265342 | XP_017323047.1 | 482  |
| 108265350 | LOC108265350 | XP_017323076.1 | 472  |
| 108265359 | LOC108265359 | XP_017323096.1 | 459  |
| 108265372 | mrps36       | XP_017323112.1 | 180  |
| 108265397 | chmp7        | XP_017323157.1 | 443  |
| 108265418 | lrif1        | XP_017323192.1 | 917  |
| 108265449 | stkld1       | XP_017323263.1 | 523  |
| 108265464 | ndufb11      | XP_017323294.1 | 149  |
| 108265476 | renbp        | XP_017323315.1 | 402  |
| 108265477 | LOC108265477 | XP_017323320.1 | 185  |
| 108265490 | apoc1        | XP_017323353.1 | 87   |
| 108265518 | gucd1        | XP_017323413.1 | 226  |

|           |              |                |     |
|-----------|--------------|----------------|-----|
| 108265560 | LOC108265560 | XP_017323532.1 | 183 |
| 108265563 | prok1        | XP_017323540.1 | 105 |
| 108265568 | LOC108265568 | XP_017323546.1 | 255 |
| 108265571 | pold2        | XP_017323551.1 | 467 |
| 108265585 | LOC108265585 | XP_017323593.1 | 423 |
| 108265586 | LOC108265586 | XP_017323595.1 | 379 |
| 108265588 | c5h5orf51    | XP_017323597.1 | 279 |
| 108265593 | tmco1        | XP_017323609.1 | 188 |
| 108265624 | LOC108265624 | XP_017323664.1 | 107 |
| 108265640 | LOC108265640 | XP_017323682.1 | 130 |
| 108265669 | timml7b      | XP_017323731.1 | 172 |
| 108265681 | LOC108265681 | XP_017323753.1 | 212 |
| 108265734 | gnrh1        | XP_017323861.1 | 104 |
| 108265776 | tmem252      | XP_017323950.1 | 178 |
| 108265832 | LOC108265832 | XP_017324062.1 | 286 |
| 108265860 | LOC108265860 | XP_017324133.1 | 189 |
| 108265906 | fance        | XP_017324237.1 | 509 |
| 108265952 | LOC108265952 | XP_017324329.1 | 77  |
| 108265953 | LOC108265953 | XP_017324330.1 | 247 |
| 108265975 | gkap1        | XP_017324369.1 | 347 |
| 108265979 | LOC108265979 | XP_017324377.1 | 531 |
| 108265986 | LOC108265986 | XP_017324386.1 | 197 |
| 108266019 | dmap1        | XP_017324444.1 | 463 |
| 108266026 | LOC108266026 | XP_017324497.1 | 158 |
| 108266038 | LOC108266038 | XP_017324473.1 | 424 |
| 108266044 | ocstamp      | XP_017324487.1 | 575 |
| 108266124 | LOC108266124 | XP_017324636.1 | 281 |
| 108266151 | ndp          | XP_017324677.1 | 138 |
| 108266154 | LOC108266154 | XP_017324681.1 | 206 |
| 108266253 | LOC108266253 | XP_017324831.1 | 253 |
| 108266266 | ccdc89       | XP_017324846.1 | 354 |
| 108266275 | LOC108266275 | XP_017324848.1 | 201 |
| 108266276 | LOC108266276 | XP_017324851.1 | 180 |
| 108266320 | LOC108266320 | XP_017324920.1 | 166 |
| 108266442 | LOC108266442 | XP_017325283.1 | 717 |
| 108266448 | LOC108266448 | XP_017325267.1 | 235 |
| 108266464 | LOC108266464 | XP_017325306.1 | 203 |
| 108266484 | LOC108266484 | XP_017325361.1 | 675 |
| 108266515 | LOC108266515 | XP_017325429.1 | 125 |
| 108266526 | gtdc1        | XP_017325449.1 | 409 |
| 108266537 | LOC108266537 | XP_017325475.1 | 63  |
| 108266547 | LOC108266547 | XP_017325506.1 | 123 |
| 108266550 | LOC108266550 | XP_017325508.1 | 245 |
| 108266569 | LOC108266569 | XP_017325546.1 | 511 |
| 108266593 | dnajc15      | XP_017325615.1 | 150 |

|           |              |                |      |
|-----------|--------------|----------------|------|
| 108266691 | cmssl        | XP_017325829.1 | 290  |
| 108266707 | LOC108266707 | XP_017325857.1 | 222  |
| 108266719 | LOC108266719 | XP_017325873.1 | 245  |
| 108266728 | serp2        | XP_017325886.1 | 65   |
| 108266731 | LOC108266731 | XP_017325891.1 | 108  |
| 108266781 | il11         | XP_017325999.1 | 195  |
| 108266784 | cd302        | XP_017326000.1 | 247  |
| 108266918 | nms          | XP_017326239.1 | 138  |
| 108266939 | LOC108266939 | XP_017326266.1 | 236  |
| 108266940 | LOC108266940 | XP_017326267.1 | 311  |
| 108266946 | LOC108266946 | XP_017326274.1 | 207  |
| 108267013 | lmln         | XP_017326374.1 | 655  |
| 108267040 | LOC108267040 | XP_017326417.1 | 323  |
| 108267042 | LOC108267042 | XP_017326422.1 | 192  |
| 108267095 | LOC108267095 | XP_017326553.1 | 214  |
| 108267131 | LOC108267131 | XP_017326595.1 | 91   |
| 108267133 | LOC108267133 | XP_017326596.1 | 90   |
| 108267154 | LOC108267154 | XP_017326631.1 | 341  |
| 108267168 | LOC108267168 | XP_017326645.1 | 331  |
| 108267181 | LOC108267181 | XP_017326661.1 | 95   |
| 108267189 | LOC108267189 | XP_017326671.1 | 239  |
| 108267198 | LOC108267198 | XP_017326688.1 | 391  |
| 108267209 | LOC108267209 | XP_017326702.1 | 366  |
| 108267224 | LOC108267224 | XP_017326707.1 | 223  |
| 108267263 | LOC108267263 | XP_017326742.1 | 195  |
| 108267271 | LOC108267271 | XP_017326753.1 | 371  |
| 108267281 | LOC108267281 | XP_017326782.1 | 323  |
| 108267283 | LOC108267283 | XP_017326784.1 | 272  |
| 108267285 | LOC108267285 | XP_017326787.1 | 263  |
| 108267289 | LOC108267289 | XP_017326797.1 | 264  |
| 108267346 | LOC108267346 | XP_017326878.1 | 242  |
| 108267376 | LOC108267376 | XP_017326900.1 | 85   |
| 108267378 | LOC108267378 | XP_017326897.1 | 353  |
| 108267379 | LOC108267379 | XP_017326898.1 | 351  |
| 108267380 | LOC108267380 | XP_017326899.1 | 310  |
| 108267390 | ccdc24       | XP_017326907.1 | 400  |
| 108267398 | LOC108267398 | XP_017326926.1 | 502  |
| 108267413 | LOC108267413 | XP_017326948.1 | 351  |
| 108267415 | fam159a      | XP_017326949.1 | 158  |
| 108267416 | tmem88       | XP_017326950.1 | 218  |
| 108267444 | sec62        | XP_017326999.1 | 393  |
| 108267488 | LOC108267488 | XP_017327074.1 | 165  |
| 108267509 | mettl17      | XP_017327107.1 | 459  |
| 108267516 | LOC108267516 | XP_017327122.1 | 2010 |
| 108267528 | LOC108267528 | XP_017327165.1 | 169  |



|           |              |                |      |
|-----------|--------------|----------------|------|
| 108267537 | majin        | XP_017327173.1 | 253  |
| 108267540 | batf2        | XP_017327178.1 | 165  |
| 108267541 | gpha2        | XP_017327179.1 | 135  |
| 108267547 | aadat        | XP_017327204.1 | 342  |
| 108267564 | LOC108267564 | XP_017327248.1 | 207  |
| 108267588 | zzz3         | XP_017327315.1 | 872  |
| 108267619 | c7h1orf123   | XP_017327359.1 | 160  |
| 108267658 | serp1        | XP_017327437.1 | 65   |
| 108267692 | LOC108267692 | XP_017327515.1 | 168  |
| 108267693 | rwdd4        | XP_017327521.1 | 186  |
| 108267714 | LOC108267714 | XP_017327548.1 | 124  |
| 108267721 | LOC108267721 | XP_017327558.1 | 189  |
| 108267727 | tkfc         | XP_017327575.1 | 616  |
| 108267746 | LOC108267746 | XP_017327616.1 | 101  |
| 108267766 | snapc2       | XP_017327666.1 | 409  |
| 108267767 | LOC108267767 | XP_017327667.1 | 321  |
| 108267771 | LOC108267771 | XP_017327675.1 | 293  |
| 108267833 | LOC108267833 | XP_017327773.1 | 189  |
| 108267856 | no17         | XP_017327813.1 | 211  |
| 108267873 | elp5         | XP_017327847.1 | 297  |
| 108267897 | LOC108267897 | XP_017327885.1 | 257  |
| 108267901 | smim20       | XP_017327891.1 | 68   |
| 108267947 | LOC108267947 | XP_017328036.1 | 285  |
| 108267949 | LOC108267949 | XP_017328039.1 | 1316 |
| 108267960 | poln         | XP_017328059.1 | 1192 |
| 108267971 | rgp1         | XP_017328073.1 | 386  |
| 108267988 | LOC108267988 | XP_017328099.1 | 91   |
| 108268026 | LOC108268026 | XP_017328153.1 | 240  |
| 108268037 | naa40        | XP_017328168.1 | 238  |
| 108268044 | wrnip1       | XP_017328193.1 | 511  |
| 108268072 | mettl12      | XP_017328248.1 | 215  |
| 108268101 | LOC108268101 | XP_017328293.1 | 413  |
| 108268114 | LOC108268114 | XP_017328323.1 | 99   |
| 108268196 | mblac1       | XP_017328500.1 | 218  |
| 108268244 | LOC108268244 | XP_017328602.1 | 584  |
| 108268283 | LOC108268283 | XP_017328636.1 | 309  |
| 108268284 | LOC108268284 | XP_017328639.1 | 249  |
| 108268302 | LOC108268302 | XP_017328674.1 | 95   |
| 108268303 | LOC108268303 | XP_017328676.1 | 101  |
| 108268304 | LOC108268304 | XP_017328678.1 | 95   |
| 108268310 | LOC108268310 | XP_017328690.1 | 526  |
| 108268323 | LOC108268323 | XP_017328708.1 | 213  |
| 108268332 | cd27         | XP_017328761.1 | 235  |
| 108268342 | haus6        | XP_017328742.1 | 792  |
| 108268344 | kiaa0040     | XP_017328749.1 | 111  |

|           |              |                |      |
|-----------|--------------|----------------|------|
| 108268384 | emg1         | XP_017328774.1 | 238  |
| 108268388 | cenpi        | XP_017328814.1 | 721  |
| 108268409 | pyurf        | XP_017328852.1 | 111  |
| 108268412 | m6pr         | XP_017328869.1 | 268  |
| 108268432 | fam185a      | XP_017328889.1 | 366  |
| 108268441 | LOC108268441 | XP_017328911.1 | 1057 |
| 108268449 | LOC108268449 | XP_017328925.1 | 188  |
| 108268450 | LOC108268450 | XP_017328929.1 | 181  |
| 108268454 | LOC108268454 | XP_017328933.1 | 99   |
| 108268456 | ecm1         | XP_017328944.1 | 669  |
| 108268463 | LOC108268463 | XP_017328953.1 | 349  |
| 108268479 | LOC108268479 | XP_017328988.1 | 335  |
| 108268486 | syce3        | XP_017328995.1 | 94   |
| 108268490 | LOC108268490 | XP_017328999.1 | 424  |
| 108268498 | LOC108268498 | XP_017329011.1 | 271  |
| 108268500 | LOC108268500 | XP_017329013.1 | 197  |
| 108268505 | c8hxor65     | XP_017329021.1 | 104  |
| 108268532 | LOC108268532 | XP_017329044.1 | 362  |
| 108268533 | slc30a9      | XP_017329045.1 | 1135 |
| 108268536 | rep15        | XP_017329049.1 | 224  |
| 108268543 | LOC108268543 | XP_017329053.1 | 100  |
| 108268582 | c8h5orf45    | XP_017329107.1 | 376  |
| 108268585 | LOC108268585 | XP_017329111.1 | 243  |
| 108268592 | tmem231      | XP_017329124.1 | 309  |
| 108268626 | cenpu        | XP_017329170.1 | 428  |
| 108268651 | znf276       | XP_017329208.1 | 414  |
| 108268662 | LOC108268662 | XP_017329223.1 | 221  |
| 108268663 | LOC108268663 | XP_017329225.1 | 118  |
| 108268671 | slbp         | XP_017329239.1 | 295  |
| 108268715 | zgrf1        | XP_017329327.1 | 545  |
| 108268795 | nup62        | XP_017329480.1 | 512  |
| 108268819 | LOC108268819 | XP_017329532.1 | 130  |
| 108268848 | LOC108268848 | XP_017329602.1 | 574  |
| 108268865 | LOC108268865 | XP_017329658.1 | 272  |
| 108268900 | LOC108268900 | XP_017329725.1 | 448  |
| 108268938 | nxt2         | XP_017329800.1 | 143  |
| 108268953 | LOC108268953 | XP_017329827.1 | 118  |
| 108268958 | LOC108268958 | XP_017329853.1 | 795  |
| 108268966 | ubl3         | XP_017329876.1 | 118  |
| 108268984 | LOC108268984 | XP_017329916.1 | 473  |
| 108268995 | coq9         | XP_017329950.1 | 333  |
| 108269003 | borcs5       | XP_017329960.1 | 195  |
| 108269101 | LOC108269101 | XP_017330157.1 | 318  |
| 108269114 | LOC108269114 | XP_017330183.1 | 85   |
| 108269120 | LOC108269120 | XP_017330191.1 | 282  |

|           |              |                |      |
|-----------|--------------|----------------|------|
| 108269176 | LOC108269176 | XP_017330307.1 | 245  |
| 108269185 | LOC108269185 | XP_017330322.1 | 156  |
| 108269188 | fibp         | XP_017330340.1 | 357  |
| 108269237 | ndufa1       | XP_017330468.1 | 70   |
| 108269238 | cfl1         | XP_017330469.1 | 165  |
| 108269272 | fam149a      | XP_017330522.1 | 655  |
| 108269287 | efcab6       | XP_017330552.1 | 1478 |
| 108269326 | LOC108269326 | XP_017330629.1 | 347  |
| 108269346 | rnf4         | XP_017330657.1 | 191  |
| 108269357 | LOC108269357 | XP_017330674.1 | 391  |
| 108269364 | LOC108269364 | XP_017330687.1 | 187  |
| 108269379 | mmgt1        | XP_017330712.1 | 130  |
| 108269405 | spata4       | XP_017330744.1 | 230  |
| 108269408 | glod5        | XP_017330752.1 | 160  |
| 108269432 | jdp2         | XP_017330797.1 | 170  |
| 108269435 | g2e3         | XP_017330800.1 | 652  |
| 108269445 | LOC108269445 | XP_017330825.1 | 260  |
| 108269449 | spata7       | XP_017330834.1 | 410  |
| 108269538 | LOC108269538 | XP_017330973.1 | 914  |
| 108269545 | LOC108269545 | XP_017330982.1 | 380  |
| 108269546 | c9h2orf71    | XP_017330979.1 | 1131 |
| 108269553 | mrps15       | XP_017330993.1 | 260  |
| 108269556 | LOC108269556 | XP_017330992.1 | 1129 |
| 108269564 | LOC108269564 | XP_017331003.1 | 211  |
| 108269573 | LOC108269573 | XP_017331011.1 | 480  |
| 108269574 | LOC108269574 | XP_017331012.1 | 214  |
| 108269637 | srp14        | XP_017331100.1 | 110  |
| 108269750 | kiaa0586     | XP_017331217.1 | 1588 |
| 108269761 | ecd          | XP_017331237.1 | 639  |
| 108269771 | tmem206      | XP_017331259.1 | 350  |
| 108269838 | LOC108269838 | XP_017331403.1 | 151  |
| 108269857 | LOC108269857 | XP_017331439.1 | 221  |
| 108269858 | LOC108269858 | XP_017331440.1 | 195  |
| 108269863 | LOC108269863 | XP_017331449.1 | 304  |
| 108269946 | tex36        | XP_017331608.1 | 196  |
| 108270035 | LOC108270035 | XP_017331764.1 | 466  |
| 108270064 | iah1         | XP_017331846.1 | 250  |
| 108270131 | c9h14orf1    | XP_017331983.1 | 143  |
| 108270148 | bre          | XP_017332021.1 | 386  |
| 108270179 | cenpo        | XP_017332083.1 | 282  |
| 108270183 | fam149b1     | XP_017332087.1 | 610  |
| 108270209 | c9h8orf74    | XP_017332135.1 | 279  |
| 108270291 | kiaa1841     | XP_017332307.1 | 705  |
| 108270326 | slc39a9      | XP_017332387.1 | 305  |
| 108270334 | erich1       | XP_017332400.1 | 308  |

|           |              |                |      |
|-----------|--------------|----------------|------|
| 108270385 | nubpl        | XP_017332506.1 | 328  |
| 108270427 | LOC108270427 | XP_017332609.1 | 699  |
| 108270430 | LOC108270430 | XP_017332613.1 | 191  |
| 108270459 | lin52        | XP_017332679.1 | 112  |
| 108270467 | fam181a      | XP_017332692.1 | 291  |
| 108270468 | LOC108270468 | XP_017332694.1 | 151  |
| 108270512 | pex11g       | XP_017332787.1 | 218  |
| 108270515 | LOC108270515 | XP_017332796.1 | 204  |
| 108270527 | axdnd1       | XP_017332811.1 | 1042 |
| 108270528 | c1h7orf50    | XP_017332817.1 | 279  |
| 108270544 | LOC108270544 | XP_017332843.1 | 303  |
| 108270569 | pdzk1ip1     | XP_017332885.1 | 109  |
| 108270606 | tmem204      | XP_017332952.1 | 219  |
| 108270612 | ogfod1       | XP_017332928.1 | 540  |
| 108270622 | LOC108270622 | XP_017332938.1 | 848  |
| 108270629 | ankub1       | XP_017332943.1 | 637  |
| 108270633 | spata1       | XP_017332948.1 | 390  |
| 108270659 | LOC108270659 | XP_017332973.1 | 206  |
| 108270682 | mrpl21       | XP_017332998.1 | 206  |
| 108270721 | LOC108270721 | XP_017333063.1 | 536  |
| 108270750 | tp53inp1     | XP_017333134.1 | 242  |
| 108270760 | lyrm1        | XP_017333275.1 | 122  |
| 108270813 | LOC108270813 | XP_017333245.1 | 371  |
| 108270820 | rsph3        | XP_017333258.1 | 328  |
| 108270827 | LOC108270827 | XP_017333268.1 | 229  |
| 108270830 | c1h8orf37    | XP_017333284.1 | 208  |
| 108270841 | c10h19orf60  | XP_017333295.1 | 157  |
| 108270843 | fam174a      | XP_017333296.1 | 129  |
| 108270897 | LOC108270897 | XP_017333386.1 | 651  |
| 108270906 | LOC108270906 | XP_017333404.1 | 127  |
| 108270910 | ist1         | XP_017333413.1 | 342  |
| 108270958 | mrpl54       | XP_017333510.1 | 139  |
| 108271009 | tradd        | XP_017333645.1 | 294  |
| 108271026 | LOC108271026 | XP_017333685.1 | 133  |
| 108271030 | afmid        | XP_017333706.1 | 293  |
| 108271033 | ppp1r2       | XP_017333711.1 | 204  |
| 108271034 | LOC108271034 | XP_017333713.1 | 395  |
| 108271047 | vimp         | XP_017333731.1 | 189  |
| 108271049 | mecr         | XP_017333748.1 | 344  |
| 108271079 | LOC108271079 | XP_017333817.1 | 469  |
| 108271133 | dnajc19      | XP_017333934.1 | 116  |
| 108271157 | prune1       | XP_017334001.1 | 429  |
| 108271173 | impact       | XP_017334024.1 | 322  |
| 108271184 | mydgf        | XP_017334042.1 | 178  |
| 108271190 | LOC108271190 | XP_017334054.1 | 289  |

|           |              |                |      |
|-----------|--------------|----------------|------|
| 108271194 | LOC108271194 | XP_017334058.1 | 221  |
| 108271213 | LOC108271213 | XP_017334100.1 | 112  |
| 108271221 | pigx         | XP_017334116.1 | 215  |
| 108271222 | LOC108271222 | XP_017334120.1 | 230  |
| 108271237 | lins1        | XP_017334154.1 | 662  |
| 108271246 | LOC108271246 | XP_017334171.1 | 1368 |
| 108271266 | c10h19orf70  | XP_017334212.1 | 111  |
| 108271272 | tmem221      | XP_017334223.1 | 273  |
| 108271275 | borcs8       | XP_017334230.1 | 128  |
| 108271285 | r3hdm4       | XP_017334247.1 | 254  |
| 108271332 | nadsyn1      | XP_017334345.1 | 701  |
| 108271362 | LOC108271362 | XP_017334427.1 | 77   |
| 108271369 | c1h9orf152   | XP_017334440.1 | 224  |
| 108271373 | fbxo22       | XP_017334431.1 | 389  |
| 108271386 | LOC108271386 | XP_017334449.1 | 154  |
| 108271399 | bola3        | XP_017334473.1 | 105  |
| 108271413 | c10h1orf53   | XP_017334492.1 | 158  |
| 108271431 | mrps11       | XP_017334520.1 | 202  |
| 108271500 | LOC108271500 | XP_017334602.1 | 201  |
| 108271505 | LOC108271505 | XP_017334614.1 | 259  |
| 108271521 | LOC108271521 | XP_017334637.1 | 617  |
| 108271526 | manbal       | XP_017334643.1 | 87   |
| 108271565 | LOC108271565 | XP_017334707.1 | 919  |
| 108271582 | rsg1         | XP_017334731.1 | 250  |
| 108271588 | LOC108271588 | XP_017334740.1 | 853  |
| 108271659 | ssb          | XP_017334864.1 | 407  |
| 108271660 | LOC108271660 | XP_017334866.1 | 313  |
| 108271708 | LOC108271708 | XP_017334922.1 | 90   |
| 108271721 | LOC108271721 | XP_017334924.1 | 124  |
| 108271730 | trub2        | XP_017334930.1 | 350  |
| 108271731 | LOC108271731 | XP_017334932.1 | 157  |
| 108271797 | LOC108271797 | XP_017335063.1 | 127  |
| 108271804 | blcap        | XP_017335073.1 | 87   |
| 108271811 | ccdc174      | XP_017335082.1 | 474  |
| 108271834 | LOC108271834 | XP_017335152.1 | 144  |
| 108271867 | LOC108271867 | XP_017335235.1 | 168  |
| 108271895 | nprl2        | XP_017335313.1 | 379  |
| 108271903 | mrpl47       | XP_017335326.1 | 251  |
| 108271970 | ddi2         | XP_017335457.1 | 426  |
| 108272020 | nubp2        | XP_017335618.1 | 270  |
| 108272024 | pxmp4        | XP_017335579.1 | 210  |
| 108272045 | LOC108272045 | XP_017335630.1 | 111  |
| 108272056 | tomm6        | XP_017335657.1 | 71   |
| 108272058 | LOC108272058 | XP_017335663.1 | 283  |
| 108272076 | LOC108272076 | XP_017335728.1 | 81   |

|           |              |                |      |
|-----------|--------------|----------------|------|
| 108272088 | c11h1orf146  | XP_017335739.1 | 175  |
| 108272129 | lrrc41       | XP_017335822.1 | 584  |
| 108272150 | LOC108272150 | XP_017335866.1 | 238  |
| 108272178 | sycp1        | XP_017335927.1 | 954  |
| 108272267 | LOC108272267 | XP_017336069.1 | 114  |
| 108272277 | c11h1orf159  | XP_017336084.1 | 192  |
| 108272321 | mrpl36       | XP_017336148.1 | 116  |
| 108272336 | ube3d        | XP_017336175.1 | 392  |
| 108272338 | LOC108272338 | XP_017336173.1 | 168  |
| 108272359 | rps19bp1     | XP_017336220.1 | 150  |
| 108272378 | dtd1         | XP_017336253.1 | 257  |
| 108272400 | zglp1        | XP_017336283.1 | 537  |
| 108272404 | c12h17orf67  | XP_017336299.1 | 85   |
| 108272416 | LOC108272416 | XP_017336321.1 | 86   |
| 108272422 | LOC108272422 | XP_017336327.1 | 579  |
| 108272442 | LOC108272442 | XP_017336348.1 | 111  |
| 108272482 | mei1         | XP_017336392.1 | 1292 |
| 108272509 | no112        | XP_017336445.1 | 234  |
| 108272515 | polr2f       | XP_017336450.1 | 121  |
| 108272526 | stx8         | XP_017336462.1 | 236  |
| 108272547 | pigv         | XP_017336530.1 | 486  |
| 108272548 | fopnl        | XP_017336504.1 | 121  |
| 108272558 | LOC108272558 | XP_017336524.1 | 204  |
| 108272565 | LOC108272565 | XP_017336532.1 | 118  |
| 108272599 | LOC108272599 | XP_017336578.1 | 211  |
| 108272621 | s100a14      | XP_017336616.1 | 104  |
| 108272626 | LOC108272626 | XP_017336622.1 | 260  |
| 108272632 | LOC108272632 | XP_017336641.1 | 90   |
| 108272697 | c12h6orf136  | XP_017336800.1 | 415  |
| 108272718 | zdbf2        | XP_017336858.1 | 871  |
| 108272728 | LOC108272728 | XP_017336879.1 | 275  |
| 108272746 | LOC108272746 | XP_017336925.1 | 248  |
| 108272747 | LOC108272747 | XP_017336926.1 | 212  |
| 108272753 | ppp1r11      | XP_017336941.1 | 123  |
| 108272758 | endov        | XP_017336952.1 | 250  |
| 108272761 | sdha         | XP_017336956.1 | 662  |
| 108272796 | c12h5orf49   | XP_017337035.1 | 136  |
| 108272805 | LOC108272805 | XP_017337090.1 | 472  |
| 108272811 | fbf1         | XP_017337070.1 | 1137 |
| 108272837 | LOC108272837 | XP_017337122.1 | 345  |
| 108272843 | rtbdn        | XP_017337130.1 | 263  |
| 108272846 | pmm1         | XP_017337135.1 | 259  |
| 108272847 | LOC108272847 | XP_017337136.1 | 216  |
| 108272854 | LOC108272854 | XP_017337156.1 | 150  |
| 108272857 | LOC108272857 | XP_017337161.1 | 132  |

|           |              |                |      |
|-----------|--------------|----------------|------|
| 108272880 | gtf2h4       | XP_017337174.1 | 467  |
| 108272884 | pdss1        | XP_017337193.1 | 422  |
| 108272889 | LOC108272889 | XP_017337203.1 | 364  |
| 108272892 | LOC108272892 | XP_017337206.1 | 250  |
| 108272972 | LOC108272972 | XP_017337368.1 | 3158 |
| 108273004 | jmjd8        | XP_017337429.1 | 261  |
| 108273007 | hsppb1       | XP_017337448.1 | 326  |
| 108273027 | tmem220      | XP_017337487.1 | 167  |
| 108273100 | catip        | XP_017337611.1 | 368  |
| 108273138 | LOC108273138 | XP_017337668.1 | 142  |
| 108273139 | LOC108273139 | XP_017337671.1 | 345  |
| 108273197 | ssr2         | XP_017337788.1 | 185  |
| 108273218 | LOC108273218 | XP_017337834.1 | 165  |
| 108273235 | dph3         | XP_017337868.1 | 85   |
| 108273240 | csnk2b       | XP_017337877.1 | 215  |
| 108273242 | nudt15       | XP_017337881.1 | 162  |
| 108273279 | arl6ip6      | XP_017337929.1 | 183  |
| 108273299 | triqk        | XP_017337949.1 | 84   |
| 108273303 | wbp4         | XP_017337956.1 | 369  |
| 108273407 | LOC108273407 | XP_017338083.1 | 602  |
| 108273421 | tnfrsf17     | XP_017338113.1 | 186  |
| 108273470 | fads6        | XP_017338193.1 | 355  |
| 108273531 | cd84         | XP_017338293.1 | 632  |
| 108273532 | LOC108273532 | XP_017338295.1 | 255  |
| 108273533 | LOC108273533 | XP_017338296.1 | 327  |
| 108273539 | LOC108273539 | XP_017338302.1 | 214  |
| 108273543 | LOC108273543 | XP_017338304.1 | 219  |
| 108273551 | LOC108273551 | XP_017338314.1 | 150  |
| 108273621 | pstk         | XP_017338466.1 | 298  |
| 108273634 | LOC108273634 | XP_017338475.1 | 69   |
| 108273640 | LOC108273640 | XP_017338488.1 | 903  |
| 108273643 | nif3l1       | XP_017338492.1 | 413  |
| 108273677 | LOC108273677 | XP_017338571.1 | 326  |
| 108273694 | LOC108273694 | XP_017338585.1 | 241  |
| 108273715 | cep131       | XP_017338627.1 | 1095 |
| 108273736 | zcchc4       | XP_017338684.1 | 482  |
| 108273764 | amz2         | XP_017338764.1 | 352  |
| 108273775 | LOC108273775 | XP_017338787.1 | 133  |
| 108273793 | LOC108273793 | XP_017338810.1 | 122  |
| 108273794 | c13h17orf89  | XP_017338811.1 | 70   |
| 108273805 | ghdc         | XP_017338850.1 | 627  |
| 108273871 | armc7        | XP_017338998.1 | 198  |
| 108273878 | lsm5         | XP_017339009.1 | 91   |
| 108273919 | mettl9       | XP_017339098.1 | 323  |
| 108273920 | LOC108273920 | XP_017339103.1 | 326  |

|           |              |                |     |
|-----------|--------------|----------------|-----|
| 108273936 | LOC108273936 | XP_017339127.1 | 332 |
| 108273940 | c13h10orf2   | XP_017339130.1 | 736 |
| 108274003 | mtol         | XP_017339245.1 | 660 |
| 108274006 | LOC108274006 | XP_017339251.1 | 414 |
| 108274049 | tmem128      | XP_017339338.1 | 165 |
| 108274088 | LOC108274088 | XP_017339436.1 | 362 |
| 108274099 | anapc16      | XP_017339456.1 | 109 |
| 108274101 | LOC108274101 | XP_017339469.1 | 132 |
| 108274118 | cby1         | XP_017339507.1 | 125 |
| 108274124 | LOC108274124 | XP_017339516.1 | 266 |
| 108274132 | LOC108274132 | XP_017339533.1 | 213 |
| 108274154 | stra13       | XP_017339585.1 | 81  |
| 108274158 | igsf6        | XP_017339599.1 | 252 |
| 108274169 | uros         | XP_017339630.1 | 263 |
| 108274171 | c13h17orf62  | XP_017339636.1 | 211 |
| 108274181 | LOC108274181 | XP_017339652.1 | 101 |
| 108274182 | cntd1        | XP_017339655.1 | 227 |
| 108274237 | slamf7       | XP_017339755.1 | 333 |
| 108274239 | LOC108274239 | XP_017339766.1 | 110 |
| 108274317 | LOC108274317 | XP_017339904.1 | 119 |
| 108274323 | rsl1d1       | XP_017339916.1 | 378 |
| 108274332 | LOC108274332 | XP_017339931.1 | 426 |
| 108274357 | atpaf2       | XP_017339977.1 | 288 |
| 108274373 | adprm        | XP_017340008.1 | 324 |
| 108274421 | LOC108274421 | XP_017340070.1 | 385 |
| 108274437 | LOC108274437 | XP_017340103.1 | 377 |
| 108274465 | LOC108274465 | XP_017340142.1 | 145 |
| 108274489 | LOC108274489 | XP_017340213.1 | 494 |
| 108274543 | LOC108274543 | XP_017340246.1 | 382 |
| 108274556 | mansc4       | XP_017340260.1 | 455 |
| 108274570 | LOC108274570 | XP_017340272.1 | 253 |
| 108274594 | LOC108274594 | XP_017340295.1 | 145 |
| 108274600 | LOC108274600 | XP_017340300.1 | 281 |
| 108274660 | c14h5orf24   | XP_017340376.1 | 203 |
| 108274663 | LOC108274663 | XP_017340380.1 | 195 |
| 108274703 | pgghg        | XP_017340465.1 | 699 |
| 108274729 | nfatc2ip     | XP_017340516.1 | 325 |
| 108274730 | LOC108274730 | XP_017340517.1 | 210 |
| 108274805 | msto1        | XP_017340682.1 | 589 |
| 108274815 | LOC108274815 | XP_017340704.1 | 132 |
| 108274833 | LOC108274833 | XP_017340746.1 | 317 |
| 108274844 | LOC108274844 | XP_017340765.1 | 278 |
| 108274851 | LOC108274851 | XP_017340774.1 | 254 |
| 108274880 | LOC108274880 | XP_017340816.1 | 132 |
| 108274911 | LOC108274911 | XP_017340854.1 | 97  |



|           |              |                |      |
|-----------|--------------|----------------|------|
| 108274930 | nrg4         | XP_017340843.1 | 97   |
| 108274964 | LOC108274964 | XP_017340920.1 | 356  |
| 108274971 | LOC108274971 | XP_017340934.1 | 136  |
| 108274994 | rfwd3        | XP_017340989.1 | 698  |
| 108275006 | LOC108275006 | XP_017341021.1 | 298  |
| 108275008 | snupn        | XP_017341026.1 | 363  |
| 108275034 | LOC108275034 | XP_017341076.1 | 173  |
| 108275085 | LOC108275085 | XP_017341189.1 | 222  |
| 108275124 | LOC108275124 | XP_017341218.1 | 262  |
| 108275137 | fbxl22       | XP_017341238.1 | 227  |
| 108275153 | LOC108275153 | XP_017341260.1 | 259  |
| 108275158 | LOC108275158 | XP_017341265.1 | 230  |
| 108275160 | LOC108275160 | XP_017341266.1 | 1148 |
| 108275170 | pdc2l        | XP_017341285.1 | 352  |
| 108275196 | jmjd6        | XP_017341324.1 | 140  |
| 108275210 | lrrc56       | XP_017341346.1 | 629  |
| 108275351 | LOC108275351 | XP_017341616.1 | 234  |
| 108275371 | dctn4        | XP_017341640.1 | 467  |
| 108275393 | LOC108275393 | XP_017341663.1 | 719  |
| 108275413 | fam96a       | XP_017341695.1 | 157  |
| 108275422 | LOC108275422 | XP_017341716.1 | 245  |
| 108275461 | LOC108275461 | XP_017341784.1 | 299  |
| 108275481 | epm2a        | XP_017341821.1 | 323  |
| 108275523 | LOC108275523 | XP_017341878.1 | 166  |
| 108275566 | LOC108275566 | XP_017341953.1 | 474  |
| 108275567 | lkaear1      | XP_017341956.1 | 144  |
| 108275572 | irak1bp1     | XP_017341961.1 | 249  |
| 108275574 | ubxn10       | XP_017341965.1 | 222  |
| 108275597 | LOC108275597 | XP_017341990.1 | 340  |
| 108275606 | LOC108275606 | XP_017342001.1 | 1102 |
| 108275610 | LOC108275610 | XP_017342005.1 | 367  |
| 108275615 | LOC108275615 | XP_017342009.1 | 548  |
| 108275642 | LOC108275642 | XP_017342036.1 | 555  |
| 108275660 | LOC108275660 | XP_017342078.1 | 148  |
| 108275665 | LOC108275665 | XP_017342075.1 | 289  |
| 108275681 | LOC108275681 | XP_017342084.1 | 183  |
| 108275682 | LOC108275682 | XP_017342086.1 | 122  |
| 108275702 | LOC108275702 | XP_017342115.1 | 273  |
| 108275703 | LOC108275703 | XP_017342117.1 | 206  |
| 108275704 | trappc1      | XP_017342118.1 | 145  |
| 108275706 | LOC108275706 | XP_017342121.1 | 100  |
| 108275707 | LOC108275707 | XP_017342122.1 | 66   |
| 108275752 | LOC108275752 | XP_017342185.1 | 167  |
| 108275757 | LOC108275757 | XP_017342195.1 | 447  |
| 108275758 | LOC108275758 | XP_017342196.1 | 445  |

|           |              |                |      |
|-----------|--------------|----------------|------|
| 108275760 | LOC108275760 | XP_017342203.1 | 221  |
| 108275801 | c15h20orf24  | XP_017342288.1 | 128  |
| 108275809 | LOC108275809 | XP_017342298.1 | 275  |
| 108275817 | kti12        | XP_017342313.1 | 275  |
| 108275827 | LOC108275827 | XP_017342333.1 | 79   |
| 108275830 | LOC108275830 | XP_017342336.1 | 297  |
| 108275832 | LOC108275832 | XP_017342338.1 | 605  |
| 108275833 | plekhn2      | XP_017342343.1 | 938  |
| 108275920 | LOC108275920 | XP_017342544.1 | 286  |
| 108275937 | slc35c2      | XP_017342591.1 | 354  |
| 108275956 | LOC108275956 | XP_017342623.1 | 168  |
| 108275963 | LOC108275963 | XP_017342641.1 | 108  |
| 108275973 | LOC108275973 | XP_017342672.1 | 228  |
| 108276081 | LOC108276081 | XP_017342914.1 | 201  |
| 108276082 | LOC108276082 | XP_017342915.1 | 158  |
| 108276104 | LOC108276104 | XP_017342966.1 | 770  |
| 108276126 | gpr157       | XP_017343012.1 | 336  |
| 108276133 | smim4        | XP_017343022.1 | 81   |
| 108276175 | aurkaip1     | XP_017343118.1 | 209  |
| 108276194 | ccdc103      | XP_017343151.1 | 244  |
| 108276198 | LOC108276198 | XP_017343154.1 | 99   |
| 108276253 | dnajc22      | XP_017343255.1 | 340  |
| 108276266 | ctc1         | XP_017343276.1 | 1260 |
| 108276292 | LOC108276292 | XP_017343345.1 | 172  |
| 108276302 | LOC108276302 | XP_017343366.1 | 175  |
| 108276309 | oard1        | XP_017343377.1 | 155  |
| 108276342 | LOC108276342 | XP_017343433.1 | 396  |
| 108276355 | LOC108276355 | XP_017343456.1 | 253  |
| 108276400 | hmgn3        | XP_017343533.1 | 96   |
| 108276434 | LOC108276434 | XP_017343592.1 | 174  |
| 108276471 | LOC108276471 | XP_017343659.1 | 376  |
| 108276476 | haus7        | XP_017343667.1 | 411  |
| 108276528 | LOC108276528 | XP_017343763.1 | 627  |
| 108276534 | LOC108276534 | XP_017343774.1 | 210  |
| 108276535 | ier3ip1      | XP_017343776.1 | 82   |
| 108276537 | setd9        | XP_017343779.1 | 259  |
| 108276556 | dcps         | XP_017343808.1 | 323  |
| 108276590 | LOC108276590 | XP_017343905.1 | 102  |
| 108276593 | c16h5orf63   | XP_017343869.1 | 123  |
| 108276612 | phf24        | XP_017343903.1 | 416  |
| 108276651 | LOC108276651 | XP_017343949.1 | 236  |
| 108276652 | sertm1       | XP_017343950.1 | 123  |
| 108276653 | LOC108276653 | XP_017343951.1 | 249  |
| 108276691 | rhbdd2       | XP_017344003.1 | 376  |
| 108276721 | ccdc62       | XP_017344067.1 | 523  |

|           |              |                |      |
|-----------|--------------|----------------|------|
| 108276734 | snx24        | XP_017344098.1 | 172  |
| 108276745 | srek1ip1     | XP_017344136.1 | 158  |
| 108276751 | LOC108276751 | XP_017344146.1 | 84   |
| 108276768 | LOC108276768 | XP_017344177.1 | 240  |
| 108276771 | LOC108276771 | XP_017344185.1 | 150  |
| 108276776 | crebzf       | XP_017344205.1 | 271  |
| 108276778 | ift46        | XP_017344209.1 | 351  |
| 108276779 | LOC108276779 | XP_017344213.1 | 248  |
| 108276807 | htatsf1      | XP_017344282.1 | 459  |
| 108276825 | lcn2         | XP_017344320.1 | 203  |
| 108276831 | swi5         | XP_017344328.1 | 138  |
| 108276852 | dexi         | XP_017344374.1 | 89   |
| 108276856 | mocs2        | XP_017344379.1 | 86   |
| 108276870 | nubp1        | XP_017344407.1 | 326  |
| 108276896 | wdr74        | XP_017344466.1 | 404  |
| 108276919 | acer3        | XP_017344520.1 | 230  |
| 108276925 | bri3         | XP_017344535.1 | 135  |
| 108276953 | LOC108276953 | XP_017344611.1 | 365  |
| 108276954 | LOC108276954 | XP_017344615.1 | 296  |
| 108276955 | LOC108276955 | XP_017344617.1 | 287  |
| 108276956 | LOC108276956 | XP_017344623.1 | 271  |
| 108276990 | morn5        | XP_017344712.1 | 183  |
| 108276991 | rbm18        | XP_017344713.1 | 189  |
| 108277062 | mrpl48       | XP_017344860.1 | 257  |
| 108277066 | tiprl        | XP_017344868.1 | 225  |
| 108277077 | rnasek       | XP_017344886.1 | 101  |
| 108277099 | LOC108277099 | XP_017344969.1 | 261  |
| 108277109 | tmem135      | XP_017344982.1 | 463  |
| 108277116 | LOC108277116 | XP_017344993.1 | 1220 |
| 108277174 | LOC108277174 | XP_017345150.1 | 393  |
| 108277202 | abhd18       | XP_017345207.1 | 435  |
| 108277208 | LOC108277208 | XP_017345234.1 | 129  |
| 108277210 | rippy3       | XP_017345218.1 | 127  |
| 108277298 | hirip3       | XP_017345391.1 | 576  |
| 108277311 | brf2         | XP_017345409.1 | 401  |
| 108277312 | LOC108277312 | XP_017345410.1 | 388  |
| 108277329 | zcchc9       | XP_017345453.1 | 292  |
| 108277351 | timm10b      | XP_017345491.1 | 188  |
| 108277380 | urml         | XP_017345552.1 | 101  |
| 108277426 | mrps23       | XP_017345656.1 | 190  |
| 108277433 | parl         | XP_017345675.1 | 358  |
| 108277470 | LOC108277470 | XP_017345743.1 | 390  |
| 108277487 | LOC108277487 | XP_017345780.1 | 251  |
| 108277501 | LOC108277501 | XP_017345807.1 | 149  |
| 108277510 | lyrm9        | XP_017345821.1 | 94   |

|           |              |                |     |
|-----------|--------------|----------------|-----|
| 108277513 | LOC108277513 | XP_017345825.1 | 780 |
| 108277523 | gap43        | XP_017345837.1 | 222 |
| 108277527 | fam181b      | XP_017345841.1 | 322 |
| 108277556 | LOC108277556 | XP_017345867.1 | 244 |
| 108277586 | lrrc72       | XP_017345892.1 | 260 |
| 108277607 | LOC108277607 | XP_017345909.1 | 449 |
| 108277654 | LOC108277654 | XP_017345945.1 | 246 |
| 108277656 | sln          | XP_017345947.1 | 32  |
| 108277673 | psenen       | XP_017345967.1 | 101 |
| 108277677 | mettl16      | XP_017345972.1 | 506 |
| 108277679 | LOC108277679 | XP_017345977.1 | 909 |
| 108277709 | vmp1         | XP_017346028.1 | 406 |
| 108277730 | LOC108277730 | XP_017346078.1 | 236 |
| 108277785 | tex12        | XP_017346181.1 | 157 |
| 108277787 | sdhd         | XP_017346194.1 | 155 |
| 108277805 | rffl         | XP_017346225.1 | 349 |
| 108277806 | mkks         | XP_017346231.1 | 506 |
| 108277841 | LOC108277841 | XP_017346308.1 | 310 |
| 108277928 | lamtor1      | XP_017346475.1 | 159 |
| 108278005 | LOC108278005 | XP_017346606.1 | 329 |
| 108278066 | LOC108278066 | XP_017346700.1 | 273 |
| 108278141 | znf414       | XP_017346821.1 | 322 |
| 108278146 | LOC108278146 | XP_017346829.1 | 203 |
| 108278149 | thap4        | XP_017346834.1 | 176 |
| 108278189 | nudt8        | XP_017346876.1 | 328 |
| 108278221 | med29        | XP_017346922.1 | 182 |
| 108278229 | tp53i13      | XP_017346932.1 | 498 |
| 108278243 | LOC108278243 | XP_017346950.1 | 224 |
| 108278261 | LOC108278261 | XP_017346976.1 | 560 |
| 108278282 | kiaa0753     | XP_017347020.1 | 856 |
| 108278291 | LOC108278291 | XP_017347038.1 | 398 |
| 108278320 | cd3g         | XP_017347102.1 | 165 |
| 108278351 | tex26        | XP_017347167.1 | 281 |
| 108278357 | LOC108278357 | XP_017347175.1 | 341 |
| 108278360 | LOC108278360 | XP_017347185.1 | 95  |
| 108278379 | apom         | XP_017347210.1 | 186 |
| 108278390 | colca2       | XP_017347232.1 | 238 |
| 108278459 | cdipt        | XP_017347344.1 | 213 |
| 108278492 | LOC108278492 | XP_017347394.1 | 376 |
| 108278522 | LOC108278522 | XP_017347453.1 | 377 |
| 108278547 | LOC108278547 | XP_017347486.1 | 408 |
| 108278567 | LOC108278567 | XP_017347507.1 | 567 |
| 108278588 | LOC108278588 | XP_017347534.1 | 323 |
| 108278599 | bhmg1        | XP_017347539.1 | 479 |
| 108278638 | LOC108278638 | XP_017347586.1 | 225 |

|           |              |                |     |
|-----------|--------------|----------------|-----|
| 108278668 | elof1        | XP_017347637.1 | 125 |
| 108278689 | LOC108278689 | XP_017347659.1 | 61  |
| 108278700 | LOC108278700 | XP_017347674.1 | 83  |
| 108278728 | LOC108278728 | XP_017347728.1 | 144 |
| 108278760 | pigs         | XP_017347807.1 | 564 |
| 108278771 | prdx5        | XP_017347825.1 | 185 |
| 108278818 | arpc3        | XP_017347929.1 | 178 |
| 108278861 | LOC108278861 | XP_017348002.1 | 286 |
| 108278864 | ik           | XP_017348012.1 | 544 |
| 108278895 | LOC108278895 | XP_017348088.1 | 179 |
| 108278918 | ecscr        | XP_017348142.1 | 131 |
| 108278938 | cks2         | XP_017348210.1 | 77  |
| 108278976 | rnf121       | XP_017348306.1 | 334 |
| 108278982 | LOC108278982 | XP_017348322.1 | 163 |
| 108279000 | LOC108279000 | XP_017348348.1 | 108 |
| 108279074 | sart1        | XP_017348517.1 | 778 |
| 108279103 | ostm1        | XP_017348568.1 | 294 |
| 108279148 | gnrh2        | XP_017348636.1 | 86  |
| 108279163 | dolpp1       | XP_017348668.1 | 238 |
| 108279178 | LOC108279178 | XP_017348697.1 | 219 |
| 108279196 | mcrip1       | XP_017348735.1 | 94  |
| 108279207 | tmigd1       | XP_017348747.1 | 263 |
| 108279211 | LOC108279211 | XP_017348754.1 | 256 |
| 108279226 | LOC108279226 | XP_017348784.1 | 92  |
| 108279231 | LOC108279231 | XP_017348792.1 | 78  |
| 108279234 | LOC108279234 | XP_017348795.1 | 184 |
| 108279242 | taf1a        | XP_017348811.1 | 429 |
| 108279254 | zw10         | XP_017348824.1 | 768 |
| 108279288 | LOC108279288 | XP_017348905.1 | 271 |
| 108279312 | fech         | XP_017348952.1 | 412 |
| 108279328 | LOC108279328 | XP_017348985.1 | 696 |
| 108279342 | ddias        | XP_017349010.1 | 644 |
| 108279354 | rippy1       | XP_017349040.1 | 152 |
| 108279367 | xrral        | XP_017349072.1 | 558 |
| 108279396 | LOC108279396 | XP_017349126.1 | 97  |
| 108279446 | mrps33       | XP_017349191.1 | 106 |
| 108279450 | LOC108279450 | XP_017349198.1 | 156 |
| 108279454 | LOC108279454 | XP_017349203.1 | 369 |
| 108279460 | c19h12orf75  | XP_017349212.1 | 80  |
| 108279494 | ccdc107      | XP_017349285.1 | 315 |
| 108279518 | ptrhd1       | XP_017349317.1 | 127 |
| 108279552 | atp6v1f      | XP_017349376.1 | 119 |
| 108279572 | LOC108279572 | XP_017349381.1 | 507 |
| 108279594 | LOC108279594 | XP_017349401.1 | 344 |
| 108279608 | LOC108279608 | XP_017349416.1 | 208 |

|           |              |                |     |
|-----------|--------------|----------------|-----|
| 108279616 | LOC108279616 | XP_017349420.1 | 140 |
| 108279620 | LOC108279620 | XP_017349423.1 | 282 |
| 108279621 | LOC108279621 | XP_017349426.1 | 176 |
| 108279633 | spx          | XP_017349443.1 | 112 |
| 108279678 | iapp         | XP_017349512.1 | 132 |
| 108279705 | rhno1        | XP_017349597.1 | 293 |
| 108279729 | slc35e3      | XP_017349642.1 | 260 |
| 108279730 | llph         | XP_017349645.1 | 178 |
| 108279790 | LOC108279790 | XP_017349766.1 | 76  |
| 108279802 | alg12        | XP_017349784.1 | 496 |
| 108279808 | mest         | XP_017349793.1 | 298 |
| 108279818 | LOC108279818 | XP_017349799.1 | 341 |
| 108279866 | c19h11orf98  | XP_017349919.1 | 116 |
| 108279867 | mansc1       | XP_017349921.1 | 458 |
| 108279898 | cdpf1        | XP_017350000.1 | 113 |
| 108280010 | smkr1        | XP_017350226.1 | 87  |
| 108280035 | LOC108280035 | XP_017350265.1 | 228 |
| 108280046 | mrpl42       | XP_017350283.1 | 150 |
| 108280048 | tll12        | XP_017350287.1 | 620 |
| 108280054 | lsm8         | XP_017350294.1 | 96  |
| 108280084 | ccdc42       | XP_017350344.1 | 334 |
| 108280094 | ssbp1        | XP_017350360.1 | 146 |
| 108280096 | LOC108280096 | XP_017350362.1 | 79  |
| 108280105 | LOC108280105 | XP_017350396.1 | 204 |
| 108280128 | tmem243      | XP_017350378.1 | 139 |
| 108280143 | mrps18a      | XP_017350409.1 | 208 |
| 108280144 | c19h12orf40  | XP_017350413.1 | 611 |
| 108280224 | LOC108280224 | XP_017350549.1 | 268 |
| 108280245 | LOC108280245 | XP_017350580.1 | 247 |
| 108280283 | hhla1        | XP_017350622.1 | 429 |
| 108280321 | LOC108280321 | XP_017350678.1 | 195 |
| 108280322 | LOC108280322 | XP_017350679.1 | 194 |
| 108280326 | LOC108280326 | XP_017350681.1 | 260 |
| 108280350 | LOC108280350 | XP_017350740.1 | 367 |
| 108280351 | LOC108280351 | XP_017350743.1 | 267 |
| 108280363 | LOC108280363 | XP_017350755.1 | 135 |
| 108280381 | tstd3        | XP_017350785.1 | 156 |
| 108280382 | LOC108280382 | XP_017350786.1 | 81  |
| 108280406 | pih1d3       | XP_017350834.1 | 239 |
| 108280437 | adhfe1       | XP_017350884.1 | 443 |
| 108280468 | rpap2        | XP_017350945.1 | 608 |
| 108280484 | LOC108280484 | XP_017350999.1 | 315 |
| 108280493 | LOC108280493 | XP_017351012.1 | 323 |
| 108280507 | pih1d1       | XP_017351032.1 | 281 |
| 108280514 | LOC108280514 | XP_017351063.1 | 272 |

|           |              |                |     |
|-----------|--------------|----------------|-----|
| 108280542 | LOC108280542 | XP_017351122.1 | 283 |
| 108280592 | sptssb       | XP_017351226.1 | 80  |
| 108280629 | mre11a       | XP_017351314.1 | 698 |
| 108280651 | sugp1        | XP_017351363.1 | 626 |
| 108280671 | atp5sl       | XP_017351447.1 | 257 |
| 108280678 | LOC108280678 | XP_017351462.1 | 308 |
| 108280687 | LOC108280687 | XP_017351482.1 | 92  |
| 108280738 | pnisr        | XP_017351582.1 | 753 |
| 108280817 | ech1         | XP_017351736.1 | 305 |
| 108280846 | emc10        | XP_017351788.1 | 253 |
| 108280854 | kncn         | XP_017351803.1 | 149 |
| 108280912 | LOC108280912 | XP_017351907.1 | 104 |
| 108280990 | LOC108280990 | XP_017351995.1 | 251 |
| 108281024 | LOC108281024 | XP_017352057.1 | 302 |
| 108281047 | LOC108281047 | XP_017352082.1 | 201 |
| 108281048 | nek4         | XP_017352083.1 | 310 |
| 108281053 | npff         | XP_017352088.1 | 117 |
| 108281058 | LOC108281058 | XP_017352093.1 | 813 |
| 108281064 | LOC108281064 | XP_017352099.1 | 218 |
| 108281068 | LOC108281068 | XP_017352103.1 | 185 |
| 108281094 | LOC108281094 | XP_017352153.1 | 172 |
| 108281103 | asb17        | XP_017352164.1 | 206 |
| 108281106 | LOC108281106 | XP_017352166.1 | 295 |

---
