# Supplementary material
Source: PubMed Central journal article supplement (PMC5984497)
Supplement: pnas.1718603115.sd02.pdf [file pnas.1718603115.sd02.pdf]

Dataset 2 Differentially expressed genes during barbel regeneration of channel catfish.

| Gene ID   | Name         | $\log_2$ (Fold change) |        |        |        |         |
|-----------|--------------|------------------------|--------|--------|--------|---------|
|           |              | Con&1d                 | Con&2d | Con&3d | Con&7d | Con&14d |
| 108270119 | stac         | -1.28                  | -0.75  | -0.66  | -0.36  | -0.23   |
| 108270120 | LOC108270120 | -1.05                  | -0.15  | -0.75  | 0.71   | 0.39    |
| 108269887 | LOC108269887 | 0.67                   | 0.66   | 0.38   | 1.01   | 0.51    |
| 108270268 | LOC108270268 | -0.08                  | -0.70  | -0.77  | -1.04  | -0.24   |
| 108269603 | LOC108269603 | 0.52                   | -0.29  | -1.22  | -0.14  | 0.68    |
| 108270153 | srrm1        | -1.10                  | -0.48  | -0.27  | -0.47  | -0.36   |
| 108269696 | LOC108269696 | -1.04                  | -1.44  | -0.73  | -0.97  | -0.65   |
| 108269697 | LOC108269697 | -0.08                  | 0.20   | 0.58   | 0.98   | 1.97    |
| 108271589 | selenbp1     | 1.09                   | 0.84   | 0.29   | 0.78   | 0.87    |
| 108269808 | LOC108269808 | 1.32                   | 0.83   | 0.06   | -0.07  | 0.14    |
| 108269809 | LOC108269809 | 1.21                   | 0.88   | 0.88   | 0.56   | 0.72    |
| 108270408 | crip3        | 0.03                   | 0.39   | 0.19   | 0.00   | 1.10    |
| 108270442 | kcnh1        | 0.42                   | 0.62   | 1.01   | 1.82   | 0.60    |
| 108271333 | plekha7      | -1.14                  | -0.52  | -0.24  | -0.41  | -0.37   |
| 108271342 | LOC108271342 | 1.03                   | 0.97   | 0.96   | 0.98   | 0.83    |
| 108271350 | cd82         | 0.78                   | 0.73   | 0.53   | 1.08   | 0.81    |
| 108271006 | LOC108271006 | -1.15                  | -0.96  | -0.87  | -0.93  | -0.93   |
| 108271197 | dok4         | -1.35                  | -0.79  | -0.57  | -0.37  | -0.11   |
| 108271063 | LOC108271063 | -1.17                  | -0.75  | -0.51  | -0.57  | -0.26   |
| 100528164 | vapa         | 1.33                   | 0.75   | 0.37   | 0.47   | 0.38    |
| 108271058 | LOC108271058 | -1.50                  | -0.58  | -0.50  | -0.81  | -0.23   |
| 108270884 | mrvi1        | -0.51                  | -0.48  | 0.18   | 0.60   | 1.38    |
| 108270908 | LOC108270908 | -0.12                  | -0.73  | -1.06  | -0.90  | 0.05    |
| 108271382 | pcdh20       | 0.40                   | -0.14  | 0.02   | 1.18   | 0.95    |
| 108270928 | eml6         | -0.98                  | -0.78  | -0.80  | -1.09  | -0.62   |
| 108271104 | LOC108271104 | -1.41                  | -0.68  | -0.58  | -0.88  | -0.16   |
| 108271388 | LOC108271388 | 1.01                   | 0.74   | 0.20   | 0.40   | 0.52    |
| 100305064 | fadd         | 1.18                   | 0.86   | 0.37   | 0.94   | 0.74    |
| 108271316 | LOC108271316 | -1.40                  | -0.69  | -0.54  | -0.40  | 0.00    |
| 108271220 | serf2        | 1.08                   | 0.85   | 0.53   | 0.75   | 0.93    |
| 108271078 | tmc8         | -1.02                  | -0.47  | -0.12  | 0.31   | 0.16    |
| 108271400 | exog         | -1.05                  | -0.37  | -0.24  | -0.54  | -0.19   |
| 108271236 | plekho2      | 0.44                   | 0.54   | 0.99   | 1.12   | 0.62    |
| 108271441 | aldh1a3      | 0.36                   | 0.28   | 0.13   | 0.82   | 1.00    |
| 108271092 | fah          | 0.83                   | 1.15   | 0.62   | 0.42   | 0.62    |
| 108270987 | cemip        | 1.08                   | 0.40   | 0.07   | 0.86   | 0.88    |
| 108271489 | slc22a17     | -1.27                  | -0.89  | -0.29  | -0.40  | -0.65   |
| 108270585 | LOC108270585 | 1.58                   | 1.15   | 1.42   | 1.64   | 1.01    |
| 100528377 | polr2h       | 1.64                   | 0.11   | 0.43   | 0.43   | 0.60    |
| 108270874 | timm13       | 1.35                   | 0.53   | -0.22  | 0.33   | 0.44    |
| 108271403 | s1pr1        | -0.33                  | -0.63  | -1.23  | -1.00  | -0.62   |

|           |              |       |       |       |       |       |
|-----------|--------------|-------|-------|-------|-------|-------|
| 108271214 | eps15l1      | 1.23  | 1.20  | 1.61  | 1.25  | 1.04  |
| 108271130 | LOC108271130 | 0.49  | 0.42  | 0.26  | 0.80  | 1.07  |
| 108271248 | tpm4         | 1.67  | 0.52  | 0.22  | 0.06  | 0.76  |
| 108271254 | gpc1         | 1.07  | 0.81  | 0.45  | 0.16  | 0.32  |
| 108271035 | uhrf1        | 1.02  | 0.41  | 0.18  | 0.45  | 0.27  |
| 108271250 | cers4        | 1.22  | 0.59  | 0.38  | 0.62  | 0.31  |
| 108271073 | matk         | -1.07 | -0.41 | -0.29 | -0.23 | -0.15 |
| 108270693 | plekhh2      | 1.16  | 0.98  | 0.58  | 0.53  | 0.68  |
| 108270900 | gpr52        | -0.18 | -0.31 | 0.48  | 1.11  | 0.40  |
| 108271044 | LOC108271044 | -0.52 | 0.68  | 0.24  | 1.13  | 0.25  |
| 108271013 | LOC108271013 | 0.72  | 0.73  | 0.95  | 1.56  | 0.97  |
| 108271274 | nr2c2ap      | 1.50  | 0.96  | 1.13  | 0.94  | 0.75  |
| 108271620 | reck         | 1.94  | 0.82  | 0.01  | 0.55  | 0.91  |
| 108271023 | atp5d        | 1.14  | 0.35  | 0.09  | -0.02 | 0.19  |
| 108271412 | fstl3        | 1.19  | 0.26  | -0.42 | -0.08 | -0.08 |
| 100304650 | LOC100304650 | -0.21 | -0.22 | -0.08 | -0.81 | -1.19 |
| 108271291 | LOC108271291 | 1.03  | 0.78  | 0.41  | 0.53  | 0.64  |
| 108271243 | LOC108271243 | 0.95  | 0.68  | 0.75  | 1.17  | 0.48  |
| 108271164 | LOC108271164 | 0.52  | 0.84  | 1.01  | 0.71  | 0.45  |
| 108270510 | LOC108270510 | -0.05 | -0.22 | -0.83 | -0.77 | -1.83 |
| 108270630 | LOC108270630 | 1.02  | 0.96  | 0.58  | 1.41  | 0.77  |
| 108270716 | dnase2b      | -1.05 | -0.55 | -0.13 | -0.03 | -0.15 |
| 108270712 | adgrl4       | 1.89  | 0.88  | 0.44  | 0.28  | 0.83  |
| 108271089 | rab3a        | -0.83 | -0.37 | -0.21 | 0.65  | 1.83  |
| 100528740 | tmem38a      | 0.89  | 0.59  | 0.27  | 0.83  | 1.69  |
| 108271268 | med26        | -0.55 | -1.12 | -0.35 | -0.01 | -0.26 |
| 108271077 | arid3a       | -1.05 | -0.85 | -0.96 | -0.97 | -0.51 |
| 100528544 | ndufs7       | 1.07  | 0.41  | 0.21  | 0.32  | 0.34  |
| 108271198 | gtpbp3       | -0.87 | -0.57 | -0.24 | -1.17 | -0.75 |
| 108271425 | tax1bp3      | 1.23  | 0.69  | -0.01 | 0.01  | 0.31  |
| 108270523 | nrtm         | -0.78 | -1.09 | -0.61 | -0.33 | 0.87  |
| 100529023 | ndufa11      | 1.17  | 0.62  | 0.15  | 0.32  | 0.29  |
| 108271051 | col6a2       | 1.01  | 0.27  | -0.04 | 0.41  | 0.94  |
| 108268083 | LOC108268083 | 1.39  | 0.79  | 0.70  | 1.01  | 0.68  |
| 108270765 | LOC108270765 | -1.11 | -0.36 | -0.14 | -0.24 | 0.25  |
| 108270845 | LOC108270845 | -0.89 | -1.06 | -0.90 | -0.84 | -0.40 |
| 108271845 | itgb1        | 2.05  | 0.65  | 0.23  | 0.65  | 0.86  |
| 108270784 | LOC108270784 | 0.03  | -0.70 | -1.20 | -0.72 | -0.03 |
| 108270745 | LOC108270745 | -1.40 | -0.76 | -0.30 | -0.77 | -0.41 |
| 108270746 | LOC108270746 | -1.82 | -0.70 | -0.29 | -0.37 | -0.62 |
| 108270810 | LOC108270810 | -1.08 | -0.30 | -0.23 | 0.27  | -0.21 |
| 108270768 | LOC108270768 | -1.11 | -0.51 | 0.13  | 0.09  | -0.09 |
| 108270825 | LOC108270825 | 0.74  | 1.06  | 1.38  | 0.95  | 0.41  |
| 108270826 | LOC108270826 | -1.08 | -0.83 | 0.19  | -0.08 | 0.06  |
| 108270680 | LOC108270680 | -1.04 | -0.77 | -0.20 | -0.57 | -0.11 |

|           |              |       |       |       |       |       |
|-----------|--------------|-------|-------|-------|-------|-------|
| 108263468 | LOC108263468 | -1.03 | -0.66 | -0.90 | -0.57 | -0.79 |
| 100528078 | lyrm4        | 1.17  | 0.72  | 0.70  | 0.59  | 0.58  |
| 108271192 | tollip       | 0.22  | -0.15 | -0.11 | 0.34  | 1.22  |
| 108271096 | elp4         | 1.38  | 0.91  | 0.65  | 0.92  | 0.83  |
| 100528408 | tesc         | 0.79  | -0.09 | 0.44  | 0.96  | 1.66  |
| 108271230 | aspm         | 1.16  | 0.46  | -0.06 | 0.22  | 0.08  |
| 108273140 | LOC108273140 | -1.11 | -0.68 | -0.49 | -0.60 | -0.47 |
| 108271605 | LOC108271605 | 1.06  | 0.59  | 0.80  | 0.89  | 0.43  |
| 108272206 | LOC108272206 | 1.06  | 0.97  | 0.43  | 0.96  | 0.89  |
| 108272229 | LOC108272229 | -0.39 | -0.72 | 0.08  | 0.14  | -1.10 |
| 108272227 | LOC108272227 | -1.77 | -0.96 | 0.13  | 0.55  | 0.27  |
| 108271830 | LOC108271830 | -1.32 | -0.50 | -0.01 | 0.03  | -0.19 |
| 108272279 | gabrg3       | 1.38  | 1.11  | 1.12  | 1.63  | 0.41  |
| 108271812 | LOC108271812 | -1.27 | -0.75 | -0.31 | -0.56 | -0.35 |
| 108272011 | pcdh9        | -0.77 | 0.07  | 0.03  | 0.49  | 1.55  |
| 108272128 | LOC108272128 | 1.62  | 0.68  | -0.09 | 0.63  | 0.82  |
| 108271954 | LOC108271954 | -1.16 | -0.78 | -0.70 | -0.92 | -0.78 |
| 108272200 | ddr2         | 1.15  | 0.18  | -0.15 | -0.17 | 0.27  |
| 108271892 | LOC108271892 | -1.21 | -0.64 | -0.35 | 0.40  | -0.23 |
| 108272059 | LOC108272059 | -1.06 | -0.25 | -0.12 | -0.31 | -0.51 |
| 108271955 | pde4b        | -0.52 | 1.02  | -0.28 | -0.23 | 0.30  |
| 108272205 | lrrc40       | 1.24  | 0.79  | -0.09 | 0.52  | 0.47  |
| 108271917 | LOC108271917 | -1.33 | -0.99 | -0.96 | 0.11  | 0.19  |
| 108272013 | LOC108272013 | 2.27  | -0.14 | -0.84 | 0.05  | 0.30  |
| 108271779 | LOC108271779 | 1.34  | 0.95  | 0.90  | 0.76  | 0.73  |
| 108271556 | gpr17        | 1.12  | 0.13  | -1.36 | 0.32  | 0.73  |
| 100528900 | glyg         | 1.05  | 0.89  | 0.61  | 0.40  | 0.39  |
| 108271536 | LOC108271536 | -0.54 | -0.30 | 0.92  | 0.77  | 1.46  |
| 108272203 | LOC108272203 | -1.08 | -0.32 | -0.79 | -0.66 | -0.32 |
| 108271495 | sox14        | 1.38  | 0.76  | 0.83  | 0.76  | 0.24  |
| 108272028 | dtymk        | 1.04  | 0.24  | -0.11 | 0.23  | -0.11 |
| 108272139 | sned1        | 0.32  | 1.09  | 0.29  | 0.20  | 0.41  |
| 108272114 | slco2a1      | 1.32  | 0.78  | -0.09 | 0.22  | 0.56  |
| 108271498 | LOC108271498 | 1.07  | 0.43  | 0.39  | 0.92  | 0.61  |
| 108271507 | rad54l       | -0.35 | -0.72 | -0.92 | -1.02 | -0.59 |
| 100528072 | cf125        | 1.03  | 0.82  | 0.48  | 0.53  | 0.51  |
| 108271574 | LOC108271574 | -1.09 | -0.46 | -0.92 | -0.41 | -0.30 |
| 108271510 | LOC108271510 | -0.94 | -1.33 | -0.44 | 0.08  | -0.37 |
| 108278429 | trpc1        | -0.89 | 0.02  | -0.03 | 0.50  | 1.10  |
| 108272259 | ruvbl1       | 1.20  | 0.39  | -0.20 | 0.63  | 0.45  |
| 108272082 | LOC108272082 | 1.16  | 0.23  | 0.07  | 0.23  | 0.94  |
| 108272083 | sirt4        | 0.85  | 0.75  | 0.87  | 0.71  | 1.02  |
| 108271732 | LOC108271732 | -0.66 | -1.95 | -0.50 | -0.82 | -0.99 |
| 108271893 | LOC108271893 | -1.70 | 0.30  | -0.89 | -0.57 | 0.84  |
| 108272091 | LOC108272091 | -0.63 | -0.37 | -0.88 | -1.18 | -0.50 |

|           |              |       |       |       |       |       |
|-----------|--------------|-------|-------|-------|-------|-------|
| 108271566 | ngf          | 1.34  | 0.33  | 0.65  | 0.29  | 0.48  |
| 108272932 | LOC108272932 | 1.37  | 0.72  | 0.31  | 0.57  | 0.56  |
| 108272033 | LOC108272033 | 0.29  | 0.68  | 0.42  | 0.88  | 1.21  |
| 108271835 | LOC108271835 | -1.10 | -0.67 | -0.21 | -0.23 | -0.03 |
| 108272256 | LOC108272256 | 1.17  | 0.55  | -0.23 | -0.12 | 0.60  |
| 108272046 | shmt2        | 1.34  | 0.60  | 0.34  | 0.39  | 0.51  |
| 100528661 | arfrp1       | 1.26  | 0.63  | 0.61  | 0.79  | 0.91  |
| 108272005 | LOC108272005 | -1.06 | -0.62 | -0.02 | -0.17 | -0.02 |
| 108271963 | znfx1        | -0.82 | -0.90 | -0.40 | -0.66 | -1.30 |
| 108271759 | ncoa5        | -1.07 | -0.67 | -0.59 | -0.75 | -0.84 |
| 100304843 | pltp         | -1.13 | -0.65 | -0.41 | -0.62 | -0.51 |
| 100528218 | ube2c        | 1.19  | 0.38  | 0.03  | 0.22  | 0.08  |
| 108272113 | LOC108272113 | 0.50  | 0.76  | 1.70  | 1.08  | 0.07  |
| 108271871 | pkp1         | 1.07  | 0.79  | 0.33  | 0.46  | 0.28  |
| 108272075 | tulp1        | -1.16 | -0.61 | -0.43 | -0.61 | -0.17 |
| 108271519 | snrpc        | 1.07  | 0.72  | 0.23  | 0.76  | 0.52  |
| 108271966 | LOC108271966 | 0.06  | 0.03  | -0.14 | 0.16  | 1.07  |
| 108271981 | LOC108271981 | 0.12  | 0.17  | -0.46 | -1.15 | -0.20 |
| 108271987 | abhd14b      | 1.03  | 0.90  | 0.62  | 0.29  | 0.34  |
| 108271499 | LOC108271499 | -0.44 | -0.29 | 0.25  | 0.94  | 1.24  |
| 108271979 | LOC108271979 | -1.09 | -0.48 | -0.26 | -0.55 | -0.49 |
| 108271554 | LOC108271554 | -1.30 | -0.47 | -0.19 | -0.82 | -0.38 |
| 108271587 | mitf         | -0.92 | -1.15 | -0.89 | -0.79 | -0.27 |
| 108271924 | gxyt2        | 1.08  | 0.60  | 0.32  | 0.69  | 0.66  |
| 108273245 | LOC108273245 | -1.45 | 1.78  | 0.39  | 0.37  | -0.44 |
| 108273248 | LOC108273248 | 1.17  | 0.91  | 0.79  | 0.69  | 0.58  |
| 100528964 | psmb3        | 1.09  | 0.55  | 0.23  | 0.43  | 0.30  |
| 108272966 | mlph         | -1.15 | -0.75 | -0.63 | -0.89 | -0.82 |
| 108268402 | LOC108268402 | -1.11 | -0.70 | -0.68 | -0.52 | 0.13  |
| 108273053 | LOC108273053 | 0.62  | 0.96  | 0.55  | 1.14  | 0.86  |
| 108271800 | LOC108271800 | 0.11  | 0.22  | 0.83  | 1.04  | 0.48  |
| 108272167 | LOC108272167 | 1.05  | 0.43  | 0.11  | 0.07  | 0.09  |
| 100528851 | esd          | 1.09  | 0.47  | 0.11  | 0.40  | 0.27  |
| 108271988 | LOC108271988 | -1.12 | -0.62 | -0.53 | -0.85 | -0.80 |
| 108272598 | rbl1         | 1.03  | 0.84  | 0.36  | 0.75  | 0.69  |
| 108272602 | atp5e        | 1.14  | 0.76  | 0.51  | 0.42  | 0.39  |
| 108273073 | ahcy         | 1.03  | 0.80  | 0.80  | 0.46  | 0.42  |
| 108270428 | LOC108270428 | -0.14 | -0.77 | 0.16  | -0.94 | -1.36 |
| 108270051 | LOC108270051 | -1.00 | -0.61 | -0.19 | 0.22  | 0.04  |
| 108273301 | LOC108273301 | -0.59 | -0.90 | -0.67 | -0.84 | -1.02 |
| 100528875 | hmox         | 1.25  | 0.75  | 0.23  | -0.04 | -0.30 |
| 108269531 | LOC108269531 | -1.20 | -0.55 | -0.10 | -0.27 | -0.08 |
| 108272727 | dfnb59       | -1.01 | -0.67 | -0.82 | -0.99 | -0.38 |
| 108272335 | ccdc14       | -1.13 | -0.95 | -0.78 | -0.79 | -0.59 |
| 108270211 | LOC108270211 | -1.24 | -1.50 | -0.75 | -0.98 | -0.45 |

|           |              |       |       |       |       |       |
|-----------|--------------|-------|-------|-------|-------|-------|
| 108272377 | LOC108272377 | 0.36  | -0.81 | -1.17 | -0.78 | 0.14  |
| 108272367 | LOC108272367 | -0.57 | 0.61  | -1.15 | -0.71 | 0.71  |
| 108273081 | LOC108273081 | 1.30  | 0.90  | 0.38  | 0.55  | 0.90  |
| 108273173 | LOC108273173 | -1.00 | -0.61 | -0.23 | -0.78 | -0.33 |
| 108272630 | p4hb         | 1.48  | 0.75  | 0.51  | 0.83  | 0.69  |
| 108269928 | luc7l        | -1.06 | -0.72 | -0.41 | -0.61 | -0.56 |
| 108273333 | cbx4         | -0.16 | 0.33  | 0.24  | 0.60  | 1.14  |
| 108272930 | LOC108272930 | 0.14  | 0.04  | 0.00  | 0.41  | 1.38  |
| 108273236 | LOC108273236 | 1.05  | 0.81  | 0.83  | 0.72  | 0.76  |
| 108272639 | LOC108272639 | -1.03 | -0.47 | -0.28 | -0.19 | -0.29 |
| 108272638 | LOC108272638 | 1.54  | 0.92  | 0.62  | 0.67  | 0.42  |
| 108272636 | LOC108272636 | 0.27  | 0.41  | 1.04  | 0.98  | 0.59  |
| 108272454 | LOC108272454 | -1.10 | -0.43 | -0.17 | -0.14 | -0.37 |
| 108272541 | LOC108272541 | 0.08  | 0.28  | 0.42  | 0.51  | 1.03  |
| 108271937 | LOC108271937 | -1.09 | -0.70 | -0.39 | -0.65 | -0.57 |
| 108272724 | LOC108272724 | -0.87 | -1.16 | -0.38 | -0.94 | -0.76 |
| 108272348 | cks1b        | 1.09  | 0.60  | 0.02  | 0.04  | 0.46  |
| 100528772 | s10aa        | 2.32  | 0.92  | 0.48  | -0.21 | -0.17 |
| 108273250 | ndufv1       | 1.07  | 0.64  | 0.11  | 0.29  | 0.28  |
| 108273083 | clk2         | -1.00 | -0.37 | -0.25 | -0.64 | -0.68 |
| 108274409 | LOC108274409 | -0.05 | 0.28  | 0.18  | 1.13  | 0.25  |
| 108272767 | LOC108272767 | -0.82 | -0.93 | -0.79 | -1.12 | -0.72 |
| 100528864 | olah         | 0.94  | 0.96  | 0.94  | 0.93  | 1.01  |
| 108273336 | LOC108273336 | 1.10  | 0.93  | 0.33  | 0.21  | 0.60  |
| 108273253 | LOC108273253 | 1.47  | 0.96  | 0.61  | 0.45  | 0.78  |
| 100528882 | stmn1        | 1.01  | 0.59  | 0.17  | 0.49  | 0.52  |
| 108272358 | LOC108272358 | 0.36  | 0.63  | 0.42  | 1.00  | 0.85  |
| 108273185 | LOC108273185 | 0.90  | 0.59  | 0.70  | 0.93  | 1.01  |
| 108272664 | LOC108272664 | -0.05 | 0.74  | 1.05  | 0.25  | 0.13  |
| 108273167 | tmem64       | 0.16  | 0.39  | 1.01  | 0.47  | 0.95  |
| 100528328 | eif3i        | 1.09  | 0.89  | 0.76  | 0.68  | 0.62  |
| 108272398 | LOC108272398 | 1.55  | 0.46  | 0.66  | 0.99  | 0.52  |
| 100528936 | ndufs6       | 1.10  | 0.60  | 0.32  | 0.35  | 0.45  |
| 108272751 | vars2        | -1.06 | -0.82 | -0.77 | -0.94 | -0.74 |
| 100528986 | znrd1        | 1.21  | 0.14  | 0.95  | 1.12  | 0.87  |
| 108272788 | tmem268      | -1.27 | -0.66 | -0.21 | -0.17 | -0.41 |
| 108273363 | LOC108273363 | -1.05 | -0.46 | -0.82 | -0.68 | -1.00 |
| 108272368 | LOC108272368 | -0.89 | -0.89 | -0.33 | -0.84 | -1.07 |
| 108273319 | LOC108273319 | -1.67 | -0.42 | -0.25 | 0.09  | 0.55  |
| 108272658 | snapin       | 1.15  | 0.79  | 0.77  | 0.60  | 0.44  |
| 108272615 | pex11b       | 0.85  | 0.97  | 1.03  | 0.98  | 0.75  |
| 108272841 | LOC108272841 | 0.34  | 0.51  | 0.22  | 0.89  | 1.30  |
| 108272858 | LOC108272858 | -2.39 | -0.86 | -0.59 | -0.77 | 0.09  |
| 108280565 | rras         | 1.02  | 0.61  | 0.26  | 0.30  | 0.38  |
| 108272838 | LOC108272838 | -1.09 | -0.86 | -0.15 | -0.65 | -0.23 |

|           |              |       |       |       |       |       |
|-----------|--------------|-------|-------|-------|-------|-------|
| 108272834 | LOC108272834 | -1.01 | -0.76 | -0.07 | -0.75 | -0.47 |
| 108272836 | LOC108272836 | -1.05 | -0.46 | -0.04 | -0.24 | -0.74 |
| 108272809 | LOC108272809 | 1.04  | 0.48  | 0.26  | 0.33  | 0.43  |
| 108272808 | mast1        | -1.12 | -0.86 | -0.51 | -0.43 | -0.37 |
| 108272856 | hn1          | 1.05  | 0.60  | 0.31  | 0.20  | 0.37  |
| 108272850 | LOC108272850 | 0.26  | 0.14  | -1.03 | -0.64 | -0.16 |
| 108272866 | LOC108272866 | -0.65 | 0.18  | -0.45 | -1.47 | -0.67 |
| 108273011 | hlf          | 1.11  | 0.61  | 0.78  | 0.79  | 0.33  |
| 108273013 | LOC108273013 | -1.19 | -0.94 | -0.36 | -0.35 | 0.11  |
| 108273010 | LOC108273010 | 1.29  | 0.36  | 0.29  | 0.35  | 0.16  |
| 108273001 | st13         | 1.07  | 0.57  | 0.09  | 0.36  | 0.34  |
| 108280402 | rnf25        | -1.27 | -0.69 | -0.49 | -0.49 | -0.41 |
| 108272977 | LOC108272977 | -1.09 | -0.55 | -0.05 | -0.20 | -0.26 |
| 108273032 | LOC108273032 | 1.28  | 0.45  | 0.79  | 1.33  | 1.02  |
| 108272745 | LOC108272745 | -1.33 | -0.84 | 0.21  | -0.52 | -0.52 |
| 108272490 | LOC108272490 | -1.23 | -0.57 | -0.33 | -0.53 | -0.84 |
| 108272488 | LOC108272488 | -1.22 | -0.80 | -0.73 | -0.74 | -0.93 |
| 108272510 | ccdc134      | 1.54  | 0.47  | 0.36  | 0.75  | 0.49  |
| 108272507 | LOC108272507 | 1.04  | 0.64  | 0.29  | 0.48  | 0.57  |
| 108272500 | sox10        | 1.10  | 0.52  | -0.09 | 0.46  | 0.39  |
| 108272496 | plbd1        | -1.31 | -0.85 | -0.59 | -0.70 | -0.68 |
| 108272945 | LOC108272945 | -1.73 | -1.03 | 3.88  | 0.95  | 0.88  |
| 108272943 | LOC108272943 | -1.01 | -0.31 | -0.14 | -0.67 | -0.28 |
| 108273565 | LOC108273565 | -0.26 | -0.87 | -1.16 | -0.56 | 0.03  |
| 100528669 | ndufb8       | 1.08  | 0.56  | 0.25  | 0.19  | 0.31  |
| 108273525 | exoc7        | -1.10 | -0.74 | -0.47 | -0.57 | -0.68 |
| 108273612 | LOC108273612 | -0.32 | -0.19 | 0.10  | -0.34 | -1.10 |
| 108274012 | LOC108274012 | -0.44 | 0.28  | 1.15  | -0.04 | 0.22  |
| 108276075 | LOC108276075 | 0.71  | 0.60  | 0.41  | 0.46  | 1.42  |
| 108273830 | LOC108273830 | 1.01  | 0.22  | 0.31  | 0.83  | 0.13  |
| 108273895 | LOC108273895 | -0.31 | -0.44 | 0.07  | 1.60  | 0.71  |
| 108273427 | egr2         | 1.13  | 0.50  | 0.00  | 0.86  | 0.21  |
| 108274249 | tmem26       | 0.73  | 0.93  | 0.94  | 0.93  | 1.19  |
| 108273416 | phyhipl      | 2.60  | 1.40  | 0.87  | 1.08  | 0.66  |
| 108273758 | LOC108273758 | 0.19  | -0.03 | -0.20 | -0.31 | -1.10 |
| 108263538 | LOC108263538 | -1.04 | -0.79 | -0.42 | -0.47 | -0.28 |
| 108280902 | LOC108280902 | 1.36  | 0.89  | 0.61  | 0.95  | 0.72  |
| 108274246 | lrrc59       | -0.20 | -1.03 | -0.86 | -0.59 | -0.75 |
| 108274242 | pmp22        | 1.57  | 0.94  | 0.08  | 0.35  | 0.53  |
| 108274321 | LOC108274321 | 0.10  | 0.14  | 0.57  | 0.93  | 1.26  |
| 108273429 | LOC108273429 | 1.16  | 0.60  | 0.67  | 0.59  | 0.02  |
| 108274174 | gprc5c       | 1.16  | 0.71  | 0.24  | 0.76  | 0.62  |
| 100305007 | itln2        | -0.95 | -0.50 | 0.59  | 1.42  | 0.73  |
| 108274296 | LOC108274296 | 1.23  | 0.98  | 0.66  | 0.45  | -0.02 |
| 108274280 | LOC108274280 | 1.25  | 0.48  | 0.23  | 0.85  | 0.49  |

|           |              |       |       |       |       |       |
|-----------|--------------|-------|-------|-------|-------|-------|
| 108273981 | LOC108273981 | 0.19  | 0.25  | 0.32  | 1.12  | 0.63  |
| 108274369 | LOC108274369 | -0.54 | -1.25 | -0.92 | -0.53 | 0.21  |
| 108280870 | LOC108280870 | 1.46  | 0.84  | -0.22 | 0.05  | 0.33  |
| 108273449 | nog          | 2.11  | -0.13 | 0.25  | 0.92  | 0.05  |
| 108273872 | LOC108273872 | 1.02  | 0.32  | 0.20  | -0.07 | 0.00  |
| 108274051 | LOC108274051 | 1.36  | 0.98  | 0.41  | 0.93  | 0.57  |
| 108273795 | slc38a10     | 0.75  | 0.92  | 1.03  | 0.94  | 0.65  |
| 108280933 | LOC108280933 | -0.69 | -1.48 | -0.94 | -0.92 | -0.46 |
| 108273465 | LOC108273465 | 1.17  | 0.42  | -0.36 | -0.03 | 0.03  |
| 108274067 | LOC108274067 | 2.50  | 0.57  | 0.49  | 0.50  | 0.48  |
| 108274068 | LOC108274068 | -0.25 | -0.05 | -1.11 | -0.50 | 0.18  |
| 108274951 | LOC108274951 | 1.43  | 0.61  | 0.45  | 0.16  | 0.63  |
| 108274305 | cpn1         | 1.30  | 0.48  | -0.08 | 0.10  | 0.01  |
| 108273728 | LOC108273728 | -1.61 | -0.30 | 1.40  | 1.82  | 1.11  |
| 108273725 | LOC108273725 | -2.30 | -0.60 | 0.05  | 0.02  | -0.44 |
| 108274318 | LOC108274318 | -0.38 | -0.16 | 0.31  | 0.47  | 1.19  |
| 108273674 | znf668       | 1.43  | 0.89  | 0.78  | 1.00  | 0.66  |
| 108273675 | cdk5rap3     | -0.48 | -0.90 | -0.71 | -0.86 | -1.01 |
| 108273682 | pnpo         | 1.37  | 0.68  | 0.45  | 0.36  | 0.63  |
| 108273685 | tbx21        | 0.00  | -0.22 | 0.62  | 1.53  | 0.17  |
| 108274275 | LOC108274275 | -0.07 | -0.92 | -0.99 | -1.16 | -0.68 |
| 108280807 | akt1s1       | 1.15  | 0.76  | 0.15  | 0.42  | 0.17  |
| 108273441 | LOC108273441 | -0.40 | 0.20  | 0.95  | 1.32  | 0.33  |
| 108274294 | sost         | 2.03  | 0.17  | -0.28 | 0.33  | 0.07  |
| 108274127 | LOC108274127 | 1.29  | 0.86  | 0.29  | 0.55  | 0.56  |
| 100528190 | josd1        | 1.01  | 0.50  | 0.43  | 0.50  | 0.64  |
| 108274361 | kctd17       | 0.63  | 0.46  | 0.10  | 0.54  | 1.56  |
| 108273994 | tomm22       | 1.27  | 0.68  | 0.30  | 0.42  | 0.34  |
| 108274292 | LOC108274292 | -0.76 | -0.97 | -1.40 | -0.93 | 0.42  |
| 108273962 | bhlha15      | 0.64  | 1.33  | 0.55  | 0.47  | 0.73  |
| 108273657 | usp42        | -1.06 | -0.79 | -0.42 | -0.48 | -0.55 |
| 100304861 | acta2        | 1.54  | 0.97  | 0.51  | 0.40  | 0.74  |
| 108273448 | LOC108273448 | -0.11 | 0.29  | 0.77  | 0.90  | 2.68  |
| 108274155 | asah2        | -1.10 | -0.48 | -0.08 | -0.39 | -0.12 |
| 108274244 | cep55        | 1.30  | 0.63  | -0.11 | 0.33  | 0.10  |
| 108274303 | nt5m         | 2.06  | 1.40  | 1.47  | 1.56  | 0.96  |
| 108274342 | LOC108274342 | -1.12 | -0.33 | -0.94 | 0.26  | 0.20  |
| 108273949 | LOC108273949 | 0.69  | 0.47  | 0.42  | 0.79  | 1.92  |
| 100304995 | cd79b        | -0.39 | -0.02 | 0.65  | 0.71  | 1.30  |
| 108274041 | LOC108274041 | -0.65 | -0.71 | -0.21 | -0.89 | -2.19 |
| 100304733 | LOC100304733 | 1.19  | 0.77  | 0.62  | 0.61  | 0.56  |
| 108273586 | LOC108273586 | 0.65  | 0.43  | 0.93  | 1.75  | -0.14 |
| 108273573 | LOC108273573 | 0.03  | 0.09  | 1.03  | -0.28 | -0.31 |
| 108273575 | smarcd2      | 0.95  | 1.07  | 0.94  | 0.84  | 0.81  |
| 108273574 | LOC108273574 | -1.28 | -0.73 | -0.78 | -0.96 | -0.36 |

|           |              |       |       |       |       |       |
|-----------|--------------|-------|-------|-------|-------|-------|
| 108273576 | LOC108273576 | -1.48 | -0.91 | -0.62 | -0.53 | -0.63 |
| 108273577 | LOC108273577 | -0.59 | -0.18 | 0.72  | 1.28  | 0.45  |
| 100528084 | elob         | 1.05  | 0.60  | 0.17  | 0.55  | 0.47  |
| 108274178 | LOC108274178 | -1.15 | -0.60 | -0.53 | -0.92 | -0.73 |
| 108273803 | LOC108273803 | -1.06 | -0.85 | -0.48 | -0.78 | -0.97 |
| 108273810 | oplah        | -1.24 | -0.64 | -0.28 | -0.58 | -0.25 |
| 108274251 | LOC108274251 | 0.13  | 1.03  | 5.21  | 0.52  | -0.56 |
| 108274252 | LOC108274252 | 1.51  | 1.47  | 1.59  | 2.01  | 2.89  |
| 108273778 | LOC108273778 | -0.85 | -0.40 | -0.49 | -0.85 | -1.04 |
| 108273773 | LOC108273773 | 1.44  | 0.49  | 0.28  | 0.25  | 0.43  |
| 108273789 | c13h10orf88  | 1.30  | 0.60  | 0.17  | 0.32  | 0.12  |
| 108274835 | LOC108274835 | 0.11  | 0.40  | -1.19 | 0.06  | 0.10  |
| 108277488 | LOC108277488 | -0.09 | 0.30  | 0.77  | 1.19  | 0.36  |
| 108274846 | LOC108274846 | -1.17 | 0.51  | -0.76 | -0.70 | -0.22 |
| 108274859 | LOC108274859 | 1.06  | 0.55  | 0.18  | 0.18  | 0.32  |
| 108274792 | tert         | -0.51 | -0.59 | -1.06 | -0.91 | -0.79 |
| 108274821 | LOC108274821 | 0.09  | 0.02  | 0.28  | 0.51  | 1.00  |
| 108274825 | LOC108274825 | -0.02 | 0.22  | 0.82  | 1.04  | 0.96  |
| 108274794 | LOC108274794 | 0.25  | 0.36  | 0.71  | 0.26  | 1.19  |
| 108274827 | LOC108274827 | -1.25 | -0.70 | 0.13  | 0.35  | 0.20  |
| 108274852 | LOC108274852 | -1.14 | -0.47 | -0.45 | 0.54  | 0.18  |
| 108274659 | LOC108274659 | -1.28 | -0.75 | 0.02  | -0.02 | 0.42  |
| 108274553 | LOC108274553 | -2.09 | -0.94 | -0.89 | -0.76 | -0.59 |
| 108275350 | LOC108275350 | 0.14  | 0.27  | 0.85  | 1.76  | 0.89  |
| 108274877 | LOC108274877 | 1.54  | 0.83  | 0.23  | 0.56  | 0.48  |
| 108274860 | LOC108274860 | 0.11  | -0.33 | -0.62 | -0.95 | -1.91 |
| 108274885 | LOC108274885 | 0.28  | 0.20  | 0.70  | 1.12  | 0.36  |
| 108274893 | LOC108274893 | -1.53 | -0.60 | -0.36 | -0.12 | 0.01  |
| 108274856 | LOC108274856 | -1.41 | 0.32  | -0.21 | 0.39  | 0.70  |
| 108274841 | LOC108274841 | 0.69  | 0.51  | -0.04 | 0.36  | 1.12  |
| 108274881 | LOC108274881 | 1.01  | 0.62  | -0.03 | -0.61 | -0.09 |
| 108275257 | fam135b      | -0.08 | -0.08 | 0.05  | 0.39  | 1.08  |
| 108264298 | LOC108264298 | -1.06 | -0.91 | -0.45 | -0.55 | -0.08 |
| 108274711 | LOC108274711 | -1.06 | -0.71 | -0.62 | -0.83 | -0.69 |
| 108274477 | sncb         | -0.18 | -0.35 | 0.25  | 0.88  | 1.97  |
| 108274554 | LOC108274554 | -0.81 | 0.76  | 0.81  | 0.76  | 1.17  |
| 108269801 | LOC108269801 | -0.94 | -0.92 | -0.58 | -1.19 | -0.71 |
| 108258188 | ramp2        | 1.37  | 0.36  | 0.22  | 0.32  | 0.58  |
| 108275443 | LOC108275443 | -1.01 | -0.55 | 0.02  | -0.16 | 0.01  |
| 108275426 | LOC108275426 | 1.85  | 0.79  | -0.31 | 0.55  | 0.44  |
| 108275342 | LOC108275342 | 1.32  | 0.32  | 0.61  | 0.26  | -0.33 |
| 108275099 | LOC108275099 | -1.02 | -0.97 | -0.90 | -0.92 | -0.11 |
| 108274444 | LOC108274444 | 2.08  | 0.67  | -0.29 | 0.79  | 0.11  |
| 108256285 | LOC108256285 | -1.59 | -1.00 | -0.52 | -0.85 | -0.92 |
| 108274485 | LOC108274485 | 1.07  | 0.63  | 0.59  | 0.78  | 0.98  |



|           |              |       |       |       |       |       |
|-----------|--------------|-------|-------|-------|-------|-------|
| 108275251 | LOC108275251 | 1.04  | 0.72  | 0.85  | 0.90  | 0.29  |
| 108274953 | gxylt1       | 1.33  | 0.98  | 0.60  | 0.79  | 0.58  |
| 108275288 | adamts20     | 1.32  | 0.90  | 0.59  | 0.67  | 0.51  |
| 100528782 | kiaa0101     | 1.02  | 0.25  | -0.04 | -0.07 | -0.11 |
| 100528313 | cd151        | 2.55  | 0.48  | 0.50  | 0.62  | 0.27  |
| 108274946 | ccdc77       | -1.02 | -0.86 | -0.68 | -0.96 | -0.70 |
| 108275320 | LOC108275320 | -0.40 | -1.42 | -1.39 | -0.67 | 0.27  |
| 108275321 | LOC108275321 | -0.73 | -1.07 | -0.37 | -0.62 | -0.78 |
| 108275276 | c14h11orf96  | 1.33  | 0.74  | 0.12  | 0.21  | 0.21  |
| 108275383 | hsd17b12     | -0.73 | -0.71 | -0.88 | -1.09 | -0.93 |
| 108275327 | LOC108275327 | -1.05 | -0.44 | -0.58 | -0.54 | -0.36 |
| 108275237 | pot1         | -1.01 | -0.49 | -0.48 | -0.74 | -0.70 |
| 108275019 | LOC108275019 | 0.20  | 0.10  | 1.22  | 0.50  | 0.03  |
| 100528600 | tpm1         | 1.13  | -0.04 | -0.11 | -0.10 | 0.31  |
| 108275032 | rora         | -1.19 | -0.68 | -0.39 | -0.81 | -0.65 |
| 100305018 | anxa2        | 1.51  | 0.75  | 0.15  | -0.07 | -0.03 |
| 108275226 | bnip2        | 1.13  | 0.77  | 0.49  | 0.99  | 0.57  |
| 108275431 | LOC108275431 | -0.99 | -1.15 | -0.88 | -0.69 | -0.61 |
| 108275268 | lrrc61       | -1.01 | -0.38 | -0.44 | -0.33 | 0.32  |
| 108275119 | sh2d7        | -1.33 | -0.52 | -0.47 | 0.07  | 0.18  |
| 108275239 | sema7a       | 0.08  | -0.16 | -0.38 | 0.28  | 1.04  |
| 108275023 | ano9         | -1.07 | -0.71 | -0.37 | -0.16 | 0.20  |
| 108275326 | LOC108275326 | -1.07 | -0.62 | -0.46 | -0.57 | -0.64 |
| 108274969 | LOC108274969 | 1.02  | 0.87  | 0.26  | 0.32  | 0.44  |
| 108275035 | LOC108275035 | -1.13 | -0.83 | -0.48 | -0.51 | -0.66 |
| 108274452 | fjx1         | 1.48  | 0.24  | 0.02  | 0.41  | 0.10  |
| 108274958 | rassf8       | 0.99  | 0.96  | 0.77  | 1.04  | 0.56  |
| 108259325 | LOC108259325 | -1.47 | -0.87 | -0.88 | -0.63 | -0.41 |
| 108274466 | LOC108274466 | 1.11  | 0.82  | 0.44  | 0.30  | 0.25  |
| 108275003 | LOC108275003 | 1.62  | 0.69  | 0.69  | 0.74  | 0.54  |
| 108274724 | ptprj        | -0.52 | -0.23 | 0.07  | 0.73  | 1.40  |
| 108275128 | cpt1a        | -0.47 | -0.37 | -0.37 | -1.38 | -0.99 |
| 108275076 | b4galnt4     | -1.14 | -0.85 | -0.58 | -0.09 | -0.19 |
| 108259609 | rac3         | 1.03  | 0.74  | 0.13  | 0.07  | 0.31  |
| 108275151 | LOC108275151 | -1.70 | -0.89 | -0.37 | -1.50 | -0.02 |
| 108274464 | LOC108274464 | 0.47  | 0.51  | -0.38 | -0.85 | -1.13 |
| 108274931 | LOC108274931 | 1.08  | 0.29  | 0.05  | 0.17  | 0.76  |
| 108274696 | slc35a4      | 1.09  | 0.57  | 0.71  | 0.53  | 0.58  |
| 100526732 | csflr        | -1.12 | -0.83 | -0.61 | -0.77 | -0.72 |
| 108274435 | exosc3       | 1.18  | 0.56  | -0.15 | 0.47  | -0.06 |
| 108275370 | smyd5        | 1.33  | 0.86  | 0.55  | 0.96  | 0.85  |
| 108274673 | LOC108274673 | -1.05 | -0.57 | -0.45 | -0.25 | -0.37 |
| 108274677 | mars2        | 0.91  | 0.66  | 0.54  | 1.18  | 0.14  |
| 108274458 | LOC108274458 | 0.64  | -0.33 | -1.10 | -0.83 | 0.09  |
| 108275433 | LOC108275433 | 0.87  | 1.24  | 0.72  | 0.80  | 0.44  |

|           |              |       |       |       |       |       |
|-----------|--------------|-------|-------|-------|-------|-------|
| 108275341 | LOC108275341 | -0.72 | -0.67 | -0.56 | -0.92 | -1.51 |
| 108274926 | LOC108274926 | 1.27  | 0.86  | 0.22  | 0.35  | -0.11 |
| 108275428 | atp10b       | -1.15 | -0.82 | 0.29  | 0.13  | -0.62 |
| 108274683 | LOC108274683 | 0.58  | 0.75  | 0.81  | 0.75  | 1.17  |
| 108274642 | LOC108274642 | -1.04 | -0.48 | -0.24 | -0.30 | -1.58 |
| 108274630 | plxnb2       | 0.74  | 0.91  | 1.14  | 0.94  | 0.79  |
| 100304997 | ppib         | 1.28  | 0.80  | 0.47  | 0.52  | 0.58  |
| 108274734 | tmem138      | -0.35 | -0.88 | -0.31 | -1.07 | -0.74 |
| 108275412 | LOC108275412 | 1.59  | 0.88  | -0.04 | 0.30  | 0.30  |
| 108275312 | LOC108275312 | -1.37 | -0.55 | -0.52 | -0.22 | -0.03 |
| 100528350 | btg1         | -1.30 | -0.72 | -0.67 | -0.93 | -0.71 |
| 108274747 | dram1        | -1.17 | -0.79 | -0.41 | -0.10 | -0.33 |
| 108281104 | tmem98       | -1.79 | -0.85 | -0.32 | -1.05 | -1.36 |
| 108275027 | gsap         | -1.25 | -0.59 | -0.25 | -0.47 | -0.39 |
| 108275026 | ccdc146      | -1.31 | -1.00 | -0.39 | -0.76 | -0.39 |
| 108274451 | LOC108274451 | -0.28 | -0.04 | 0.35  | -0.02 | 1.36  |
| 108275659 | LOC108275659 | -1.18 | -0.63 | -0.08 | -0.33 | -0.46 |
| 108275666 | LOC108275666 | 2.42  | 0.76  | -0.44 | 0.53  | 0.49  |
| 108275500 | LOC108275500 | -0.76 | -0.05 | 0.53  | 1.02  | 0.91  |
| 108276297 | ada          | 0.31  | 0.01  | -0.51 | -0.85 | -1.19 |
| 108275551 | LOC108275551 | -1.18 | -0.53 | -0.21 | -0.22 | -0.13 |
| 108276296 | LOC108276296 | 2.05  | 0.89  | 0.67  | 0.36  | 0.58  |
| 108276410 | fam132a      | 1.28  | 0.30  | -0.14 | -0.03 | -0.32 |
| 108276725 | LOC108276725 | 1.04  | 0.48  | 0.91  | -0.03 | 0.54  |
| 108275987 | cbx5         | 1.77  | 0.85  | 0.37  | 0.84  | 0.69  |
| 108275984 | nfe2         | -1.00 | -0.49 | -0.29 | -0.70 | -0.16 |
| 108256206 | LOC108256206 | 1.28  | 0.65  | 0.52  | 0.54  | 0.14  |
| 108275524 | LOC108275524 | 1.28  | 0.98  | 0.93  | 0.92  | 0.77  |
| 108256211 | LOC108256211 | -0.04 | -0.28 | -0.29 | -1.37 | -0.78 |
| 108276442 | LOC108276442 | -0.85 | -1.04 | -0.85 | -0.60 | -0.47 |
| 108263562 | LOC108263562 | -1.04 | -0.90 | -0.74 | -0.56 | -0.38 |
| 108256178 | rabep2       | 1.29  | 0.96  | 0.88  | 0.98  | 0.56  |
| 108275923 | LOC108275923 | -1.86 | -0.75 | -1.20 | -1.22 | -0.28 |
| 108276376 | LOC108276376 | -0.97 | -0.56 | -0.64 | -1.11 | -0.94 |
| 108276412 | ndnf         | 0.29  | -0.10 | -1.15 | 0.05  | -0.11 |
| 108276409 | LOC108276409 | 1.01  | 0.77  | 0.80  | 0.84  | 0.66  |
| 108275601 | LOC108275601 | -1.13 | -0.19 | -0.44 | 0.81  | 0.69  |
| 108276393 | LOC108276393 | 1.66  | 0.68  | 0.34  | 0.71  | 0.67  |
| 108276474 | LOC108276474 | 0.01  | 0.56  | 2.04  | -0.24 | -5.26 |
| 108276415 | LOC108276415 | 1.02  | -0.29 | -0.09 | -0.27 | -0.03 |
| 108276118 | c15h1orf52   | 1.12  | 0.72  | 0.51  | 0.57  | 0.59  |
| 108275753 | LOC108275753 | 1.21  | 0.89  | 0.52  | 0.67  | 0.61  |
| 108275754 | LOC108275754 | -1.02 | -0.25 | -0.32 | -0.56 | -0.40 |
| 108275756 | LOC108275756 | -1.03 | -0.80 | -0.65 | -0.53 | -0.61 |
| 108275759 | reps2        | -1.32 | -0.58 | -0.30 | -0.61 | -0.81 |

|           |              |       |       |       |       |       |
|-----------|--------------|-------|-------|-------|-------|-------|
| 108276105 | rnf146       | 1.05  | 0.82  | 0.63  | 0.79  | 0.62  |
| 108256586 | cnp          | 1.08  | 0.58  | 0.33  | 0.40  | 0.47  |
| 101154681 | ddx58        | -0.56 | -0.88 | -0.63 | -0.95 | -1.96 |
| 108275824 | LOC108275824 | -0.53 | -0.62 | -0.81 | -1.03 | -0.82 |
| 108276448 | LOC108276448 | 1.15  | 0.82  | 0.43  | 0.60  | 0.50  |
| 108276000 | LOC108276000 | -0.73 | -0.89 | -1.14 | -0.85 | -0.85 |
| 108275692 | LOC108275692 | -1.30 | -0.97 | -0.55 | -0.72 | -0.65 |
| 101154682 | dhx58        | -0.60 | -0.77 | -0.25 | -0.58 | -1.45 |
| 108275687 | LOC108275687 | 0.72  | 0.92  | 0.58  | 0.39  | 1.16  |
| 108276094 | LOC108276094 | -1.24 | 0.12  | 0.03  | -0.33 | -0.32 |
| 100304655 | LOC100304655 | 1.09  | 0.59  | 0.07  | 0.32  | 0.86  |
| 108279147 | LOC108279147 | -1.01 | -0.55 | -0.05 | -0.19 | -0.05 |
| 108275498 | LOC108275498 | 0.62  | 0.57  | 1.08  | 0.52  | 0.48  |
| 108275875 | sulf2        | 1.02  | 0.84  | 0.34  | 0.83  | 0.64  |
| 108276444 | sla2         | -1.35 | -0.73 | -0.47 | -0.51 | 0.27  |
| 108275509 | sox18        | 1.45  | 0.76  | 0.19  | 0.78  | 0.88  |
| 108275976 | LOC108275976 | -1.04 | -0.65 | -0.24 | -0.12 | -0.01 |
| 108276377 | LOC108276377 | -1.10 | -0.55 | -0.56 | -0.74 | -0.65 |
| 108276244 | LOC108276244 | 1.12  | 0.43  | 0.21  | 0.51  | 0.40  |
| 100528952 | pdpfb        | 1.24  | 0.66  | 0.34  | 0.51  | 0.53  |
| 108276067 | pm20d1       | 2.31  | 1.62  | 1.49  | 1.46  | 1.36  |
| 108275954 | LOC108275954 | 1.13  | 0.73  | 0.23  | 0.16  | 0.25  |
| 108275532 | ebp          | 1.07  | 0.41  | -0.50 | -0.53 | -0.40 |
| 108276487 | LOC108276487 | -1.12 | -0.78 | -0.24 | -0.09 | 0.25  |
| 108276435 | LOC108276435 | -1.37 | -0.85 | -0.28 | -0.07 | -0.27 |
| 108276051 | LOC108276051 | 1.46  | 0.77  | 0.50  | 0.71  | 0.70  |
| 108276422 | LOC108276422 | -0.87 | -0.52 | -1.02 | -0.91 | -0.84 |
| 108275589 | LOC108275589 | 1.52  | 0.96  | 0.14  | 0.86  | 0.61  |
| 108276128 | LOC108276128 | -1.42 | -0.99 | -0.56 | -0.97 | -0.48 |
| 108260503 | cacnb1       | -0.59 | -0.04 | -0.07 | 0.16  | 1.22  |
| 108260527 | LOC108260527 | -1.20 | 0.57  | -0.15 | 0.34  | 0.76  |
| 108276195 | LOC108276195 | 1.64  | 0.59  | 0.02  | 0.28  | 0.38  |
| 108276405 | ctnnbip1     | 1.19  | 0.50  | -0.04 | 0.06  | 0.17  |
| 108275858 | ube4b        | -1.07 | -0.52 | -0.22 | -0.29 | -0.37 |
| 108276249 | pgd          | 1.10  | 0.61  | -0.24 | 0.46  | 0.00  |
| 108275950 | LOC108275950 | 0.81  | 0.80  | 0.78  | 1.07  | 0.54  |
| 108275490 | dhh          | 1.54  | 0.76  | 0.19  | 0.40  | 0.19  |
| 108276465 | tmem107      | 0.79  | 0.57  | 0.46  | 1.05  | 0.71  |
| 108276383 | LOC108276383 | -1.18 | 0.96  | 0.08  | 0.43  | 0.31  |
| 108260386 | phb          | 1.16  | 0.47  | 0.18  | 0.51  | 0.36  |
| 108275794 | LOC108275794 | 2.33  | 1.03  | 1.47  | 1.74  | 3.11  |
| 108275480 | LOC108275480 | -2.53 | -0.93 | -0.97 | -1.00 | -0.06 |
| 108276202 | LOC108276202 | -1.20 | -0.80 | -0.55 | -0.75 | -0.77 |
| 108276330 | LOC108276330 | -0.80 | -0.55 | -0.73 | -1.00 | -0.48 |
| 108261071 | LOC108261071 | 0.98  | 0.70  | 1.00  | 1.30  | 3.00  |

|           |              |       |       |       |       |       |
|-----------|--------------|-------|-------|-------|-------|-------|
| 108276325 | gdi1         | 0.84  | 0.62  | 0.22  | 0.47  | 1.08  |
| 108279461 | LOC108279461 | 0.26  | -0.29 | -0.55 | -0.95 | -1.41 |
| 108276880 | LOC108276880 | 1.17  | 0.45  | 0.26  | -0.03 | 0.04  |
| 108276884 | LOC108276884 | 1.18  | 0.70  | 0.32  | 0.31  | 0.39  |
| 108277069 | LOC108277069 | 0.93  | 0.54  | 0.56  | 0.62  | 1.17  |
| 108276992 | ndufa8       | 1.27  | 0.72  | 0.27  | 0.51  | 0.50  |
| 108276876 | LOC108276876 | 1.30  | 0.75  | 0.40  | 0.85  | 0.62  |
| 108277156 | LOC108277156 | 0.52  | 0.48  | 0.32  | 0.65  | 1.40  |
| 108276525 | LOC108276525 | 0.39  | 1.01  | 0.26  | -0.07 | 0.20  |
| 108276967 | asb16        | -1.11 | -0.65 | -0.48 | -0.15 | -0.29 |
| 108277117 | unc13b       | 0.06  | 0.28  | 0.51  | 0.82  | 1.04  |
| 108277175 | fam166b      | -1.60 | -0.87 | -1.69 | -1.64 | -0.36 |
| 108277033 | depdc5       | -1.09 | -0.58 | -0.46 | -0.62 | -0.66 |
| 108277015 | LOC108277015 | 0.89  | 1.05  | 0.88  | 0.32  | 0.97  |
| 108276523 | LOC108276523 | -1.04 | -0.87 | -0.25 | 0.24  | 0.34  |
| 108277306 | hven1        | 0.51  | 0.65  | 0.43  | 0.78  | 1.00  |
| 108276893 | LOC108276893 | 1.44  | 0.52  | -0.38 | 0.46  | 0.38  |
| 108276849 | LOC108276849 | -0.56 | -0.22 | -0.44 | 0.50  | 1.51  |
| 100304636 | pcna         | 1.16  | 0.21  | -0.23 | 0.16  | 0.21  |
| 108260900 | LOC108260900 | 1.04  | 0.58  | 0.44  | 0.38  | 0.45  |
| 108277267 | sh3bp2       | -1.33 | -0.42 | -0.23 | -0.36 | -0.53 |
| 108277268 | LOC108277268 | 0.41  | 0.90  | 1.61  | 1.25  | 1.23  |
| 108276545 | LOC108276545 | 1.79  | 0.38  | 0.29  | 0.12  | 0.14  |
| 108277161 | LOC108277161 | 1.42  | 0.76  | 0.37  | 0.68  | 0.80  |
| 108259701 | LOC108259701 | 1.44  | 0.85  | 0.13  | 0.42  | 0.49  |
| 108276560 | lyrm7        | 1.27  | 0.58  | 0.04  | 0.79  | 0.53  |
| 108276597 | diras2       | 0.35  | 0.31  | 0.10  | 0.61  | 1.51  |
| 100528519 | lysc         | -0.15 | 0.19  | 0.69  | 1.33  | 0.50  |
| 100528178 | reep5        | 1.09  | 0.70  | 0.41  | 0.70  | 0.72  |
| 108276716 | LOC108276716 | 1.96  | 0.95  | 0.21  | 0.31  | 0.88  |
| 108264462 | LOC108264462 | 0.55  | 1.19  | 0.87  | 0.55  | 0.49  |
| 108277119 | LOC108277119 | 1.18  | 0.18  | 0.75  | 0.59  | 0.27  |
| 108277031 | LOC108277031 | -1.00 | -0.94 | -0.58 | -0.21 | -0.54 |
| 108276543 | LOC108276543 | -0.79 | -1.34 | -0.91 | -0.16 | 0.45  |
| 108276775 | dlg2         | -0.99 | -0.75 | -0.71 | -1.06 | -0.53 |
| 108277314 | LOC108277314 | 1.11  | 0.27  | 0.22  | 0.27  | 0.59  |
| 108277269 | pknox2       | -0.73 | -0.82 | -0.58 | -1.07 | -0.11 |
| 100529047 | v26bl        | 1.49  | 0.74  | 0.58  | 0.90  | 0.92  |
| 108276957 | LOC108276957 | -1.07 | -0.71 | -0.37 | -0.27 | -0.23 |
| 108277224 | LOC108277224 | 1.46  | 0.89  | 0.38  | 0.87  | 0.43  |
| 100528757 | tmem167a     | 1.17  | 0.57  | 0.56  | 0.34  | 0.67  |
| 108276682 | LOC108276682 | -1.10 | -0.85 | -0.69 | -0.46 | -0.04 |
| 100528456 | rfc3         | 1.43  | 0.51  | 0.31  | 0.77  | 0.27  |
| 108277146 | fry          | -1.13 | -0.57 | -0.54 | -0.76 | -0.73 |
| 108277347 | LOC108277347 | -1.08 | -0.55 | -0.39 | -0.70 | -0.98 |

|           |              |       |       |       |       |       |
|-----------|--------------|-------|-------|-------|-------|-------|
| 108276839 | LOC108276839 | -1.18 | -0.19 | 0.16  | -0.24 | -0.45 |
| 108276908 | LOC108276908 | 1.00  | 1.73  | 0.46  | 1.08  | 0.57  |
| 100304697 | il1b         | -1.12 | -0.37 | -0.33 | -0.31 | -0.10 |
| 100528960 | vdac2        | 1.54  | 0.72  | 0.09  | 0.45  | 0.37  |
| 108276717 | cdk2ap1      | 1.13  | 0.74  | 0.63  | 0.81  | 0.66  |
| 100528622 | denr         | 1.32  | 0.74  | 0.23  | 0.36  | 0.44  |
| 108264536 | LOC108264536 | -0.06 | 0.99  | 1.61  | 0.74  | 0.62  |
| 108277078 | ogdh         | -0.72 | -0.06 | 1.10  | 0.61  | 0.00  |
| 100528931 | mdh2         | 1.20  | 0.58  | 0.35  | 0.57  | 0.35  |
| 108258393 | LOC108258393 | -0.64 | -0.99 | -1.78 | -0.43 | 0.05  |
| 108276660 | prdm15       | -1.18 | -0.57 | -0.59 | -0.81 | -0.76 |
| 108276750 | LOC108276750 | 1.31  | 0.40  | -0.08 | 0.33  | 0.01  |
| 100528631 | lhfp         | 1.47  | 0.45  | 0.10  | 0.77  | 0.76  |
| 108277319 | LOC108277319 | -0.49 | -0.19 | -0.70 | 0.18  | 1.35  |
| 108277343 | LOC108277343 | 1.08  | 0.15  | 0.09  | 0.29  | 0.34  |
| 108277141 | LOC108277141 | -0.96 | -0.83 | -0.24 | -0.45 | -1.00 |
| 108277142 | LOC108277142 | -1.49 | -0.99 | -0.26 | -0.52 | -0.78 |
| 108258908 | LOC108258908 | 0.45  | 0.73  | 0.67  | 1.06  | 0.56  |
| 108277214 | LOC108277214 | -1.29 | -0.78 | -0.50 | -0.32 | -0.28 |
| 100874534 | ppia         | 1.43  | 0.90  | 0.47  | 0.47  | 0.45  |
| 108277507 | LOC108277507 | -1.32 | -0.61 | -0.82 | -0.09 | -0.13 |
| 108278399 | LOC108278399 | 1.39  | -0.34 | -0.89 | -0.62 | -0.20 |
| 108278012 | u2surp       | -1.10 | -0.72 | -0.57 | -0.81 | -0.75 |
| 108256653 | LOC108256653 | 1.09  | 0.22  | -0.40 | -0.14 | 0.13  |
| 108278083 | LOC108278083 | -1.34 | -0.82 | -0.44 | -0.43 | -0.71 |
| 108280830 | LOC108280830 | -0.70 | -0.52 | 0.01  | -1.14 | -0.99 |
| 100528263 | ggct         | 1.25  | 0.85  | 0.77  | 0.16  | 0.19  |
| 108278033 | cdk14        | 2.16  | 0.85  | 0.28  | 0.99  | 1.73  |
| 108273894 | LOC108273894 | 0.39  | 0.13  | -0.47 | 0.35  | 1.08  |
| 108277308 | LOC108277308 | 1.03  | 0.74  | 0.22  | 0.36  | 0.42  |
| 108277122 | LOC108277122 | -1.11 | -0.69 | -0.60 | -0.54 | -0.19 |
| 108277123 | samsn1       | -1.11 | -0.57 | -0.22 | -0.36 | -0.03 |
| 108277089 | LOC108277089 | 0.39  | 1.03  | 0.89  | 0.37  | 0.83  |
| 108276681 | bhlha9       | 0.22  | 2.62  | 1.66  | 1.00  | 0.27  |
| 108276972 | LOC108276972 | 0.06  | -0.69 | -1.01 | -0.93 | -0.10 |
| 108276974 | LOC108276974 | -0.11 | 0.17  | 0.44  | 0.83  | 1.17  |
| 108276818 | LOC108276818 | -1.21 | -0.02 | 0.03  | -0.01 | 0.33  |
| 108277052 | spin1        | 1.06  | 0.72  | 0.68  | 0.70  | 0.40  |
| 108258433 | LOC108258433 | 1.67  | 0.92  | -0.02 | 0.68  | 0.36  |
| 108278047 | LOC108278047 | -1.25 | -0.23 | -0.54 | -0.52 | -0.76 |
| 108278084 | LOC108278084 | -1.02 | -0.09 | 0.06  | -0.25 | -0.57 |
| 108277530 | LOC108277530 | -0.04 | -0.05 | -0.35 | -2.51 | -1.48 |
| 108258438 | nr1d1        | 0.01  | -0.38 | 0.16  | 0.90  | 1.47  |
| 108278342 | brca2        | -0.62 | -0.75 | -0.72 | -1.11 | -0.82 |
| 108277425 | kiaa1456     | -0.33 | -0.29 | -0.41 | -1.07 | -0.27 |

|           |              |       |       |       |       |       |
|-----------|--------------|-------|-------|-------|-------|-------|
| 108278402 | LOC108278402 | 1.06  | 0.53  | 0.48  | 0.68  | 0.43  |
| 108277431 | LOC108277431 | -1.35 | 0.63  | 2.07  | 0.03  | 0.18  |
| 108277944 | tekt1        | -1.07 | -0.59 | -0.34 | -0.80 | -0.66 |
| 108277729 | LOC108277729 | 1.34  | 0.97  | 0.09  | 0.60  | 0.77  |
| 108277655 | LOC108277655 | 1.41  | 0.75  | 0.70  | 0.65  | 0.58  |
| 108277650 | LOC108277650 | 0.77  | 0.96  | 0.88  | 1.36  | 0.95  |
| 108273948 | LOC108273948 | 1.50  | 0.75  | 0.27  | 0.59  | 0.82  |
| 108277434 | LOC108277434 | -1.16 | -0.62 | -0.45 | 0.42  | -0.77 |
| 108277929 | LOC108277929 | 0.51  | 0.46  | 0.37  | 1.03  | 0.72  |
| 108277720 | LOC108277720 | 0.56  | 0.82  | 0.56  | 0.74  | 1.05  |
| 108259915 | slc25a17     | 1.44  | 0.83  | -0.32 | 0.64  | -0.08 |
| 108278156 | LOC108278156 | -0.39 | 1.43  | 0.33  | 0.85  | 0.90  |
| 108278153 | LOC108278153 | -0.24 | -0.77 | -0.19 | -0.56 | -1.04 |
| 108277567 | LOC108277567 | -0.20 | 0.09  | 0.18  | 1.21  | 0.15  |
| 108278134 | zbtb32       | 0.17  | 0.34  | 1.12  | 0.92  | 0.54  |
| 100528943 | prvu         | -0.63 | -0.82 | -1.01 | -0.43 | 0.08  |
| 108277899 | agl          | 0.63  | 1.13  | 0.81  | 0.74  | 0.80  |
| 108277939 | LOC108277939 | -1.02 | -0.01 | -0.27 | -0.04 | 0.09  |
| 108278384 | spcs2        | 1.40  | 0.60  | 0.28  | 0.73  | 0.79  |
| 108277440 | LOC108277440 | 1.32  | -0.06 | -0.56 | 0.52  | 0.43  |
| 108277430 | trim50       | -0.81 | -1.37 | -0.22 | -0.79 | -0.46 |
| 108277812 | LOC108277812 | 1.14  | 0.85  | 0.76  | 0.84  | 0.56  |
| 108278188 | LOC108278188 | -1.73 | -0.61 | 0.04  | -0.32 | -0.67 |
| 108277459 | tm4sf19      | -1.30 | -0.13 | -0.53 | -0.57 | 0.79  |
| 108277515 | LOC108277515 | -1.08 | -1.04 | -0.50 | 1.62  | 2.27  |
| 108278364 | gpr171       | -0.42 | 0.40  | 0.33  | 0.87  | 1.44  |
| 108277975 | LOC108277975 | 0.09  | 0.24  | 0.15  | 0.03  | 1.30  |
| 100528555 | nduc2        | 1.23  | 0.75  | 0.59  | 0.65  | 0.53  |
| 108278289 | lhfp         | 1.03  | 0.27  | 0.02  | 0.29  | -0.05 |
| 108277888 | gbe1         | 1.05  | 0.72  | 0.50  | 0.76  | 0.47  |
| 108277678 | LOC108277678 | 1.12  | 0.98  | 0.76  | 0.50  | 0.49  |
| 108278010 | slc37a4      | 1.00  | 0.43  | 0.35  | 0.07  | -0.28 |
| 108277872 | arhgap35     | 0.90  | 0.72  | 1.19  | 0.87  | 0.38  |
| 108278258 | sostdc1      | 1.54  | 0.37  | -0.23 | 0.42  | 0.22  |
| 108277428 | meox2        | 1.19  | 0.87  | 0.51  | 0.63  | 0.01  |
| 108261250 | LOC108261250 | 0.07  | -0.55 | -0.17 | -0.27 | -1.16 |
| 108277883 | LOC108277883 | 2.02  | 0.88  | -0.10 | 0.26  | 0.36  |
| 108277732 | LOC108277732 | -1.09 | -0.64 | 0.32  | 0.92  | 1.17  |
| 108277448 | LOC108277448 | -0.36 | -0.40 | 0.09  | 0.88  | 1.18  |
| 108277764 | rnf2         | 1.04  | 0.68  | 0.54  | 0.90  | 0.70  |
| 108277763 | LOC108277763 | -1.19 | -0.14 | -0.90 | -0.69 | -0.31 |
| 108278298 | irs1         | 2.25  | 1.67  | 1.17  | 1.83  | 1.56  |
| 108277757 | LOC108277757 | -1.49 | -0.48 | -0.99 | -0.77 | 0.06  |
| 108277755 | pdgfd        | 1.88  | 0.98  | 0.08  | 0.46  | 0.62  |
| 108278230 | numa1        | 1.07  | 0.48  | -0.24 | -0.01 | 0.14  |

|           |              |       |       |       |       |       |
|-----------|--------------|-------|-------|-------|-------|-------|
| 108277594 | sgpp2        | 0.95  | 1.09  | 1.42  | 0.47  | 1.00  |
| 108278339 | LOC108278339 | 1.26  | 0.90  | 0.50  | 0.37  | 0.50  |
| 108256081 | LOC108256081 | 1.70  | 0.77  | -0.08 | 0.48  | 0.49  |
| 108277964 | rpa1         | 1.14  | 0.58  | 0.46  | 0.53  | 0.51  |
| 108278383 | LOC108278383 | -0.18 | 0.18  | 0.25  | 0.46  | 1.03  |
| 108277782 | LOC108277782 | -1.01 | -0.72 | -0.50 | -0.77 | -0.53 |
| 108278387 | LOC108278387 | 0.14  | -0.16 | -1.24 | 0.10  | 0.61  |
| 100528553 | atp5h        | 1.24  | 0.69  | 0.30  | 0.41  | 0.35  |
| 108277485 | exoc3l2      | 0.09  | 0.75  | 0.28  | 1.47  | 0.55  |
| 108277486 | dll3         | 0.69  | 0.76  | 0.80  | 1.44  | 0.90  |
| 108277451 | tmem136      | 1.22  | 0.48  | -0.56 | -0.03 | -0.18 |
| 108278372 | LOC108278372 | -0.46 | -0.02 | 0.61  | 1.48  | 0.86  |
| 108278327 | scn3b        | 0.08  | -0.21 | -1.04 | -0.35 | -0.26 |
| 108277700 | LOC108277700 | 1.56  | 0.92  | 0.17  | 0.31  | 0.57  |
| 108277784 | il4i1        | -1.59 | -0.90 | -0.34 | -0.19 | -0.95 |
| 108277936 | LOC108277936 | 1.28  | 0.28  | 0.33  | 0.54  | 0.23  |
| 108278292 | LOC108278292 | 0.87  | 0.58  | 0.59  | 0.71  | 1.15  |
| 108278329 | hmgxb4       | -1.12 | -0.78 | -0.62 | -0.79 | -0.84 |
| 108277838 | relb         | -1.12 | -0.41 | -0.55 | -0.52 | -0.16 |
| 108277441 | mos          | -0.59 | -0.64 | -1.24 | -0.84 | -0.39 |
| 108260797 | LOC108260797 | 1.17  | 0.69  | 0.77  | 0.89  | 0.85  |
| 108277913 | mrm3         | -0.39 | -0.68 | -1.28 | -0.52 | -0.46 |
| 108277449 | LOC108277449 | 1.76  | 0.86  | -0.14 | 0.17  | 0.07  |
| 100528836 | tob1         | 0.77  | 1.05  | 0.51  | 0.28  | 0.38  |
| 108277970 | LOC108277970 | 1.17  | 0.40  | 0.05  | 0.43  | 0.41  |
| 108278350 | LOC108278350 | 1.20  | 0.36  | 0.77  | 0.71  | 0.29  |
| 108278242 | LOC108278242 | -0.46 | 0.13  | 0.48  | 0.50  | 1.17  |
| 108278389 | serpine2     | 1.29  | 0.32  | -0.27 | -0.04 | -0.15 |
| 100529051 | erd22        | 1.51  | 0.79  | 0.39  | 0.96  | 0.74  |
| 108278338 | LOC108278338 | -0.77 | -1.08 | -0.63 | -0.38 | -0.90 |
| 108277796 | scn2b        | 0.99  | 1.10  | 0.44  | 0.43  | 0.67  |
| 108278207 | LOC108278207 | 0.26  | 1.13  | 0.37  | 0.71  | 0.73  |
| 108278287 | LOC108278287 | 0.91  | 1.13  | 0.70  | 0.86  | 0.75  |
| 108278393 | LOC108278393 | -1.31 | -0.20 | 0.05  | -0.46 | 0.07  |
| 100528969 | ndufb10      | 1.25  | 0.72  | 0.40  | 0.62  | 0.49  |
| 108278367 | mpzl2        | 1.01  | 0.88  | 0.23  | 0.33  | 0.36  |
| 108254972 | hs3st6       | -0.01 | -0.06 | 0.50  | 0.90  | 1.09  |
| 100528639 | skp1         | 1.09  | 0.60  | 0.30  | 0.45  | 0.31  |
| 108279232 | c18h5orf15   | 1.25  | 0.86  | 0.41  | 0.99  | 0.91  |
| 108278859 | LOC108278859 | -1.72 | -0.58 | 0.17  | 0.05  | -0.20 |
| 108278755 | col5a1       | 0.16  | 0.10  | 0.38  | 0.36  | 1.17  |
| 108278914 | LOC108278914 | -1.03 | -0.72 | -0.47 | -0.76 | -0.46 |
| 100528798 | tbca         | 1.17  | 0.76  | 0.53  | 0.57  | 0.66  |
| 100528351 | psmb7        | 1.20  | 0.64  | 0.06  | -0.18 | -0.05 |
| 108278821 | atp5a1       | 1.01  | 0.53  | 0.04  | 0.24  | 0.18  |

|           |              |       |       |       |       |       |
|-----------|--------------|-------|-------|-------|-------|-------|
| 108279149 | LOC108279149 | -1.49 | -0.69 | -0.54 | 0.08  | -0.71 |
| 108279162 | st6galnac4   | 1.60  | 1.15  | 1.48  | 1.82  | 1.39  |
| 108279170 | dolk         | 1.27  | 0.91  | 0.79  | 0.70  | 0.64  |
| 108278692 | LOC108278692 | -2.52 | -0.70 | 0.58  | 0.08  | -0.21 |
| 108278734 | mlana        | 1.13  | 0.57  | -0.11 | 0.18  | -0.34 |
| 108260916 | gaa          | -1.19 | -0.07 | 0.19  | -0.12 | 0.64  |
| 108279326 | LOC108279326 | 0.23  | 0.55  | 0.99  | 1.66  | 0.66  |
| 108278988 | slc31a2      | -1.41 | -0.93 | -0.84 | -0.97 | -0.64 |
| 108279112 | LOC108279112 | 0.13  | 0.98  | 1.07  | 0.24  | 0.60  |
| 108279283 | LOC108279283 | -0.43 | 0.02  | 0.08  | 0.62  | 1.25  |
| 108278943 | sfswap       | -1.15 | -0.28 | 0.14  | 0.08  | 0.10  |
| 100528812 | aqp7         | -0.90 | -0.67 | -0.51 | -1.01 | -0.48 |
| 108278653 | LOC108278653 | -0.73 | -1.14 | -0.21 | 0.27  | -0.91 |
| 108278654 | LOC108278654 | -0.58 | -0.56 | -0.44 | -0.67 | -1.10 |
| 100415908 | LOC100415908 | -0.43 | -0.42 | -0.34 | 1.28  | 0.97  |
| 108278897 | LOC108278897 | 1.10  | 0.57  | 0.33  | 0.64  | 0.96  |
| 108279311 | gfi1b        | 0.32  | 0.72  | 0.79  | 0.83  | 1.54  |
| 108279027 | dmgdh        | 0.27  | 0.82  | 1.08  | 0.43  | 0.93  |
| 108279065 | homer1       | 0.77  | 0.84  | 0.52  | 1.18  | 0.95  |
| 108278455 | LOC108278455 | 1.53  | 0.90  | 0.60  | 0.52  | -0.20 |
| 108258300 | gadd45gip1   | 1.04  | 0.63  | -0.08 | 0.44  | 0.12  |
| 108278783 | LOC108278783 | 0.38  | 1.07  | 0.66  | -0.78 | -0.21 |
| 108278483 | stard4       | 2.16  | 0.75  | 0.65  | 0.94  | 0.75  |
| 108278894 | LOC108278894 | -1.13 | -0.68 | -0.42 | -0.70 | -0.83 |
| 108279105 | LOC108279105 | 1.41  | 0.96  | 0.62  | 0.77  | 0.66  |
| 108279266 | LOC108279266 | 0.23  | 0.07  | 0.38  | 0.54  | 1.39  |
| 108278470 | LOC108278470 | -1.39 | -0.37 | -0.06 | -0.23 | 0.51  |
| 108278833 | LOC108278833 | -0.75 | -1.27 | -0.89 | -0.98 | -0.73 |
| 108278656 | tmem205      | 1.06  | 0.63  | 0.19  | 0.46  | 0.45  |
| 108278618 | LOC108278618 | 0.96  | 0.77  | 0.80  | 1.17  | 0.87  |
| 108278612 | LOC108278612 | 0.84  | 0.92  | 0.33  | 0.82  | 1.07  |
| 108279256 | LOC108279256 | -1.01 | -0.67 | -0.41 | -0.62 | -0.47 |
| 108279329 | LOC108279329 | 1.12  | 0.57  | 0.32  | 0.49  | 0.60  |
| 108279273 | LOC108279273 | 0.51  | 0.44  | -0.04 | 0.53  | 1.09  |
| 108278435 | LOC108278435 | 0.45  | 0.33  | -0.40 | 0.54  | 1.48  |
| 108278769 | LOC108278769 | -1.09 | -0.81 | -0.76 | -0.80 | -0.72 |
| 108279230 | gng3         | -0.22 | -0.18 | 0.46  | 0.90  | 2.30  |
| 108279128 | LOC108279128 | 1.01  | 0.46  | -0.03 | 0.24  | 0.26  |
| 108278747 | bad          | 0.52  | 0.67  | 0.27  | 0.65  | 1.10  |
| 108278533 | LOC108278533 | -0.70 | -0.62 | -1.09 | -0.66 | -0.61 |
| 108279075 | LOC108279075 | 1.23  | 0.76  | 0.73  | 0.90  | 0.70  |
| 108278871 | LOC108278871 | 0.76  | 0.91  | 0.85  | 1.08  | 0.82  |
| 108278570 | LOC108278570 | 1.27  | 0.63  | 0.42  | 0.29  | 0.52  |
| 108256459 | LOC108256459 | 1.02  | 0.88  | 0.50  | 0.92  | 0.73  |
| 108279330 | cxxc5        | 1.12  | 0.38  | 0.16  | -0.21 | 0.09  |



|           |              |       |       |       |       |       |
|-----------|--------------|-------|-------|-------|-------|-------|
| 100304768 | pfdn1        | 1.06  | 0.75  | 0.42  | 0.62  | 0.64  |
| 108278477 | LOC108278477 | -1.09 | -0.61 | -0.57 | -0.32 | -0.66 |
| 108278944 | LOC108278944 | 1.03  | 0.73  | 0.49  | 0.58  | 0.73  |
| 108257984 | LOC108257984 | 2.22  | 1.69  | 1.18  | 1.29  | 0.06  |
| 100528111 | pgap2        | 1.05  | 0.57  | 0.07  | 0.84  | 0.26  |
| 108279314 | LOC108279314 | -0.58 | -0.35 | -0.30 | 1.56  | 2.41  |
| 108278727 | sdf2         | 1.47  | 0.83  | -0.27 | 0.67  | 0.48  |
| 108279067 | wbscr27      | 0.52  | 0.87  | 0.78  | 1.03  | 1.49  |
| 108279215 | LOC108279215 | 0.61  | 0.41  | 0.58  | 1.20  | 0.38  |
| 108278456 | LOC108278456 | 0.65  | 0.36  | 0.80  | 0.94  | 1.07  |
| 108278953 | LOC108278953 | 0.78  | 1.06  | 0.75  | 0.96  | 0.81  |
| 108278463 | rfc2         | 1.32  | 0.40  | 0.23  | 0.26  | 0.28  |
| 108279240 | LOC108279240 | 1.91  | 0.98  | 0.22  | 0.54  | 0.69  |
| 100528430 | anapc13      | 1.11  | 0.70  | 0.34  | 0.44  | 0.45  |
| 108256494 | LOC108256494 | -1.04 | -0.68 | -0.49 | -0.68 | -0.35 |
| 108278739 | LOC108278739 | -1.72 | -0.88 | -0.58 | -0.84 | -0.95 |
| 108279298 | LOC108279298 | -0.77 | -0.81 | -0.31 | -0.46 | -1.52 |
| 108278491 | chek1        | -0.26 | -0.42 | -0.66 | -1.05 | -0.97 |
| 108279374 | cfap53       | -1.45 | -0.91 | -0.81 | -0.58 | -0.30 |
| 108260485 | LOC108260485 | -1.29 | -0.75 | -0.57 | -0.56 | -0.46 |
| 108279357 | LOC108279357 | 0.51  | 0.94  | 1.44  | 2.69  | 4.35  |
| 108278789 | rimbp3b      | -0.78 | -0.45 | -0.29 | 0.25  | 1.31  |
| 108278791 | med15        | -1.13 | -0.67 | -0.52 | -0.63 | -0.71 |
| 108270539 | c1h16orf91   | 1.08  | 0.77  | -0.18 | 0.53  | 0.00  |
| 108279300 | amacr        | 1.09  | 0.65  | 0.14  | 0.22  | 0.15  |
| 100304605 | gzmk         | -0.09 | -0.24 | 0.31  | 1.25  | 0.50  |
| 108278849 | fyb          | -1.12 | -0.83 | -0.37 | -0.42 | -0.28 |
| 108279297 | dusp4        | -0.56 | -0.71 | -1.03 | -0.19 | 0.60  |
| 100304685 | ghr          | -0.55 | -0.60 | -0.28 | -0.51 | -1.31 |
| 108278465 | LOC108278465 | 1.35  | 0.07  | 0.95  | 0.46  | 0.26  |
| 108278966 | LOC108278966 | -1.00 | -0.63 | -0.64 | 0.01  | -0.09 |
| 100528196 | pgrmc1       | 1.01  | 0.53  | 0.02  | 0.44  | 0.41  |
| 108278926 | LOC108278926 | 0.05  | -0.79 | -0.40 | -0.97 | -1.38 |
| 108278555 | LOC108278555 | -1.25 | -0.27 | -0.61 | -0.45 | -0.72 |
| 108278758 | LOC108278758 | 1.60  | 0.68  | -0.04 | -0.02 | -0.06 |
| 108278878 | serpinf1     | 1.43  | 0.10  | -0.27 | 0.34  | 0.54  |
| 108278940 | cct6a        | 1.09  | 0.54  | 0.19  | 0.46  | 0.34  |
| 108278762 | dkc1         | -0.75 | -1.05 | -0.77 | -0.95 | -0.92 |
| 108278674 | LOC108278674 | 1.37  | 1.00  | 1.08  | 1.14  | 0.99  |
| 108278677 | atg4a        | -1.02 | -0.22 | 0.13  | -0.19 | -0.21 |
| 108278680 | LOC108278680 | 1.11  | 0.78  | 0.60  | 0.69  | 0.59  |
| 108279528 | LOC108279528 | -1.99 | -0.45 | -0.24 | -0.13 | -0.68 |
| 108279582 | LOC108279582 | -1.41 | -0.92 | -0.11 | 0.15  | 0.07  |
| 108279699 | LOC108279699 | 1.51  | 1.09  | -0.15 | 0.49  | -0.48 |
| 108279702 | usp18        | -0.92 | -0.98 | -0.58 | -0.91 | -1.75 |

|           |              |       |       |       |       |       |
|-----------|--------------|-------|-------|-------|-------|-------|
| 108279670 | reng         | 1.99  | 0.80  | -0.29 | 1.00  | 0.58  |
| 108279796 | apex1        | 1.03  | 0.67  | 0.27  | 0.51  | 0.54  |
| 108279993 | LOC108279993 | -1.17 | -0.81 | -0.78 | -0.72 | -0.70 |
| 108279994 | LOC108279994 | -0.02 | 0.15  | 0.29  | 0.34  | 1.21  |
| 108279725 | ndufa12      | 1.20  | 0.68  | 0.64  | 0.50  | 0.44  |
| 108260878 | amn          | -1.38 | -0.66 | -0.73 | -0.79 | -0.74 |
| 108279853 | LOC108279853 | 1.05  | 0.67  | 0.32  | 0.30  | 0.56  |
| 108279985 | LOC108279985 | -1.01 | -0.08 | -0.37 | -0.79 | -0.13 |
| 108279848 | LOC108279848 | -0.97 | -0.72 | -1.16 | -0.56 | -0.50 |
| 108279850 | LOC108279850 | -1.00 | -0.95 | -0.33 | -0.67 | -0.96 |
| 108280147 | LOC108280147 | -1.01 | -0.49 | -0.42 | -0.44 | 0.11  |
| 108279854 | sfmbt2       | -1.12 | -0.92 | -0.71 | -0.66 | -0.64 |
| 108279772 | itih5        | 1.63  | 0.81  | 0.22  | 0.21  | 0.17  |
| 108279430 | LOC108279430 | -0.74 | -0.03 | -0.57 | -1.30 | -0.94 |
| 108279465 | LOC108279465 | 1.27  | 0.67  | 0.11  | 0.40  | 1.05  |
| 108258750 | lgals3bp     | -0.10 | -0.31 | -0.18 | -0.14 | -1.02 |
| 108280088 | LOC108280088 | 0.85  | 0.35  | -0.16 | -0.03 | 1.03  |
| 108280101 | LOC108280101 | -0.55 | -0.98 | -0.88 | -1.08 | -0.48 |
| 108280103 | LOC108280103 | -2.32 | -0.26 | -0.31 | -0.44 | -0.19 |
| 108280111 | LOC108280111 | 1.52  | 1.68  | 2.70  | 1.21  | 1.57  |
| 108280097 | LOC108280097 | -1.21 | -0.64 | -0.48 | -0.75 | -0.87 |
| 108280066 | LOC108280066 | 0.36  | 0.64  | 1.10  | 0.05  | 0.69  |
| 108280060 | ptprb        | 2.56  | 1.56  | 0.89  | 0.83  | 1.33  |
| 108280086 | LOC108280086 | 1.16  | 0.15  | -0.16 | -0.20 | 0.19  |
| 108274059 | LOC108274059 | 1.37  | 0.91  | -0.57 | 0.36  | 0.32  |
| 108260380 | LOC108260380 | -0.81 | -1.21 | -0.76 | -0.51 | 0.20  |
| 108279695 | celf2        | -1.02 | -0.76 | -0.52 | -0.59 | -0.45 |
| 108279915 | LOC108279915 | -0.42 | -0.60 | -0.69 | -1.13 | -0.65 |
| 108258059 | LOC108258059 | 1.00  | 0.51  | 0.18  | 0.40  | 0.37  |
| 108279803 | LOC108279803 | -1.08 | -0.59 | -0.23 | -0.67 | -0.75 |
| 108259727 | LOC108259727 | -0.15 | -0.01 | 0.30  | 0.40  | 1.04  |
| 108280009 | LOC108280009 | 1.00  | 0.35  | 0.11  | 0.12  | 0.27  |
| 100528768 | lyrm5        | 1.58  | 0.80  | 0.61  | 0.73  | 0.58  |
| 108279688 | LOC108279688 | -0.65 | -0.51 | -0.62 | -1.01 | -0.49 |
| 108279690 | cald1        | 1.16  | 0.45  | 0.41  | 0.29  | 0.52  |
| 108279959 | LOC108279959 | 1.50  | 1.07  | -0.06 | 0.18  | 0.46  |
| 108279897 | cbll1        | -1.08 | -0.71 | -0.33 | -0.48 | -0.64 |
| 100528258 | tmbim4       | 1.09  | 0.65  | 0.54  | 0.96  | 0.47  |
| 108279757 | irak3        | -1.09 | -0.77 | -0.53 | -0.44 | -0.60 |
| 108279735 | LOC108279735 | 1.35  | 0.97  | 0.37  | 0.43  | 0.36  |
| 108279944 | LOC108279944 | 1.55  | 0.49  | -0.24 | 0.03  | -0.03 |
| 108279743 | LOC108279743 | -1.37 | 0.35  | -0.38 | -0.78 | -0.16 |
| 108279744 | mkln1        | 1.05  | 0.93  | 0.73  | 0.67  | 0.79  |
| 108280041 | adm2         | 0.93  | 0.30  | -0.53 | -1.26 | -0.38 |
| 100528455 | tsn9         | 1.44  | 0.63  | 0.34  | 0.52  | 0.67  |

|           |              |       |       |       |       |       |
|-----------|--------------|-------|-------|-------|-------|-------|
| 108277067 | rnf213       | -1.03 | -0.75 | -0.29 | -0.67 | -0.93 |
| 108280138 | c19h12orf45  | 1.03  | 0.52  | 0.65  | 0.79  | 0.67  |
| 108280033 | LOC108280033 | -0.75 | -0.44 | -0.33 | -0.83 | -1.07 |
| 108279880 | atp2b1       | -1.06 | -0.79 | -0.55 | -0.64 | -0.31 |
| 108279747 | dcn          | 1.31  | 0.52  | 0.12  | 0.24  | 0.60  |
| 108279449 | parpbp       | -0.20 | -0.27 | -0.66 | -0.81 | -1.00 |
| 108279838 | sox5         | -1.11 | -0.75 | -0.82 | -0.43 | -0.40 |
| 108279645 | LOC108279645 | -1.03 | -0.08 | 0.40  | 0.21  | 0.23  |
| 108279644 | orc5         | 1.02  | 0.23  | -0.21 | -0.15 | 0.28  |
| 108279831 | sema3c       | 1.74  | 1.25  | 1.09  | 1.48  | 2.09  |
| 108279488 | nap1l1       | 1.30  | 0.71  | 0.39  | 0.53  | 0.66  |
| 108279491 | LOC108279491 | -1.15 | -0.36 | -0.46 | -0.21 | -0.61 |
| 108280372 | LOC108280372 | -0.83 | -1.24 | -0.35 | 0.15  | 0.31  |
| 108280373 | LOC108280373 | -0.15 | -0.61 | 1.64  | 2.75  | 4.59  |
| 108280378 | LOC108280378 | -0.65 | 0.19  | -0.82 | 0.68  | 1.70  |
| 108280641 | LOC108280641 | -1.20 | -0.87 | -0.76 | -0.52 | -0.10 |
| 108280642 | LOC108280642 | -1.96 | -0.94 | -0.84 | -0.99 | -0.52 |
| 108280443 | LOC108280443 | -1.14 | -0.58 | -0.23 | -0.33 | -0.26 |
| 108280844 | LOC108280844 | -1.02 | -0.27 | 0.02  | -0.21 | -0.40 |
| 108280572 | prdm1        | -1.23 | -0.23 | -0.75 | -0.80 | -0.23 |
| 108280198 | LOC108280198 | 0.44  | 2.04  | 3.40  | 2.00  | -0.20 |
| 108280485 | cux1         | -1.14 | -0.61 | -0.43 | -0.41 | -0.55 |
| 108280668 | mbp          | 1.54  | 0.94  | 0.13  | 0.45  | 0.41  |
| 108280775 | LOC108280775 | 1.01  | 0.33  | -0.06 | 0.17  | 0.32  |
| 108280197 | shox2        | -0.26 | -0.39 | -0.21 | -0.44 | -1.14 |
| 108280871 | sbds         | 1.47  | 0.96  | 0.56  | 0.86  | 0.70  |
| 108280653 | LOC108280653 | 1.23  | 0.26  | 0.01  | -0.08 | 0.46  |
| 108276380 | LOC108276380 | -0.60 | -0.50 | 0.00  | -0.70 | -1.32 |
| 108280907 | mrpl34       | 1.01  | 0.63  | 0.43  | 0.44  | 0.30  |
| 108280869 | LOC108280869 | 1.03  | 0.80  | 0.13  | 0.80  | 0.09  |
| 108276419 | LOC108276419 | -0.38 | -0.40 | -0.22 | -0.75 | -1.10 |
| 108280466 | LOC108280466 | -2.09 | -1.91 | -1.34 | -1.56 | -1.75 |
| 108280460 | LOC108280460 | -1.03 | -0.60 | 0.11  | 0.55  | 0.27  |
| 108280605 | gpr55        | 0.49  | 0.62  | 0.98  | 1.05  | 0.90  |
| 108280286 | LOC108280286 | -1.26 | -0.75 | -0.23 | -0.18 | -0.37 |
| 108280219 | LOC108280219 | -1.31 | -0.75 | -0.55 | -0.78 | -0.51 |
| 100528474 | sh3gl        | 1.33  | 0.96  | 0.17  | 0.59  | 0.33  |
| 108280521 | piwil1       | -0.07 | 0.67  | 1.05  | -0.11 | -0.13 |
| 108280735 | LOC108280735 | 0.06  | -0.54 | -1.07 | -0.77 | -0.51 |
| 108280169 | LOC108280169 | 1.37  | 0.83  | 0.70  | 0.61  | 0.86  |
| 108280863 | twsgl        | 1.55  | 0.40  | 0.11  | 0.28  | 0.37  |
| 108280716 | plpp2        | 1.04  | 0.90  | 0.84  | 0.96  | 0.65  |
| 108258651 | LOC108258651 | -0.11 | -2.81 | 0.67  | 1.62  | 2.06  |
| 108280926 | LOC108280926 | 1.32  | 0.78  | 0.63  | 0.92  | 0.46  |
| 100528594 | plekhj1      | 1.33  | 0.96  | 0.89  | 0.86  | 0.55  |

|           |              |       |       |       |       |       |
|-----------|--------------|-------|-------|-------|-------|-------|
| 100528123 | mp2k2        | 1.10  | 0.55  | 0.13  | 0.63  | 0.27  |
| 108280490 | LOC108280490 | 1.10  | 0.78  | 0.37  | 0.23  | 0.37  |
| 108255824 | LOC108255824 | -0.18 | -0.10 | 0.54  | 1.04  | 0.73  |
| 108280537 | LOC108280537 | 0.97  | 0.98  | 1.08  | 0.64  | 0.50  |
| 108280569 | LOC108280569 | -0.38 | -0.29 | -0.09 | 0.65  | 1.41  |
| 108280879 | LOC108280879 | -1.16 | 0.66  | -0.64 | -0.22 | 0.32  |
| 108280837 | LOC108280837 | -0.93 | -0.68 | -0.53 | -0.60 | -1.64 |
| 108280684 | LOC108280684 | 1.12  | 0.72  | 0.42  | 0.16  | 0.11  |
| 108280739 | LOC108280739 | -0.19 | -0.57 | -0.12 | 1.10  | 0.84  |
| 108280866 | phb2         | 1.12  | 0.59  | 0.12  | 0.20  | 0.26  |
| 108280705 | mb21d2       | -0.70 | -1.44 | -0.54 | -0.95 | -0.69 |
| 108276866 | LOC108276866 | -1.91 | -1.08 | -0.53 | -1.05 | -1.73 |
| 108280475 | ssbp3        | 0.47  | 0.11  | 0.21  | 0.03  | 1.09  |
| 108280759 | LOC108280759 | -1.18 | -0.65 | -0.30 | -0.06 | 0.72  |
| 108280483 | LOC108280483 | -0.65 | -0.48 | 0.14  | 1.34  | 0.80  |
| 108280806 | LOC108280806 | -1.19 | 0.07  | -0.72 | -0.92 | -0.34 |
| 108280831 | pif1         | -0.11 | -0.42 | -0.76 | -1.02 | -0.71 |
| 108280762 | LOC108280762 | -0.80 | -0.52 | -0.91 | -1.00 | -0.09 |
| 108276886 | atf7ip2      | -1.16 | -0.53 | -0.32 | -0.65 | -0.38 |
| 108280415 | LOC108280415 | -1.19 | -0.63 | -0.30 | -0.63 | -0.45 |
| 108280821 | LOC108280821 | 1.75  | 0.80  | 0.54  | -0.48 | -0.41 |
| 108255010 | LOC108255010 | -0.14 | 1.19  | 0.21  | 0.75  | 0.47  |
| 108255011 | LOC108255011 | 1.07  | 0.27  | -0.15 | 0.08  | 0.76  |
| 108254925 | LOC108254925 | -0.84 | -0.89 | -0.94 | -1.41 | -0.83 |
| 108281076 | LOC108281076 | -0.94 | -0.64 | -0.38 | -1.14 | -0.78 |
| 108281078 | LOC108281078 | 1.02  | 0.79  | 0.46  | 0.61  | 0.83  |
| 108281093 | nbl1         | 1.27  | 0.74  | 0.67  | 0.99  | 0.68  |
| 108254875 | fblim1       | -0.28 | -0.25 | -0.68 | -1.07 | -0.71 |
| 108254715 | LOC108254715 | -0.94 | -0.41 | -0.31 | -1.02 | -0.60 |
| 108254762 | LOC108254762 | -1.25 | -0.87 | -0.42 | -0.27 | -0.12 |
| 108254764 | LOC108254764 | -1.01 | -0.61 | -0.16 | 0.05  | 0.23  |
| 108254720 | LOC108254720 | -1.60 | -0.71 | -0.30 | 0.04  | 0.02  |
| 108270505 | LOC108270505 | -0.21 | -0.46 | 1.08  | 1.93  | 2.09  |
| 108280975 | LOC108280975 | 0.37  | -0.32 | -0.39 | -0.33 | -1.02 |
| 108255142 | bhlhe40      | -1.84 | -0.54 | -0.62 | -0.38 | -0.05 |
| 108280984 | LOC108280984 | -0.84 | -1.24 | -0.60 | -1.01 | -0.93 |
| 100528592 | spcs1        | 1.17  | 0.35  | 0.29  | 0.29  | 0.50  |
| 108254901 | LOC108254901 | 1.53  | 0.41  | -0.81 | -0.18 | 0.74  |
| 108255098 | fhit         | 1.09  | 0.56  | 0.39  | 0.15  | 0.45  |
| 108254984 | LOC108254984 | 1.24  | 0.69  | 0.01  | 0.87  | 0.39  |
| 108278600 | igfbp7       | 1.39  | 0.98  | 0.47  | 0.44  | 0.79  |
| 108280998 | LOC108280998 | 0.14  | -0.03 | 1.06  | 0.75  | 0.50  |
| 108254847 | LOC108254847 | -0.65 | -1.05 | -0.71 | -0.37 | -0.68 |
| 108277145 | LOC108277145 | 1.08  | 0.59  | 0.19  | 0.36  | 0.54  |
| 108255230 | LOC108255230 | 0.31  | 0.11  | 0.72  | 1.21  | -0.02 |

|           |              |       |       |       |       |       |
|-----------|--------------|-------|-------|-------|-------|-------|
| 108255115 | il10         | -1.91 | -0.54 | -0.87 | -0.54 | -0.28 |
| 108254834 | LOC108254834 | 1.24  | 0.91  | 0.67  | 0.96  | 0.69  |
| 108254787 | LOC108254787 | 1.09  | 0.91  | 0.67  | 0.36  | 0.40  |
| 108254788 | elmo2        | 0.27  | 0.53  | 0.39  | 0.39  | 1.47  |
| 108254795 | mettl21b     | -0.69 | -0.76 | -0.70 | -1.22 | -0.91 |
| 108255209 | LOC108255209 | 1.13  | 0.37  | 0.35  | 0.40  | 0.68  |
| 108254864 | poc1a        | -1.24 | -0.72 | -0.72 | -0.97 | -0.82 |
| 108255167 | LOC108255167 | -1.23 | -0.73 | -0.14 | -0.49 | -0.69 |
| 108255071 | LOC108255071 | -0.39 | 0.84  | -0.14 | 0.02  | 1.72  |
| 108255101 | LOC108255101 | -0.91 | -0.32 | -1.07 | -0.67 | 0.84  |
| 100528978 | cdc42        | 1.00  | 0.36  | 0.16  | 0.39  | 0.34  |
| 108254811 | camta1       | -0.74 | -0.58 | -0.49 | -0.70 | -1.13 |
| 108254867 | LOC108254867 | 1.57  | -0.02 | -0.23 | 0.24  | 0.42  |
| 108254992 | cldn19       | 1.22  | 0.39  | -0.24 | 0.02  | 0.13  |
| 108255092 | LOC108255092 | -1.56 | -0.45 | -0.23 | 0.17  | 0.73  |
| 108254836 | LOC108254836 | 1.26  | 0.85  | 0.81  | 1.72  | 1.22  |
| 108255138 | LOC108255138 | -1.08 | -0.76 | -0.14 | 0.28  | -0.09 |
| 108258503 | LOC108258503 | -1.30 | -0.91 | -0.23 | -0.13 | -0.03 |
| 108254998 | LOC108254998 | -1.10 | -0.84 | -0.27 | -1.31 | -0.99 |
| 108280979 | LOC108280979 | -0.04 | -0.30 | -0.75 | -1.47 | -0.89 |
| 108254890 | slmap        | 0.92  | 1.06  | 0.69  | 0.90  | 0.64  |
| 100528789 | arf4         | -0.93 | -1.27 | -0.86 | -0.97 | -0.88 |
| 108254969 | LOC108254969 | 1.02  | 0.53  | 0.14  | 0.43  | 0.73  |
| 108277590 | LOC108277590 | -1.14 | -0.58 | -0.54 | 0.35  | 0.48  |
| 108255047 | ccdc66       | -1.33 | -0.81 | -0.69 | -0.94 | -0.72 |
| 108254902 | lmcd1        | 0.67  | 1.26  | 0.66  | 0.31  | 0.68  |
| 108254904 | rnf123       | 1.05  | 0.89  | 0.71  | 0.76  | 0.54  |
| 108254859 | slc6a6       | 1.38  | 0.92  | 0.76  | 0.60  | 0.54  |
| 108255242 | mcm2         | 1.02  | -0.03 | -0.24 | 0.03  | -0.16 |
| 100528814 | pdhb         | 1.05  | 0.61  | 0.01  | 0.05  | 0.04  |
| 108254960 | stab1        | -0.46 | -0.38 | -0.85 | -0.91 | -1.09 |
| 108255163 | nuf2         | 1.04  | 0.59  | -0.13 | 0.29  | 0.16  |
| 108254961 | LOC108254961 | -1.30 | -0.99 | -0.36 | -0.38 | -0.25 |
| 108255063 | LOC108255063 | 1.13  | 0.76  | 0.17  | 0.51  | 0.92  |
| 108255223 | c21h12orf10  | 1.26  | 0.52  | 0.46  | 0.23  | 0.26  |
| 100528404 | rabif        | 1.04  | 0.75  | 0.37  | 0.43  | 0.43  |
| 108280982 | LOC108280982 | -0.73 | -0.86 | -0.68 | -1.28 | -0.27 |
| 108255385 | LOC108255385 | -0.24 | -0.70 | -1.46 | -0.77 | 0.09  |
| 108255475 | LOC108255475 | 1.05  | 0.88  | 0.02  | 0.63  | 0.77  |
| 108255478 | LOC108255478 | 1.07  | 0.00  | -0.09 | -0.23 | 0.20  |
| 108255480 | ascc2        | -1.09 | -0.96 | -0.68 | -0.83 | -0.83 |
| 108255958 | LOC108255958 | -1.20 | -0.44 | -0.30 | -0.61 | -0.68 |
| 108255959 | galnt9       | 2.73  | 1.94  | 0.45  | 1.92  | 1.54  |
| 108255471 | emid1        | 0.99  | 0.90  | 0.27  | 0.60  | 1.27  |
| 108255995 | snrnp27      | 1.01  | 0.69  | 0.25  | 0.53  | 0.71  |

|           |              |       |       |       |       |       |
|-----------|--------------|-------|-------|-------|-------|-------|
| 108277608 | LOC108277608 | 0.73  | 0.25  | 0.43  | 0.76  | 1.06  |
| 108255940 | hspb8        | 1.31  | 0.03  | -0.37 | 0.25  | 0.36  |
| 108255972 | LOC108255972 | 0.65  | 0.92  | 1.24  | 0.60  | 0.43  |
| 108255982 | imp4         | 1.11  | 0.36  | 0.15  | 0.40  | 0.39  |
| 100528104 | nips1        | -1.05 | -0.49 | -0.29 | -0.77 | -1.00 |
| 108255720 | lztr1        | 1.00  | 0.98  | 0.78  | 0.96  | 0.56  |
| 108255721 | pole         | -0.35 | -0.63 | -1.03 | -0.82 | -0.72 |
| 108255942 | purb         | 1.31  | 0.79  | 0.25  | 0.72  | 0.68  |
| 108255366 | LOC108255366 | -0.45 | 0.36  | 0.68  | 1.40  | 0.94  |
| 108255981 | LOC108255981 | -1.14 | 0.05  | -0.48 | -0.39 | -0.09 |
| 108255772 | npdc1        | -0.49 | 0.20  | 0.59  | 0.68  | 1.73  |
| 108255826 | trafd1       | -0.88 | -0.86 | -0.52 | -0.86 | -1.24 |
| 108271017 | LOC108271017 | -1.78 | -0.82 | -0.16 | -0.13 | -0.88 |
| 108255947 | npr3         | 1.91  | 0.54  | -0.57 | -0.53 | -0.08 |
| 108255795 | LOC108255795 | -1.01 | -0.85 | -0.45 | -0.73 | -0.61 |
| 108255318 | tmem175      | 1.82  | 1.23  | 1.31  | 1.28  | 1.06  |
| 108255921 | antxr2       | 1.04  | 0.12  | -0.16 | -0.08 | 0.14  |
| 108256043 | LOC108256043 | 1.82  | 0.89  | 0.58  | 0.68  | 0.83  |
| 108255873 | LOC108255873 | 1.06  | 0.73  | 0.48  | 0.43  | 0.28  |
| 108255689 | LOC108255689 | 1.87  | 1.61  | 0.32  | 0.01  | -0.30 |
| 108255687 | f2r          | 1.22  | 0.43  | -0.11 | 0.45  | 0.27  |
| 108255838 | LOC108255838 | 0.73  | 0.93  | 0.01  | 0.66  | 1.22  |
| 108255999 | malt1        | -1.35 | -0.71 | -0.41 | -0.29 | -0.34 |
| 108255976 | LOC108255976 | 4.05  | 3.04  | 2.68  | 2.42  | 2.41  |
| 108256042 | lhfp12       | 1.17  | 0.87  | 0.19  | 0.04  | 0.39  |
| 108255930 | rsrc2        | -1.04 | -0.76 | -0.65 | -0.83 | -0.60 |
| 108255908 | alkbh2       | 0.95  | 0.89  | 0.88  | 0.95  | 1.23  |
| 108277535 | LOC108277535 | -1.14 | 0.01  | 0.10  | 0.00  | 0.23  |
| 108255833 | iscu         | 1.13  | 0.72  | 0.69  | 0.87  | 0.89  |
| 108255809 | LOC108255809 | 1.10  | 0.48  | 0.17  | 0.11  | 0.19  |
| 100862734 | anxa1        | 1.07  | 0.67  | 0.46  | 0.12  | 0.16  |
| 108255933 | klf9         | -0.06 | -0.50 | -1.02 | -0.20 | 0.27  |
| 108255722 | LOC108255722 | 0.45  | 0.76  | 1.74  | 0.83  | 0.46  |
| 108255681 | LOC108255681 | 1.08  | 0.81  | 0.17  | 0.39  | 0.72  |
| 108256038 | sfrp1        | 2.22  | 1.00  | 0.00  | 0.73  | 0.95  |
| 108255535 | LOC108255535 | -1.09 | -0.85 | -0.42 | -0.92 | -0.53 |
| 100528582 | ak6          | 1.47  | 0.51  | 0.50  | 0.87  | 0.64  |
| 108255559 | LOC108255559 | -0.78 | -0.37 | -0.25 | -0.75 | -1.04 |
| 108255617 | LOC108255617 | 0.61  | 1.35  | 0.68  | 0.99  | 0.64  |
| 108255610 | LOC108255610 | 0.43  | 0.92  | 1.24  | 0.41  | 0.80  |
| 108255603 | LOC108255603 | 0.38  | 0.10  | -0.33 | -0.40 | -1.20 |
| 108255604 | LOC108255604 | 0.78  | 0.22  | 1.19  | -0.30 | -0.57 |
| 108255576 | LOC108255576 | 0.85  | 0.52  | 0.63  | 0.17  | 1.44  |
| 108255580 | LOC108255580 | 0.93  | 1.01  | 0.98  | 0.52  | 0.35  |
| 108255553 | LOC108255553 | 0.04  | 0.82  | 1.14  | 0.97  | 0.75  |

|           |              |       |       |       |       |       |
|-----------|--------------|-------|-------|-------|-------|-------|
| 108255637 | idua         | -1.02 | -0.59 | -0.46 | -0.70 | -0.53 |
| 108255648 | LOC108255648 | -0.83 | -0.66 | -0.75 | -1.19 | -0.98 |
| 108255446 | LOC108255446 | 0.54  | 0.81  | 1.39  | 0.82  | 0.62  |
| 108255435 | LOC108255435 | 0.19  | 0.74  | 1.08  | 0.74  | 0.89  |
| 108255439 | LOC108255439 | -1.68 | -0.81 | -0.63 | 0.54  | 0.01  |
| 108255441 | mmab         | -1.23 | -0.70 | -0.69 | -0.57 | -0.71 |
| 108256498 | ackr4        | 0.78  | 1.16  | 0.06  | 0.49  | 0.75  |
| 100528403 | pxdc1        | -0.45 | -0.35 | -1.33 | -0.26 | -0.62 |
| 108256396 | cct5         | 1.17  | 0.69  | 0.71  | 0.62  | 0.53  |
| 108256116 | fbxo15       | 1.62  | 2.15  | 2.06  | 0.89  | 1.83  |
| 108256732 | LOC108256732 | 0.45  | 0.68  | 0.79  | 0.92  | 1.56  |
| 108256458 | xkr9         | -1.10 | 0.01  | -0.29 | -0.41 | -0.35 |
| 108256114 | tagln3       | -1.12 | -0.25 | 0.18  | -0.29 | -0.33 |
| 108256740 | wasf3        | 0.20  | 0.04  | -1.15 | -0.03 | 0.46  |
| 108256407 | LOC108256407 | 1.39  | 0.89  | 0.69  | 0.19  | 0.53  |
| 108256369 | nktr         | -1.09 | -0.50 | -0.17 | -0.38 | -0.40 |
| 100528276 | acaal        | 1.16  | 0.75  | 0.25  | 0.20  | 0.25  |
| 108256393 | csrnp1       | -1.39 | 0.80  | -0.48 | -0.30 | 0.45  |
| 108256392 | LOC108256392 | -1.58 | -0.02 | -0.56 | -0.87 | 0.26  |
| 108256134 | cpa6         | -1.42 | -0.78 | 0.34  | -0.03 | 1.81  |
| 108256716 | tnfrsf11a    | -0.23 | -0.29 | -0.15 | -0.70 | -1.00 |
| 108256482 | LOC108256482 | 0.59  | -0.22 | -1.10 | -0.58 | 0.70  |
| 108256469 | LOC108256469 | -1.14 | -0.26 | 0.10  | -0.19 | -0.26 |
| 108256425 | LOC108256425 | -1.04 | -0.66 | -0.86 | -0.95 | -0.77 |
| 108256416 | pde7a        | -1.16 | -0.83 | -0.63 | -0.72 | -0.40 |
| 108256715 | rrs1         | 1.19  | 0.12  | -0.21 | 0.12  | 0.07  |
| 100528912 | ndufb4       | 1.07  | 0.55  | 0.44  | 0.45  | 0.38  |
| 108258254 | hopx         | -0.26 | -0.38 | 0.11  | 0.49  | 1.16  |
| 108256594 | LOC108256594 | -0.23 | -0.57 | -0.26 | 0.05  | 1.18  |
| 100528681 | cops9        | 1.05  | 0.78  | 0.52  | 0.60  | 0.49  |
| 108256440 | LOC108256440 | 0.07  | 0.46  | -0.36 | 0.74  | 1.09  |
| 108256641 | eif5a2       | 1.00  | 0.77  | 0.44  | 0.32  | 0.52  |
| 108256678 | LOC108256678 | 0.11  | 0.47  | -0.21 | 0.46  | 1.12  |
| 108256214 | gnal         | 0.12  | 0.36  | 0.64  | 0.98  | 1.51  |
| 108256213 | txndc5       | 1.08  | 0.59  | 0.25  | 0.22  | 0.41  |
| 108256397 | tmem67       | 1.39  | 0.68  | 0.33  | 0.67  | 0.40  |
| 108256403 | LOC108256403 | 1.59  | 0.71  | 0.39  | 0.66  | 0.58  |
| 108256738 | upk1a        | 1.59  | 0.87  | -0.15 | -0.01 | 0.03  |
| 108256625 | LOC108256625 | -0.31 | -0.05 | 0.35  | -1.02 | -0.69 |
| 108256532 | brd9         | -1.00 | -0.77 | -0.71 | -0.91 | -0.82 |
| 108256536 | tppp         | 0.68  | 0.37  | -0.29 | 1.06  | 0.82  |
| 108256657 | usf2         | -1.14 | -0.61 | -0.63 | -0.40 | -0.82 |
| 108256102 | efhb         | 0.09  | -0.12 | -0.41 | -0.91 | -1.59 |
| 108256553 | satb1        | -1.01 | -0.61 | -0.34 | 0.18  | -0.01 |
| 108256581 | LOC108256581 | -3.00 | -2.12 | -1.64 | -1.62 | -1.33 |

|           |              |       |       |       |       |       |
|-----------|--------------|-------|-------|-------|-------|-------|
| 108274527 | LOC108274527 | 1.45  | 0.62  | -0.40 | -0.37 | 0.28  |
| 108256183 | LOC108256183 | -0.63 | -0.26 | 0.84  | 1.29  | 0.92  |
| 108256188 | LOC108256188 | 0.37  | -0.35 | 0.30  | 1.13  | 0.85  |
| 108256728 | LOC108256728 | 1.02  | 0.65  | -0.20 | 0.13  | -0.17 |
| 108256307 | LOC108256307 | -1.08 | -0.85 | -0.63 | -0.66 | -0.44 |
| 108256288 | LOC108256288 | -0.14 | -0.28 | -0.30 | -0.85 | -1.45 |
| 108260334 | hs3st1       | 0.57  | 1.25  | 0.99  | 0.81  | 0.50  |
| 108256292 | LOC108256292 | 1.11  | 0.92  | 0.51  | 0.58  | 0.60  |
| 108256233 | LOC108256233 | -1.29 | -0.76 | -0.43 | -0.80 | -0.87 |
| 108256239 | cmc1         | 1.15  | 0.73  | 0.37  | 0.49  | 0.66  |
| 108256237 | azi2         | -1.05 | -0.67 | -0.28 | -0.44 | -0.71 |
| 108256242 | LOC108256242 | -0.41 | -0.57 | -0.13 | -0.51 | -1.38 |
| 108256250 | fbl          | 1.03  | 0.19  | -0.21 | 0.24  | 0.26  |
| 108256325 | LOC108256325 | 1.32  | 0.48  | 0.10  | 0.66  | 0.63  |
| 108259120 | slc2a9       | 0.63  | 0.82  | 1.04  | 0.72  | 0.76  |
| 108257011 | wipf3        | -1.25 | -0.59 | -0.94 | -0.76 | 0.00  |
| 108257014 | LOC108257014 | -1.00 | 0.92  | 0.18  | 0.36  | 0.84  |
| 108257007 | tril         | -0.10 | 1.08  | 0.64  | 0.86  | 0.16  |
| 108257460 | LOC108257460 | 1.31  | 0.08  | 0.29  | 0.78  | 0.18  |
| 108257471 | scx          | 0.27  | -0.57 | -1.28 | -0.09 | 0.02  |
| 108257444 | LOC108257444 | -1.16 | -0.86 | -0.47 | -0.41 | -0.54 |
| 108257459 | LOC108257459 | 0.00  | -0.33 | -1.14 | -0.94 | -0.29 |
| 108256958 | LOC108256958 | 2.58  | 1.40  | 1.21  | 1.48  | 1.57  |
| 108256967 | LOC108256967 | -2.17 | -0.77 | -0.31 | -0.42 | -0.24 |
| 108257247 | eif3h        | 1.11  | 0.81  | 0.80  | 0.55  | 0.67  |
| 108257248 | utp23        | 1.20  | 0.58  | 0.77  | 0.72  | 0.15  |
| 108257184 | cap2         | 0.69  | 0.52  | 0.59  | 0.75  | 1.52  |
| 100528515 | vps28        | 1.14  | 0.73  | 0.57  | 0.99  | 0.74  |
| 108257142 | tfap2e       | -0.16 | -0.93 | -0.22 | -0.88 | -1.15 |
| 100528966 | psmb2        | 1.44  | 0.70  | 0.55  | 0.80  | 0.31  |
| 108258773 | stk32b       | -0.18 | -0.51 | -0.30 | -0.57 | -1.07 |
| 108257072 | LOC108257072 | -1.56 | -0.59 | -0.35 | -0.83 | -0.55 |
| 108257071 | LOC108257071 | -0.72 | -0.76 | -0.65 | -0.85 | -1.08 |
| 108258791 | cytl1        | 2.90  | 0.98  | 0.14  | 0.89  | 0.31  |
| 108257356 | myo15a       | -0.40 | 0.29  | 0.44  | 0.84  | 1.92  |
| 108257060 | top3a        | -0.79 | -0.78 | -1.00 | -0.65 | -0.95 |
| 108256775 | slc29a4      | -0.99 | -0.18 | 0.51  | 0.53  | 1.64  |
| 108257246 | nudt1        | 1.88  | 0.57  | -0.15 | 0.03  | 0.33  |
| 108257245 | mrm2         | 1.19  | -0.40 | 0.60  | 1.14  | 0.75  |
| 108257383 | anp32e       | 1.16  | 0.76  | 0.42  | 0.62  | 0.69  |
| 108257116 | LOC108257116 | -1.11 | -0.59 | -0.48 | -0.70 | -0.71 |
| 108256990 | tinagl1      | 1.74  | 0.77  | 0.21  | 0.07  | 0.18  |
| 108257423 | mycl         | 1.03  | 0.07  | 0.38  | 0.92  | 0.56  |
| 108257228 | LOC108257228 | 0.21  | 0.20  | -1.29 | -0.53 | -0.09 |
| 108257167 | bmp8a        | 1.34  | 1.73  | 0.76  | 1.90  | 2.17  |



|           |              |       |       |       |       |       |
|-----------|--------------|-------|-------|-------|-------|-------|
| 100528307 | psa2         | 1.24  | 0.44  | 0.20  | 0.39  | 0.28  |
| 108257092 | LOC108257092 | -0.24 | -0.09 | 0.30  | 0.72  | 1.09  |
| 108257115 | fam133b      | -1.09 | -0.74 | -0.58 | -0.85 | -0.65 |
| 100528552 | hepacam2     | 0.67  | 0.46  | 0.13  | 0.88  | 1.13  |
| 108257075 | coll1a2      | 0.65  | 0.62  | 0.43  | 0.54  | 1.36  |
| 100528372 | rida         | 1.39  | 0.73  | -0.16 | 0.15  | 0.51  |
| 108278609 | tnrc6c       | -1.31 | -0.86 | -0.56 | -0.87 | -0.65 |
| 108257382 | LOC108257382 | 1.02  | 0.40  | -0.04 | -0.12 | 0.00  |
| 100528081 | yipf2        | 1.05  | 0.35  | 0.25  | 0.59  | 0.37  |
| 108257401 | LOC108257401 | -0.21 | -0.06 | 0.32  | -0.08 | -1.00 |
| 108257495 | tomm7        | 1.06  | 0.67  | 0.28  | 0.26  | 0.33  |
| 108278714 | LOC108278714 | 1.91  | 1.57  | 1.10  | 0.89  | 0.62  |
| 108257120 | LOC108257120 | -1.14 | -0.81 | -0.56 | -0.67 | -0.84 |
| 108257200 | pbx4         | -1.14 | -0.37 | -0.59 | -0.73 | -0.38 |
| 108256876 | LOC108256876 | -1.43 | -0.45 | -0.57 | -0.64 | -0.26 |
| 108256889 | LOC108256889 | 1.42  | 0.67  | 0.06  | 0.44  | 0.23  |
| 108257371 | LOC108257371 | -1.18 | -0.52 | -0.30 | -0.52 | -0.26 |
| 108257284 | LOC108257284 | -1.17 | -0.50 | 0.45  | -0.04 | -0.36 |
| 108257282 | LOC108257282 | -1.34 | -0.59 | 0.28  | -0.19 | -0.68 |
| 108257281 | LOC108257281 | -1.52 | -0.94 | 0.11  | -0.11 | -0.60 |
| 108257313 | LOC108257313 | -1.10 | -0.66 | 0.06  | -0.38 | -0.52 |
| 108257304 | LOC108257304 | 0.39  | -0.14 | 0.92  | -0.08 | 1.09  |
| 108257312 | seh1l        | 1.17  | 0.85  | 0.56  | 0.92  | 0.44  |
| 108257302 | LOC108257302 | 1.08  | 0.44  | -0.20 | -0.22 | -0.03 |
| 108257326 | LOC108257326 | -1.31 | -0.62 | 0.46  | -0.12 | -0.54 |
| 108278738 | caskin1      | -1.09 | -0.84 | -0.37 | -0.53 | -0.10 |
| 108257110 | LOC108257110 | -1.01 | -0.68 | -0.41 | -0.53 | -0.62 |
| 108256995 | LOC108256995 | 0.42  | 0.12  | -0.29 | 0.46  | 1.12  |
| 108256993 | LOC108256993 | -1.12 | -0.38 | 0.32  | -0.57 | -0.99 |
| 108257378 | LOC108257378 | 0.46  | 0.92  | 0.73  | 1.06  | 0.73  |
| 108258232 | LOC108258232 | 1.43  | -0.06 | -0.30 | -0.24 | 0.65  |
| 108258198 | ilvbl        | -0.30 | -0.32 | -0.35 | -1.00 | -1.17 |
| 108258234 | LOC108258234 | 1.32  | 1.18  | 0.60  | 0.81  | 1.15  |
| 108260780 | LOC108260780 | -1.35 | -0.88 | -0.79 | -0.44 | 0.18  |
| 108279648 | LOC108279648 | -1.10 | 0.19  | -0.10 | -0.44 | 0.01  |
| 108257691 | LOC108257691 | -0.28 | -0.29 | 0.68  | -2.93 | 0.83  |
| 108257911 | LOC108257911 | -0.28 | -0.04 | -1.06 | -0.86 | -0.66 |
| 108257830 | LOC108257830 | 1.20  | 0.33  | -0.34 | 0.80  | 0.61  |
| 108258118 | LOC108258118 | 1.81  | 0.92  | 0.88  | 0.82  | 0.46  |
| 108257772 | arnt1        | 0.58  | 0.63  | 0.49  | 1.03  | 0.69  |
| 108257994 | LOC108257994 | -0.91 | -0.63 | -0.89 | -1.30 | -0.90 |
| 108257755 | LOC108257755 | 1.15  | 0.40  | 0.72  | 0.38  | 0.43  |
| 108257940 | LOC108257940 | -1.26 | -0.41 | -0.54 | -0.36 | -0.05 |
| 108257942 | LOC108257942 | 1.06  | 0.54  | -0.06 | 0.29  | 0.88  |
| 100528767 | hdhc2        | 1.68  | 0.84  | 0.65  | 0.90  | 0.66  |

|           |              |       |       |       |       |       |
|-----------|--------------|-------|-------|-------|-------|-------|
| 108258125 | clu          | 1.57  | 0.82  | 0.79  | 0.71  | 0.46  |
| 108258052 | ndufaf7      | -0.34 | -0.42 | -1.32 | -0.79 | -0.92 |
| 108257557 | LOC108257557 | 1.18  | 0.50  | 0.30  | 0.29  | 0.10  |
| 108258245 | LOC108258245 | -1.27 | -0.95 | -0.61 | -0.15 | 0.52  |
| 108258185 | mcm3         | 1.52  | 0.49  | 0.01  | 0.53  | 0.31  |
| 108257522 | znf395       | 1.10  | 0.74  | 0.57  | 0.40  | 0.21  |
| 108257538 | LOC108257538 | 1.63  | 0.77  | 0.18  | 0.34  | 0.77  |
| 108257983 | sgcb         | 1.21  | 0.70  | 0.10  | 0.26  | 0.39  |
| 108258017 | rasl11b      | 0.81  | 0.00  | 0.02  | 1.13  | 0.63  |
| 108274163 | LOC108274163 | 2.82  | 1.14  | 0.29  | 1.00  | 0.82  |
| 108257920 | clock        | 0.60  | 1.09  | 0.85  | 0.75  | 0.96  |
| 108257517 | faslg        | -0.49 | -0.63 | -0.16 | -0.43 | -1.19 |
| 108257966 | LOC108257966 | 0.82  | 0.90  | 0.30  | 0.72  | 1.25  |
| 108257791 | myoc         | 3.82  | 0.79  | 0.31  | 0.77  | 0.46  |
| 108258151 | LOC108258151 | 1.34  | 0.89  | 0.48  | 0.78  | 0.54  |
| 108258058 | plpp3        | 1.14  | 0.49  | -0.07 | 0.19  | -0.09 |
| 100305016 | LOC100305016 | 1.22  | -0.20 | 0.43  | 1.03  | 0.80  |
| 108258010 | LOC108258010 | 1.27  | 0.95  | 0.48  | 0.21  | 0.28  |
| 108257544 | LOC108257544 | 1.82  | 0.86  | -0.79 | -0.34 | -0.36 |
| 108257513 | LOC108257513 | 0.03  | -0.15 | -0.12 | 0.69  | 1.10  |
| 100528159 | tdh          | -0.75 | 0.18  | -1.12 | -0.99 | 0.19  |
| 108258165 | sox7         | -0.99 | -0.29 | -0.96 | -1.02 | -0.51 |
| 108258176 | LOC108258176 | 0.00  | -0.15 | 0.67  | 1.07  | 0.88  |
| 108257851 | LOC108257851 | -0.58 | -0.79 | -1.03 | -0.70 | -0.40 |
| 108258019 | LOC108258019 | -0.68 | -0.80 | -0.01 | 0.57  | 1.74  |
| 108258023 | LOC108258023 | -0.44 | 0.95  | -1.02 | -0.58 | -0.95 |
| 108258091 | LOC108258091 | -0.31 | -0.08 | -0.28 | 0.68  | 1.93  |
| 108258111 | LOC108258111 | 1.02  | 0.72  | 0.70  | 0.57  | 0.26  |
| 100528439 | srp9         | 1.41  | 0.76  | 0.30  | 0.66  | 0.58  |
| 108257717 | filip1       | 0.83  | 0.32  | 0.01  | 0.41  | 1.35  |
| 108257888 | rbm25        | -1.04 | -0.64 | -0.31 | -0.32 | -0.49 |
| 108258075 | LOC108258075 | -1.02 | -0.21 | -0.32 | -0.90 | -0.27 |
| 108257857 | lpgat1       | 0.84  | 0.76  | 0.73  | 0.93  | 1.05  |
| 108258074 | slc30a1      | 0.77  | 0.98  | 0.89  | 1.08  | 0.98  |
| 108257935 | rhag         | 0.94  | 0.80  | 0.63  | 1.16  | 0.79  |
| 108258003 | LOC108258003 | 0.76  | 0.14  | 0.22  | 0.59  | 1.12  |
| 108257783 | LOC108257783 | 1.03  | 0.96  | 0.52  | 0.67  | 0.68  |
| 108257784 | LOC108257784 | -1.42 | -0.42 | -0.49 | -0.69 | -0.62 |
| 108257894 | LOC108257894 | -0.79 | -0.35 | 1.23  | 0.82  | 0.81  |
| 108257893 | LOC108257893 | -1.24 | -0.57 | 0.10  | 0.10  | 0.45  |
| 108257535 | LOC108257535 | 0.12  | 0.85  | 0.63  | 0.64  | 1.55  |
| 100528227 | ileu         | 1.26  | 0.04  | 0.05  | -0.77 | -0.78 |
| 108258143 | tnfrsf21     | 1.18  | 0.86  | 0.03  | 0.81  | 0.59  |
| 108258096 | enah         | -0.01 | 0.11  | 0.47  | 0.79  | 1.03  |
| 108257972 | LOC108257972 | -1.08 | -0.51 | -0.43 | -0.45 | 0.05  |

|           |              |       |       |       |       |       |
|-----------|--------------|-------|-------|-------|-------|-------|
| 108257845 | LOC108257845 | -1.10 | -0.90 | -1.02 | -0.99 | -0.98 |
| 108258684 | LOC108258684 | -1.18 | -0.42 | 0.37  | -0.32 | 0.06  |
| 108258979 | EIF3F        | 1.06  | 0.77  | 0.95  | 0.69  | 0.61  |
| 108258847 | LOC108258847 | -1.10 | -0.74 | -0.33 | -0.45 | -0.63 |
| 108258665 | LOC108258665 | -1.06 | -0.72 | -0.77 | -0.65 | -0.45 |
| 108258660 | PALB2        | -0.03 | -0.39 | -0.48 | -1.06 | -0.69 |
| 108258959 | TLR2         | -0.52 | -0.50 | 0.02  | 1.05  | 0.54  |
| 108258397 | LOC108258397 | 0.15  | 0.65  | 1.22  | 2.12  | 3.35  |
| 108258513 | LOC108258513 | -1.12 | -0.86 | -1.28 | -1.15 | -1.60 |
| 108258631 | LOC108258631 | -1.19 | -0.72 | -0.36 | -0.28 | 0.07  |
| 108258630 | LOC108258630 | -1.03 | -0.90 | -0.47 | -0.81 | 0.15  |
| 108258568 | LOC108258568 | 0.50  | 1.31  | 0.67  | 0.82  | 0.45  |
| 108260328 | LOC108260328 | -1.04 | -0.61 | 0.40  | -0.74 | -0.21 |
| 108258567 | LOC108258567 | -0.45 | -0.58 | -1.09 | -0.48 | 0.02  |
| 108258400 | LOC108258400 | -1.09 | -0.38 | -0.54 | -0.97 | -0.75 |
| 108258881 | LOC108258881 | -1.58 | -0.63 | 0.26  | 0.24  | -0.37 |
| 108258361 | LOC108258361 | -0.39 | 0.11  | 1.36  | 2.77  | 4.65  |
| 108258369 | LOC108258369 | -1.19 | -0.52 | 0.42  | -0.09 | -0.76 |
| 108258348 | PARD3B       | -1.03 | -0.74 | -0.70 | -0.74 | -0.65 |
| 108258362 | LOC108258362 | -1.46 | -0.60 | -0.12 | -0.14 | -0.15 |
| 108258370 | LOC108258370 | -1.40 | -0.37 | -0.07 | -0.38 | 0.08  |
| 108258374 | LOC108258374 | -0.24 | -0.04 | 0.25  | 1.09  | -0.65 |
| 108258872 | LOC108258872 | -1.50 | -0.99 | -0.71 | -0.18 | 0.36  |
| 108259006 | JAM2         | -0.01 | -0.04 | -1.15 | -0.36 | -0.32 |
| 108258599 | DCUN1D2      | 0.69  | 0.73  | 0.98  | 0.77  | 1.15  |
| 108258935 | IONRF2       | -1.04 | -0.65 | -0.31 | -0.45 | -0.19 |
| 100528804 | PRPS2        | 1.61  | 0.99  | 0.41  | 0.50  | 0.80  |
| 108258318 | LOC108258318 | 1.26  | -0.45 | 0.23  | 0.44  | -0.50 |
| 108258282 | LOC108258282 | 0.01  | 0.47  | 0.91  | 1.15  | 0.66  |
| 108258297 | LOC108258297 | -0.75 | -0.98 | -1.11 | -0.79 | -0.33 |
| 108259004 | LOC108259004 | 1.00  | 0.58  | 0.22  | 0.33  | 0.33  |
| 108258862 | LOC108258862 | -0.97 | -1.41 | -0.44 | 0.47  | -0.61 |
| 108259043 | LOC108259043 | -0.64 | -0.57 | -0.76 | -0.54 | -1.18 |
| 108259029 | LOC108259029 | 1.06  | 0.24  | -0.23 | -0.37 | 0.05  |
| 108259013 | TCEANC       | 1.02  | 0.49  | 0.83  | 0.72  | 0.43  |
| 108258342 | LOC108258342 | 2.60  | 0.67  | 0.60  | 0.87  | 0.65  |
| 108259002 | LOC108259002 | -1.40 | -0.58 | -0.42 | 0.08  | -0.25 |
| 108258334 | LOC108258334 | 1.27  | 0.51  | 0.02  | -0.48 | -1.29 |
| 108258896 | NEURL1       | 0.79  | 1.00  | 0.83  | 0.77  | 0.72  |
| 100528152 | CAB39L       | 1.22  | 0.84  | 0.48  | 0.94  | 0.52  |
| 108258841 | ATP11A       | 0.87  | 0.99  | 1.00  | 1.19  | 0.64  |
| 108258617 | LOC108258617 | 0.58  | 0.66  | 1.05  | 1.75  | 1.43  |
| 108258505 | LOC108258505 | -1.14 | -0.43 | 0.07  | -0.06 | -0.12 |
| 100304672 | LOC100304672 | 1.06  | 0.31  | 0.08  | 0.42  | 0.42  |
| 108258499 | LOC108258499 | 1.06  | 0.69  | 0.58  | 0.91  | 0.61  |

|           |              |       |       |       |       |       |
|-----------|--------------|-------|-------|-------|-------|-------|
| 108258507 | LOC108258507 | 1.13  | 0.80  | 0.24  | 0.32  | 0.53  |
| 108258502 | pld6         | -0.94 | -0.78 | -0.81 | -1.20 | -0.34 |
| 108258490 | tm9sf2       | 1.12  | 0.76  | 0.48  | 0.99  | 0.75  |
| 108279681 | mettl24      | 2.15  | 1.46  | 0.70  | 0.62  | 1.17  |
| 108258698 | LOC108258698 | -1.10 | -0.78 | -0.53 | -0.79 | -0.75 |
| 108259007 | LOC108259007 | -1.05 | -0.61 | -0.47 | -0.36 | -0.37 |
| 100528704 | mzt1         | 1.12  | 0.46  | 0.02  | 0.33  | 0.24  |
| 108258655 | LOC108258655 | 1.38  | 0.11  | -0.24 | -0.25 | 0.12  |
| 108259070 | LOC108259070 | -0.66 | -0.68 | 0.17  | 0.54  | 1.50  |
| 108258280 | arl6         | 0.64  | 1.14  | 0.97  | 0.44  | -0.15 |
| 108258675 | tpt1         | 1.18  | 0.92  | 0.67  | 0.65  | 0.71  |
| 108258676 | LOC108258676 | 1.44  | 0.15  | 0.08  | -0.24 | -1.11 |
| 108259084 | LOC108259084 | -1.12 | -0.51 | -0.03 | 0.14  | 0.06  |
| 108258967 | LOC108258967 | -1.72 | -0.71 | 0.15  | -0.28 | 0.02  |
| 108258966 | LOC108258966 | -1.01 | -0.67 | -0.06 | 0.01  | 0.18  |
| 108258970 | LOC108258970 | -1.44 | -0.72 | -0.61 | -0.37 | -0.40 |
| 108258969 | LOC108258969 | -1.67 | -1.04 | -0.66 | -0.76 | -0.76 |
| 108258279 | LOC108258279 | -1.04 | -0.76 | -0.72 | -0.25 | -0.07 |
| 108274592 | LOC108274592 | -1.43 | -0.74 | -0.27 | -0.34 | -0.24 |
| 108258541 | actr2        | 1.23  | 0.89  | 0.46  | 0.61  | 0.55  |
| 108258540 | atg4d        | 0.81  | 0.68  | 0.56  | 1.04  | 0.94  |
| 108258652 | LOC108258652 | 1.01  | 0.64  | 0.30  | 0.23  | 0.30  |
| 108259074 | LOC108259074 | 1.51  | 0.88  | 0.42  | 0.37  | 0.49  |
| 108259073 | LOC108259073 | -0.82 | -1.10 | 0.25  | 0.70  | 0.86  |
| 108258997 | srd5a2       | 0.09  | 0.65  | -0.05 | 1.26  | 0.82  |
| 108258467 | LOC108258467 | -0.16 | -0.52 | -0.28 | 0.63  | 1.11  |
| 108258464 | LOC108258464 | -0.74 | -1.05 | 0.66  | 0.14  | 1.40  |
| 108258455 | LOC108258455 | -1.20 | -0.55 | -0.71 | -0.90 | -0.53 |
| 108258465 | mb           | -0.15 | -0.16 | -1.37 | -0.56 | -0.29 |
| 108258450 | mri1         | 1.18  | 0.67  | 0.16  | 0.83  | 0.13  |
| 108258434 | LOC108258434 | -0.32 | -0.04 | -0.47 | -1.30 | -0.37 |
| 108258437 | LOC108258437 | -0.71 | 0.71  | 1.31  | 0.20  | 0.90  |
| 108258442 | LOC108258442 | -1.23 | -0.38 | -0.43 | -0.75 | -0.38 |
| 108258478 | LOC108258478 | 0.37  | 0.77  | 1.05  | 0.83  | 0.31  |
| 108258416 | LOC108258416 | -1.00 | -0.33 | -0.03 | -0.12 | -0.06 |
| 108258715 | LOC108258715 | 1.89  | 0.67  | -0.23 | 0.29  | 0.03  |
| 108258417 | LOC108258417 | 1.03  | 0.96  | 0.99  | 0.56  | 0.52  |
| 108274403 | c2h8orf82    | 1.10  | 0.14  | 0.64  | 0.43  | 0.34  |
| 108258724 | LOC108258724 | 1.35  | 0.59  | 0.31  | 0.24  | 0.28  |
| 108258766 | LOC108258766 | -1.25 | -0.48 | 0.28  | -0.35 | -0.38 |
| 108258774 | LOC108258774 | -1.17 | -0.49 | -0.27 | -0.56 | -0.49 |
| 108258781 | LOC108258781 | -1.41 | -0.65 | -0.37 | -0.74 | -0.66 |
| 108279824 | LOC108279824 | -1.16 | -0.62 | -0.58 | -0.68 | -0.56 |
| 108258808 | LOC108258808 | -0.24 | -0.01 | 0.54  | 0.89  | 1.05  |
| 108258822 | LOC108258822 | -1.33 | -0.68 | -0.16 | 0.02  | -0.17 |

|           |              |       |       |       |       |       |
|-----------|--------------|-------|-------|-------|-------|-------|
| 108258426 | LOC108258426 | -0.74 | -0.59 | -0.38 | -0.90 | -1.19 |
| 108258760 | LOC108258760 | -0.12 | -0.21 | 0.22  | -1.12 | -0.30 |
| 108258744 | LOC108258744 | -1.09 | -0.87 | -0.66 | -0.61 | -0.67 |
| 100528177 | akr          | 1.09  | 0.35  | 0.19  | 0.32  | 0.87  |
| 108258727 | LOC108258727 | -1.26 | -0.63 | -0.66 | -0.92 | -0.76 |
| 108258776 | LOC108258776 | -1.40 | -0.75 | -0.42 | -0.81 | -0.89 |
| 108259670 | LOC108259670 | 1.09  | 0.62  | 0.26  | 0.36  | 0.42  |
| 108259226 | cmtm3        | 0.70  | 0.44  | 0.40  | 0.65  | 1.35  |
| 108259227 | cklf         | 0.11  | 0.82  | 0.02  | 0.88  | 1.29  |
| 108259611 | cdh5         | 1.33  | 0.98  | 1.17  | 1.19  | 1.04  |
| 108274608 | LOC108274608 | -1.27 | -0.64 | 0.54  | 0.68  | 0.60  |
| 108259592 | orc6         | 1.44  | 0.76  | -0.09 | 0.26  | 0.48  |
| 100528973 | calml4       | -1.17 | -0.27 | -0.03 | -0.59 | -0.14 |
| 108259370 | LOC108259370 | -1.12 | -0.64 | 0.49  | 0.16  | 0.69  |
| 108259657 | cebpa        | -1.34 | -0.77 | -0.52 | 0.35  | 0.92  |
| 108259217 | papd5        | -1.01 | -0.63 | -0.42 | -0.80 | -0.73 |
| 108259218 | adcyl7       | -1.12 | -0.64 | -0.40 | -0.48 | -0.22 |
| 108259146 | agrp         | 1.09  | 0.66  | 0.23  | -0.56 | -0.55 |
| 108259685 | LOC108259685 | 0.40  | -0.07 | -0.50 | 0.62  | 1.25  |
| 108259646 | LOC108259646 | 1.07  | 0.86  | 0.77  | 0.57  | 0.18  |
| 108259295 | bbox1        | -0.69 | -0.52 | -0.45 | -1.24 | -0.86 |
| 108280227 | LOC108280227 | 1.18  | 0.89  | 0.13  | 0.99  | 0.95  |
| 108259193 | LOC108259193 | 1.15  | 1.63  | 1.79  | 2.04  | 4.56  |
| 108259329 | LOC108259329 | 0.99  | 0.55  | 0.60  | 1.17  | 0.42  |
| 108259333 | LOC108259333 | -0.86 | -0.75 | -0.11 | -0.55 | -1.29 |
| 108259365 | mfap1        | 1.08  | 0.54  | 0.38  | 0.63  | 0.46  |
| 108259260 | LOC108259260 | 0.10  | 0.38  | 0.76  | 0.97  | 2.72  |
| 108257033 | LOC108257033 | -1.24 | -0.81 | -0.74 | -0.99 | -0.48 |
| 108259377 | LOC108259377 | -1.06 | -0.71 | -0.33 | -0.37 | -0.11 |
| 108259300 | adam10       | 1.09  | 0.76  | 0.50  | 0.67  | 0.54  |
| 108275265 | LOC108275265 | -0.83 | -0.98 | -0.64 | -0.97 | -1.77 |
| 108259272 | f2           | -1.48 | -0.87 | -0.58 | -0.88 | -0.67 |
| 108256824 | lrp11        | -1.03 | -0.89 | -0.35 | -0.45 | -0.05 |
| 108259540 | LOC108259540 | 0.18  | 0.32  | 0.88  | 1.13  | 0.58  |
| 108259534 | LOC108259534 | -1.50 | -0.77 | -0.26 | -0.23 | 0.15  |
| 108259481 | LOC108259481 | 0.15  | 0.57  | 1.31  | 0.46  | 0.44  |
| 108259515 | LOC108259515 | 0.41  | 0.71  | 0.92  | 0.58  | 2.31  |
| 108259499 | LOC108259499 | 0.26  | 0.12  | 0.53  | 0.34  | 1.36  |
| 108259504 | ftcd         | -0.44 | -0.22 | -0.21 | -1.01 | -0.17 |
| 108259529 | fam207a      | 1.27  | 0.63  | 0.73  | 0.53  | 0.55  |
| 108259541 | npb          | -0.96 | -0.67 | -0.54 | -1.11 | -0.60 |
| 108259505 | sgsh         | -1.00 | -0.53 | -0.32 | -0.53 | -0.72 |
| 100528783 | mli1b        | -0.53 | -0.45 | -0.85 | -1.08 | -0.73 |
| 108259526 | LOC108259526 | -1.91 | -0.80 | 0.29  | -0.31 | 0.19  |
| 108259252 | LOC108259252 | -1.30 | -0.48 | -0.63 | -0.28 | 0.04  |

|           |              |       |       |       |       |       |
|-----------|--------------|-------|-------|-------|-------|-------|
| 108259254 | LOC108259254 | 0.87  | 1.13  | -0.17 | 0.25  | 0.84  |
| 108259398 | LOC108259398 | -0.23 | -0.57 | -0.72 | -1.11 | -0.49 |
| 108259397 | adgrg7       | -0.43 | -0.03 | 0.10  | 0.52  | 1.34  |
| 108256918 | ginm1        | 1.26  | 0.81  | 0.64  | 0.79  | 0.51  |
| 108259425 | LOC108259425 | 1.16  | 0.16  | -0.01 | 0.52  | 0.70  |
| 108259436 | LOC108259436 | 0.84  | 1.02  | 0.52  | 0.32  | -0.10 |
| 108259444 | mrps28       | 1.28  | 0.59  | 0.49  | 0.51  | 0.14  |
| 108259454 | LOC108259454 | -0.71 | -0.55 | -0.60 | -1.58 | -1.06 |
| 100528932 | rnd3         | -1.08 | -0.22 | -0.44 | -0.38 | 0.08  |
| 108259241 | LOC108259241 | -1.21 | -0.64 | -0.75 | -0.69 | -0.92 |
| 108259620 | LOC108259620 | 0.38  | 1.01  | 0.50  | 0.30  | -0.23 |
| 108260052 | LOC108260052 | -0.79 | -0.10 | -1.13 | -0.10 | 0.63  |
| 108257037 | LOC108257037 | -0.87 | -0.12 | -0.14 | -0.33 | -1.03 |
| 108259989 | LOC108259989 | -1.20 | -0.69 | -0.31 | -0.51 | -0.99 |
| 108260038 | LOC108260038 | -0.81 | -0.86 | -0.80 | -1.06 | -0.49 |
| 108260034 | LOC108260034 | -0.96 | -0.45 | -0.56 | -0.75 | -1.25 |
| 108259908 | LOC108259908 | -1.41 | -0.47 | -0.41 | -0.19 | -0.22 |
| 108260008 | LOC108260008 | 1.41  | 0.85  | 0.62  | 0.32  | -0.08 |
| 108260251 | LOC108260251 | -1.46 | -0.44 | -0.15 | -0.25 | -0.21 |
| 108259858 | LOC108259858 | -1.10 | -0.82 | -0.46 | -0.67 | -0.77 |
| 108263662 | LOC108263662 | -1.25 | -0.71 | -0.05 | -0.42 | -0.11 |
| 100528947 | tagl         | 1.05  | 0.70  | 0.22  | 0.24  | 0.52  |
| 108259857 | rnf214       | -1.01 | -0.67 | -0.28 | -0.47 | -0.35 |
| 108259860 | LOC108259860 | -1.34 | -0.91 | -0.25 | 0.17  | -0.68 |
| 108259947 | LOC108259947 | -1.21 | -0.74 | -0.54 | -0.60 | -0.93 |
| 108259949 | LOC108259949 | -1.04 | -0.53 | 0.14  | -0.68 | 0.12  |
| 108256151 | LOC108256151 | -1.02 | -0.57 | -0.57 | -0.38 | 0.11  |
| 108260367 | LOC108260367 | -1.41 | -0.47 | 0.49  | 0.86  | 1.22  |
| 108260230 | LOC108260230 | 0.29  | 0.62  | 0.44  | 0.81  | 1.40  |
| 108254755 | arv1         | -1.24 | -0.72 | -0.63 | -0.76 | -0.84 |
| 108260121 | sik2         | -0.90 | -0.77 | -1.05 | -0.76 | -0.39 |
| 108260310 | LOC108260310 | 1.40  | 0.24  | -0.43 | 0.04  | -0.12 |
| 108259747 | nrgn         | 1.32  | 0.81  | 0.14  | 0.75  | 0.84  |
| 108259706 | mis12        | 1.14  | 0.07  | 0.17  | 0.01  | 0.33  |
| 108260301 | LOC108260301 | -1.04 | -0.68 | -0.37 | -0.44 | -0.34 |
| 108260293 | tmem132e     | 1.46  | 0.85  | 1.00  | 1.00  | 0.64  |
| 108259719 | alkbh4       | 1.02  | 0.51  | 0.34  | 0.64  | 0.81  |
| 108260471 | gnpat        | 1.03  | 0.97  | 0.89  | 0.65  | 0.61  |
| 100528941 | snaa         | 1.01  | 0.64  | -0.50 | 0.67  | 0.31  |
| 108259900 | LOC108259900 | 1.12  | 0.29  | 0.14  | 0.62  | 0.20  |
| 108259718 | foxd1        | 1.15  | 0.52  | -0.24 | 0.38  | 0.38  |
| 108260058 | LOC108260058 | -1.10 | -0.34 | -0.17 | -0.55 | -0.21 |
| 108254952 | LOC108254952 | -1.13 | -1.02 | -0.50 | -0.73 | -1.54 |
| 100528075 | surf1        | 1.02  | 0.96  | 0.85  | 0.72  | 0.78  |
| 108254884 | scara5       | 1.37  | 0.17  | -0.20 | 0.22  | 0.06  |

|           |              |       |       |       |       |       |
|-----------|--------------|-------|-------|-------|-------|-------|
| 100528741 | atp5l        | 1.28  | 0.75  | 0.44  | 0.50  | 0.54  |
| 108260105 | LOC108260105 | 1.32  | 0.62  | 0.50  | 0.21  | 0.51  |
| 108254877 | LOC108254877 | -1.46 | 0.11  | -0.23 | -0.35 | 0.45  |
| 108260428 | tim8b        | 1.76  | 0.88  | 0.64  | 0.98  | 0.74  |
| 108275278 | tab2         | -1.02 | -0.64 | -0.37 | -0.70 | -0.48 |
| 108260421 | LOC108260421 | 1.31  | 0.95  | 0.43  | 0.17  | 0.49  |
| 108260315 | LOC108260315 | 1.03  | 0.47  | 0.41  | 0.52  | 0.40  |
| 100528220 | ube2g1       | 1.43  | 0.79  | 0.49  | 0.90  | 0.70  |
| 108257771 | LOC108257771 | 0.69  | 0.25  | 0.97  | 1.08  | 0.69  |
| 108259720 | LOC108259720 | -1.44 | -0.24 | -0.44 | -0.08 | -0.12 |
| 108260065 | LOC108260065 | -0.62 | -0.50 | -0.33 | -1.47 | -0.57 |
| 108260422 | hspb1        | 2.00  | 0.85  | 0.11  | 0.62  | 0.67  |
| 108260042 | LOC108260042 | -1.18 | -0.69 | -0.54 | -0.31 | -0.49 |
| 108257623 | LOC108257623 | -0.10 | -0.12 | -0.20 | 0.10  | -1.18 |
| 108257748 | LOC108257748 | -1.49 | -0.63 | -0.13 | 0.20  | -0.27 |
| 108260056 | LOC108260056 | 1.18  | 0.77  | 0.41  | 0.52  | 0.62  |
| 108259919 | LOC108259919 | -1.01 | -0.52 | -0.04 | 0.03  | -0.21 |
| 108275291 | LOC108275291 | -1.22 | -0.68 | -0.36 | -0.23 | -0.11 |
| 100528817 | spr          | 1.19  | 0.13  | -0.05 | 0.40  | 0.17  |
| 108257502 | LOC108257502 | -0.90 | -1.11 | -0.68 | -0.38 | -0.44 |
| 108259998 | LOC108259998 | -1.62 | -0.91 | -0.70 | -0.69 | -0.74 |
| 108260017 | LOC108260017 | -1.04 | -0.88 | -0.84 | -0.89 | -0.31 |
| 108259959 | dnajc25      | 1.17  | 0.41  | 0.05  | 0.73  | 0.49  |
| 108260390 | lrrc19       | 1.38  | 0.65  | 0.45  | 0.88  | 0.56  |
| 108275302 | LOC108275302 | -0.71 | -0.42 | -0.72 | -0.83 | -1.27 |
| 108260354 | trim32       | 1.15  | 0.71  | 0.49  | 0.87  | 0.57  |
| 108260284 | LOC108260284 | -0.59 | -0.96 | -0.98 | -1.02 | -0.56 |
| 108257829 | fam228b      | -0.61 | -1.47 | -0.69 | -0.79 | -0.74 |
| 108260172 | fam78a       | -1.11 | -0.63 | -0.29 | -0.55 | -0.56 |
| 108260193 | LOC108260193 | -0.66 | -0.44 | 0.59  | 1.15  | 0.98  |
| 108260188 | LOC108260188 | -0.70 | -0.88 | -0.26 | -0.95 | -1.38 |
| 108260143 | LOC108260143 | 0.58  | 1.29  | 0.75  | 0.35  | -0.16 |
| 100304496 | eno3         | -1.36 | -0.59 | -0.87 | -0.48 | -0.79 |
| 108260153 | LOC108260153 | -0.62 | -1.03 | -0.49 | -0.16 | -0.64 |
| 108260162 | LOC108260162 | 1.83  | 0.41  | 0.38  | 0.46  | 0.22  |
| 108260204 | LOC108260204 | 1.58  | 0.92  | 0.56  | 0.26  | 0.32  |
| 108260134 | srrt         | -1.10 | -0.73 | -0.60 | -0.93 | -0.95 |
| 108260136 | arhgef15     | -1.39 | -0.57 | -0.22 | 0.04  | -0.03 |
| 108260690 | LOC108260690 | 1.03  | 0.52  | 0.09  | 0.30  | 0.73  |
| 108260559 | LOC108260559 | -0.92 | -0.75 | -0.58 | -1.07 | -0.98 |
| 108260691 | LOC108260691 | -1.23 | -0.28 | -0.05 | -0.68 | -0.46 |
| 100528838 | tsn5         | 2.21  | 1.45  | 0.60  | 1.13  | 1.21  |
| 108257474 | hadha        | 0.32  | -0.02 | -0.40 | -1.17 | -0.88 |
| 108260776 | LOC108260776 | -1.01 | -0.85 | -0.62 | -0.70 | -0.59 |
| 108260950 | LOC108260950 | 1.53  | -0.19 | -0.28 | 0.28  | -0.28 |

|           |              |       |       |       |       |       |
|-----------|--------------|-------|-------|-------|-------|-------|
| 108260714 | LOC108260714 | -1.25 | -0.29 | -0.70 | -0.28 | 0.46  |
| 108257788 | LOC108257788 | -0.93 | -1.29 | -0.28 | -0.66 | -0.56 |
| 108260842 | ugt8         | 1.02  | 0.49  | 0.04  | 0.30  | 0.67  |
| 108260920 | 1-Mar        | -0.18 | -0.80 | -0.74 | -1.17 | -1.06 |
| 100305020 | anxa5        | 1.02  | 0.60  | 0.16  | 0.16  | 0.12  |
| 108260831 | uchl1        | 1.27  | -0.43 | -0.40 | -0.56 | 0.09  |
| 108257712 | LOC108257712 | -1.32 | -0.45 | -0.36 | -0.28 | -0.52 |
| 108260974 | fbxo28       | 1.05  | 0.67  | 0.48  | 0.99  | 0.46  |
| 108260546 | LOC108260546 | 1.09  | 0.48  | -0.23 | 0.65  | 0.74  |
| 108260945 | efemp1       | 1.54  | 0.90  | 0.43  | 0.03  | 0.10  |
| 108260959 | slit1        | 1.32  | 0.36  | -0.32 | 0.00  | 0.36  |
| 100528215 | emc4         | 1.17  | 0.73  | 0.24  | 0.69  | 0.77  |
| 108261008 | hgfac        | -0.18 | -0.71 | -1.08 | -0.89 | -0.91 |
| 100528446 | pp1b         | 1.01  | 0.61  | 0.52  | 0.71  | 0.86  |
| 108260932 | LOC108260932 | -0.98 | -1.38 | -0.25 | -0.37 | -0.76 |
| 108260761 | LOC108260761 | -1.51 | -0.72 | 0.77  | 0.97  | 0.37  |
| 108260550 | LOC108260550 | 0.59  | -0.02 | -0.33 | -0.01 | 1.25  |
| 108260653 | sh3d19       | -1.58 | -0.76 | -0.56 | -0.95 | -0.66 |
| 108260729 | LOC108260729 | -1.90 | -0.82 | -0.27 | -0.65 | -0.67 |
| 108260492 | LOC108260492 | 0.67  | 0.56  | 0.41  | 0.78  | 1.57  |
| 108260508 | LOC108260508 | -1.09 | -0.17 | -0.24 | -0.79 | -0.42 |
| 108260520 | LOC108260520 | 1.31  | 0.37  | 0.51  | 1.27  | 1.73  |
| 108260511 | slc9b2       | 0.88  | 0.22  | 0.75  | 1.28  | 0.70  |
| 108260534 | LOC108260534 | 3.32  | 1.85  | 1.35  |       |       |
| 108260530 | LOC108260530 | 0.86  | 0.78  | 1.00  | 0.79  | 0.57  |
| 108260603 | LOC108260603 | -1.01 | -0.81 | -0.50 | -0.64 | -0.32 |
| 108260628 | LOC108260628 | 1.74  | 0.68  | 0.24  | 0.53  | 0.46  |
| 108260624 | LOC108260624 | -0.10 | -0.09 | 0.77  | 1.16  | 0.74  |
| 108260623 | ccdc86       | 1.14  | 0.64  | 0.77  | 0.78  | 0.74  |
| 108260613 | LOC108260613 | 0.12  | -0.56 | -1.29 | -0.68 | -0.27 |
| 108261049 | LOC108261049 | 1.10  | 0.77  | 0.52  | 0.25  | 0.31  |
| 108261048 | LOC108261048 | -0.14 | -0.33 | -0.65 | -0.95 | -1.22 |
| 108261056 | LOC108261056 | -0.37 | 0.23  | -0.32 | 1.04  | 0.81  |
| 108261064 | eif4e2       | 1.19  | 0.91  | 0.32  | 0.51  | 0.50  |
| 108261122 | LOC108261122 | 0.13  | -1.45 | 0.41  | -0.06 | -0.24 |
| 108261134 | LOC108261134 | -1.90 | -0.20 | 0.87  | 0.27  | 1.53  |
| 108261135 | LOC108261135 | 0.45  | 0.44  | 1.03  | 0.27  | 0.95  |
| 108261144 | LOC108261144 | 1.05  | 0.66  | 0.27  | -0.14 | 0.52  |
| 108261163 | LOC108261163 | 0.75  | -0.25 | 1.15  | 1.77  | 3.58  |
| 108261165 | LOC108261165 | -1.95 | -1.00 | 0.01  | 0.47  | -0.58 |
| 108261164 | LOC108261164 | -0.37 | -0.41 | 0.32  | 0.76  | 1.72  |
| 108261167 | LOC108261167 | 0.47  | 0.63  | 0.82  | 1.13  | 0.76  |
| 108261175 | LOC108261175 | 0.40  | 0.40  | 0.97  | 1.17  | 0.74  |
| 108261177 | LOC108261177 | 0.81  | 0.60  | 1.18  | 0.37  | 0.73  |
| 108261190 | LOC108261190 | 2.44  | 1.63  | 1.82  | 0.86  | 1.68  |



|           |              |       |       |       |       |       |
|-----------|--------------|-------|-------|-------|-------|-------|
| 108261200 | LOC108261200 | -1.10 | -0.18 | -0.46 | -0.63 | -0.69 |
| 108255118 | tube1        | 0.09  | -0.71 | -0.84 | -1.32 | -0.68 |
| 108261204 | LOC108261204 | -0.07 | -1.07 | -0.70 | -0.70 | -0.08 |
| 108261227 | LOC108261227 | -1.41 | -0.30 | 0.33  | 0.51  | -0.50 |
| 108261229 | LOC108261229 | -1.00 | -0.64 | 0.11  | -0.12 | -1.06 |
| 108261257 | LOC108261257 | -1.20 | -0.62 | -0.18 | -0.12 | -0.26 |
| 108261262 | LOC108261262 | -1.75 | -0.71 | -0.18 | 0.09  | 0.09  |
| 108261268 | LOC108261268 | -0.21 | -0.05 | 0.43  | 0.93  | 1.09  |
| 108261273 | LOC108261273 | -0.11 | -1.29 | 0.00  | -0.51 | -0.47 |
| 108261294 | LOC108261294 | -1.09 | -0.39 | -0.94 | 1.01  | 0.31  |
| 108261317 | LOC108261317 | 0.75  | 0.06  | -0.19 | 0.08  | 1.36  |
| 108261344 | LOC108261344 | 0.43  | -0.08 | -0.24 | -0.34 | -1.04 |
| 108261345 | LOC108261345 | 0.35  | -0.22 | -0.20 | -0.82 | -1.55 |
| 108261348 | LOC108261348 | -0.90 | -0.70 | -0.29 | -0.98 | -1.36 |
| 108261385 | LOC108261385 | -1.54 | -0.57 | -0.62 | -0.80 | -0.36 |
| 108261451 | LOC108261451 | -1.08 | -0.30 | 0.08  | -0.02 | -0.46 |
| 108261474 | LOC108261474 | -2.86 | -0.12 | -0.81 | -1.28 | -0.96 |
| 108261507 | LOC108261507 | -1.44 | -0.59 | 0.38  | 0.61  | 0.44  |
| 108261512 | LOC108261512 | 0.34  | 0.18  | 0.64  | 1.33  | 0.62  |
| 108261536 | LOC108261536 | 0.11  | -0.51 | -0.33 | -1.16 | -0.37 |
| 108255388 | LOC108255388 | -0.40 | 1.36  | 0.08  | 0.41  | 0.42  |
| 108261552 | LOC108261552 | -1.68 | -1.51 | -0.79 | -1.10 | -0.66 |
| 108261553 | LOC108261553 | 1.96  | 1.55  | 0.33  | 1.57  | 1.07  |
| 108261558 | LOC108261558 | -0.54 | -0.45 | -0.65 | -1.01 | -0.46 |
| 108255397 | batf         | -0.75 | 0.71  | 0.19  | 0.63  | 1.45  |
| 108261586 | LOC108261586 | -1.29 | -0.49 | 0.08  | -0.16 | -0.73 |
| 108261587 | LOC108261587 | -0.98 | -1.14 | -0.50 | -0.52 | -0.79 |
| 108261625 | LOC108261625 | -0.58 | 0.55  | 1.02  | -0.57 | 0.85  |
| 108255437 | LOC108255437 | -1.35 | -0.95 | -0.61 | -0.42 | -0.26 |
| 108261646 | LOC108261646 | 0.69  | 0.01  | -0.05 | 0.65  | 1.30  |
| 108261662 | LOC108261662 | 0.67  | 0.58  | 0.74  | 1.40  | 0.85  |
| 108261663 | LOC108261663 | -0.99 | -0.05 | -0.42 | -1.07 | -0.39 |
| 108255503 | LOC108255503 | 0.17  | 0.49  | 0.31  | 1.05  | 0.81  |
| 108261704 | LOC108261704 | 0.45  | 0.62  | 0.81  | 1.18  | 0.81  |
| 108261708 | LOC108261708 | -0.12 | -0.01 | 1.41  | 1.21  | 0.69  |
| 108261714 | LOC108261714 | 0.62  | 0.75  | 0.99  | 0.64  | 1.16  |
| 108261740 | LOC108261740 | 1.46  | 0.99  | 0.45  | 1.11  | 0.74  |
| 108261759 | LOC108261759 | 1.57  | 1.00  | 0.52  | 0.25  | 0.41  |
| 108261792 | LOC108261792 | -0.14 | -0.03 | 1.61  | -1.01 |       |
| 108261796 | LOC108261796 | -0.72 | -0.96 | -1.46 | -0.87 | -0.98 |
| 108255449 | dse          | 1.17  | 0.62  | 0.31  | -0.40 | 0.21  |
| 108261852 | LOC108261852 | -2.08 | -1.16 | -0.34 | -1.03 | 0.13  |
| 108261895 | LOC108261895 | -1.72 | -0.24 | 0.47  | 0.00  | 1.15  |
| 108261912 | LOC108261912 | -1.21 | -0.27 | -0.37 | -0.90 | -0.60 |
| 108261923 | LOC108261923 | -1.28 | -0.65 | -0.05 | -0.37 | -0.67 |

|           |              |       |       |       |       |       |
|-----------|--------------|-------|-------|-------|-------|-------|
| 108261929 | LOC108261929 | 3.10  | 2.21  | 0.69  | 1.03  | 0.58  |
| 108261967 | LOC108261967 | -0.69 | -0.40 | 0.12  | -1.33 | -0.98 |
| 108261976 | LOC108261976 | 0.74  | 0.91  | 1.27  | 0.29  | 0.64  |
| 108262004 | LOC108262004 | -1.22 | -0.81 | -0.78 | -0.73 | -0.55 |
| 108262038 | LOC108262038 | -1.42 | -0.95 | -0.03 | -0.67 | -0.79 |
| 108262877 | arhgef38     | -1.46 | -0.85 | -0.45 | -0.48 | 0.00  |
| 108262045 | LOC108262045 | 2.88  | 1.56  | 0.69  | 1.66  | 0.77  |
| 108262049 | LOC108262049 | -0.74 | -0.03 | -0.12 | -1.04 | -0.36 |
| 108262091 | LOC108262091 | -1.05 | -0.60 | -0.17 | -0.44 | -0.49 |
| 108262110 | LOC108262110 | -1.19 | -0.94 | 0.05  | -0.11 | -0.40 |
| 108262159 | LOC108262159 | -1.18 | -0.05 | -0.84 | -0.87 | -0.77 |
| 108262202 | LOC108262202 | 1.40  | -0.82 | 0.30  | 0.46  | 0.50  |
| 108263807 | LOC108263807 | 1.24  | 0.58  | 0.47  | 0.56  | 0.56  |
| 108262315 | LOC108262315 | -1.01 | -0.67 | -0.10 | -0.34 | -0.38 |
| 108272890 | LOC108272890 | 0.99  | 1.00  | 1.03  | 0.88  | 0.61  |
| 108262343 | LOC108262343 | -0.03 | -0.49 | 1.87  | 1.20  | 0.56  |
| 108262355 | LOC108262355 | 0.78  | 0.77  | 1.14  | 0.96  | 0.50  |
| 108262360 | LOC108262360 | 0.75  | 0.65  | 0.90  | 0.87  | 1.07  |
| 108263794 | LOC108263794 | -0.21 | -0.42 | -1.08 | -0.98 | -0.22 |
| 108263783 | LOC108263783 | 1.03  | 0.45  | 0.17  | 0.27  | 0.37  |
| 108262418 | LOC108262418 | -0.59 | -0.42 | -1.14 | -0.78 | -0.86 |
| 108262544 | LOC108262544 | -1.02 | -0.48 | -0.34 | 0.58  | -0.01 |
| 108263714 | LOC108263714 | 1.43  | 0.59  | 0.36  | 0.55  | 0.53  |
| 108262646 | LOC108262646 | 0.75  | -0.49 | 0.19  | 1.14  | 0.91  |
| 108263825 | vegfc        | -0.89 | -0.73 | -0.81 | -1.38 | -0.39 |
| 108263630 | tapbp        | 0.87  | 0.56  | 0.71  | 1.08  | 0.72  |
| 804883    | ND2          | -1.08 | -0.69 | -0.59 | -0.76 | -0.83 |
| 804875    | COX2         | -1.06 | -0.69 | -0.69 | -0.91 | -0.85 |
| 804876    | ATP8         | -0.37 | -0.60 | -0.92 | -0.96 | -1.02 |
| 804881    | ND4L         | -0.93 | -0.76 | -0.79 | -1.01 | -0.76 |
| 804879    | ND5          | -1.05 | -0.67 | -0.67 | -0.82 | -0.59 |
| 108263019 | LOC108263019 | 1.43  | 0.47  | -0.18 | 0.51  | -0.16 |
| 108262696 | lsm6         | 1.20  | 0.66  | 0.11  | 0.48  | 0.28  |
| 108263552 | znf827       | -1.11 | -0.71 | -0.42 | -0.63 | -0.59 |
| 108267831 | LOC108267831 | -1.16 | -0.44 | -0.42 | -0.59 | -0.83 |
| 108262828 | LOC108262828 | -0.23 | -0.20 | -0.22 | -1.06 | -0.63 |
| 108263484 | LOC108263484 | -0.41 | 0.16  | 1.17  | 1.64  | 2.72  |
| 108263487 | LOC108263487 | -1.34 | -0.74 | -0.09 | -0.57 | -0.40 |
| 108263070 | LOC108263070 | -0.88 | -0.50 | -0.33 | -0.89 | -1.38 |
| 100529038 | fbxo32       | 0.34  | 0.72  | 0.83  | 1.02  | 0.94  |
| 108262956 | papss1       | 1.11  | 0.85  | 0.41  | 0.66  | 0.52  |
| 108262961 | mcub         | 1.15  | 0.74  | 0.42  | 0.56  | 0.50  |
| 108263505 | LOC108263505 | -0.31 | -0.52 | -0.51 | -0.79 | -1.34 |
| 108263504 | LOC108263504 | 0.44  | -0.15 | -0.06 | -0.31 | -1.18 |
| 108263509 | LOC108263509 | 1.28  | 0.72  | 0.05  | -0.35 | -1.76 |

|           |              |       |       |       |       |       |
|-----------|--------------|-------|-------|-------|-------|-------|
| 108263851 | LOC108263851 | 1.15  | 0.14  | -0.26 | 0.19  | 0.41  |
| 108263841 | LOC108263841 | 2.15  | 0.41  | 0.07  | 0.45  | 0.72  |
| 108263656 | lrpap1       | 1.28  | 0.49  | 0.24  | 0.55  | 0.27  |
| 100305014 | LOC100305014 | -0.72 | 0.69  | 0.71  | 0.23  | 1.06  |
| 108262383 | LOC108262383 | -0.73 | -0.51 | -0.92 | -0.80 | -1.39 |
| 108262793 | LOC108262793 | -1.20 | -0.05 | 0.00  | 0.30  | 0.43  |
| 108262792 | LOC108262792 | -1.16 | -0.36 | -0.43 | -0.62 | -0.68 |
| 108263410 | pgbd5        | 0.56  | 0.44  | 0.46  | 1.07  | 1.56  |
| 108263112 | sncg         | 1.61  | 0.57  | -0.33 | 0.28  | 0.13  |
| 100528422 | chchd1       | 1.30  | 0.45  | 0.61  | 0.52  | 0.57  |
| 108263386 | kmo          | -1.08 | -0.77 | 0.23  | -0.36 | -0.53 |
| 108262199 | cdc42ep3     | 1.68  | 0.93  | 0.30  | 0.26  | 0.36  |
| 108265295 | LOC108265295 | 1.04  | 0.71  | 0.99  | 0.72  | 0.78  |
| 108263522 | LOC108263522 | -1.30 | -0.64 | -0.39 | -0.22 | -0.23 |
| 108265289 | LOC108265289 | 1.05  | 0.65  | 0.87  | 0.92  | 0.40  |
| 108263288 | LOC108263288 | 1.00  | 0.43  | 0.31  | 0.77  | 0.64  |
| 108262897 | LOC108262897 | -0.35 | 0.46  | -0.94 | -0.21 | 1.11  |
| 100305002 | LOC100305002 | -1.05 | -0.72 | 0.06  | 0.58  | 0.04  |
| 108263643 | LOC108263643 | -0.84 | -0.65 | -0.45 | -1.00 | -0.98 |
| 108263572 | LOC108263572 | 1.21  | 0.57  | 0.20  | 0.72  | 0.60  |
| 108263571 | tbp          | 1.50  | 0.95  | 0.78  | 0.99  | 0.77  |
| 108263345 | LOC108263345 | 1.00  | 0.54  | 0.29  | 0.45  | 0.49  |
| 108262721 | cfap43       | -0.49 | -0.64 | -0.74 | -1.08 | -0.64 |
| 108263226 | LOC108263226 | 1.24  | 0.26  | -0.19 | -0.19 | -0.06 |
| 108262743 | plau         | -1.04 | -0.62 | -0.05 | -0.42 | -0.45 |
| 108263123 | LOC108263123 | -1.02 | -0.98 | -0.92 | -0.75 | -0.51 |
| 108263119 | LOC108263119 | -0.69 | -0.74 | -1.09 | -0.45 | 0.15  |
| 108262651 | ret          | -0.40 | 0.23  | -0.19 | 0.37  | 1.40  |
| 108263681 | rel          | -1.39 | -0.59 | -0.60 | -0.47 | -0.09 |
| 108263604 | vrk2         | -0.85 | -0.53 | -0.29 | -0.59 | -1.08 |
| 108262741 | LOC108262741 | -1.89 | -0.85 | 0.26  | -0.33 | -0.79 |
| 108271012 | LOC108271012 | -0.64 | 1.13  | -0.59 | -0.29 | 0.60  |
| 108263730 | mb21d1       | -1.34 | -0.71 | -0.07 | -0.42 | -0.50 |
| 108265441 | LOC108265441 | 1.18  | 0.79  | 0.34  | 0.33  | 0.58  |
| 108271509 | LOC108271509 | 1.07  | 0.74  | 0.78  | 0.11  | -0.26 |
| 100304654 | hif1an       | 1.12  | 0.90  | 0.12  | 0.50  | -0.11 |
| 108263594 | scd          | 1.25  | 0.98  | 0.74  | 0.83  | 0.73  |
| 100304642 | excl12       | 1.53  | 0.23  | -0.05 | 0.57  | 0.31  |
| 108262862 | drgx         | -0.36 | 0.03  | 0.31  | 0.52  | 1.58  |
| 100528110 | pgam1        | 1.69  | 0.76  | 0.31  | 0.57  | 0.56  |
| 108263273 | marveld1     | 1.23  | 0.31  | 0.08  | 0.31  | -0.20 |
| 108263833 | LOC108263833 | 0.28  | -0.11 | -0.36 | 1.00  | 1.44  |
| 108263305 | LOC108263305 | -0.84 | -0.45 | -0.28 | -1.01 | -0.78 |
| 108263055 | pitx3        | 1.26  | 0.88  | 0.31  | 0.64  | 0.29  |
| 108263219 | LOC108263219 | -1.42 | -0.83 | -0.09 | 0.25  | -0.24 |

|           |              |       |       |       |       |       |
|-----------|--------------|-------|-------|-------|-------|-------|
| 100528181 | kcrb         | 1.23  | 0.15  | 0.08  | 0.55  | 0.18  |
| 108263202 | apopt1       | 1.32  | 0.35  | 0.42  | 0.50  | 0.44  |
| 108263159 | LOC108263159 | -1.19 | -0.19 | 0.02  | 0.19  | 0.57  |
| 108262845 | LOC108262845 | 1.03  | 0.76  | 0.23  | -0.07 | 0.34  |
| 108263740 | LOC108263740 | -0.27 | -0.14 | 0.31  | 0.19  | 1.08  |
| 108263829 | slc25a16     | 1.07  | 0.95  | 0.52  | 0.81  | 0.60  |
| 108263519 | LOC108263519 | 1.05  | 0.66  | 0.44  | 0.65  | 0.60  |
| 108263749 | lzts2        | 1.04  | 0.02  | -0.39 | 0.06  | 0.24  |
| 108263464 | rpia         | 1.31  | 0.95  | 0.41  | 0.87  | 0.66  |
| 100862744 | LOC100862744 | 0.39  | 0.56  | 0.90  | 1.10  | 0.44  |
| 108263682 | scgn         | -0.70 | -0.22 | 0.17  | 0.47  | 1.53  |
| 108263535 | zbtb18       | 2.05  | 1.62  | 1.09  | 2.12  | 1.62  |
| 108263416 | akt3         | -0.96 | -0.82 | -0.63 | -1.05 | -0.72 |
| 108263277 | mcf2         | 1.07  | 0.36  | 0.33  | 0.93  | 0.40  |
| 108263274 | ttc7a        | -1.07 | -0.89 | -0.60 | -0.78 | -0.70 |
| 108262143 | LOC108262143 | 0.42  | 1.08  | 0.69  | 0.24  | 0.48  |
| 108263151 | herc4        | -1.06 | -0.74 | -0.57 | -0.80 | -0.74 |
| 108263832 | LOC108263832 | 1.26  | 0.79  | 0.63  | 0.61  | 0.74  |
| 108263596 | LOC108263596 | 0.06  | 0.32  | 0.27  | 0.76  | 1.48  |
| 108263224 | ppp3r1       | 1.33  | 0.99  | 0.74  | 0.59  | 0.64  |
| 108265573 | LOC108265573 | 1.08  | 0.89  | -0.14 | -0.26 | -0.31 |
| 108265578 | LOC108265578 | 0.06  | 0.13  | -0.19 | -0.50 | -1.14 |
| 108263266 | cdh23        | -1.20 | -0.62 | -0.59 | -0.70 | 0.28  |
| 108263265 | c3h10orf54   | -0.13 | 0.23  | 0.38  | 0.82  | 1.33  |
| 108263437 | LOC108263437 | 2.37  | 0.95  | 0.92  | 0.87  | 1.27  |
| 100528348 | s10a1        | 1.03  | 0.70  | 0.41  | -0.15 | 0.09  |
| 108263213 | eif2ak2      | -0.52 | -0.62 | -0.18 | -0.72 | -1.10 |
| 108263214 | LOC108263214 | 1.06  | 0.39  | -0.08 | 0.03  | 0.28  |
| 108263247 | snpc1        | -0.49 | -0.67 | -0.43 | -0.67 | -1.19 |
| 108263248 | LOC108263248 | -0.33 | -0.48 | -0.47 | -0.75 | -1.08 |
| 108269829 | LOC108269829 | 0.72  | 1.05  | 0.45  | 0.40  | 0.21  |
| 108263063 | LOC108263063 | -0.74 | -0.70 | -0.40 | -1.34 | -0.91 |
| 108262989 | oip5         | 1.37  | 0.21  | -0.19 | 0.65  | -0.17 |
| 108263857 | wdr35        | 1.39  | 1.67  | 1.97  | 1.68  | 1.85  |
| 108265768 | LOC108265768 | -2.30 | 0.22  | 0.45  | 0.25  | 0.96  |
| 108263088 | ppm1a        | 1.04  | 0.89  | 0.65  | 0.97  | 0.65  |
| 108263078 | LOC108263078 | -0.79 | 1.09  | -0.01 | 0.40  | 0.49  |
| 108265685 | LOC108265685 | -0.56 | -0.53 | 0.13  | 0.48  | 1.07  |
| 108262999 | cnih1        | 1.02  | 0.22  | -0.12 | 0.28  | 0.44  |
| 100528501 | tspan14      | 1.26  | 0.88  | 0.62  | 0.84  | 0.77  |
| 108263234 | LOC108263234 | -0.47 | -0.69 | -0.33 | -0.22 | -1.26 |
| 100528999 | arf5         | 1.10  | 0.59  | 0.27  | 0.72  | 0.63  |
| 108265679 | LOC108265679 | 0.41  | -0.57 | 0.75  | 0.48  | 1.38  |
| 108264049 | vwf          | 1.42  | 0.71  | 0.43  | 0.84  | 0.36  |
| 108265673 | LOC108265673 | 1.10  | -0.50 | 0.07  | -0.31 | -0.16 |

|           |              |       |       |       |       |       |
|-----------|--------------|-------|-------|-------|-------|-------|
| 108265809 | LOC108265809 | -0.99 | -0.13 | -1.06 | -0.75 | -0.11 |
| 100528330 | taldo1       | 1.23  | 0.79  | 0.53  | 0.77  | 0.80  |
| 108264637 | LOC108264637 | 0.84  | 0.75  | 0.81  | 1.05  | 0.62  |
| 108264808 | maf          | -1.37 | -0.82 | -0.74 | -0.36 | -0.48 |
| 108264236 | cdyl2        | -1.15 | -0.88 | -0.41 | -0.49 | -0.63 |
| 108264578 | dbnidd1      | -0.20 | -0.36 | -1.43 | -0.87 | 0.21  |
| 100528677 | pdcd5        | 1.01  | 0.80  | 0.39  | 0.44  | 0.50  |
| 108264544 | nip7         | 1.45  | 0.59  | 0.44  | 0.67  | 0.89  |
| 108265907 | LOC108265907 | 1.21  | 0.74  | 0.16  | -0.17 | 0.10  |
| 108264563 | fkbp4        | 1.39  | 0.74  | 0.60  | 0.67  | 0.60  |
| 100528487 | dhdh         | 1.11  | 0.95  | 0.80  | 0.73  | 0.55  |
| 108264676 | nptn         | -1.06 | -0.37 | -0.26 | -0.63 | -0.44 |
| 108263973 | LOC108263973 | -1.41 | -0.62 | -0.39 | -0.24 | 0.07  |
| 108264764 | cd276        | 0.95  | 0.51  | 0.38  | 0.79  | 1.03  |
| 108264774 | LOC108264774 | 1.41  | 0.18  | -0.86 | -0.03 | 0.19  |
| 108264656 | LOC108264656 | 1.01  | 0.66  | 0.87  | 0.55  | 0.43  |
| 108264860 | LOC108264860 | 1.09  | 0.07  | 0.00  | 0.25  | -0.35 |
| 108264291 | LOC108264291 | -1.04 | -0.60 | -0.45 | -0.10 | 0.15  |
| 108265990 | atp8b2       | -1.45 | -0.49 | -0.29 | 0.03  | -0.15 |
| 108264627 | LOC108264627 | -0.50 | -0.71 | -0.70 | -0.65 | -1.64 |
| 108264403 | LOC108264403 | -0.68 | -0.80 | -0.53 | -0.53 | -1.07 |
| 108264535 | LOC108264535 | 1.32  | 0.64  | 0.47  | 0.87  | 0.63  |
| 108264276 | wfdc1        | 2.10  | 1.51  | 1.06  | 1.00  | 1.37  |
| 108264272 | LOC108264272 | -1.21 | -0.50 | -0.21 | -0.70 | -0.57 |
| 108270481 | LOC108270481 | -1.29 | -0.52 | -0.57 | -0.58 | 0.25  |
| 108264695 | tmem263      | 1.04  | 0.59  | 0.65  | 0.67  | 0.71  |
| 108266136 | trim39       | 0.44  | 0.51  | 0.73  | 1.01  | 0.72  |
| 108263979 | il17c        | -1.37 | -0.73 | 0.28  | 0.04  | 0.01  |
| 108264385 | kiaa0513     | 0.86  | 0.93  | 0.83  | 1.17  | 0.94  |
| 100304478 | LOC100304478 | 1.18  | 0.80  | 0.30  | 0.18  | 0.88  |
| 100304519 | rpl4         | 1.03  | 0.79  | 0.89  | 0.70  | 0.70  |
| 108264419 | anpep        | 2.02  | 0.70  | 0.19  | 0.31  | 0.54  |
| 108264433 | chka         | -0.91 | -0.49 | -0.55 | -1.09 | -0.75 |
| 108264037 | LOC108264037 | -0.45 | -0.30 | 0.41  | 0.31  | -1.14 |
| 108264262 | sec11a       | 1.08  | 0.32  | -0.01 | 0.39  | 0.11  |
| 108263894 | LOC108263894 | 1.21  | 0.60  | 1.75  | 1.42  | 1.42  |
| 108264014 | cxcr5        | -1.17 | -0.77 | 0.25  | -0.05 | 0.00  |
| 108266346 | LOC108266346 | -0.46 | -1.14 | -0.72 | -0.63 | -0.31 |
| 108264342 | LOC108264342 | 0.35  | 0.64  | 1.06  | 0.94  | 0.56  |
| 108264346 | LOC108264346 | -0.08 | 0.80  | 1.44  | -0.79 | -0.08 |
| 100304591 | pou2f2       | -1.25 | -0.65 | -0.28 | -0.01 | 0.05  |
| 108263935 | necab2       | 0.06  | 0.62  | 0.82  | 2.00  | 3.57  |
| 108264547 | nutf2        | 1.18  | 0.62  | 0.23  | 0.44  | 0.67  |
| 108264730 | carmil2      | -1.32 | -0.71 | -0.24 | -0.36 | -0.49 |
| 108264368 | LOC108264368 | 0.21  | 0.03  | 1.02  | 1.61  | 1.08  |

|           |              |       |       |       |       |       |
|-----------|--------------|-------|-------|-------|-------|-------|
| 108264367 | LOC108264367 | -1.22 | -0.68 | -0.47 | -0.24 | -0.36 |
| 108264227 | LOC108264227 | -1.18 | -1.51 | -0.80 | -0.21 | -0.47 |
| 108264229 | cotl1        | 1.30  | 0.63  | 0.31  | 0.47  | 0.56  |
| 108264222 | plcg2        | -0.69 | -0.17 | 0.23  | 0.48  | 1.00  |
| 108264447 | chkb         | 0.23  | 0.37  | 0.41  | 0.48  | 1.02  |
| 108264450 | LOC108264450 | -0.96 | -0.74 | -0.18 | 1.16  | 0.62  |
| 108264823 | LOC108264823 | -1.17 | -0.81 | -0.70 | -0.87 | -0.57 |
| 108266541 | LOC108266541 | 1.04  | 0.71  | 0.42  | 0.30  | 0.31  |
| 108264848 | LOC108264848 | 0.44  | 0.92  | 0.32  | 0.35  | 1.13  |
| 108263918 | thsd4        | 0.21  | 0.14  | 0.86  | 0.22  | 1.11  |
| 108264324 | lrrc49       | -1.10 | -0.70 | -0.45 | -0.57 | -0.73 |
| 108264327 | tarsl2       | 0.48  | 0.15  | 0.63  | 1.24  | 0.68  |
| 108264779 | c4h3orf33    | -0.88 | -0.36 | -0.12 | -0.67 | -1.01 |
| 108264391 | LOC108264391 | 0.08  | -0.36 | -0.32 | -0.74 | -1.67 |
| 108264044 | LOC108264044 | 0.67  | 0.82  | 0.98  | 1.43  | 0.74  |
| 108264488 | LOC108264488 | -1.47 | -0.80 | -0.62 | -0.92 | -0.74 |
| 108264499 | LOC108264499 | 1.08  | 0.87  | 0.58  | 0.22  | 0.30  |
| 108264528 | scg3         | -0.18 | -0.26 | -0.73 | -0.07 | 1.62  |
| 108264529 | acadl        | 1.11  | 0.78  | 0.60  | -0.02 | 0.40  |
| 108264530 | tnfaip8l3    | -0.03 | 0.05  | -0.14 | 0.53  | 1.16  |
| 108264283 | fbn1         | 1.43  | 0.27  | 0.01  | 0.25  | 0.18  |
| 108264905 | LOC108264905 | 0.79  | 0.97  | 0.94  | 1.33  | 0.48  |
| 108266696 | LOC108266696 | 1.37  | 0.92  | 0.73  | 0.48  | 0.52  |
| 108264936 | LOC108264936 | -1.18 | -0.57 | -0.52 | -0.11 | -0.31 |
| 108264935 | gpx8         | 1.12  | 0.58  | 0.30  | 0.16  | 0.05  |
| 108264900 | LOC108264900 | -1.30 | -0.68 | 0.13  | 0.36  | 0.34  |
| 108264903 | LOC108264903 | -1.53 | -0.74 | -0.35 | -0.39 | -0.38 |
| 108264907 | LOC108264907 | -0.08 | 0.14  | 0.37  | 0.83  | 1.57  |
| 108266716 | LOC108266716 | -1.74 | -1.24 | -0.65 | -0.61 | -0.81 |
| 108264924 | LOC108264924 | -1.12 | -0.80 | -0.61 | 0.46  | 0.40  |
| 108264908 | LOC108264908 | -0.80 | -0.50 | -0.25 | -0.72 | -1.19 |
| 108266663 | LOC108266663 | -0.31 | -0.73 | -2.01 | -1.74 | -0.81 |
| 108271595 | LOC108271595 | -1.05 | -0.61 | 0.20  | 0.79  | 0.32  |
| 108265443 | LOC108265443 | -1.17 | 0.25  | 0.55  | 0.77  | 0.46  |
| 108265471 | LOC108265471 | -1.10 | -0.78 | -0.68 | -0.43 | -0.26 |
| 108265413 | LOC108265413 | -0.63 | -0.20 | -1.64 | -0.96 | 0.09  |
| 108265928 | LOC108265928 | -0.96 | 1.32  | -0.45 | 0.25  | 0.82  |
| 108264887 | LOC108264887 | -0.44 | -0.76 | -0.02 | -0.96 | -1.12 |
| 108265856 | LOC108265856 | -0.45 | -0.57 | -0.28 | -1.70 | -1.04 |
| 108265605 | LOC108265605 | -1.11 | -0.74 | -0.75 | -0.79 | -0.18 |
| 108264878 | LOC108264878 | -1.16 | -0.97 | -0.61 | -0.76 | -0.04 |
| 108265875 | slc18a1      | -0.72 | -0.02 | 0.25  | 0.76  | 1.64  |
| 108265894 | LOC108265894 | 1.45  | 0.80  | 0.11  | 0.87  | 0.52  |
| 108266789 | LOC108266789 | 2.12  | 0.87  | 0.37  | 0.93  | 0.83  |
| 108265380 | LOC108265380 | -0.91 | -0.83 | -0.74 | -1.07 | -0.91 |

|           |              |       |       |       |       |       |
|-----------|--------------|-------|-------|-------|-------|-------|
| 108265400 | LOC108265400 | -1.03 | -0.69 | -0.73 | -0.85 | -0.88 |
| 100528324 | fkblb        | 1.28  | 0.88  | 0.44  | 0.49  | 0.74  |
| 108265012 | rmi1         | 1.32  | 0.29  | 0.28  | 0.55  | 0.53  |
| 108265332 | adamts13     | -0.80 | 0.47  | 1.02  | 0.32  | 0.04  |
| 108265339 | LOC108265339 | -1.06 | -0.35 | 0.11  | -0.81 | -0.83 |
| 108265088 | LOC108265088 | -0.04 | -0.59 | -0.55 | -0.94 | -1.40 |
| 108265545 | LOC108265545 | -0.26 | -0.76 | -1.04 | -0.82 | -0.04 |
| 108265754 | LOC108265754 | -1.01 | -0.57 | -0.33 | -0.56 | -0.52 |
| 108265406 | LOC108265406 | 1.16  | 0.50  | 0.07  | 0.07  | 0.05  |
| 100528982 | dyl1         | 1.59  | 0.83  | 0.06  | 0.23  | 0.46  |
| 108265024 | tp73         | 1.08  | 0.84  | 0.52  | 0.15  | -0.23 |
| 108265038 | pex10        | -0.74 | -0.62 | -0.43 | -0.69 | -1.03 |
| 108265061 | ndufa7       | 1.04  | 0.17  | -0.09 | 0.22  | -0.25 |
| 108265045 | LOC108265045 | 0.13  | -0.49 | -1.14 | -0.38 | -0.02 |
| 108265057 | LOC108265057 | 0.28  | 1.36  | 0.83  | 0.11  | 2.04  |
| 100528310 | ppih         | 1.22  | 0.80  | 0.14  | 0.52  | 0.58  |
| 108265466 | ogg1         | -1.14 | -0.88 | -0.69 | -0.89 | -0.70 |
| 108265468 | prrt3        | 0.74  | 0.29  | 0.25  | 1.09  | 0.38  |
| 108265623 | LOC108265623 | -0.42 | 0.14  | 0.48  | 0.32  | 1.20  |
| 108265547 | b3galt4      | 1.22  | 0.72  | 0.69  | 0.91  | 0.64  |
| 108265948 | creld1       | 1.33  | 0.89  | 0.29  | 1.18  | 0.31  |
| 108265758 | LOC108265758 | -1.20 | -0.81 | -0.38 | -0.67 | -0.73 |
| 108265840 | il17rb       | -0.61 | -0.61 | -0.32 | 0.69  | 1.68  |
| 108265233 | ralgps1      | -1.11 | -0.60 | -0.20 | -0.51 | -0.63 |
| 108265249 | LOC108265249 | 1.00  | 0.56  | -0.17 | 0.12  | -0.07 |
| 108266943 | cdc42ep5     | 1.05  | 0.93  | 0.60  | 0.86  | 0.81  |
| 108265828 | LOC108265828 | -0.79 | -0.07 | 0.63  | 1.00  | 2.07  |
| 108265756 | srrd         | 1.59  | 0.93  | 0.90  | 0.91  | 0.69  |
| 108265000 | cdc45        | -0.22 | -0.51 | -1.10 | -0.76 | -0.88 |
| 108265807 | LOC108265807 | 1.28  | 0.95  | 0.77  | 0.49  | 0.64  |
| 108270463 | LOC108270463 | -1.34 | -0.85 | -0.30 | -0.49 | -0.81 |
| 108267029 | ash1l        | 0.94  | 0.89  | 1.05  | 0.93  | 0.70  |
| 108265803 | sema6a       | -1.08 | -0.56 | -0.21 | -0.54 | -0.40 |
| 108265111 | atoh1        | 1.05  | 1.80  | 0.79  | 2.39  | 3.23  |
| 108265424 | slc20a2      | 1.28  | 0.76  | 0.13  | 0.59  | 0.09  |
| 108265005 | LOC108265005 | -0.31 | 0.11  | -0.01 | 0.44  | 1.47  |
| 108272314 | LOC108272314 | 1.50  | 0.96  | 0.20  | 0.18  | 0.25  |
| 108277915 | LOC108277915 | 1.60  | 0.87  | 0.60  | 0.13  | -0.05 |
| 108265009 | c5h1orf194   | 0.58  | 0.15  | 1.84  | 0.47  | 0.21  |
| 100528464 | dsccl        | 1.08  | 0.07  | -0.63 | -0.12 | 0.02  |
| 108265919 | pdpn         | 2.15  | 0.61  | 0.60  | 0.76  | 0.97  |
| 100528367 | mgn          | 1.30  | 0.45  | 0.36  | 0.46  | 0.19  |
| 108267132 | sntb1        | 1.06  | 0.50  | 0.29  | 0.42  | 0.56  |
| 108265655 | LOC108265655 | -0.35 | -0.01 | -0.06 | 0.20  | 1.12  |
| 108265656 | LOC108265656 | -0.11 | 0.87  | 0.63  | 1.09  | 0.89  |

|           |              |       |       |       |       |       |
|-----------|--------------|-------|-------|-------|-------|-------|
| 108265502 | tmem81       | -1.45 | -0.71 | -0.13 | -0.58 | -0.11 |
| 108265950 | LOC108265950 | -0.26 | -0.04 | 0.41  | 0.69  | 1.00  |
| 108265980 | LOC108265980 | -0.48 | -0.98 | -0.21 | -0.03 | 1.34  |
| 108267169 | LOC108267169 | 1.20  | 0.88  | 0.58  | 0.63  | 0.77  |
| 100528682 | atp5f1       | 1.24  | 0.61  | 0.24  | 0.40  | 0.39  |
| 108265745 | LOC108265745 | 1.50  | 0.86  | 0.07  | 0.06  | 0.11  |
| 108265813 | LOC108265813 | 1.05  | 0.69  | 0.39  | 0.27  | -0.01 |
| 100528839 | ub2v1        | 1.06  | 0.38  | 0.30  | 0.47  | 0.50  |
| 108265844 | LOC108265844 | -1.08 | -0.31 | -0.36 | -0.27 | -0.36 |
| 108265926 | LOC108265926 | 1.34  | 1.03  | 0.70  | 0.60  | 0.46  |
| 108265269 | c5h1orf174   | 1.59  | 0.71  | 0.93  | 0.99  | 0.74  |
| 108265272 | lrrc47       | 1.26  | 0.91  | 0.43  | 0.67  | 0.41  |
| 108265273 | LOC108265273 | -1.11 | -0.85 | -0.24 | -0.59 | -0.46 |
| 108265775 | LOC108265775 | 1.64  | 0.80  | 0.08  | 0.95  | 0.81  |
| 108265521 | LOC108265521 | -1.82 | -2.08 | -1.17 | -3.17 | -1.43 |
| 108265370 | cenph        | 1.30  | 0.75  | 0.10  | 0.20  | 0.44  |
| 108265611 | c5h9orf116   | -1.25 | -0.72 | -0.58 | -0.56 | -0.58 |
| 108265982 | phf19        | 1.07  | 0.54  | 0.76  | 0.70  | 0.72  |
| 108265446 | LOC108265446 | -2.56 | -1.00 | 0.19  | -0.58 | -0.74 |
| 108265450 | LOC108265450 | -1.31 | -0.76 | -0.23 | 0.34  | -0.19 |
| 108265998 | tbc1d22b     | 0.98  | 0.88  | 0.57  | 1.01  | 0.74  |
| 108265314 | tsr2         | 1.26  | 0.36  | 0.62  | 0.93  | 0.74  |
| 108265917 | LOC108265917 | -1.22 | -0.32 | -0.04 | -0.26 | 0.07  |
| 108265918 | LOC108265918 | -2.13 | -1.84 | -0.62 | -1.55 | -1.58 |
| 108265653 | cdk20        | 0.04  | -0.01 | -0.74 | -1.61 | -1.04 |
| 108264963 | LOC108264963 | -0.63 | -0.52 | 0.11  | 1.23  | 0.45  |
| 108264970 | mfsd12       | -1.35 | -0.48 | -0.04 | -0.67 | -0.26 |
| 108264978 | fzr1         | -0.91 | -0.86 | -1.08 | -0.81 | -0.71 |
| 108264991 | acer1        | -1.30 | -0.82 | -0.30 | -0.58 | -0.80 |
| 108264992 | LOC108264992 | -1.19 | -0.73 | -0.50 | -0.42 | -0.56 |
| 108265853 | LOC108265853 | -1.28 | -0.79 | -0.58 | -0.21 | -0.28 |
| 108265081 | LOC108265081 | -0.03 | 1.07  | -0.45 | 0.28  | 0.72  |
| 108265394 | LOC108265394 | -1.04 | -0.50 | -0.42 | -0.20 | 0.38  |
| 108265599 | rgl1         | -1.30 | -0.91 | -0.88 | -0.85 | -0.49 |
| 108265287 | stap2        | -1.03 | -0.54 | 0.36  | 0.29  | 0.04  |
| 108265201 | LOC108265201 | -1.11 | -0.56 | -0.60 | -0.24 | -0.56 |
| 108256329 | LOC108256329 | 2.03  | 0.47  | -0.19 | 0.37  | 0.50  |
| 108265462 | LOC108265462 | 1.21  | 0.60  | 0.71  | 0.54  | 0.28  |
| 108265463 | LOC108265463 | 1.03  | 0.67  | 0.34  | 0.38  | 0.57  |
| 108267348 | LOC108267348 | -1.46 | -0.84 | -0.19 | 0.26  | 0.24  |
| 108265639 | LOC108265639 | -0.72 | -0.42 | -0.50 | -1.12 | -0.69 |
| 108265078 | LOC108265078 | -0.96 | -0.78 | 0.04  | -0.21 | -1.36 |
| 108265514 | LOC108265514 | -1.18 | -2.14 | -0.98 | 1.01  | 0.22  |
| 108265316 | LOC108265316 | -1.37 | -0.83 | -0.82 | -0.88 | -0.68 |
| 108265354 | LOC108265354 | -1.06 | -0.51 | -0.23 | -0.73 | -0.89 |



|           |              |       |       |       |       |       |
|-----------|--------------|-------|-------|-------|-------|-------|
| 108266324 | tspear       | 0.07  | 0.35  | 0.18  | 0.38  | 1.36  |
| 108266445 | umps         | 1.11  | -0.22 | 0.39  | 0.70  | 0.10  |
| 108267423 | fkbp14       | 1.30  | 0.64  | 0.88  | 0.42  | 0.74  |
| 108266534 | hao2         | -0.02 | 0.03  | -0.98 | -1.39 | -0.90 |
| 108266571 | sap18        | 1.20  | 0.73  | 0.46  | 0.58  | 0.50  |
| 100528888 | eef1akmt1    | 1.18  | 0.60  | 0.20  | 0.77  | 0.47  |
| 108266600 | inpp4a       | -1.15 | -0.54 | -0.15 | -0.20 | 0.03  |
| 108266192 | LOC108266192 | -2.84 | -0.36 | -2.04 | -0.48 | 1.39  |
| 108266759 | slc37a1      | -1.01 | -0.77 | -0.65 | -0.33 | 0.41  |
| 108266979 | LOC108266979 | -0.36 | -1.13 | -0.92 | -0.58 | 0.34  |
| 108266458 | vil1         | -0.65 | -0.08 | -0.05 | 0.59  | 1.93  |
| 108266490 | LOC108266490 | 0.20  | 0.02  | 1.23  | 0.71  | 0.04  |
| 108266937 | LOC108266937 | 1.91  | 1.68  | 2.67  | 2.25  | 2.96  |
| 108266661 | phgdh        | 1.07  | 0.59  | 0.71  | 0.44  | 0.57  |
| 108266769 | LOC108266769 | 1.22  | 0.97  | 0.73  | 0.78  | 0.88  |
| 108266742 | fer1l6       | 0.27  | 0.78  | 0.69  | 0.93  | 1.19  |
| 108266094 | LOC108266094 | -1.19 | -0.43 | -0.35 | 0.06  | 0.22  |
| 108266676 | grb14        | -1.15 | -0.52 | -0.22 | -0.40 | 0.06  |
| 108267021 | gpr1         | 2.24  | 0.63  | 0.70  | 0.85  | 0.83  |
| 100304949 | rbm45        | 1.05  | 0.90  | 0.93  | 0.98  | 0.96  |
| 108266481 | gpr155       | 0.71  | 0.67  | 1.21  | 0.83  | 0.19  |
| 108266114 | cdca7        | 1.11  | 0.07  | -0.36 | 0.00  | -0.32 |
| 108266662 | dcaf17       | -1.16 | -0.60 | -0.33 | -0.85 | -0.48 |
| 108266375 | LOC108266375 | 0.63  | 0.01  | 0.22  | 0.23  | 1.03  |
| 108266512 | LOC108266512 | 2.19  | 1.66  | 2.30  | 2.21  | 2.65  |
| 108266997 | rgcc         | 1.53  | 0.90  | 0.01  | 0.48  | 0.96  |
| 108266996 | ccdc80       | 1.02  | 0.10  | 0.75  | 0.15  | 0.99  |
| 108269355 | LOC108269355 | -1.05 | -0.61 | -0.16 | -0.13 | -0.27 |
| 108269342 | LOC108269342 | 1.10  | 0.61  | 0.30  | 0.69  | 0.60  |
| 108266666 | atp1a1       | 0.40  | -0.50 | -0.50 | -0.62 | -1.02 |
| 108266679 | inhbb        | 1.46  | 0.76  | 0.41  | 0.79  | 0.59  |
| 108266739 | ccny11       | -1.07 | -0.81 | -0.66 | -0.92 | -0.73 |
| 108266818 | idh1         | 1.27  | 0.78  | -0.11 | 0.43  | 0.33  |
| 108266389 | lcmt2        | -0.98 | -1.00 | -0.65 | -0.52 | -0.67 |
| 108266749 | kdelc1       | 1.11  | 0.39  | 0.59  | 0.58  | 0.60  |
| 108266993 | nepro        | 1.35  | 0.90  | 0.47  | 0.71  | 0.22  |
| 108266988 | LOC108266988 | -1.21 | -0.92 | -0.48 | -0.59 | -0.85 |
| 100528289 | ggact        | 1.05  | 0.66  | 0.41  | 0.45  | 0.49  |
| 108266404 | maats1       | -1.21 | -0.92 | -0.30 | 0.10  | 1.25  |
| 108266613 | fstl1        | 2.20  | 0.75  | 0.11  | 0.54  | 0.85  |
| 108266123 | tnfsf13b     | -0.18 | 0.75  | 0.81  | 0.37  | 1.01  |
| 108266298 | col4a1       | 1.58  | 0.69  | 0.13  | 0.50  | 0.66  |
| 108266103 | LOC108266103 | 0.29  | 0.09  | 0.67  | 1.06  | 0.24  |
| 108266236 | LOC108266236 | -0.93 | -0.87 | -0.77 | -0.99 | -1.01 |
| 108266232 | LOC108266232 | -0.32 | 0.11  | 1.04  | 1.61  | 2.38  |

|           |              |       |       |       |       |       |
|-----------|--------------|-------|-------|-------|-------|-------|
| 108266234 | epb4115      | 0.76  | 1.01  | 0.37  | 0.77  | 0.52  |
| 108267680 | cct3         | 1.17  | 0.45  | 0.20  | 0.52  | 0.30  |
| 108266697 | tyw5         | -0.29 | -0.71 | -0.63 | -0.91 | -1.13 |
| 108266787 | c6h21orf62   | 2.13  | 1.64  | 1.63  | 1.10  | 1.33  |
| 108266841 | LOC108266841 | -1.09 | -0.54 | 0.36  | 0.50  | -0.31 |
| 100528504 | itm2b        | 1.52  | 1.00  | 0.75  | 0.85  | 0.59  |
| 108267011 | frzb         | 1.12  | 0.41  | 0.36  | 0.98  | 0.73  |
| 108267736 | LOC108267736 | 1.27  | 0.90  | 0.40  | 0.71  | 0.60  |
| 108266850 | LOC108266850 | 1.88  | 0.64  | 0.07  | 0.14  | -0.42 |
| 108266430 | LOC108266430 | -1.52 | -0.79 | -0.54 | -0.83 | -0.74 |
| 108266560 | LOC108266560 | 1.18  | 0.93  | 0.61  | 0.93  | 0.86  |
| 108266545 | LOC108266545 | 1.02  | 0.87  | 0.12  | 0.66  | 0.83  |
| 108266207 | LOC108266207 | -0.50 | -0.66 | -0.18 | -0.62 | -1.25 |
| 108266558 | LOC108266558 | -0.43 | -0.39 | -0.48 | -1.11 | -0.69 |
| 100304991 | ugt          | 0.61  | 0.51  | 0.21  | 0.79  | 1.18  |
| 108266076 | wnt10a       | 0.09  | 0.27  | 0.32  | -0.24 | -1.14 |
| 108266100 | LOC108266100 | -0.80 | 0.28  | -0.22 | -0.78 | 1.34  |
| 108266354 | cflar        | -1.33 | -0.40 | -0.92 | -0.56 | 0.02  |
| 108266357 | otc          | -0.65 | -0.53 | -0.21 | -0.73 | -1.07 |
| 108266607 | abi3bp       | 1.22  | 0.61  | 0.12  | 0.80  | 0.95  |
| 108266617 | LOC108266617 | 0.09  | 0.40  | 0.53  | 1.03  | 0.94  |
| 100528879 | hspe1        | 1.26  | 0.37  | 0.26  | 0.15  | 0.18  |
| 108266280 | hspd1        | 1.11  | 0.38  | -0.18 | 0.05  | 0.04  |
| 100528529 | gpr18        | -0.34 | -0.37 | 0.11  | 1.06  | 0.30  |
| 108268080 | rhbq         | 2.36  | 0.88  | 1.73  | 1.77  | 1.58  |
| 108266887 | LOC108266887 | -0.32 | -0.43 | 0.19  | 1.18  | 0.81  |
| 108266911 | gpm6b        | 1.87  | 0.39  | -0.08 | 0.40  | 0.35  |
| 108267337 | LOC108267337 | 0.45  | 0.31  | -0.68 | -1.05 | -0.27 |
| 108267350 | LOC108267350 | -0.16 | -0.09 | 0.50  | 0.80  | 1.01  |
| 108267367 | LOC108267367 | -1.36 | -0.56 | 0.60  | -0.55 | 0.84  |
| 108265649 | LOC108265649 | 0.36  | 0.42  | 1.20  | 0.30  | 0.65  |
| 100528801 | mrps14       | 1.01  | 0.47  | 0.49  | 0.26  | 0.36  |
| 108267383 | LOC108267383 | 1.20  | 0.98  | 0.75  | 0.83  | 0.81  |
| 108267392 | LOC108267392 | 1.02  | 0.11  | 0.27  | 0.08  | -0.61 |
| 108267396 | LOC108267396 | 0.60  | 0.69  | 0.89  | 1.01  | 0.66  |
| 108267400 | LOC108267400 | -0.76 | 0.64  | 0.14  | 0.71  | 1.33  |
| 108267409 | LOC108267409 | 1.22  | 0.52  | 0.10  | 0.21  | -0.35 |
| 108267144 | LOC108267144 | -1.08 | -0.33 | 0.06  | 0.18  | 0.44  |
| 108267818 | LOC108267818 | 1.17  | 0.34  | -0.29 | -0.12 | 0.18  |
| 108268144 | ctnnd2       | -1.34 | -0.92 | -0.57 | -0.98 | -0.70 |
| 108268181 | tym5         | 1.00  | 0.33  | -0.45 | 0.03  | -0.10 |
| 108268065 | psmb5        | 1.36  | 0.61  | 0.15  | 0.45  | 0.37  |
| 108267708 | LOC108267708 | -1.85 | -1.20 | 0.17  | 1.03  | 0.94  |
| 108267124 | c7h22orf39   | 1.03  | 0.71  | 0.33  | 0.36  | 0.41  |
| 108267123 | LOC108267123 | -0.33 | -0.66 | -0.27 | -0.74 | -1.31 |

|           |              |       |       |       |       |       |
|-----------|--------------|-------|-------|-------|-------|-------|
| 108268340 | LOC108268340 | -1.13 | 0.00  | -0.18 | 0.14  | 0.93  |
| 108268059 | LOC108268059 | -1.04 | 0.17  | -0.81 | -0.84 | -0.29 |
| 108267178 | b3gnt5       | 0.09  | 0.33  | 0.04  | 0.55  | 1.47  |
| 108267997 | LOC108267997 | 0.27  | 1.16  | 0.21  | 0.34  | 0.11  |
| 108268327 | ltbr         | -1.06 | -0.67 | -0.12 | -0.38 | -0.18 |
| 108267660 | LOC108267660 | 2.58  | 1.82  | 0.56  | 1.96  | 1.86  |
| 108263802 | LOC108263802 | 0.05  | -0.02 | 0.63  | 1.07  | 0.54  |
| 108267470 | LOC108267470 | 1.37  | 0.67  | -0.41 | 0.30  | 0.90  |
| 108267643 | LOC108267643 | 0.06  | -1.13 | -0.57 | -0.96 | 0.12  |
| 108267650 | tsen15       | 1.40  | 1.45  | 0.45  | 0.95  | 0.46  |
| 108268279 | ebna1bp2     | 1.23  | 0.63  | 0.38  | 0.48  | 0.46  |
| 108267718 | LOC108267718 | 0.87  | 0.57  | 0.13  | 0.56  | 1.02  |
| 108267190 | LOC108267190 | 0.85  | 0.56  | -0.21 | 0.69  | 1.00  |
| 108267449 | LOC108267449 | 1.22  | 0.96  | 0.91  | 0.93  | 0.96  |
| 108267447 | LOC108267447 | 0.68  | 0.56  | 0.47  | 0.65  | 1.28  |
| 108267455 | pex19        | 1.39  | 0.68  | 0.39  | 0.63  | 0.67  |
| 108267567 | LOC108267567 | -1.06 | -0.59 | -0.41 | -0.45 | -0.33 |
| 108267561 | klhl6        | -1.25 | -0.87 | -0.60 | -0.80 | -0.35 |
| 108267239 | LOC108267239 | -0.20 | -1.10 | -0.42 | 0.32  | -0.28 |
| 100528648 | chmp5        | 1.10  | 0.74  | 0.33  | 0.66  | 0.65  |
| 100528380 | mrpl15       | 1.01  | 0.49  | 0.14  | 0.39  | 0.31  |
| 108267807 | LOC108267807 | -1.19 | -0.84 | -0.34 | -0.89 | -0.36 |
| 108268084 | sdr16c5      | 1.19  | 0.73  | 0.35  | 0.61  | 0.65  |
| 108267574 | sdcbp        | -0.79 | -0.74 | -0.44 | -1.14 | -0.84 |
| 100528709 | mad2l1       | 1.79  | 0.65  | 0.53  | 0.65  | 0.55  |
| 100304508 | nitr2        | -0.82 | -0.85 | -1.29 | -0.44 | -0.03 |
| 108268330 | LOC108268330 | 2.39  | 1.59  | 0.80  | 0.80  | 0.74  |
| 108267165 | LOC108267165 | -0.57 | -0.66 | -0.32 | -1.33 | -0.86 |
| 108267785 | LOC108267785 | -1.11 | -0.55 | -0.42 | -0.53 | -0.65 |
| 108268050 | LOC108268050 | 0.87  | 0.26  | -0.77 | 0.27  | 1.55  |
| 108267761 | ndufs2       | 1.33  | 0.68  | 0.28  | 0.42  | 0.22  |
| 108268085 | LOC108268085 | 1.67  | 0.37  | -0.41 | 0.22  | 0.23  |
| 108267834 | LOC108267834 | 1.08  | 0.43  | -0.15 | 0.13  | 0.27  |
| 108267914 | LOC108267914 | -0.17 | -0.03 | 0.25  | 0.85  | 1.55  |
| 108268203 | cpz          | 1.69  | 0.66  | -0.38 | 0.32  | 0.37  |
| 108268079 | adamts1l     | 0.85  | 1.06  | 0.77  | 0.83  | 0.82  |
| 108267993 | LOC108267993 | -1.51 | 0.86  | -0.29 | 0.17  | 0.44  |
| 108267739 | LOC108267739 | -1.37 | -0.72 | 0.30  | -0.37 | -0.58 |
| 108267241 | LOC108267241 | -1.02 | -0.55 | 0.12  | 0.06  | -0.43 |
| 108267153 | LOC108267153 | 2.47  | 1.57  | 1.01  | 1.37  | 0.72  |
| 108268660 | LOC108268660 | -1.34 | -0.97 | -0.71 | -0.80 | -0.27 |
| 108267594 | LOC108267594 | -0.25 | -0.59 | -0.26 | -0.24 | -1.22 |
| 108267141 | LOC108267141 | 1.41  | 0.84  | 0.70  | 0.07  | 0.10  |
| 108267706 | kdm6b        | -1.10 | -0.75 | -0.54 | -0.83 | -0.66 |
| 108267429 | LOC108267429 | -1.31 | -0.64 | -0.36 | -0.59 | -0.74 |

|           |              |       |       |       |       |       |
|-----------|--------------|-------|-------|-------|-------|-------|
| 100528907 | t185a        | 1.09  | 0.79  | -0.19 | 0.56  | 0.48  |
| 108267428 | cited1       | 1.03  | 0.17  | 0.07  | 0.45  | 0.29  |
| 108268348 | LOC108268348 | -1.01 | 0.68  | -0.75 | -0.48 | 0.12  |
| 100304878 | cct7         | 1.16  | 0.74  | 0.42  | 0.60  | 0.60  |
| 108268202 | LOC108268202 | 1.11  | 0.75  | 0.37  | 0.41  | 0.42  |
| 108267877 | LOC108267877 | 0.80  | 0.52  | 0.76  | 0.93  | 1.08  |
| 108267193 | dthd1        | -0.85 | -0.88 | -0.94 | -0.94 | -1.17 |
| 108270991 | tcaim        | 0.92  | 0.69  | 0.95  | 1.17  | 0.31  |
| 108267493 | LOC108267493 | -1.72 | -0.96 | 0.09  | -0.25 | -0.76 |
| 108268122 | LOC108268122 | 1.80  | 1.77  | 0.88  | 1.06  | 2.00  |
| 108267745 | LOC108267745 | -0.09 | -0.32 | -0.21 | 0.25  | 1.02  |
| 108267748 | LOC108267748 | -0.89 | -0.95 | -0.49 | -1.25 | -1.00 |
| 108268885 | cpq          | 1.08  | 0.61  | 0.56  | 0.54  | 0.26  |
| 108267936 | LOC108267936 | -1.10 | -0.74 | 0.02  | -0.54 | -0.55 |
| 108268943 | LOC108268943 | 1.20  | 0.63  | 0.27  | 0.41  | 0.60  |
| 108267937 | LOC108267937 | -1.38 | -0.47 | -0.22 | -0.53 | -0.38 |
| 108267933 | LOC108267933 | 0.52  | -0.52 | 1.42  | -0.61 | -0.29 |
| 108267959 | LOC108267959 | -0.05 | 0.54  | 0.88  | 0.37  | 1.22  |
| 108267962 | c7h4orf48    | 1.52  | 0.90  | 0.26  | 0.38  | 0.87  |
| 108267972 | mssmp        | -1.36 | -0.93 | -0.59 | -0.28 | -0.74 |
| 108267980 | LOC108267980 | -1.24 | -0.60 | -0.06 | -0.12 | 0.02  |
| 108267985 | LOC108267985 | 0.77  | 0.86  | 0.92  | 1.55  | 0.97  |
| 108268184 | pfdn2        | 1.24  | 0.66  | 0.34  | 0.38  | 0.47  |
| 108267502 | actn3        | -0.73 | -0.83 | -0.75 | -1.02 | -0.45 |
| 108269615 | LOC108269615 | 0.81  | 0.40  | 0.11  | 0.72  | 1.41  |
| 108267286 | LOC108267286 | 1.11  | 0.83  | 0.77  | 0.48  | 0.57  |
| 108267642 | LOC108267642 | -1.01 | -0.46 | 0.02  | -0.34 | -0.37 |
| 108268112 | LOC108268112 | -2.25 | -1.70 | -1.34 | -1.86 | -2.16 |
| 108267312 | LOC108267312 | -0.24 | -0.26 | 0.27  | 0.75  | 1.02  |
| 108267313 | LOC108267313 | -0.11 | 0.52  | 1.01  | 1.55  | 3.69  |
| 108267251 | LOC108267251 | -1.38 | -0.80 | 0.13  | -0.19 | -0.41 |
| 108267869 | LOC108267869 | -0.82 | -0.24 | 0.98  | 1.15  | 0.63  |
| 108268075 | LOC108268075 | 1.02  | 1.00  | 0.96  | 0.90  | -0.02 |
| 108268060 | LOC108268060 | 1.69  | 1.85  | 0.57  | 2.88  | 0.63  |
| 108267211 | LOC108267211 | 0.05  | 0.37  | 1.04  | 1.15  | -0.41 |
| 108276231 | LOC108276231 | -0.18 | -0.26 | -0.85 | -1.26 | -0.72 |
| 108268259 | LOC108268259 | -0.85 | -0.98 | 0.35  | 0.31  | 1.44  |
| 108267254 | LOC108267254 | 0.65  | 0.75  | 1.07  | 0.39  | -0.06 |
| 108268233 | LOC108268233 | -0.57 | -0.94 | -0.45 | -0.74 | -1.32 |
| 108268250 | LOC108268250 | 1.43  | 0.33  | 0.12  | 0.38  | 0.18  |
| 108268217 | LOC108268217 | -1.07 | -0.81 | -0.42 | -0.72 | -0.41 |
| 108269162 | rsu1         | 1.51  | 0.74  | 0.51  | 0.78  | 0.84  |
| 108268238 | LOC108268238 | -1.15 | -0.23 | 0.28  | 0.78  | 0.59  |
| 108268236 | LOC108268236 | -1.07 | -0.54 | -0.11 | 0.01  | -0.72 |
| 108268212 | LOC108268212 | -0.11 | 0.46  | 0.90  | 1.32  | 0.73  |

|           |              |       |       |       |       |       |
|-----------|--------------|-------|-------|-------|-------|-------|
| 108268267 | LOC108268267 | -0.93 | -0.30 | -1.28 | -1.02 | -0.76 |
| 108268234 | LOC108268234 | -1.00 | -0.12 | -0.04 | 0.01  | -0.13 |
| 108271100 | vim          | 1.58  | 0.59  | -0.21 | 0.17  | 0.26  |
| 108268115 | LOC108268115 | 0.60  | 0.86  | 1.05  | 0.17  | 0.00  |
| 108271107 | pdelc        | -1.12 | -0.14 | 0.11  | -0.07 | -0.30 |
| 108267188 | LOC108267188 | 0.35  | 0.35  | 0.11  | -1.48 | -1.00 |
| 108267912 | greb1l       | -1.12 | -0.46 | 0.38  | 0.27  | 0.22  |
| 108267119 | LOC108267119 | -0.38 | -0.11 | 0.16  | 1.06  | 0.67  |
| 108267101 | LOC108267101 | 1.20  | 0.35  | 1.13  | 1.07  | 0.47  |
| 108267255 | LOC108267255 | 1.77  | 0.83  | 0.56  | 0.69  | 0.87  |
| 108267105 | LOC108267105 | 1.24  | 1.08  | 0.57  | 1.06  | 0.61  |
| 108267090 | LOC108267090 | -0.56 | -0.15 | 0.24  | 1.32  | 0.48  |
| 108267091 | LOC108267091 | 2.22  | 0.77  | -0.04 | 0.14  | 0.39  |
| 108267117 | LOC108267117 | 1.68  | -0.10 | -0.68 | 1.33  | 0.66  |
| 108267526 | wnt3a        | 2.44  | 2.02  | 1.20  | 1.35  | 1.09  |
| 108267530 | guk1         | 1.10  | 0.61  | 0.10  | 0.10  | 0.12  |
| 108267260 | ccdc13       | -1.11 | -0.95 | -0.78 | -0.95 | -0.88 |
| 108269086 | LOC108269086 | 1.02  | -0.44 | -0.27 | 0.47  | 1.22  |
| 100528234 | psma1        | 1.04  | 0.45  | 0.16  | 0.45  | 0.19  |
| 108268649 | LOC108268649 | -1.04 | -0.87 | -0.58 | -0.38 | -0.46 |
| 108269044 | map1lc3b     | 0.61  | 0.80  | 0.60  | 0.78  | 1.15  |
| 108269344 | LOC108269344 | -0.89 | -1.82 | -0.51 | 1.78  | 2.06  |
| 108268428 | LOC108268428 | -0.01 | 0.07  | -0.91 | 0.50  | 1.78  |
| 100304606 | canx         | 1.03  | 0.37  | 0.06  | 0.53  | 0.18  |
| 108268579 | mgat4b       | -1.25 | -0.89 | -0.95 | -0.97 | -0.75 |
| 108268477 | LOC108268477 | -1.70 | -1.00 | -0.77 | -0.74 | -0.34 |
| 108268827 | LOC108268827 | 1.36  | 0.79  | 0.32  | 0.32  | 0.32  |
| 100528296 | sh21a        | -1.11 | -0.63 | -0.55 | -0.14 | -0.34 |
| 108269178 | sh3bgrl      | 0.61  | 0.54  | 0.38  | 0.66  | 1.14  |
| 108268918 | LOC108268918 | 1.07  | 0.11  | 0.37  | 0.38  | 0.26  |
| 108268882 | tmsb15b      | 1.17  | 0.91  | 0.40  | 0.05  | 0.27  |
| 108269411 | LOC108269411 | -1.31 | -0.38 | -0.20 | 0.08  | -0.13 |
| 108268901 | fut11        | -0.68 | -0.64 | -0.75 | -1.01 | -0.94 |
| 108268904 | LOC108268904 | -0.51 | -0.78 | -0.84 | -1.13 | -0.95 |
| 108268437 | LOC108268437 | -0.41 | -0.60 | -1.05 | -0.66 | -0.79 |
| 108268674 | flt4         | -0.45 | -0.74 | -1.05 | -0.78 | -0.52 |
| 108268411 | spd11        | 1.14  | 0.87  | 0.05  | 0.18  | 0.31  |
| 108269129 | hspa9        | 1.52  | 0.39  | -0.04 | 0.34  | 0.16  |
| 108269374 | LOC108269374 | 1.11  | 0.84  | 0.25  | 0.26  | 0.40  |
| 100335036 | tspan6       | 1.70  | 0.96  | 0.65  | 0.76  | 0.80  |
| 100528803 | rnaseh2c     | 1.05  | 0.25  | 0.15  | 0.55  | 0.17  |
| 108257214 | LOC108257214 | -1.64 | -1.00 | -0.98 | 0.51  | 0.23  |
| 108269392 | LOC108269392 | -0.36 | 0.13  | 0.61  | 1.42  | 0.60  |
| 108268418 | trmt112      | 1.06  | 0.61  | 0.36  | 0.37  | 0.50  |
| 108269060 | lox13        | 0.46  | 0.40  | 0.76  | 0.71  | 1.10  |

|           |              |       |       |       |       |       |
|-----------|--------------|-------|-------|-------|-------|-------|
| 108268415 | LOC108268415 | 0.86  | 0.64  | 1.25  | 0.65  | 0.04  |
| 108268484 | lhx2         | -0.55 | -0.55 | -0.98 | -1.09 | -0.37 |
| 108269156 | pigg         | 1.20  | 0.68  | 0.61  | 0.64  | 0.54  |
| 108268850 | pdgfrl       | 1.36  | 0.80  | 0.12  | 0.33  | 0.39  |
| 100528369 | pdfn6        | 1.07  | 0.50  | 0.15  | 0.34  | 0.17  |
| 108268396 | LOC108268396 | 1.55  | 0.45  | 0.38  | 0.46  | 0.34  |
| 108269352 | LOC108269352 | 1.11  | 0.39  | 0.53  | 0.70  | 0.43  |
| 100528167 | hprt1        | 1.19  | 0.65  | 0.21  | 0.64  | 0.75  |
| 108268440 | cd40lg       | -1.02 | -0.80 | -0.23 | 0.26  | -0.23 |
| 108269265 | LOC108269265 | -1.12 | -0.22 | 0.27  | -0.39 | -0.15 |
| 100528070 | psmd10       | 1.17  | 0.77  | 0.45  | 0.58  | 0.24  |
| 108268937 | acsl4        | -1.20 | -0.46 | -0.94 | -0.58 | 0.07  |
| 108269144 | sparc        | 0.99  | 0.45  | 0.35  | 0.42  | 1.16  |
| 108269258 | thoc3        | 1.11  | 0.45  | 0.07  | 0.56  | 0.50  |
| 108268818 | LOC108268818 | -1.21 | -0.69 | -0.81 | -0.99 | -0.76 |
| 108263890 | LOC108263890 | 1.28  | 0.51  | 0.18  | 0.64  | 0.74  |
| 108269336 | LOC108269336 | 1.45  | 0.92  | 0.31  | 0.74  | 0.58  |
| 108269645 | LOC108269645 | -1.18 | -0.45 | -0.28 | -0.51 | -0.25 |
| 108269280 | LOC108269280 | -1.26 | -0.36 | -0.43 | -0.60 | -0.80 |
| 108269361 | c8h12orf73   | 1.40  | 0.72  | 0.41  | 0.48  | 0.49  |
| 108269244 | ndrg4        | 1.48  | 0.50  | -0.41 | 0.27  | 0.05  |
| 100528363 | gins3        | 1.40  | 0.37  | 0.66  | 0.59  | 0.30  |
| 108268812 | LOC108268812 | 0.84  | 0.64  | 0.72  | 1.22  | 0.96  |
| 108269230 | csnk2a2      | -1.04 | -0.48 | -0.45 | -0.55 | -0.42 |
| 108268963 | tcp1l1l1     | 1.05  | 0.48  | 0.05  | 0.39  | -0.31 |
| 108269371 | LOC108269371 | 1.48  | 0.65  | -0.13 | 0.09  | 0.28  |
| 108269243 | c8h12orf4    | 1.02  | 0.92  | 0.70  | 0.93  | 0.65  |
| 108268891 | LOC108268891 | -0.08 | 0.59  | 0.25  | 0.82  | 1.37  |
| 108268913 | elmo3        | 0.73  | 0.87  | 1.03  | 0.96  | 0.74  |
| 108269915 | opr1         | 2.68  | 1.10  | 0.66  | 0.81  | 1.35  |
| 108269926 | LOC108269926 | -1.17 | -0.10 | 0.39  | -0.01 | -0.28 |
| 108269000 | LOC108269000 | -1.03 | -0.60 | -0.33 | -0.60 | -0.69 |
| 108269359 | cav2         | 1.11  | 0.31  | 0.06  | 0.18  | 0.32  |
| 108268945 | LOC108268945 | 0.90  | 1.04  | 0.97  | -0.23 | 0.47  |
| 108268460 | LOC108268460 | 0.04  | 0.72  | 1.44  | 0.80  | 0.81  |
| 108269148 | egr1         | -0.37 | 1.01  | -0.02 | 0.15  | 0.24  |
| 108268842 | reep2        | -0.14 | -0.66 | -1.33 | -0.94 | -0.78 |
| 108268708 | tbc1d10c     | -1.03 | -0.62 | -0.26 | -0.36 | -0.31 |
| 108268687 | LOC108268687 | 1.26  | 0.60  | 0.01  | 0.29  | 0.40  |
| 108269184 | LOC108269184 | 0.69  | 1.08  | 0.45  | 0.94  | 0.88  |
| 108269143 | ppid         | 1.13  | 0.28  | 0.10  | 0.19  | 0.37  |
| 108269056 | mgat4d       | 1.02  | 0.82  | 0.66  | 0.88  | 0.61  |
| 108269058 | LOC108269058 | -0.72 | -0.64 | -0.56 | -0.29 | -1.19 |
| 108269057 | LOC108269057 | -0.48 | 0.13  | -0.07 | 0.44  | -1.22 |
| 108269059 | LOC108269059 | -0.67 | -0.62 | -0.59 | -0.46 | -1.12 |

|           |              |       |       |       |       |       |
|-----------|--------------|-------|-------|-------|-------|-------|
| 108268603 | ndufc1       | 1.12  | 0.39  | 0.13  | 0.40  | 0.37  |
| 108268604 | noct         | -1.24 | 0.07  | -0.40 | -0.51 | -0.29 |
| 108268613 | LOC108268613 | -1.01 | -0.38 | -0.26 | -0.48 | -0.46 |
| 100528970 | 4eb3l        | 1.11  | 0.49  | 0.61  | 0.79  | 0.24  |
| 108268739 | LOC108268739 | -1.41 | -0.96 | -0.42 | -0.63 | -0.33 |
| 108268726 | LOC108268726 | -0.74 | -0.74 | 0.04  | 1.53  | 0.74  |
| 100528278 | elovl6       | 1.06  | 0.54  | 0.08  | 0.19  | 0.14  |
| 108268711 | LOC108268711 | -1.01 | -0.43 | -0.41 | -0.69 | -0.76 |
| 108268713 | LOC108268713 | -1.24 | -0.17 | -0.45 | -0.57 | -0.47 |
| 108268927 | LOC108268927 | 0.59  | 0.51  | 0.50  | 0.73  | 1.27  |
| 108268860 | LOC108268860 | 0.54  | 0.51  | 0.49  | 0.87  | 1.02  |
| 108276169 | cenpw        | 1.72  | 0.83  | -0.15 | 0.38  | -0.10 |
| 108270007 | fut9         | -0.83 | -0.46 | 0.07  | 0.53  | 1.15  |
| 108270008 | LOC108270008 | -0.61 | 0.95  | 0.48  | 1.51  | 2.82  |
| 108270005 | LOC108270005 | -0.88 | -0.67 | -0.36 | 0.43  | 1.23  |
| 108269436 | wdhd1        | -0.39 | -0.68 | -1.06 | -0.79 | -0.65 |
| 108269774 | gch1         | -1.69 | -0.95 | -0.51 | 0.33  | -0.18 |
| 108269778 | LOC108269778 | -1.30 | -0.60 | -0.51 | -0.82 | -0.63 |
| 108269781 | amhr2        | -1.35 | -0.53 | -0.61 | -0.90 | -0.96 |
| 108269993 | LOC108269993 | -1.78 | -0.59 | -0.71 | -0.96 | -0.61 |
| 108269718 | LOC108269718 | -1.59 | -0.73 | 0.18  | -0.28 | -0.44 |
| 108269881 | psma6        | 1.08  | 0.41  | 0.25  | 0.59  | 0.15  |
| 108270392 | prox1        | 0.37  | 0.07  | -0.32 | 0.89  | 1.20  |
| 100528197 | cdk1         | 1.16  | 0.48  | -0.07 | 0.35  | 0.25  |
| 108280159 | eny2         | 1.12  | 0.69  | 0.37  | 0.54  | 0.62  |
| 100305109 | eif3e        | 1.11  | 0.89  | 0.90  | 0.71  | 0.69  |
| 108269620 | pld4         | -1.45 | -0.93 | -0.15 | -0.40 | -0.80 |
| 108269611 | plcb2        | -0.56 | -0.82 | -1.08 | -0.65 | -0.10 |
| 108269634 | inafm2       | -0.69 | -1.02 | -1.24 | -0.54 | -0.68 |
| 108269934 | LOC108269934 | 1.28  | 0.76  | 0.04  | -0.09 | 0.10  |
| 108270114 | LOC108270114 | 1.71  | 0.34  | -0.23 | 0.58  | 0.13  |
| 108269454 | LOC108269454 | 0.76  | 0.68  | 0.59  | 0.71  | 1.34  |
| 108269576 | LOC108269576 | -0.27 | -0.13 | 0.19  | 0.54  | 1.51  |
| 108272622 | dctn3        | 1.35  | 0.88  | 0.42  | 0.53  | 0.51  |
| 100528486 | crip1        | 1.49  | 0.65  | -0.30 | -0.16 | 0.32  |
| 108269490 | tmem229b     | 0.02  | -0.26 | 0.23  | 0.51  | 1.35  |
| 108270558 | kiaa0408     | 1.28  | 0.47  | 0.14  | 0.13  | 0.00  |
| 108270060 | crim1        | 1.09  | 0.84  | 0.44  | 0.65  | 0.45  |
| 108269444 | slc35f4      | 0.97  | 0.88  | 1.06  | 0.80  | 0.75  |
| 100528866 | mosc1        | 1.13  | 0.76  | 0.60  | 0.88  | 0.52  |
| 108269577 | LOC108269577 | 1.89  | -0.24 | -0.48 | 0.37  | 0.10  |
| 108258644 | tmem158      | 2.13  | 0.74  | -0.08 | -0.36 | -0.13 |
| 100528680 | clcc3b       | 1.72  | 0.42  | 0.31  | 0.36  | -0.29 |
| 100304695 | LOC100304695 | -1.10 | -0.90 | -0.81 | -0.16 | -0.25 |
| 108270478 | cfl2         | 1.92  | 0.86  | 0.64  | 0.44  | 1.01  |

|           |              |       |       |       |       |       |
|-----------|--------------|-------|-------|-------|-------|-------|
| 108270078 | clec14a      | 1.72  | 0.71  | 0.66  | 0.34  | 0.55  |
| 108270081 | foxa1        | 0.57  | 0.60  | 0.41  | 0.87  | 1.01  |
| 108269751 | irf2bpl      | 1.39  | 0.88  | 0.41  | 0.77  | 0.71  |
| 100528112 | ddo          | 1.08  | 0.79  | 0.65  | 0.85  | 0.35  |
| 108270398 | LOC108270398 | 1.23  | 0.66  | 0.81  | 0.58  | 0.03  |
| 108270140 | LOC108270140 | -1.69 | -0.87 | -0.44 | 1.45  | 1.85  |
| 108270394 | crls1        | 1.15  | 0.23  | 0.36  | 0.45  | 0.46  |
| 108270307 | plcb1        | -1.18 | -0.85 | -0.09 | 0.02  | 1.65  |
| 108269916 | LOC108269916 | -1.16 | -0.64 | -0.59 | -0.57 | -0.46 |
| 108269852 | stxbp6       | 1.21  | 0.71  | 0.34  | 0.91  | 0.85  |
| 108270227 | nek9         | 1.20  | 0.94  | 0.85  | 0.88  | 0.42  |
| 108270230 | acypl        | -1.28 | -0.15 | -0.76 | -0.84 | -0.19 |
| 108270141 | ltbp2        | 1.60  | 0.19  | -0.02 | 0.00  | 0.23  |
| 108270799 | LOC108270799 | -1.60 | -0.60 | -0.46 | -0.34 | -0.19 |
| 108269430 | LOC108269430 | -0.80 | 0.32  | 0.35  | 1.77  | 3.37  |
| 108270847 | LOC108270847 | -0.49 | 0.49  | 0.10  | 0.58  | 1.30  |
| 108270187 | LOC108270187 | -0.16 | -0.26 | -0.15 | -0.26 | 1.02  |
| 108270482 | clip4        | -1.02 | -0.68 | -0.20 | -0.70 | -0.60 |
| 108269855 | LOC108269855 | -1.36 | 0.02  | 0.22  | 0.53  | 0.31  |
| 108270093 | LOC108270093 | 1.19  | 0.57  | 0.84  | 1.75  | 0.71  |
| 108270171 | LOC108270171 | -1.21 | -0.65 | -0.42 | -0.80 | -0.90 |
| 108269782 | wdpcp        | -1.06 | -0.47 | -0.43 | -0.43 | -0.52 |
| 108270277 | zmpste24     | 1.52  | 0.87  | 0.56  | 0.89  | 0.56  |
| 108270298 | LOC108270298 | 1.69  | 0.42  | -0.18 | 0.67  | 0.38  |
| 108269834 | LOC108269834 | 3.25  | 1.86  | 2.92  | 2.35  | 3.61  |
| 108269835 | LOC108269835 | -0.08 | -0.05 | 0.54  | 1.56  | 0.85  |
| 108270960 | LOC108270960 | 0.91  | 0.82  | 0.88  | 1.32  | 0.90  |
| 108270226 | LOC108270226 | -0.14 | -0.76 | 0.20  | -0.31 | -1.50 |
| 108270445 | LOC108270445 | 1.21  | 1.12  | 0.78  | 0.63  | 0.92  |
| 108269592 | mtfr1l       | 1.30  | 1.01  | 0.68  | 0.92  | 0.79  |
| 108270269 | LOC108270269 | -0.36 | -0.84 | -1.06 | -1.11 | 0.08  |
| 108270270 | LOC108270270 | -0.48 | -0.78 | -1.14 | -1.08 | -0.07 |
| 108270242 | LOC108270242 | 1.18  | 0.21  | -0.39 | 0.00  | 1.09  |
| 108269487 | LOC108269487 | -0.23 | -0.56 | 0.06  | 2.01  | 2.47  |
| 108269747 | LOC108269747 | 1.36  | 1.91  | 1.21  | 1.50  | 1.72  |
| 108270107 | exo1         | -0.36 | -0.48 | -0.84 | -1.16 | -1.05 |
| 108271305 | LOC108271305 | -1.00 | -1.09 | -0.73 | -0.59 | -0.03 |
| 108271308 | LOC108271308 | 0.68  | 0.78  | 0.87  | 1.38  | 1.10  |
| 108271103 | LOC108271103 | -1.24 | -1.09 | -0.82 | -0.98 | -0.76 |
| 108264798 | st18         | -0.80 | -0.82 | -1.38 | -1.36 | -0.56 |
| 108271315 | LOC108271315 | -0.81 | -0.53 | 0.02  | 1.29  | 2.42  |
| 108271328 | c10h21orf2   | 1.61  | 1.07  | 0.95  | 1.60  | 0.63  |
| 108270720 | nid1         | 1.59  | 0.84  | 0.39  | 0.46  | 1.05  |
| 101154672 | LOC101154672 | -0.94 | -0.88 | -0.94 | -1.47 | -1.17 |
| 108270522 | LOC108270522 | 1.31  | 1.12  | 0.20  | 0.83  | 0.89  |



|           |              |       |       |       |       |       |
|-----------|--------------|-------|-------|-------|-------|-------|
| 108271401 | LOC108271401 | 2.13  | 1.30  | 0.57  | 0.86  | 0.47  |
| 100528421 | mthfs        | 1.06  | 0.58  | 0.28  | 1.04  | 0.54  |
| 108270621 | LOC108270621 | -0.78 | -0.44 | -0.11 | -1.14 | -1.53 |
| 108271128 | cdc14a       | 0.63  | 0.50  | 0.62  | 1.49  | 1.20  |
| 108271518 | LOC108271518 | 0.54  | 0.72  | 1.16  | 1.09  | 0.66  |
| 108270626 | LOC108270626 | 0.66  | 0.81  | 1.32  | 0.90  | 2.07  |
| 108270948 | tm2d1        | 1.62  | 1.14  | 0.92  | 0.74  | 0.79  |
| 100528342 | gamt         | 1.20  | 1.13  | 0.96  | 0.12  | 0.35  |
| 108270589 | LOC108270589 | 1.02  | 1.47  | 0.62  | 0.96  | 0.24  |
| 108270531 | tmem44       | -1.11 | -0.52 | -0.72 | -1.17 | -0.95 |
| 108271102 | col6a1       | 1.17  | 0.43  | 0.15  | 0.53  | 1.24  |
| 108270790 | LOC108270790 | 2.45  | 1.42  | 0.94  | 0.43  | 0.15  |
| 108270801 | LOC108270801 | 1.69  | 0.90  | 0.25  | -1.23 | -0.74 |
| 108270797 | LOC108270797 | -1.20 | -0.73 | -0.73 | -1.13 | -0.69 |
| 108272069 | LOC108272069 | 1.36  | 1.25  | 0.62  | 0.69  | 0.46  |
| 108270848 | LOC108270848 | 1.77  | 1.66  | 1.84  | 1.42  | 0.53  |
| 108271423 | LOC108271423 | -1.23 | -0.37 | -0.30 | -1.04 | -0.50 |
| 108272138 | snx16        | 1.20  | 1.05  | 0.82  | 0.78  | 0.96  |
| 108272213 | LOC108272213 | -0.04 | 0.63  | 1.26  | 1.44  | 1.05  |
| 108272212 | LOC108272212 | 1.46  | 1.12  | 0.70  | 0.32  | 0.51  |
| 108272233 | LOC108272233 | 1.72  | 1.58  | 0.69  | 1.36  | 0.75  |
| 108271747 | LOC108271747 | -1.12 | -0.68 | -1.46 | -1.00 | -0.25 |
| 108272300 | fzd8         | 1.06  | 0.68  | 0.95  | 1.09  | 0.86  |
| 108271935 | LOC108271935 | -1.19 | -0.58 | 0.16  | 0.21  | 1.80  |
| 108272261 | pomgnt1      | 1.16  | 0.92  | 0.56  | 1.15  | 0.70  |
| 108272141 | kank4        | 1.34  | 1.13  | 0.53  | 0.89  | 0.77  |
| 108272280 | dpt          | 1.77  | 0.49  | -0.73 | 0.55  | 1.15  |
| 108271501 | LOC108271501 | -1.10 | -0.74 | 0.05  | -0.50 | -1.37 |
| 108272123 | LOC108272123 | 0.91  | 0.66  | 1.12  | 1.03  | 0.63  |
| 108271959 | LOC108271959 | 0.86  | 1.05  | 1.23  | 0.85  | 0.51  |
| 108271791 | LOC108271791 | 1.38  | 1.01  | 0.41  | 0.44  | 0.48  |
| 108272109 | LOC108272109 | -1.60 | -0.41 | -1.24 | -0.70 | 0.62  |
| 108271764 | LOC108271764 | -0.64 | 0.22  | 0.50  | 1.44  | 1.52  |
| 108271967 | LOC108271967 | 0.58  | 0.82  | 0.87  | 1.15  | 1.49  |
| 108273291 | LOC108273291 | 0.26  | 0.61  | 1.00  | 2.29  | 1.62  |
| 108273347 | LOC108273347 | -0.49 | -0.69 |       | -2.51 | -3.44 |
| 108268243 | LOC108268243 | 0.01  | 0.49  | 0.82  | 1.26  | 1.06  |
| 108273178 | asic4        | 0.65  | 0.97  | 1.26  | 0.89  | 1.15  |
| 100529001 | psmf1        | 1.19  | 0.96  | 0.79  | 1.07  | 0.75  |
| 100305105 | LOC100305105 | 1.84  | 1.30  | 0.78  | 0.92  | 0.97  |
| 108272052 | LOC108272052 | -1.67 | -1.47 | -0.44 | 0.52  | -0.01 |
| 108273281 | LOC108273281 | -0.96 | -0.70 | -1.01 | -0.79 | -1.31 |
| 108273228 | LOC108273228 | 1.09  | 0.72  | 0.89  | 1.11  | 0.85  |
| 108272352 | ift27        | 0.89  | 1.06  | 0.50  | 0.74  | 1.05  |
| 108273171 | cdk15        | 0.05  | 0.72  | 0.47  | 1.16  | 1.61  |

|           |              |       |       |       |       |       |
|-----------|--------------|-------|-------|-------|-------|-------|
| 108272447 | LOC108272447 | -1.10 | -0.80 | -0.71 | -1.00 | -1.09 |
| 108272900 | LOC108272900 | 2.95  | 1.34  | 0.95  | 0.93  | 0.95  |
| 108273157 | LOC108273157 | -0.86 | -0.84 | 0.48  | 2.16  | 3.12  |
| 108273156 | LOC108273156 | -0.04 | 0.04  | 0.81  | 1.83  | 1.78  |
| 108272451 | ccdc40       | -1.35 | -1.18 | -0.87 | -0.58 | -0.06 |
| 108272801 | LOC108272801 | 0.67  | 0.48  | 1.16  | 1.11  | 0.89  |
| 108272528 | LOC108272528 | 1.21  | 0.90  | 0.63  | 0.75  | 1.49  |
| 108272543 | LOC108272543 | -1.31 | -0.82 | -0.76 | -1.02 | -0.62 |
| 108272135 | tbc1d24      | 1.47  | 1.04  | 0.33  | 0.69  | 0.31  |
| 108273217 | LOC108273217 | 2.08  | 1.05  | 0.66  | 0.82  | 0.38  |
| 108273292 | pdik1l       | 1.25  | 0.94  | 1.23  | 1.08  | 0.77  |
| 108272940 | LOC108272940 | -1.00 | -1.07 | -0.44 | -0.27 | -0.55 |
| 108272938 | LOC108272938 | 0.66  | 0.63  | 0.57  | 1.80  | 1.31  |
| 108272466 | LOC108272466 | 1.01  | 0.58  | 0.07  | 1.27  | 1.63  |
| 108273028 | LOC108273028 | 1.26  | 0.51  | -0.25 | 0.42  | 1.51  |
| 108272475 | LOC108272475 | 1.26  | 1.21  | 0.96  | 0.64  | 0.87  |
| 108272514 | smdt1        | 1.88  | 1.47  | 0.90  | 0.78  | 0.56  |
| 108272497 | LOC108272497 | 1.32  | 0.75  | 0.84  | 1.18  | 0.81  |
| 108272498 | kcwj4        | 1.86  | 1.37  | 0.42  | 1.02  | 0.84  |
| 108272485 | LOC108272485 | 0.18  | 0.60  | 1.24  | 1.29  | 0.75  |
| 108272486 | LOC108272486 | 0.61  | 0.39  | 1.18  | 1.13  | 0.70  |
| 108274225 | LOC108274225 | -1.41 | -1.26 | 0.38  | 0.13  | -0.63 |
| 108273839 | LOC108273839 | 0.24  | -0.59 | -1.89 | -0.08 | -1.71 |
| 108273522 | adamts14     | 0.95  | 0.86  | -0.01 | 1.54  | 2.08  |
| 108273862 | LOC108273862 | 1.01  | 1.08  | 1.05  | 1.51  | 0.65  |
| 108273443 | LOC108273443 | 1.02  | 0.74  | 0.58  | 1.34  | 0.20  |
| 108273625 | LOC108273625 | -0.59 | -0.24 | 1.11  | 1.04  | 0.06  |
| 108273408 | mrpl58       | -1.04 | -0.45 | -0.24 | -0.74 | -1.00 |
| 108273747 | LOC108273747 | -0.99 | -0.87 | -0.47 | -1.03 | -1.51 |
| 108273753 | LOC108273753 | -1.82 | -0.98 | -0.74 | -0.93 | -1.19 |
| 108273834 | kdelr2       | 1.75  | 0.96  | 0.75  | 1.14  | 0.81  |
| 108273801 | LOC108273801 | 1.04  | 1.53  | 1.99  | 1.93  | 1.37  |
| 108274089 | LOC108274089 | 0.51  | 0.78  | 1.21  | 1.34  | 0.87  |
| 108274204 | LOC108274204 | 1.00  | 0.49  | 0.33  | 1.12  | 0.62  |
| 108273881 | LOC108273881 | -1.07 | -0.82 | -0.32 | -1.11 | -0.84 |
| 108273873 | LOC108273873 | 1.20  | 0.82  | 0.79  | 1.21  | 0.50  |
| 108273431 | LOC108273431 | 0.00  | -0.21 | 0.64  | 2.71  | 2.43  |
| 108273430 | LOC108273430 | -0.91 | 0.80  | 1.34  | 3.00  | 2.90  |
| 108280942 | LOC108280942 | 0.09  | -0.51 | -1.76 | -1.41 | -0.87 |
| 108273727 | casp7        | 1.24  | 1.07  | 0.99  | 0.92  | 0.20  |
| 108274348 | noxo1        | -2.12 | -1.22 | -0.35 | -0.30 | -0.65 |
| 108273485 | LOC108273485 | -0.60 | -1.12 | -0.28 | -0.69 | -1.03 |
| 108274222 | slc16a12     | 0.03  | -0.25 | 0.02  | -1.13 | -1.38 |
| 108273398 | sox9         | 0.96  | 0.50  | 0.32  | 1.07  | 1.40  |
| 108274374 | rasd1        | -0.08 | -0.25 | 0.46  | 1.08  | 1.94  |

|           |              |       |       |       |       |       |
|-----------|--------------|-------|-------|-------|-------|-------|
| 108274023 | c13h10orf128 | -0.76 | -0.61 | 0.61  | 1.15  | 2.37  |
| 108276098 | LOC108276098 | -1.52 | -1.04 | -0.37 | -0.47 | -0.43 |
| 108273947 | LOC108273947 | 1.10  | 0.80  | 0.56  | 0.65  | 1.44  |
| 108274177 | LOC108274177 | -1.32 | -1.33 | -0.99 | -0.98 | -0.32 |
| 108274795 | LOC108274795 | 0.57  | 1.42  | 1.21  | 0.67  | 0.89  |
| 108274811 | LOC108274811 | -0.85 | -0.55 | -1.09 | -1.01 | -0.73 |
| 108274502 | LOC108274502 | -0.73 | -0.09 | 0.57  | 1.19  | 2.61  |
| 108274863 | rnf5         | 1.69  | 1.57  | 0.95  | 1.25  | 0.85  |
| 108274787 | LOC108274787 | 1.06  | 0.43  | 0.06  | 1.10  | 0.79  |
| 108274839 | ppt2         | 1.55  | 0.73  | 0.64  | 1.37  | 0.67  |
| 108274832 | LOC108274832 | -0.57 | -0.09 | -0.19 | -1.26 | -1.79 |
| 108275440 | LOC108275440 | -0.90 | -0.82 | 0.61  | -1.93 | -3.49 |
| 108275258 | LOC108275258 | 0.07  | -0.07 | 0.59  | 1.63  | 2.56  |
| 108274670 | LOC108274670 | -1.17 | -0.08 | -0.18 | -0.73 | -1.02 |
| 108274952 | gpx3         | 0.47  | 1.37  | 0.96  | 0.75  | 1.10  |
| 108274950 | tnip1        | 0.38  | 0.44  | 0.79  | 1.27  | 1.09  |
| 108279349 | LOC108279349 | -2.40 | -0.95 | -2.03 | -1.88 | -0.90 |
| 108275249 | LOC108275249 | 1.60  | 1.00  | 0.69  | 1.08  | 0.95  |
| 108259405 | LOC108259405 | -3.31 | -3.72 | -5.51 | -2.40 | -4.25 |
| 108264360 | fmnl1        | -1.03 | -1.12 | -0.51 | -0.72 | 0.13  |
| 108274986 | slc27a2      | -1.05 | -0.78 | -0.69 | -1.21 | -0.94 |
| 108259575 | pex11a       | 1.40  | 0.92  | 1.09  | 0.51  | 0.55  |
| 108274561 | gcnt3        | 0.20  | -0.24 | 0.37  | 1.16  | 1.49  |
| 108274922 | LOC108274922 | -0.05 | 0.13  | 0.82  | 1.15  | 1.27  |
| 108275415 | ehf          | -0.79 | -0.46 | 0.46  | 1.25  | 1.52  |
| 108274498 | LOC108274498 | -0.46 | -1.16 | -1.20 | -0.39 | -0.22 |
| 108274569 | fbxo31       | 1.02  | 1.08  | 0.84  | 0.74  | 0.27  |
| 108275154 | znf469       | 0.77  | 1.06  | 1.03  | 0.99  | 0.88  |
| 108274725 | LOC108274725 | -0.23 | 0.23  | 1.08  | 2.84  | 3.51  |
| 108259475 | LOC108259475 | 1.82  | 1.10  | 0.47  | 0.56  | 0.18  |
| 108275163 | irf7         | -1.22 | -0.04 | -0.55 | -1.38 | -0.62 |
| 108275442 | LOC108275442 | 1.45  | 0.86  | 0.55  | 1.09  | 0.89  |
| 108259201 | gpatch8      | -1.41 | -0.96 | -0.74 | -1.10 | -0.96 |
| 108274684 | tmem173      | -1.29 | -0.68 | 0.06  | -0.29 | -1.07 |
| 108275394 | LOC108275394 | 0.58  | 0.39  | 0.58  | 1.30  | 1.27  |
| 108274643 | LOC108274643 | -0.70 | -0.54 | -0.56 | -1.14 | -1.63 |
| 108274777 | LOC108274777 | 0.82  | 1.35  | 1.30  | 0.94  | 0.94  |
| 108274720 | LOC108274720 | -0.65 | -0.26 | -1.07 | -1.10 | -0.15 |
| 108274771 | chpt1        | -1.11 | -0.82 | -0.94 | -1.02 | -0.68 |
| 108276268 | wisp2        | 1.41  | 0.02  | 0.27  | 0.44  | 2.07  |
| 108276267 | LOC108276267 | -0.77 | -0.77 | -0.93 | -1.30 | -1.57 |
| 108260459 | LOC108260459 | 1.23  | 1.04  | 0.81  | 0.76  | 0.72  |
| 108275470 | LOC108275470 | -0.46 | -1.60 | -1.85 | -0.91 | -0.14 |
| 108275533 | LOC108275533 | -0.99 | -1.15 | -1.31 | -0.82 | -0.37 |
| 108260469 | LOC108260469 | -1.32 | -0.51 | -0.28 | -1.22 | -0.47 |

|           |              |       |       |       |       |       |
|-----------|--------------|-------|-------|-------|-------|-------|
| 108275916 | LOC108275916 | -0.32 | -0.61 | -0.21 | -1.56 | -1.42 |
| 108276062 | LOC108276062 | 2.07  | 0.72  | 0.24  | 0.67  | 1.02  |
| 108276152 | LOC108276152 | -1.32 | -0.99 | -0.20 | -0.86 | -1.78 |
| 108275546 | tcf21        | -1.06 | -0.71 | -1.32 | -0.68 | -0.24 |
| 108276204 | slc2a12      | 0.74  | 1.29  | 1.47  | 1.00  | 0.86  |
| 108275525 | LOC108275525 | 1.75  | 1.03  | 0.04  | 0.35  | 0.38  |
| 108276005 | LOC108276005 | -0.69 | -0.54 | -0.95 | -1.53 | -1.52 |
| 108276007 | gpx7         | 1.20  | 0.98  | 0.88  | 0.34  | 1.57  |
| 108275724 | LOC108275724 | -0.89 | -0.94 | -0.54 | -1.16 | -1.87 |
| 108275726 | LOC108275726 | -1.60 | -0.47 | -1.19 | 0.13  | 1.15  |
| 108276115 | LOC108276115 | -1.32 | -1.09 | -0.66 | -0.92 | -0.48 |
| 108275773 | LOC108275773 | 0.96  | 0.59  | 1.05  | 1.87  | 1.36  |
| 108275545 | haus8        | -0.56 | -1.06 | -0.64 | -1.02 | -0.66 |
| 108256452 | LOC108256452 | -1.91 | -1.50 | -0.62 | -0.54 | -0.74 |
| 108275936 | LOC108275936 | 1.13  | 0.84  | 0.66  | 1.08  | 0.87  |
| 100528610 | icmt         | 1.49  | 0.95  | 0.47  | 1.02  | 0.27  |
| 108276034 | tll10        | -1.70 | -1.11 | -0.66 | -0.78 | -0.39 |
| 108275494 | LOC108275494 | 0.24  | 0.82  | 0.85  | 1.09  | 1.20  |
| 108275855 | clstn1       | 1.66  | 1.09  | 0.93  | 0.91  | 0.82  |
| 108276096 | c15h1orf127  | -1.48 | -0.75 | -0.57 | -1.10 | -0.82 |
| 100528333 | ptges3       | 1.96  | 1.08  | 0.48  | 0.96  | 0.84  |
| 108276497 | figl2        | 1.38  | 1.13  | 0.80  | 0.50  | 0.14  |
| 108276145 | LOC108276145 | 1.04  | 1.11  | 0.61  | 0.82  | 0.73  |
| 108276146 | arhgef25     | 0.48  | 0.71  | 0.81  | 1.05  | 1.43  |
| 108275820 | fam150b      | 2.26  | 1.67  | 1.49  | 1.48  | 2.33  |
| 108276370 | lgr6         | 0.78  | 1.03  | 0.26  | 0.81  | 1.24  |
| 108275790 | LOC108275790 | -2.38 | -1.03 | 0.46  | 1.92  | 3.23  |
| 108258145 | LOC108258145 | 1.61  | 1.04  | 0.70  | 0.80  | 0.50  |
| 100528381 | praf3        | 2.25  | 1.61  | 0.63  | 0.97  | 0.45  |
| 108279890 | vat1         | -0.80 | -0.60 | -0.69 | -1.16 | -1.20 |
| 108277007 | LOC108277007 | 0.27  | -0.16 | 0.96  | 1.31  | 1.44  |
| 108277295 | LOC108277295 | -0.96 | -1.22 | -0.92 | -1.02 | 0.21  |
| 108276581 | LOC108276581 | -1.28 | -1.00 | 0.14  | -0.28 | 0.06  |
| 108276522 | LOC108276522 | -1.46 | -0.91 | -0.75 | -1.08 | -0.83 |
| 108277371 | LOC108277371 | 1.99  | 0.74  | 0.74  | 0.71  | 1.04  |
| 100335032 | LOC100335032 | 0.55  | 0.55  | 0.58  | 1.14  | 1.48  |
| 108277113 | LOC108277113 | 1.16  | 1.15  | 0.42  | 0.16  | -0.12 |
| 108260737 | ngfr         | 1.45  | 1.02  | 0.72  | 0.51  | 0.67  |
| 108277203 | LOC108277203 | -1.13 | -0.56 | -0.48 | -1.16 | -0.86 |
| 108276615 | katnal2      | -1.05 | -1.71 | -1.66 | -0.68 | -0.74 |
| 108277265 | LOC108277265 | -1.64 | -1.91 | -0.98 | -1.36 | -1.10 |
| 108276979 | LOC108276979 | 1.18  | 0.73  | 1.02  | 0.48  | 0.49  |
| 108276999 | LOC108276999 | 0.59  | 0.47  | 0.70  | 1.25  | 1.24  |
| 108277387 | ddx4         | -0.22 | -0.24 | 0.02  | 1.46  | 4.10  |
| 108274985 | LOC108274985 | -1.20 | -0.13 | 0.32  | -0.73 | -1.74 |

|           |              |       |       |       |       |       |
|-----------|--------------|-------|-------|-------|-------|-------|
| 108277256 | LOC108277256 | -1.87 | -0.71 | 0.26  | -0.08 | -1.83 |
| 108276644 | LOC108276644 | -1.79 | -1.01 | -0.04 | -0.38 | -0.69 |
| 108277247 | LOC108277247 | 0.44  | 0.14  | 0.77  | 1.24  | 2.15  |
| 108277261 | LOC108277261 | -1.27 | -1.02 | -0.40 | -0.53 | -0.70 |
| 108276997 | klhl35       | -1.72 | -3.45 | 0.07  | 3.45  | 3.81  |
| 108280004 | sh2b1        | 0.90  | 0.64  | 1.04  | 1.13  | 0.57  |
| 100528216 | slc25a1      | 1.06  | 0.85  | 0.59  | 1.05  | 0.34  |
| 108277045 | uvrag        | -1.23 | -0.90 | -0.74 | -0.91 | -1.15 |
| 108260470 | LOC108260470 | 1.59  | 1.24  | 0.55  | 0.80  | 0.91  |
| 108277346 | LOC108277346 | 1.37  | 0.52  | 0.79  | 0.17  | 1.46  |
| 108277331 | LOC108277331 | -0.06 | 0.05  | 0.91  | 1.35  | 1.30  |
| 108276796 | LOC108276796 | -1.42 | -0.87 | -0.81 | -1.52 | -0.89 |
| 108278015 | LOC108278015 | -0.86 | -0.64 | -0.85 | 1.35  | 1.19  |
| 108278020 | xrcc1        | -1.03 | -0.87 | -0.81 | -0.91 | -1.02 |
| 108276915 | LOC108276915 | 1.05  | 1.02  | 0.46  | -0.31 | -0.22 |
| 108278375 | nos2         | -1.98 | -0.47 | 0.78  | 1.37  | 0.19  |
| 108278123 | LOC108278123 | -1.05 | -0.90 | -0.62 | -0.77 | -1.06 |
| 108278135 | LOC108278135 | -0.99 | -1.38 | -0.57 | -0.90 | -1.39 |
| 100528654 | rab6b        | 1.09  | 0.90  | 0.78  | 1.17  | 0.88  |
| 108277775 | LOC108277775 | -0.91 | -1.41 | -0.88 | -0.98 | -1.64 |
| 108277777 | LOC108277777 | 1.19  | 1.01  | 0.76  | 0.77  | 0.73  |
| 108277825 | slc6a4       | 0.11  | 0.20  | 0.27  | 1.18  | 1.47  |
| 108278175 | ano7         | 0.26  | 1.04  | 0.51  | 0.83  | 1.25  |
| 108278201 | sgcg         | 1.19  | 0.09  | 0.02  | 0.25  | 1.31  |
| 108277932 | calm3        | 1.74  | 1.08  | 0.37  | 0.49  | 0.61  |
| 108277469 | etv1         | -0.78 | -1.27 | -1.14 | -0.98 | -0.97 |
| 108277463 | LOC108277463 | -0.47 | -0.04 | 0.81  | 1.61  | 1.09  |
| 108277762 | LOC108277762 | -1.53 | -0.09 | -1.07 | -0.89 | -0.80 |
| 108277715 | LOC108277715 | -1.11 | -0.95 | -0.67 | -1.02 | -0.37 |
| 108277754 | fzd4         | 0.90  | 1.08  | 0.46  | 0.97  | 1.08  |
| 108277593 | LOC108277593 | -4.34 | -4.56 | -2.24 | -2.98 | 0.01  |
| 108277966 | LOC108277966 | -0.61 | -1.34 | -0.99 | -0.96 | -1.33 |
| 108277499 | LOC108277499 | 1.00  | 1.31  | 1.11  | 0.89  | 0.54  |
| 108278359 | rnf26        | 1.15  | 1.00  | 0.84  | 1.30  | 0.43  |
| 108277698 | LOC108277698 | 1.41  | 1.08  | 0.62  | 1.00  | 0.88  |
| 108278324 | hmox1        | 1.39  | 0.97  | 1.77  | 0.69  | 0.58  |
| 108278341 | LOC108278341 | 1.92  | 0.01  | 0.17  | 1.20  | 0.44  |
| 108278205 | LOC108278205 | -0.97 | -1.37 | -1.10 | -0.53 | -0.43 |
| 108277857 | LOC108277857 | 1.39  | 1.45  | 0.52  | 1.09  | 0.86  |
| 108278371 | cd3e         | -0.10 | 0.58  | 0.75  | 1.27  | 1.22  |
| 108281014 | LOC108281014 | -0.49 | -0.24 | -0.38 | -1.17 | -1.37 |
| 108279270 | LOC108279270 | 1.65  | 0.64  | 0.76  | 0.39  | 1.21  |
| 100528347 | gstt2b       | 1.30  | 1.69  | 0.72  | 0.70  | 0.56  |
| 100528785 | nsa2         | 1.12  | 0.95  | 1.02  | 0.77  | 0.80  |
| 108279168 | LOC108279168 | 0.47  | 0.21  | 0.28  | 1.16  | 2.26  |

|           |              |       |       |       |       |       |
|-----------|--------------|-------|-------|-------|-------|-------|
| 108278693 | LOC108278693 | -0.23 | -0.03 | 1.52  | 2.01  | 0.82  |
| 108278695 | LOC108278695 | -0.57 | -0.15 | 1.41  | 1.35  | -0.06 |
| 108278696 | LOC108278696 | -0.69 | -0.42 | 1.15  | 1.26  | -0.21 |
| 108278560 | LOC108278560 | 0.52  | 0.88  | 0.65  | 1.10  | 1.21  |
| 100528919 | clic4        | 1.64  | 1.21  | 0.68  | 0.89  | 0.57  |
| 108278652 | LOC108278652 | 0.70  | 0.83  | 1.20  | 1.08  | 0.73  |
| 108279127 | mmp11        | 1.02  | 0.62  | 0.34  | 1.03  | 0.46  |
| 108279258 | zbtb7c       | 0.08  | -0.34 | -0.83 | -1.05 | -1.44 |
| 108279345 | LOC108279345 | -0.80 | -0.78 | -1.08 | -1.39 | -0.95 |
| 108276237 | fbxw9        | 1.00  | 0.77  | 0.78  | 1.01  | 0.79  |
| 108279121 | ccbe1        | -1.31 | -0.78 | -0.87 | -1.04 | -0.77 |
| 108278863 | LOC108278863 | 1.54  | 1.13  | 0.71  | 0.53  | 0.42  |
| 108278862 | LOC108278862 | -1.49 | -1.29 | -0.68 | -0.76 | -0.75 |
| 108279265 | LOC108279265 | -0.26 | -0.35 | -1.31 | -1.04 | 0.34  |
| 108278628 | LOC108278628 | 0.80  | 0.51  | 1.31  | 1.04  | 0.70  |
| 108279355 | LOC108279355 | 1.08  | -0.16 | -1.28 | -0.88 | -0.03 |
| 108278737 | LOC108278737 | -1.30 | -1.23 | -0.46 | -0.52 | -0.79 |
| 108279194 | LOC108279194 | 1.85  | 1.00  | 0.58  | 1.55  | 0.78  |
| 108261297 | mfsd6l       | 0.42  | 0.32  | 0.25  | 1.15  | 1.11  |
| 108278278 | LOC108278278 | 1.49  | 0.60  | 0.68  | 0.90  | 1.04  |
| 108279235 | qpctl        | -1.34 | -0.16 | -0.07 | -0.76 | -1.16 |
| 108279190 | fgfr4        | -1.17 | -0.83 | -1.03 | -0.76 | -0.23 |
| 108278941 | LOC108278941 | 1.55  | 1.48  | 1.16  | 2.91  | 2.42  |
| 108278939 | LOC108278939 | -0.50 | -0.03 | 0.99  | 1.53  | 1.40  |
| 108278763 | mpp1         | -1.45 | -0.76 | -0.81 | -1.01 | -0.69 |
| 108278494 | LOC108278494 | -1.35 | -0.36 | -1.05 | -0.73 | -0.55 |
| 108278996 | LOC108278996 | -1.02 | -0.58 | -0.20 | -0.94 | -1.07 |
| 108278673 | tmem185a     | 1.54  | 1.19  | 0.42  | 0.76  | 0.83  |
| 108278510 | LOC108278510 | 1.45  | 0.41  | 0.56  | 0.12  | -1.41 |
| 108279534 | LOC108279534 | -1.87 | -1.64 | -0.75 | -0.34 | -0.80 |
| 108279557 | LOC108279557 | -1.44 | -1.20 | -0.53 | -0.60 | -0.61 |
| 108279884 | ccdc167      | 1.31  | 1.01  | 0.68  | 0.92  | 0.86  |
| 108279665 | ptpro        | -1.32 | -0.94 | -0.72 | -1.07 | -0.76 |
| 108280137 | LOC108280137 | -0.40 | 0.12  | -0.48 | -1.10 | -1.42 |
| 108279855 | prkcq        | -0.25 | 0.24  | 0.58  | 1.35  | 1.02  |
| 108280134 | lrtm2        | 1.90  | 1.02  | 0.36  | 1.84  | 1.34  |
| 108280076 | LOC108280076 | 0.87  | 0.96  | 1.04  | 1.41  | 1.32  |
| 108280100 | LOC108280100 | -1.48 | -1.10 | -0.16 | -0.29 | -0.07 |
| 108280087 | LOC108280087 | 0.73  | 0.63  | 0.76  | 1.46  | 1.10  |
| 108280085 | LOC108280085 | 0.76  | 0.94  | 0.98  | 1.06  | 1.12  |
| 108279742 | gata3        | 0.09  | 0.19  | 0.64  | 1.43  | 1.69  |
| 108279953 | cpm          | 1.41  | 1.14  | 0.92  | 0.99  | 0.87  |
| 108279437 | il17rel      | -0.08 | -0.20 | -0.19 | 1.05  | 1.18  |
| 108279434 | LOC108279434 | 1.91  | 1.80  | 0.97  | 1.25  | 1.22  |
| 108280020 | mcat         | 1.61  | 1.03  | 0.40  | 0.37  | 0.75  |

|           |              |       |       |       |       |       |
|-----------|--------------|-------|-------|-------|-------|-------|
| 100304694 | LOC100304694 | -0.71 | -0.69 | -0.86 | -1.25 | -1.54 |
| 100305073 | LOC100305073 | -1.81 | -1.18 | -0.48 | -0.18 | -0.76 |
| 108279769 | wif1         | -0.42 | -0.85 | -1.13 | -1.38 | -0.51 |
| 108277091 | LOC108277091 | -0.77 | -1.14 | -0.41 | -0.82 | -1.53 |
| 108279754 | LOC108279754 | 3.43  | 1.48  | 0.67  | 1.27  | 0.98  |
| 108279843 | LOC108279843 | -1.21 | -1.16 | -0.94 | -0.92 | -0.53 |
| 108280368 | pnrc2        | 1.32  | 0.98  | 0.79  | 1.10  | 1.00  |
| 108280269 | LOC108280269 | -0.70 | 0.99  | 0.35  | 1.48  | 1.61  |
| 108280189 | LOC108280189 | 0.27  | -0.17 | 0.61  | 1.07  | 1.62  |
| 108264768 | LOC108264768 | 0.42  | 0.24  | 1.58  | 0.89  | 1.34  |
| 108280693 | LOC108280693 | -0.11 | 0.51  | 0.88  | 1.55  | 1.09  |
| 108280904 | LOC108280904 | 1.55  | 1.12  | 0.49  | 0.87  | 0.93  |
| 108280736 | LOC108280736 | 0.35  | 0.69  | 1.80  | 1.37  | 0.32  |
| 108280590 | LOC108280590 | -1.21 | -0.53 | -0.52 | -0.73 | -1.12 |
| 108280886 | LOC108280886 | 1.80  | 1.27  | 0.65  | 0.98  | 0.84  |
| 108280823 | pask         | -0.33 | -0.50 | -1.19 | -1.07 | -0.18 |
| 108280780 | LOC108280780 | 0.89  | 1.09  | 0.96  | 1.18  | 0.71  |
| 108280420 | ppp6c        | 1.32  | 1.08  | 0.59  | 0.91  | 0.79  |
| 108280423 | LOC108280423 | -0.65 | 0.20  | 0.70  | 1.68  | 1.96  |
| 108280508 | LOC108280508 | 1.10  | 1.58  | 1.57  | 1.21  | 1.01  |
| 108280624 | LOC108280624 | -2.07 | -1.18 | -0.63 | -0.45 | 0.17  |
| 108280522 | LOC108280522 | 1.03  | 0.88  | 1.23  | 0.09  | 0.56  |
| 108280909 | LOC108280909 | 1.52  | 0.96  | 1.07  | 0.89  | 0.26  |
| 108280682 | LOC108280682 | 1.00  | 0.85  | 0.82  | 1.10  | 0.98  |
| 108258663 | LOC108258663 | -0.37 | -0.23 | 0.98  | 1.26  | 1.59  |
| 108280570 | LOC108280570 | -1.09 | -0.71 | -0.76 | -1.05 | -0.74 |
| 108259106 | LOC108259106 | -1.25 | -0.64 | -0.44 | -0.42 | -1.31 |
| 108280796 | LOC108280796 | 1.27  | 0.69  | 0.47  | 1.08  | 0.62  |
| 108280776 | midn         | -0.65 | 1.28  | -0.23 | 0.19  | 1.04  |
| 108280472 | cdc7         | -0.23 | -1.23 | -0.64 | -1.08 | -0.88 |
| 108280833 | LOC108280833 | 1.34  | 0.91  | 0.50  | 0.84  | 1.30  |
| 108276881 | emp2         | 1.42  | 0.44  | 0.39  | 0.48  | 1.00  |
| 108280856 | LOC108280856 | -0.90 | -0.87 | -0.71 | -1.21 | -1.03 |
| 108281036 | dennd2d      | -1.25 | -1.10 | -0.94 | -0.87 | -0.74 |
| 108281073 | lamb3        | -0.54 | -0.40 | -1.38 | -1.85 | -0.91 |
| 108281088 | LOC108281088 | -0.50 | -0.61 | -0.74 | -1.20 | -1.05 |
| 108281086 | cdkn1a       | -0.19 | -0.47 | -1.34 | -1.16 | -0.73 |
| 108254700 | vwa1         | 1.85  | 0.86  | 0.74  | 1.24  | 0.82  |
| 108254949 | abhd14a      | 1.29  | 1.05  | 0.64  | 0.81  | 0.87  |
| 108254722 | ninj1        | -0.47 | -0.69 | -1.08 | -1.03 | 0.14  |
| 108281043 | LOC108281043 | -1.14 | -0.22 | 0.29  | 1.06  | 1.04  |
| 100528727 | arpc4        | 1.61  | 1.02  | 0.64  | 0.70  | 0.73  |
| 108255023 | cadps        | -1.50 | -1.13 | -0.37 | -0.70 | -0.39 |
| 108255218 | mdfi         | 1.40  | 1.00  | 0.56  | 0.43  | 0.22  |
| 108280991 | LOC108280991 | 0.29  | 0.43  | 0.14  | 1.35  | 1.42  |

|           |              |       |       |       |       |       |
|-----------|--------------|-------|-------|-------|-------|-------|
| 108255073 | LOC108255073 | -1.03 | -0.76 | -1.23 | -0.82 | -0.59 |
| 108255274 | LOC108255274 | -1.38 | 1.51  | -0.05 | 0.30  | 0.90  |
| 108280993 | LOC108280993 | -0.85 | -1.35 | -1.15 | -0.51 | -0.12 |
| 108254817 | LOC108254817 | -1.64 | -1.06 | -0.73 | -0.50 | -0.33 |
| 108255091 | LOC108255091 | 1.56  | 0.92  | 0.52  | 1.24  | 0.76  |
| 108254906 | amigo3       | -0.66 | -0.81 | -1.16 | -1.16 | -0.81 |
| 108255083 | gpd1         | -1.25 | -0.76 | -0.80 | -1.46 | -0.93 |
| 108254824 | ecm2         | 1.58  | 1.02  | 0.31  | 0.77  | 0.69  |
| 108255289 | wnt7a        | 1.70  | 0.74  | 1.08  | 0.79  | -0.24 |
| 108254974 | LOC108254974 | 1.06  | 1.12  | 0.93  | 0.37  | 0.42  |
| 108255261 | fam83d       | 1.63  | 0.92  | 0.65  | 1.14  | 0.61  |
| 108255483 | bri3bp       | 1.29  | 0.88  | 0.98  | 1.18  | 0.89  |
| 108256066 | cdca2        | -0.78 | -0.76 | -1.23 | -0.86 | -1.11 |
| 100528776 | pebp1        | 1.13  | 1.02  | 0.42  | 0.59  | 0.63  |
| 108255816 | LOC108255816 | 1.89  | 1.27  | 0.89  | 0.46  | 0.61  |
| 108255518 | LOC108255518 | -0.67 | -1.03 | -0.29 | -0.73 | -2.06 |
| 108256069 | sub1         | 1.47  | 1.08  | 0.92  | 0.85  | 0.83  |
| 108255702 | LOC108255702 | -0.06 | -0.10 | 0.64  | 1.53  | 1.46  |
| 108255701 | LOC108255701 | -0.62 | 0.08  | 1.33  | 1.96  | 1.12  |
| 108255700 | LOC108255700 | -1.14 | 0.36  | 0.71  | 3.90  | 2.70  |
| 100304595 | LOC100304595 | -0.94 | 0.11  | 0.97  | 3.02  | 1.64  |
| 108255962 | vcan         | 1.52  | 1.14  | 1.11  | 1.18  | 1.87  |
| 108255988 | tmem161b     | 1.08  | 0.76  | 1.12  | 0.27  | 0.40  |
| 108256072 | ccdc158      | -0.89 | -1.04 | -1.07 | -0.94 | -0.69 |
| 100304853 | aldh2        | 1.33  | 1.25  | 0.60  | 0.86  | 0.76  |
| 108255392 | LOC108255392 | 2.38  | 2.99  | 1.42  | 2.58  | 2.59  |
| 108255951 | ppil3        | 0.03  | -1.16 | -0.77 | -1.16 | -0.85 |
| 108255493 | fam81b       | -1.36 | -0.88 | -0.70 | -1.25 | -0.69 |
| 108256039 | ubac1        | 1.03  | 1.34  | 0.79  | 1.46  | 0.61  |
| 108255332 | thbs4        | 1.99  | 0.85  | 0.41  | 0.92  | 1.43  |
| 108255524 | LOC108255524 | -0.88 | 0.28  | 0.85  | 2.16  | 1.03  |
| 108255379 | LOC108255379 | 1.37  | 1.34  | 0.18  | -0.94 | 0.84  |
| 108255784 | LOC108255784 | 0.70  | 0.78  | 0.78  | 1.07  | 1.14  |
| 108255881 | LOC108255881 | -1.14 | -1.10 | -0.64 | -0.50 | 0.02  |
| 108255706 | hectd4       | 0.65  | 1.04  | 1.19  | 0.97  | 0.85  |
| 108255745 | selplg       | 0.02  | 0.76  | 0.52  | 1.14  | 1.22  |
| 108255774 | gda          | 1.22  | 0.28  | 0.37  | 0.90  | 1.35  |
| 108255726 | LOC108255726 | 0.68  | 0.66  | 1.59  | 1.22  | 0.69  |
| 108255728 | LOC108255728 | -0.46 | 0.11  | -0.43 | 1.81  | 1.83  |
| 108255579 | LOC108255579 | -1.10 | -0.40 | -0.55 | -0.94 | -1.23 |
| 108255602 | LOC108255602 | -0.68 | -0.93 | -0.28 | -1.12 | -1.84 |
| 108255587 | LOC108255587 | -1.24 | -0.53 | -0.92 | -1.28 | -0.88 |
| 100304628 | LOC100304628 | -1.00 | -0.35 | -0.24 | 1.31  | 0.65  |
| 108256730 | sema5a       | 2.01  | 1.35  | 0.45  | 0.66  | 0.63  |
| 108256577 | LOC108256577 | -1.66 | -1.31 | -0.46 | -0.52 | -0.64 |



|           |              |       |       |       |       |       |
|-----------|--------------|-------|-------|-------|-------|-------|
| 108256436 | pkia         | 1.18  | 1.05  | 0.86  | 0.70  | 0.91  |
| 108256156 | LOC108256156 | 0.51  | 0.85  | 0.72  | 1.66  | 1.70  |
| 108256430 | LOC108256430 | 2.28  | 1.21  | 0.70  | 0.84  | 0.99  |
| 108256665 | alg2         | 1.24  | 0.91  | 0.68  | 1.41  | 0.48  |
| 108256531 | crot         | 1.15  | 1.04  | 0.88  | 0.71  | 0.11  |
| 108256534 | LOC108256534 | -0.33 | 0.01  | 0.34  | 1.34  | 2.05  |
| 108256602 | azin1        | 1.23  | 1.02  | 0.54  | 0.82  | 0.62  |
| 108256364 | LOC108256364 | -1.32 | -1.11 | -0.88 | -0.95 | -0.81 |
| 108256343 | LOC108256343 | 1.17  | 1.16  | 0.72  | 0.86  | 0.81  |
| 108256180 | LOC108256180 | 1.11  | 0.63  | 0.61  | 1.27  | 0.95  |
| 108256235 | LOC108256235 | -1.30 | -1.19 | -0.29 | -0.09 | -0.50 |
| 108256245 | LOC108256245 | 1.39  | 0.88  | 0.61  | 1.25  | 0.94  |
| 108257039 | LOC108257039 | 1.54  | 1.11  | -0.14 | 1.01  | 1.44  |
| 108257012 | LOC108257012 | -1.52 | -0.47 | -1.81 | -1.01 | 0.93  |
| 108257465 | LOC108257465 | -1.07 | -2.30 | -0.03 | -0.51 | -0.22 |
| 108257443 | LOC108257443 | -0.25 | 0.26  | 0.62  | 1.77  | 1.41  |
| 108257479 | LOC108257479 | 0.83  | 1.10  | 0.52  | 0.84  | 1.14  |
| 108257480 | LOC108257480 | 3.22  | 0.71  | 0.70  | 2.25  | 1.32  |
| 100528528 | sdcb         | 1.24  | 1.02  | -0.48 | 0.58  | 0.48  |
| 108257392 | fscn1        | 0.93  | 0.84  | 0.91  | 1.14  | 1.80  |
| 108256800 | LOC108256800 | -1.04 | -1.18 | -0.67 | -0.87 | -0.38 |
| 108256143 | LOC108256143 | 1.36  | 1.11  | 0.99  | 0.74  | 0.69  |
| 108257164 | micall2      | -0.97 | -0.87 | -1.03 | -1.30 | -0.43 |
| 100526699 | LOC100526699 | 1.28  | 1.08  | 0.96  | 0.76  | 0.85  |
| 108274255 | LOC108274255 | -1.21 | -0.73 | 0.04  | -1.22 | -0.48 |
| 108257219 | scin         | 1.29  | 1.33  | 0.70  | 0.55  | 0.52  |
| 108257256 | col8a2       | 3.51  | 2.15  | 1.29  | 1.83  | 3.89  |
| 108257091 | galnt12      | 0.74  | 0.58  | 0.96  | 1.43  | 1.72  |
| 108256763 | LOC108256763 | 2.63  | 1.60  | 0.97  | 0.96  | 0.79  |
| 108256789 | LOC108256789 | 1.13  | 1.02  | 0.73  | 0.67  | 0.78  |
| 108256928 | fbxl6        | -0.20 | 0.10  | 0.39  | 1.06  | 1.96  |
| 108257496 | nfatc1       | -1.17 | -0.79 | -1.22 | -0.81 | 0.05  |
| 108257131 | LOC108257131 | -1.61 | -1.02 | -0.25 | -0.62 | -0.53 |
| 108257233 | LOC108257233 | 1.52  | 1.04  | 0.76  | 0.87  | 0.39  |
| 108274412 | smim22       | 1.79  | 0.96  | 0.47  | 1.15  | 0.96  |
| 108257255 | gcgr         | -0.72 | 0.53  | -0.33 | 1.31  | 1.38  |
| 108257286 | LOC108257286 | -1.75 | -1.00 | 0.36  | -0.08 | -0.73 |
| 108257306 | ncald        | -0.80 | -0.25 | -0.02 | 1.18  | 1.77  |
| 108257330 | LOC108257330 | 1.69  | 1.25  | 0.59  | 0.96  | 0.66  |
| 100304503 | nm23         | 1.34  | 1.08  | 0.84  | 0.30  | 0.43  |
| 108257020 | LOC108257020 | 0.09  | 0.27  | 1.19  | 1.34  | 0.57  |
| 108257051 | LOC108257051 | -1.32 | 0.02  | -0.02 | -0.12 | -1.24 |
| 108256994 | LOC108256994 | 0.92  | 0.78  | 1.01  | 0.87  | 1.29  |
| 108258222 | LOC108258222 | -1.88 | -0.59 | -1.13 | -0.97 | -0.38 |
| 108258233 | LOC108258233 | 1.73  | 1.23  | 0.60  | 0.95  | 0.93  |

|           |              |       |       |       |       |       |
|-----------|--------------|-------|-------|-------|-------|-------|
| 108257684 | LOC108257684 | 1.38  | 0.33  | 0.56  | 1.05  | 0.60  |
| 108257551 | chga         | -1.63 | -1.14 | -1.32 | -1.65 | -0.98 |
| 108257594 | rab15        | -0.33 | -0.64 | -0.63 | -1.92 | -1.49 |
| 108257878 | mcm9         | -0.65 | -0.55 | -0.74 | -1.17 | -1.07 |
| 108257938 | LOC108257938 | -2.00 | -0.89 | -1.23 | -0.79 | -0.51 |
| 108257695 | LOC108257695 | 1.40  | 1.34  | 2.19  | 3.45  | 3.62  |
| 108275207 | LOC108275207 | 0.71  | 0.79  | 1.20  | 1.15  | 0.75  |
| 108258146 | scara3       | 2.53  | 1.08  | 0.44  | 0.82  | 0.35  |
| 108257542 | ociad2       | 1.36  | 1.07  | 0.46  | 0.52  | 0.83  |
| 108257981 | lrrc66       | -1.11 | -0.62 | -0.46 | -0.82 | -1.01 |
| 108258002 | LOC108258002 | -2.36 | -0.88 | -0.87 | -2.45 | -1.06 |
| 108258027 | kit          | 1.04  | 1.03  | 0.93  | 0.71  | 0.78  |
| 100305121 | LOC100305121 | -1.06 | -0.29 | -1.10 | -0.38 | -0.15 |
| 108257521 | LOC108257521 | -0.39 | 0.25  | 1.05  | 1.51  | 0.95  |
| 108258005 | LOC108258005 | 1.17  | 0.63  | 1.18  | 0.59  | 0.77  |
| 108257537 | LOC108257537 | -0.28 | -0.17 | 0.89  | 1.78  | 1.36  |
| 108257611 | LOC108257611 | -0.16 | 0.39  | 0.87  | 1.47  | 2.11  |
| 108258036 | LOC108258036 | 0.76  | 0.98  | 0.82  | 1.43  | 1.13  |
| 108257565 | LOC108257565 | 0.05  | -0.28 | -0.40 | 1.93  | 2.67  |
| 108258135 | fncl1        | 1.82  | 0.84  | 0.76  | 0.83  | 1.35  |
| 108257998 | allc         | -1.13 | -0.62 | -1.16 | -0.78 | -0.67 |
| 108258085 | fmnl         | 0.43  | 1.12  | 0.78  | 0.72  | 1.01  |
| 108257547 | LOC108257547 | 0.83  | 0.05  | 0.33  | 1.60  | 1.23  |
| 108257822 | LOC108257822 | -1.34 | -1.07 | -0.78 | -0.77 | -0.34 |
| 108258662 | chtf18       | -0.65 | -0.86 | -1.03 | -0.94 | -1.05 |
| 108258628 | LOC108258628 | -1.91 | -0.57 | -0.06 | -0.88 | -1.73 |
| 108258633 | LOC108258633 | -1.43 | -1.11 | -0.57 | -0.75 | -0.31 |
| 108258629 | LOC108258629 | -1.17 | -0.37 | -0.17 | -0.63 | -1.31 |
| 108258555 | LOC108258555 | -1.42 | -1.54 | -1.46 | -1.19 | -1.68 |
| 108258553 | LOC108258553 | 0.16  | -0.96 | -0.85 | -1.92 | -1.61 |
| 108260332 | LOC108260332 | 0.23  | 1.20  | 1.84  | 0.60  | 1.48  |
| 108259056 | LOC108259056 | -0.16 | 0.32  | 1.19  | 1.22  | 0.56  |
| 108258358 | LOC108258358 | -1.06 | -0.80 | -0.47 | 2.70  | 3.36  |
| 108258868 | LOC108258868 | 0.03  | 0.00  | 0.93  | 2.45  | 3.51  |
| 108258871 | LOC108258871 | -0.09 | -1.19 | -0.42 | 3.05  | 2.93  |
| 108258873 | LOC108258873 | -1.31 | -0.50 | 0.35  | 1.20  | 2.47  |
| 108258577 | LOC108258577 | -1.00 | -0.62 | 0.06  | 1.14  | -0.21 |
| 108258921 | cnp3         | -1.17 | -1.00 | -0.87 | -0.88 | -0.89 |
| 108259053 | LOC108259053 | 1.47  | 0.73  | 0.52  | 1.24  | 0.68  |
| 108258875 | LOC108258875 | 0.68  | 1.00  | 0.87  | 1.33  | 0.93  |
| 108258864 | LOC108258864 | -2.87 | -2.03 | -0.40 | 0.82  | -0.21 |
| 108258944 | LOC108258944 | 1.97  | 0.97  | 0.48  | 0.88  | 1.51  |
| 108258506 | LOC108258506 | -1.10 | -1.56 | -0.58 | -0.35 | -0.63 |
| 108279694 | LOC108279694 | 0.63  | 0.36  | 1.10  | 0.67  | 1.30  |
| 108259041 | LOC108259041 | 1.14  | 0.70  | 0.94  | 1.05  | 0.17  |

|           |              |       |       |       |       |       |
|-----------|--------------|-------|-------|-------|-------|-------|
| 108258325 | otx1         | 0.21  | 1.50  | 0.44  | 0.15  | 1.65  |
| 108258581 | LOC108258581 | 0.75  | 0.96  | 1.67  | 1.07  | 0.42  |
| 108258721 | LOC108258721 | -0.06 | 0.24  | 0.78  | 1.11  | 1.28  |
| 108256501 | pm20d2       | -1.41 | -1.20 | -0.21 | -0.91 | -0.13 |
| 108258732 | LOC108258732 | -0.70 | -0.08 | -0.01 | 2.27  | 3.77  |
| 108258741 | LOC108258741 | 0.11  | 0.13  | 1.08  | 3.26  | 4.69  |
| 108258422 | LOC108258422 | -1.27 | -0.91 | -0.99 | -1.15 | -0.44 |
| 108258826 | LOC108258826 | -1.02 | -0.79 | -0.74 | -1.29 | -0.59 |
| 108258810 | LOC108258810 | -0.98 | -0.09 | 1.00  | 1.36  | 1.14  |
| 108258797 | LOC108258797 | 1.21  | 0.04  | -0.27 | 0.95  | 1.07  |
| 108258733 | LOC108258733 | -0.91 | -0.51 | 0.37  | 1.43  | 2.87  |
| 108258823 | LOC108258823 | -0.10 | 0.45  | 1.03  | 0.63  | 1.23  |
| 108259157 | LOC108259157 | -2.13 | -0.92 | 0.07  | -0.70 | -1.15 |
| 108259279 | shcbp1       | -0.25 | -0.77 | -1.01 | -0.93 | -1.06 |
| 108259355 | LOC108259355 | 0.68  | 1.19  | 1.13  | 0.73  | 0.93  |
| 108259588 | vps35        | 1.36  | 0.96  | 0.70  | 1.30  | 0.62  |
| 100528628 | ary1         | -0.83 | -1.67 | -1.87 | -0.16 | 0.05  |
| 108259681 | irx3         | -0.83 | -0.77 | -0.55 | -1.01 | -1.36 |
| 108259638 | mmp2         | 1.85  | 0.94  | 0.58  | 0.94  | 1.11  |
| 108259643 | LOC108259643 | 0.84  | 1.04  | 1.16  | 0.63  | -0.10 |
| 108280119 | LOC108280119 | -0.96 | -1.08 | -0.99 | -0.94 | -1.44 |
| 108259098 | itga11       | 1.46  | 0.33  | 0.26  | 0.00  | 1.15  |
| 108259296 | LOC108259296 | 1.55  | -0.03 | 0.34  | 0.72  | 1.02  |
| 108259668 | mtss11       | -1.64 | -1.05 | -0.85 | -0.73 | -0.26 |
| 100528676 | igf2         | 1.44  | -0.13 | 0.43  | 1.33  | 0.54  |
| 100528285 | arpc5        | 1.69  | 1.04  | 0.41  | 0.81  | 0.84  |
| 108259673 | LOC108259673 | 0.28  | 0.31  | 0.02  | -1.13 | -1.56 |
| 100528674 | sord         | 1.01  | 0.67  | 1.57  | 0.14  | 0.00  |
| 108259109 | rrad         | -1.46 | 0.71  | -0.27 | -0.83 | 1.42  |
| 108259606 | LOC108259606 | 0.76  | 0.69  | 0.70  | 1.32  | 1.73  |
| 108259544 | LOC108259544 | 1.44  | 1.28  | 0.69  | 0.85  | 0.84  |
| 108259248 | LOC108259248 | -1.57 | -0.99 | -0.70 | -1.05 | -0.25 |
| 108259612 | LOC108259612 | -1.11 | -0.68 | -1.05 | -0.83 | -0.51 |
| 108259401 | LOC108259401 | 2.51  | 0.61  | 0.22  | 0.54  | 1.30  |
| 108259413 | LOC108259413 | 1.03  | 0.81  | 1.06  | 0.78  | 1.09  |
| 108259448 | dnaI4        | -0.60 | -0.85 | -1.31 | -1.11 | -0.63 |
| 108259563 | bmX          | 0.18  | -0.40 | 0.00  | 1.09  | 1.68  |
| 108260443 | LOC108260443 | 1.48  | 1.13  | -0.32 | 0.36  | 0.30  |
| 108259697 | LOC108259697 | -1.38 | 0.19  | 0.96  | 1.64  | 0.78  |
| 108259807 | LOC108259807 | -0.28 | 0.29  | 1.62  | 2.63  | 3.93  |
| 108259841 | LOC108259841 | -1.49 | -1.26 | -0.77 | -0.84 | -0.87 |
| 108260015 | LOC108260015 | -1.63 | -1.19 | -0.74 | -0.74 | -0.91 |
| 108259988 | LOC108259988 | 0.32  | 0.29  | 1.07  | 1.10  | 0.51  |
| 108260035 | LOC108260035 | -1.08 | -1.05 | -0.04 | 0.15  | -0.49 |
| 100304490 | ncCrp1       | 1.83  | 1.06  | 0.70  | -0.13 | 0.16  |

|           |              |       |       |       |       |       |
|-----------|--------------|-------|-------|-------|-------|-------|
| 108259865 | pafah1b2     | -1.16 | -1.27 | -0.36 | -0.50 | -0.10 |
| 108259770 | LOC108259770 | -1.81 | -1.23 | -0.65 | -0.60 | -0.65 |
| 108259748 | fkbp6        | -1.47 | -1.95 | -1.32 | -2.09 | -1.26 |
| 108259721 | LOC108259721 | 2.04  | 1.48  | 0.90  | 0.95  | 0.67  |
| 108259965 | LOC108259965 | -1.09 | -0.92 | -0.88 | -1.11 | -0.65 |
| 100304587 | LOC100304587 | 1.48  | -0.04 | -1.05 | -0.11 | -0.03 |
| 108259899 | rsph6a       | -0.87 | -1.73 | -1.13 | -0.71 | -0.60 |
| 108260244 | LOC108260244 | 2.51  | 1.25  | 0.64  | 0.79  | 0.79  |
| 108260349 | aspa         | 1.17  | 0.74  | 0.90  | 1.08  | 0.30  |
| 108259883 | specc1       | 1.06  | 0.73  | 0.53  | 1.06  | 0.91  |
| 108260458 | LOC108260458 | 1.26  | 1.11  | 0.93  | 0.26  | -0.25 |
| 108260031 | mcc          | 1.09  | 0.95  | 1.03  | 0.88  | 0.92  |
| 108259917 | ptges        | 1.69  | 1.31  | 0.37  | 0.08  | 0.58  |
| 108260343 | slc25a25     | -1.04 | -0.87 | -1.23 | -1.00 | -0.62 |
| 108260406 | LOC108260406 | 1.09  | 1.39  | 1.24  | 1.79  | 1.60  |
| 108260432 | tbx3         | 1.27  | 0.96  | 0.59  | 1.03  | 0.79  |
| 108257425 | dnmt3a       | 0.79  | 1.04  | 0.52  | 1.21  | 1.00  |
| 108257649 | LOC108257649 | 0.61  | 0.20  | 0.63  | 1.35  | 1.04  |
| 108260694 | clta         | 1.51  | 1.15  | 0.32  | 0.71  | 0.83  |
| 108260899 | LOC108260899 | -1.69 | -1.06 | -0.93 | -1.18 | -1.82 |
| 108260488 | LOC108260488 | -0.96 | -0.54 | -1.05 | -0.65 | -1.03 |
| 108260799 | cpe          | 1.84  | 1.22  | 0.56  | 0.03  | 0.38  |
| 108260792 | LOC108260792 | -0.60 | 0.02  | 0.97  | 2.23  | 2.61  |
| 108260482 | LOC108260482 | 0.18  | 0.51  | 1.48  | 1.87  | 0.76  |
| 108260940 | LOC108260940 | -0.25 | -0.84 | -0.83 | -1.09 | -1.05 |
| 108260946 | LOC108260946 | 0.37  | -0.56 | 1.04  | -0.13 | -1.74 |
| 108260665 | LOC108260665 | 0.68  | 1.72  | 0.39  | 1.55  | 1.76  |
| 108260658 | dctpp1       | -0.03 | -0.46 | -0.86 | -1.02 | -1.07 |
| 108260866 | pld5         | -0.07 | -0.24 | -0.76 | -1.03 | -1.37 |
| 108260586 | LOC108260586 | 1.63  | 1.24  | 0.39  | 0.68  | 0.33  |
| 108260495 | LOC108260495 | -1.17 | -0.30 | 0.15  | -0.01 | 1.15  |
| 108260625 | LOC108260625 | -0.20 | 0.01  | 1.02  | 1.27  | 0.67  |
| 108260627 | LOC108260627 | -0.52 | -1.06 | -0.88 | -0.76 | -2.47 |
| 108260621 | LOC108260621 | -0.95 | -1.19 | -0.42 | -0.09 | -1.36 |
| 108260490 | map9         | -1.12 | -1.08 | -0.95 | -0.44 | -0.46 |
| 108261057 | mpz          | 1.47  | 1.14  | 0.33  | 0.66  | 0.54  |
| 108261130 | col6a3       | 1.18  | 0.73  | 0.44  | 0.86  | 1.15  |
| 108261166 | LOC108261166 | 1.46  | 1.40  | 1.85  | 1.11  | 0.17  |
| 108261249 | LOC108261249 | -1.23 | -1.02 | -0.56 | -0.20 | -0.44 |
| 108261259 | LOC108261259 | -1.10 | -0.75 | 0.27  | -0.25 | -1.27 |
| 108261347 | LOC108261347 | 1.46  | 0.64  | 0.06  | -0.15 | -1.21 |
| 108261400 | LOC108261400 | 2.33  | 2.47  | 2.92  | 2.68  | 2.05  |
| 108261410 | LOC108261410 | 1.23  | 0.61  | 1.37  | 0.10  | 0.41  |
| 108261434 | LOC108261434 | 2.28  | 1.56  | 1.30  | 2.01  | 1.53  |
| 108255307 | LOC108255307 | -0.79 | -0.11 | 0.95  | 1.95  | 3.52  |

|           |              |       |       |       |       |       |
|-----------|--------------|-------|-------|-------|-------|-------|
| 108261469 | LOC108261469 | -1.05 | -1.21 | -0.70 | -0.38 | -0.49 |
| 108261484 | LOC108261484 | -1.37 | -0.73 | 0.38  | 1.21  | 0.55  |
| 108261517 | LOC108261517 | -1.39 | -1.00 | -0.30 | -0.42 | -0.56 |
| 108261612 | LOC108261612 | 2.01  | -0.39 | 1.70  | 3.03  | 4.86  |
| 108261613 | LOC108261613 | -0.39 | -0.63 | -0.83 | -1.04 | -1.26 |
| 108261623 | LOC108261623 | -1.04 | 0.99  | 0.85  | -0.04 | 1.22  |
| 108261635 | LOC108261635 | 0.56  | 1.47  | 1.72  | 1.08  | 0.97  |
| 108261652 | LOC108261652 | 0.10  | 0.14  | 1.54  | 3.13  | 2.08  |
| 108261660 | LOC108261660 | 0.19  | 0.56  | 1.54  | 1.14  | 0.14  |
| 108261668 | LOC108261668 | -1.82 | -1.19 | 0.00  | 0.68  | 0.44  |
| 108261677 | LOC108261677 | -0.07 | 0.74  | 0.47  | 1.63  | 1.20  |
| 108261682 | LOC108261682 | -0.12 | -0.19 | 0.14  | -1.18 | -1.52 |
| 108261694 | LOC108261694 | 0.72  | 0.82  | 1.04  | 1.14  | 0.60  |
| 108275463 | LOC108275463 | 1.26  | 0.86  | 0.60  | 1.11  | 0.99  |
| 108261781 | LOC108261781 | -1.84 | -2.32 | -0.33 | -0.87 | -0.45 |
| 108261809 | LOC108261809 | -2.23 | -0.84 | -0.85 | -0.74 | -1.19 |
| 108261848 | LOC108261848 | 0.91  | 0.73  | 1.04  | 1.37  | 0.81  |
| 108261884 | LOC108261884 | -1.09 | -0.44 | -0.40 | -0.97 | -1.20 |
| 108261916 | LOC108261916 | -1.33 | -2.94 | 0.17  | 2.10  | 3.29  |
| 108261920 | LOC108261920 | -0.98 | 0.29  | 1.45  | 1.11  | -0.03 |
| 108261944 | LOC108261944 | -1.38 | -1.09 | -0.72 | -0.63 | -1.21 |
| 108261980 | LOC108261980 | -1.62 | -1.24 | -0.37 | 0.27  | -0.02 |
| 108262001 | LOC108262001 | 1.31  | 1.42  | 1.94  | 1.77  | 1.46  |
| 108262008 | LOC108262008 | 0.66  | 1.05  | 0.77  | 1.21  | 0.98  |
| 108262018 | LOC108262018 | 0.99  | 1.11  | 2.14  | 2.59  | 1.37  |
| 108262097 | LOC108262097 | 1.66  | 0.88  | 1.09  | 1.24  | 1.58  |
| 108262164 | LOC108262164 | 1.03  | 1.51  | 1.30  | 1.47  | 0.97  |
| 108262189 | LOC108262189 | 0.57  | 0.50  | 1.16  | 1.03  | 0.70  |
| 108263800 | LOC108263800 | 0.39  | 0.64  | 0.88  | 1.12  | 1.02  |
| 108262314 | LOC108262314 | 1.26  | 1.83  | 1.48  | -0.44 | 0.26  |
| 108262328 | LOC108262328 | -0.01 | 0.96  | 0.92  | 2.78  | 2.52  |
| 108262339 | LOC108262339 | 0.41  | 0.18  | 0.26  | 1.23  | 1.56  |
| 108262451 | LOC108262451 | -1.06 | -0.59 | 1.03  | 0.77  | -0.56 |
| 108262475 | LOC108262475 | -0.81 | -1.04 | -0.96 | -0.84 | -1.28 |
| 108262481 | LOC108262481 | 0.93  | 1.01  | 0.58  | 1.26  | 0.67  |
| 108262495 | LOC108262495 | -0.86 | -0.97 | -1.03 | -1.69 | -0.54 |
| 108263253 | LOC108263253 | 0.82  | 0.58  | 0.53  | 1.44  | 1.73  |
| 108263256 | sod3         | 2.33  | 1.54  | 0.16  | 1.11  | 0.77  |
| 108262539 | LOC108262539 | -0.61 | -1.94 | -1.20 | -0.76 | -0.10 |
| 108262542 | LOC108262542 | 0.32  | 0.55  | 1.18  | 1.48  | 0.67  |
| 108263713 | LOC108263713 | 0.88  | 0.57  | 0.99  | -1.34 | -1.40 |
| 108262669 | LOC108262669 | 0.83  | 0.39  | 0.34  | 1.91  | 2.22  |
| 108262680 | LOC108262680 | 0.73  | 1.04  | 1.10  | 0.82  | 0.96  |
| 108263016 | LOC108263016 | -0.32 | -0.27 | -0.79 | -1.07 | -1.20 |
| 804885    | COX3         | -1.16 | -0.70 | -0.69 | -1.01 | -0.92 |

|           |              |       |       |       |       |       |
|-----------|--------------|-------|-------|-------|-------|-------|
| 804878    | ND3          | -0.88 | -0.75 | -0.78 | -1.26 | -1.06 |
| 804882    | ND4          | -1.30 | -0.89 | -0.94 | -1.21 | -0.98 |
| 804886    | ND6          | -1.41 | -0.87 | -0.73 | -1.05 | -0.76 |
| 108263010 | gpm6a        | 1.81  | 1.17  | 0.09  | 0.57  | 0.73  |
| 108263855 | tnip2        | -1.43 | -1.06 | -0.83 | -0.80 | -0.73 |
| 108263769 | LOC108263769 | 1.05  | 0.76  | 1.32  | 1.01  | 1.30  |
| 108263506 | LOC108263506 | -0.35 | -0.84 | -0.60 | -1.43 | -2.43 |
| 108263532 | LOC108263532 | 1.34  | 1.17  | 0.57  | 0.90  | 0.80  |
| 108263570 | rgs12        | 0.86  | 1.08  | 1.17  | 0.94  | 0.87  |
| 108262784 | slc43a3      | -0.53 | 0.14  | 0.02  | -1.04 | -1.16 |
| 108263663 | tspan15      | 1.18  | 1.08  | 0.63  | 0.67  | 0.71  |
| 108263641 | LOC108263641 | 1.60  | 0.96  | 0.76  | 1.03  | 0.90  |
| 100304743 | pcbd1        | 1.27  | 1.04  | -0.30 | 0.33  | 0.32  |
| 108263501 | asrgl1       | 1.37  | 1.29  | 0.18  | -0.31 | -0.38 |
| 108256267 | LOC108256267 | -1.38 | -1.09 | -0.77 | -0.46 | -0.48 |
| 108263377 | LOC108263377 | 1.01  | 0.31  | 0.56  | 0.52  | 1.01  |
| 108263632 | crtac1       | 1.58  | 0.53  | 0.50  | 0.99  | 1.10  |
| 108263398 | c3h10orf11   | 0.62  | 1.17  | 0.90  | 1.10  | 0.94  |
| 108263543 | LOC108263543 | 1.18  | 0.24  | 0.73  | 1.29  | -0.44 |
| 108263823 | alox5        | -0.61 | -0.58 | 0.07  | 1.33  | 2.52  |
| 108265499 | LOC108265499 | 1.54  | 1.01  | 0.56  | 0.20  | 0.26  |
| 108263294 | slc3a1       | -0.24 | -0.04 | -1.06 | 1.06  | 0.38  |
| 108263845 | rab23        | 1.32  | 0.89  | 0.71  | 1.01  | 0.87  |
| 100528358 | perp         | 1.63  | 1.10  | 0.52  | 0.66  | 0.77  |
| 108263225 | LOC108263225 | 1.51  | 1.09  | 0.85  | -0.28 | 0.33  |
| 108263134 | angpt2       | -1.17 | -0.97 | -0.74 | -1.16 | -0.99 |
| 108263035 | LOC108263035 | -1.60 | -0.85 | -1.02 | -0.88 | -0.39 |
| 108263842 | dact2        | 1.66  | 0.45  | 0.83  | 1.21  | 0.53  |
| 108263246 | wdr89        | -1.04 | -0.84 | -0.69 | -0.97 | -1.13 |
| 108269281 | LOC108269281 | -0.57 | -0.44 | -0.62 | -1.07 | -1.05 |
| 108263330 | rdh11        | -0.41 | -0.89 | -0.70 | -1.30 | -1.15 |
| 108263622 | LOC108263622 | 1.87  | 0.86  | 0.76  | 1.11  | 1.72  |
| 108263381 | pdss2        | -1.23 | -1.00 | -0.34 | -1.13 | -0.92 |
| 108263084 | rtn1         | 1.49  | 1.00  | 0.94  | 1.32  | 0.91  |
| 108262922 | LOC108262922 | 0.92  | 0.61  | 0.93  | 1.73  | 1.52  |
| 108263001 | LOC108263001 | -1.15 | -0.59 | -0.67 | -1.34 | -0.74 |
| 108264153 | ppp1r37      | 1.27  | 0.95  | 0.89  | 1.07  | 0.71  |
| 108264170 | LOC108264170 | -1.01 | -0.72 | 0.28  | 2.28  | 3.36  |
| 108263914 | LOC108263914 | -0.21 | -0.76 | -1.75 | -1.12 | -0.15 |
| 108264293 | LOC108264293 | -1.54 | -1.07 | -0.94 | -0.69 | -0.35 |
| 108264811 | LOC108264811 | 1.39  | 0.94  | 0.97  | 1.28  | 0.93  |
| 108264061 | LOC108264061 | -0.93 | -0.11 | -0.43 | -1.42 | -1.99 |
| 108266079 | LOC108266079 | -1.08 | -0.50 | -0.39 | -1.05 | -0.43 |
| 100528386 | dcun1d5      | -1.20 | -0.86 | -0.94 | -1.02 | -0.90 |
| 108264402 | LOC108264402 | -1.22 | -0.80 | -0.18 | -0.84 | -1.17 |

|           |              |       |       |       |       |       |
|-----------|--------------|-------|-------|-------|-------|-------|
| 108264551 | hipk2        | 0.36  | 0.70  | 1.32  | 1.18  | 0.63  |
| 108272131 | mboat1       | -0.74 | -0.89 | -1.05 | -1.26 | -0.81 |
| 108264458 | LOC108264458 | 1.08  | 0.94  | 0.85  | 1.09  | 0.73  |
| 108263978 | LOC108263978 | 3.14  | 1.76  | 0.31  | 0.89  | 0.73  |
| 108264023 | LOC108264023 | -1.72 | -1.01 | -0.70 | -1.09 | -1.32 |
| 108264418 | LOC108264418 | -1.35 | -0.79 | -0.56 | -1.09 | -0.91 |
| 108264363 | tsnaxip1     | -1.19 | -1.29 | -0.96 | -0.79 | -0.95 |
| 108264364 | ranbp10      | 0.99  | 0.82  | 1.07  | 1.20  | 0.87  |
| 108264362 | LOC108264362 | -1.65 | -0.76 | -1.30 | 3.55  | 4.58  |
| 108264339 | LOC108264339 | 1.09  | 0.14  | 1.52  | 0.82  | 1.19  |
| 108264325 | larp6        | 0.19  | 0.10  | 0.39  | 1.08  | 1.64  |
| 108264196 | LOC108264196 | -0.47 | -0.65 | -1.86 | -1.84 | -0.80 |
| 108264089 | LOC108264089 | 0.36  | 0.36  | 1.18  | 1.03  | 0.91  |
| 108264313 | ccn11        | -1.59 | -0.87 | -0.98 | -1.14 | -0.81 |
| 108264506 | c4h15orf48   | 0.01  | 0.58  | 0.70  | 1.19  | 2.14  |
| 108264475 | secisbp21    | 0.57  | 0.81  | 0.90  | 1.42  | 1.36  |
| 108263728 | LOC108263728 | -3.53 | -0.90 | 1.07  | 0.82  | 0.78  |
| 108264484 | mapk6        | 0.99  | 0.89  | 0.84  | 1.32  | 1.38  |
| 108264517 | LOC108264517 | 1.21  | 1.04  | 0.56  | 0.56  | 0.16  |
| 108272958 | clstn3       | -1.00 | -1.33 | -1.30 | -0.62 | -0.18 |
| 108264494 | homer2       | 1.58  | 1.11  | 0.66  | 0.87  | 0.46  |
| 108264482 | fsd2         | -1.90 | -0.79 | -0.60 | -0.85 | -1.04 |
| 108264514 | LOC108264514 | 0.16  | 0.33  | 1.04  | 0.00  | 1.02  |
| 108264520 | LOC108264520 | 0.83  | 0.98  | 1.00  | 1.03  | 0.44  |
| 108264148 | LOC108264148 | -1.60 | -0.82 | 0.24  | -0.77 | -1.07 |
| 108264531 | LOC108264531 | 2.54  | 1.79  | 1.70  | 1.50  | 2.12  |
| 108264287 | slc24a5      | -0.71 | -0.34 | -1.90 | -1.69 | -0.98 |
| 108265590 | epgn         | -1.47 | 0.31  | -0.95 | -1.32 | -0.13 |
| 108264927 | LOC108264927 | 0.61  | 0.05  | 0.98  | 1.73  | 1.27  |
| 108264942 | LOC108264942 | -1.82 | -1.32 | -0.58 | -0.88 | -0.94 |
| 108265152 | LOC108265152 | 0.31  | 0.40  | 0.74  | 1.04  | 1.15  |
| 108265440 | LOC108265440 | 0.30  | 0.45  | 0.79  | 1.23  | 1.21  |
| 108265442 | LOC108265442 | 0.03  | 0.57  | 0.62  | 1.03  | 1.29  |
| 108265071 | myl7         | -1.68 | -2.27 | -0.90 | -0.25 | -0.40 |
| 108265607 | ccdc92       | -1.25 | -1.61 | -0.45 | -0.68 | -0.04 |
| 108265864 | LOC108265864 | -1.44 | -1.19 | -0.67 | -0.45 | -0.99 |
| 108265213 | LOC108265213 | 1.35  | 0.93  | 1.64  | -0.05 | -0.85 |
| 108265748 | egr3         | -1.42 | 1.23  | -0.68 | -0.33 | 0.04  |
| 108265398 | slc25a37     | 0.81  | 1.14  | 0.85  | 1.20  | 0.40  |
| 108265898 | plp2         | 1.74  | 1.08  | 0.42  | 0.43  | 0.25  |
| 108265996 | rasef        | 0.33  | 1.15  | 0.81  | 0.93  | 1.56  |
| 108265504 | LOC108265504 | -1.17 | -0.78 | -0.58 | -1.00 | -1.45 |
| 108265056 | angptl7      | 1.80  | 0.16  | -0.33 | 0.28  | 1.17  |
| 108265001 | cldn5        | 3.43  | 2.32  | 0.78  | 1.33  | 1.40  |
| 108265901 | cdo1         | 1.58  | 0.47  | 0.78  | 1.02  | 0.75  |

|           |              |       |       |       |       |       |
|-----------|--------------|-------|-------|-------|-------|-------|
| 108265819 | LOC108265819 | 0.76  | 0.71  | 0.95  | 1.08  | 1.19  |
| 108273246 | has2         | 1.26  | 0.30  | -0.56 | -1.35 | -0.32 |
| 108265433 | ahcy1l       | 0.20  | 0.36  | 0.32  | 1.37  | 1.66  |
| 108265687 | LOC108265687 | -3.65 | -1.73 | 0.98  | -0.50 | -0.62 |
| 108265421 | LOC108265421 | -1.10 | 0.19  | -1.03 | -0.87 | 0.07  |
| 108272311 | LOC108272311 | -0.57 | -0.51 | -1.32 | -0.69 | -1.28 |
| 108265519 | pde4d        | 0.55  | 1.11  | 0.96  | 1.08  | 0.83  |
| 108267218 | LOC108267218 | 0.36  | 0.35  | 1.08  | 1.38  | 0.75  |
| 108265451 | LOC108265451 | -1.76 | -1.04 | 0.76  | 0.90  | 0.29  |
| 108265862 | LOC108265862 | -0.82 | -0.74 | -0.70 | -1.09 | -1.05 |
| 108264965 | LOC108264965 | -1.51 | -1.03 | -0.51 | -0.52 | -0.20 |
| 108267330 | LOC108267330 | -1.44 | -1.05 | 0.29  | 0.48  | 0.58  |
| 108265198 | LOC108265198 | 1.66  | 1.05  | 0.50  | 0.89  | 0.70  |
| 108265205 | LOC108265205 | 1.57  | 1.40  | 0.90  | 0.89  | 0.74  |
| 108266016 | LOC108266016 | -1.07 | -0.10 | -0.11 | -0.20 | -1.34 |
| 108266325 | ehhadh       | -1.06 | -0.44 | -1.01 | -0.98 | -0.84 |
| 108266082 | LOC108266082 | 1.04  | 0.49  | 0.49  | 1.01  | 0.44  |
| 100528339 | dal1b        | 1.48  | 1.13  | 0.59  | 0.54  | 0.55  |
| 100305017 | LOC100305017 | 2.08  | 1.27  | 0.90  | 0.75  | 0.51  |
| 100528543 | dbi          | 1.80  | 1.09  | 0.53  | 0.41  | 0.15  |
| 108266835 | acod1        | 1.84  | 0.84  | 2.02  | 3.03  | 2.51  |
| 108266135 | LOC108266135 | 0.09  | -0.54 | 0.10  | 2.96  | 3.09  |
| 108266750 | tex30        | -1.29 | -0.68 | -0.60 | -1.03 | -0.72 |
| 108266107 | gpr156       | 0.59  | 0.61  | 1.06  | 0.98  | 1.07  |
| 108266945 | LOC108266945 | 1.18  | 1.14  | 1.60  | 1.49  | 1.72  |
| 108266567 | LOC108266567 | 1.25  | 0.85  | 0.78  | 1.03  | 0.82  |
| 108266130 | LOC108266130 | -0.75 | -1.02 | -1.02 | -0.99 | -0.53 |
| 108266128 | LOC108266128 | 1.55  | 0.77  | 1.01  | 1.32  | 0.55  |
| 108266090 | lypd6b       | -0.33 | -0.60 | -0.45 | -1.15 | -1.06 |
| 108266701 | LOC108266701 | 1.08  | 0.57  | 0.42  | 0.67  | 1.33  |
| 108266376 | sdpr         | 1.50  | 1.05  | 0.63  | 0.59  | 0.42  |
| 108266075 | ppp1r1c      | 2.48  | 1.48  | 0.27  | 0.79  | 0.54  |
| 108266810 | c6h2orf88    | 1.38  | 0.95  | 0.85  | 1.05  | 0.67  |
| 108266559 | LOC108266559 | -0.36 | 2.34  | 0.32  | 0.37  | 1.46  |
| 108266319 | LOC108266319 | -1.39 | -0.89 | -0.20 | -0.92 | -1.92 |
| 108266832 | LOC108266832 | 1.74  | 1.20  | 0.25  | 0.66  | 0.69  |
| 100335031 | cxcr4        | -1.26 | -0.26 | -1.26 | 0.09  | 0.89  |
| 108266359 | LOC108266359 | -1.25 | -0.96 | -0.63 | -1.01 | -0.84 |
| 108266383 | LOC108266383 | -0.58 | -0.66 | -0.46 | -1.01 | -1.17 |
| 108272342 | gpatch4      | -0.43 | -1.08 | -0.80 | -0.85 | -1.06 |
| 108267394 | LOC108267394 | 0.43  | 1.38  | 1.66  | 0.59  | 0.17  |
| 108267628 | LOC108267628 | 1.04  | 0.91  | 0.75  | 1.59  | 0.65  |
| 100528222 | tnfaip8l2    | 1.75  | 0.91  | 0.57  | 1.00  | 0.42  |
| 108267710 | LOC108267710 | -0.76 | -0.66 | 0.56  | 1.40  | 1.03  |
| 108268301 | LOC108268301 | 0.26  | -0.12 | 0.79  | 1.41  | 1.35  |



|           |              |       |       |       |       |       |
|-----------|--------------|-------|-------|-------|-------|-------|
| 108267475 | LOC108267475 | -0.87 | -1.00 | -1.22 | -1.02 | -0.37 |
| 108268041 | LOC108268041 | -1.55 | -0.72 | -0.46 | -0.67 | -1.18 |
| 108267808 | LOC108267808 | -0.16 | -0.02 | 0.70  | 1.46  | 2.41  |
| 108267754 | LOC108267754 | 2.00  | 1.52  | 0.85  | 0.99  | 0.68  |
| 108268503 | LOC108268503 | 0.89  | 0.72  | 1.08  | 1.28  | 0.76  |
| 108267065 | bank1        | -0.17 | 0.37  | 0.90  | 1.94  | 2.88  |
| 108267264 | LOC108267264 | -3.48 | -1.94 | -0.91 | -0.55 | -0.27 |
| 108267673 | LOC108267673 | 1.21  | 0.98  | 0.43  | 0.61  | 1.12  |
| 108268326 | LOC108268326 | -1.01 | -0.25 | 0.37  | 0.87  | 1.14  |
| 100528255 | cck          | 0.70  | 0.41  | -0.31 | 1.43  | 1.65  |
| 108267666 | rcor2        | -1.18 | -0.90 | -0.70 | -1.01 | -0.96 |
| 108267120 | LOC108267120 | -0.86 | 0.83  | -1.40 | -1.40 | 0.40  |
| 108268337 | gal3st4      | 1.49  | 0.97  | 0.62  | 1.15  | 0.16  |
| 108267931 | LOC108267931 | -1.45 | -1.00 | -0.39 | -0.31 | -1.20 |
| 108267934 | mmp14        | 1.58  | 1.00  | 0.88  | 0.86  | 0.88  |
| 108267965 | LOC108267965 | -1.17 | -0.52 | -0.39 | -0.88 | -1.17 |
| 108267969 | LOC108267969 | 0.17  | 0.86  | 1.36  | 1.03  | 0.77  |
| 108267975 | LOC108267975 | -0.26 | 0.17  | 0.83  | 1.25  | 1.01  |
| 108267989 | LOC108267989 | -0.07 | 0.11  | 0.94  | 3.38  | 2.61  |
| 108273110 | id4          | 1.56  | 0.84  | 1.12  | 0.66  | 0.58  |
| 108267909 | LOC108267909 | 1.21  | 1.00  | 0.33  | 0.12  | 0.30  |
| 108267503 | LOC108267503 | -1.68 | -1.25 | -0.87 | -0.72 | -0.48 |
| 108267300 | LOC108267300 | -0.99 | -1.01 | -0.66 | -1.26 | -1.14 |
| 108267280 | kcnj10       | 1.13  | 1.01  | 0.28  | 0.34  | 0.20  |
| 108267308 | lama3        | -0.67 | -0.02 | -1.02 | -1.18 | -0.22 |
| 108269046 | LOC108269046 | -1.34 | -0.51 | -1.02 | -0.58 | 0.34  |
| 108268315 | LOC108268315 | 2.26  | 1.28  | 0.38  | 0.80  | 0.61  |
| 108268210 | ube3c        | 1.05  | 0.90  | 0.97  | 1.18  | 0.68  |
| 108268228 | ssx2ip       | -1.41 | -1.03 | -0.92 | -0.65 | -0.84 |
| 108268268 | LOC108268268 | -1.06 | -1.45 | -0.43 | -0.30 | -0.19 |
| 108267087 | LOC108267087 | 1.48  | 0.83  | 1.29  | 1.08  | 0.44  |
| 108267098 | LOC108267098 | 0.93  | 0.58  | 1.08  | 1.32  | 0.03  |
| 108267094 | LOC108267094 | 1.43  | 1.01  | 0.32  | 0.50  | 0.19  |
| 108268520 | LOC108268520 | 1.11  | 1.06  | 0.62  | 0.87  | 0.53  |
| 108268577 | ltc4s        | -0.63 | -0.46 | 0.08  | 1.50  | 2.81  |
| 108269292 | LOC108269292 | 0.96  | 0.76  | 0.62  | 1.28  | 1.26  |
| 100528780 | cysltr1      | 0.27  | 0.09  | 0.50  | 1.18  | 1.89  |
| 108271289 | lin28b       | 0.50  | 1.33  | 1.34  | 0.78  | 0.48  |
| 108269123 | LOC108269123 | 0.78  | 0.94  | 1.18  | 1.39  | 0.88  |
| 108269141 | LOC108269141 | -1.47 | -0.77 | -0.95 | -1.04 | -0.54 |
| 108269012 | lamp2        | 1.20  | 0.92  | 0.60  | 1.30  | 0.67  |
| 108268889 | gdpd2        | -0.39 | -0.47 | -0.65 | -1.05 | -1.14 |
| 108269062 | LOC108269062 | 1.24  | 0.82  | 0.81  | 1.04  | 0.55  |
| 108268941 | arhgef6      | 0.96  | 0.96  | 1.03  | 0.94  | 1.12  |
| 108268866 | nkrf         | 1.28  | 0.80  | 0.74  | 1.23  | 0.74  |

|           |              |       |       |       |       |       |
|-----------|--------------|-------|-------|-------|-------|-------|
| 108269337 | slc25a48     | -1.17 | -0.23 | -0.76 | -1.62 | -0.95 |
| 108269150 | LOC108269150 | 0.89  | 0.90  | 0.90  | 1.14  | 1.09  |
| 108269054 | ints5        | 1.38  | 0.92  | 0.72  | 1.03  | 0.63  |
| 108269159 | tmem60       | 1.19  | 0.87  | 1.03  | 0.98  | 0.55  |
| 100526828 | gnai1        | -0.56 | -1.12 | -1.42 | -0.82 | -0.74 |
| 108269398 | LOC108269398 | -0.48 | -0.28 | -0.66 | -1.33 | -1.38 |
| 108269050 | LOC108269050 | -1.40 | -0.93 | -1.00 | -1.03 | -1.00 |
| 108268701 | immp2l       | 1.61  | 0.69  | 0.58  | 1.00  | 0.53  |
| 108269172 | far2         | 1.71  | 0.76  | 0.57  | 1.13  | 0.64  |
| 108269308 | LOC108269308 | 1.05  | -0.02 | -0.09 | -1.35 | -0.19 |
| 108268537 | LOC108268537 | 0.81  | -0.18 | 0.41  | -1.52 | -1.06 |
| 108269224 | mmp15        | 1.32  | 0.63  | 0.09  | 0.56  | 1.10  |
| 108268808 | LOC108268808 | -0.67 | -0.50 | -0.54 | -1.05 | -1.60 |
| 108268810 | LOC108268810 | -0.22 | -0.10 | 0.46  | 1.53  | 1.17  |
| 108268689 | c8h11orf31   | 1.41  | 1.22  | 0.78  | 0.69  | 0.78  |
| 108269183 | LOC108269183 | 0.04  | 0.76  | 0.68  | 1.04  | 1.48  |
| 108268874 | LOC108268874 | -1.08 | -0.75 | -1.06 | -0.98 | -0.36 |
| 108278937 | pou3f1       | 1.96  | 1.13  | 0.41  | 0.73  | 1.00  |
| 108268767 | LOC108268767 | 0.37  | 1.45  | 2.26  | 0.54  | 2.22  |
| 108269261 | slc7a11      | -0.79 | -0.87 | -1.51 | -1.62 | -0.92 |
| 108269254 | pdgfc        | 0.79  | 1.41  | 0.93  | 1.07  | 0.85  |
| 108268928 | LOC108268928 | 0.54  | 0.56  | 1.18  | 0.25  | 1.21  |
| 108269818 | LOC108269818 | 1.18  | 0.81  | 0.93  | 1.36  | 0.93  |
| 108270089 | LOC108270089 | 1.81  | 1.23  | 0.89  | 0.70  | 0.27  |
| 108269776 | LOC108269776 | -1.45 | -1.23 | -0.98 | -0.88 | -0.61 |
| 108269981 | kcnk13       | -1.05 | -0.69 | -0.86 | -0.70 | -1.16 |
| 108269565 | LOC108269565 | 0.74  | 0.55  | 0.64  | 1.35  | 1.45  |
| 108269704 | LOC108269704 | -0.35 | -0.62 | -0.78 | -1.27 | -1.30 |
| 108270296 | kiaa1143     | 1.13  | 0.66  | 0.97  | 1.29  | 0.80  |
| 100528304 | ebag9        | 1.45  | 1.02  | 0.56  | 0.93  | 0.74  |
| 108270404 | ect2l        | -0.55 | -0.79 | -0.85 | -1.12 | -1.11 |
| 108270383 | bmf          | 1.42  | 1.18  | 0.93  | 1.69  | 0.72  |
| 108270370 | LOC108270370 | -0.13 | 1.64  | -0.61 | -0.84 | 1.16  |
| 108270384 | fsip1        | -0.77 | -0.10 | -1.09 | -1.08 | 0.17  |
| 108269638 | LOC108269638 | -0.21 | -0.28 | -0.50 | -1.10 | -1.00 |
| 108270301 | LOC108270301 | 0.55  | 0.71  | 0.98  | 1.03  | 1.14  |
| 108269727 | LOC108269727 | 1.58  | 1.31  | -1.54 | 0.52  | 0.46  |
| 108269442 | LOC108269442 | -2.17 | -0.69 | -0.88 | -0.52 | -1.14 |
| 108269483 | LOC108269483 | -1.08 | 1.72  | -0.64 | -0.46 | 0.53  |
| 108270356 | cd93         | 1.52  | 0.18  | 0.40  | 0.47  | 1.07  |
| 108270100 | LOC108270100 | 0.94  | 1.02  | 1.43  | 1.33  | 0.64  |
| 100305074 | LOC100305074 | -1.17 | 0.40  | 0.45  | 1.18  | 1.62  |
| 108270448 | dact1        | 1.20  | 0.08  | 0.74  | 1.30  | 0.55  |
| 108269476 | LOC108269476 | 1.69  | 1.09  | 0.43  | 0.42  | 0.39  |
| 108270453 | sntg2        | -1.66 | -1.04 | -0.57 | -0.01 | 0.52  |

|           |              |       |       |       |       |       |
|-----------|--------------|-------|-------|-------|-------|-------|
| 108270130 | tgfb3        | 1.68  | 0.53  | 0.14  | 0.36  | 1.01  |
| 108269506 | prox2        | 0.36  | 1.30  | 1.39  | 0.67  | 0.25  |
| 108269971 | odc1         | -0.94 | 0.70  | -1.26 | -1.21 | -0.32 |
| 108270190 | LOC108270190 | -1.25 | -0.65 | -0.62 | -0.67 | -1.24 |
| 108270425 | LOC108270425 | -0.35 | 0.63  | 0.98  | 1.04  | 1.08  |
| 108269856 | LOC108269856 | -2.08 | -1.13 | -0.41 | 0.00  | -0.23 |
| 108270340 | msra         | 1.45  | 1.16  | 0.78  | 0.98  | 1.00  |
| 108270276 | LOC108270276 | -1.37 | -0.78 | -0.96 | -1.00 | -0.65 |
| 108270048 | jade1        | 1.03  | 1.01  | 0.66  | 0.66  | 0.45  |
| 108270284 | LOC108270284 | -1.62 | -1.18 | -0.86 | -0.80 | -0.82 |
| 108269832 | LOC108269832 | -0.55 | 0.38  | 1.03  | 2.04  | 0.26  |
| 108269831 | LOC108269831 | -1.38 | -0.93 | -0.47 | 0.30  | -1.04 |
| 108270984 | LOC108270984 | -2.16 | -1.72 | -1.07 | -1.44 | -1.91 |
| 100528841 | cln8         | 1.05  | 1.30  | 0.95  | 0.76  | 1.07  |
| 108270267 | LOC108270267 | -0.87 | -1.16 | -1.33 | -1.34 | -0.54 |
| 108270271 | LOC108270271 | -1.13 | -1.36 | -0.94 | -1.10 | -0.84 |
| 108270196 | LOC108270196 | 1.87  | 1.60  | 0.88  | 1.06  | 0.83  |
| 108269523 | LOC108269523 | -0.20 | -0.08 | 1.30  | 1.72  | 2.74  |
| 108269806 | mrps5        | -1.09 | -0.90 | -0.87 | -1.16 | -1.12 |
| 108271180 | LOC108271180 | -0.87 | -1.40 | -0.81 | -1.43 | -1.40 |
| 108270982 | pmfbp1       | -1.30 | -0.63 | -1.16 | -1.15 | -0.42 |
| 108270992 | LOC108270992 | 1.63  | 1.58  | 0.85  | 1.27  | 0.71  |
| 108271057 | LOC108271057 | -1.24 | -1.06 | -0.86 | -1.16 | -0.96 |
| 108271069 | LOC108271069 | 0.16  | 0.10  | 1.19  | 2.62  | 4.20  |
| 108270973 | LOC108270973 | -1.79 | -1.13 | -0.82 | -0.94 | -1.16 |
| 108270616 | LOC108270616 | -0.63 | -1.49 | -0.79 | -1.60 | -1.17 |
| 108271327 | orc2         | -0.49 | -1.18 | -1.28 | -1.13 | -0.90 |
| 108271087 | LOC108271087 | 1.25  | 1.03  | 0.83  | 1.24  | 0.83  |
| 108271418 | mex3b        | 1.27  | 0.87  | 1.12  | 1.20  | 0.76  |
| 108271223 | cep19        | 1.26  | 1.28  | 1.35  | 0.30  | 0.59  |
| 108271185 | tnfaip8l1    | 1.22  | 0.91  | 0.79  | 1.02  | 1.15  |
| 108270899 | LOC108270899 | -1.45 | -1.32 | -0.32 | -0.76 | -1.65 |
| 108271114 | LOC108271114 | 1.26  | 0.80  | 0.73  | 1.04  | 1.01  |
| 108271022 | LOC108271022 | -1.71 | 0.07  | -1.55 | -1.59 | -0.27 |
| 108271704 | tgfbr1       | -1.23 | -1.02 | -0.87 | -1.14 | -0.86 |
| 108270963 | LOC108270963 | 1.26  | 1.18  | 1.02  | 0.97  | 0.42  |
| 108271414 | reep6        | 0.25  | 1.17  | 0.38  | 1.60  | 1.43  |
| 108271379 | slc39a3      | 1.38  | 1.01  | 0.93  | 1.23  | 0.65  |
| 108271402 | fam43a       | 1.31  | 0.63  | 1.17  | 1.50  | 0.67  |
| 108270728 | LOC108270728 | -1.32 | -1.26 | -0.55 | -0.72 | -1.11 |
| 108270789 | LOC108270789 | -0.48 | -0.08 | 1.69  | 2.22  | 2.91  |
| 108270774 | zrsr2        | -1.13 | -1.00 | -0.72 | -1.07 | -1.03 |
| 108270673 | helz2        | -0.89 | -1.48 | -0.96 | -1.57 | -1.70 |
| 108271166 | LOC108271166 | 2.81  | 2.33  | 1.34  | -0.61 | -0.78 |
| 108271606 | LOC108271606 | 1.41  | 0.98  | 1.30  | 1.63  | 1.00  |

|           |              |       |       |       |       |       |
|-----------|--------------|-------|-------|-------|-------|-------|
| 108272228 | LOC108272228 | -0.07 | 0.13  | 1.39  | 1.99  | 2.05  |
| 108272221 | LOC108272221 | 1.29  | 0.99  | 1.31  | 1.78  | 1.08  |
| 108271862 | chst7        | 1.11  | 1.38  | 0.40  | 0.92  | 1.26  |
| 108271516 | LOC108271516 | 0.70  | 0.49  | 1.12  | 1.43  | 1.20  |
| 108271920 | LOC108271920 | 0.60  | 1.09  | 0.96  | 1.23  | 1.05  |
| 108271648 | LOC108271648 | -1.46 | -1.17 | -0.52 | -0.69 | -1.21 |
| 108271651 | LOC108271651 | -2.24 | -1.11 | 0.02  | -0.69 | -1.08 |
| 108271882 | uhmk1        | 1.05  | 0.98  | 1.21  | 1.21  | 0.31  |
| 108271599 | LOC108271599 | 1.42  | 1.45  | 0.67  | -1.00 | -1.99 |
| 108271773 | LOC108271773 | 1.09  | 1.08  | 0.66  | 0.96  | 1.13  |
| 108272255 | dr1          | 1.37  | 1.03  | 0.62  | 1.06  | 0.45  |
| 108271915 | tgfbr3       | 1.83  | 1.83  | 1.12  | 1.72  | 1.22  |
| 108271580 | znf326       | -2.01 | -1.40 | -1.00 | -1.09 | -1.45 |
| 108272194 | srgap3       | 0.47  | 1.14  | 1.19  | 1.20  | 0.64  |
| 100528638 | myl9         | 2.37  | 1.23  | 0.70  | 0.65  | 1.25  |
| 108272181 | chchd6       | 1.61  | 1.31  | 0.95  | 1.30  | 0.69  |
| 108272896 | myo3a        | -1.12 | -1.23 | -1.25 | -0.99 | -0.51 |
| 108271788 | LOC108271788 | 1.88  | 1.25  | 0.91  | 1.72  | 0.89  |
| 108271798 | LOC108271798 | -2.00 | -0.55 | -1.37 | -1.22 | -0.53 |
| 108271965 | c11h6orf106  | 1.31  | 1.33  | 0.75  | 1.22  | 0.90  |
| 108272291 | glyctk       | 1.79  | 1.65  | 0.37  | 1.49  | 0.74  |
| 108266496 | LOC108266496 | -1.21 | -0.97 | -0.69 | -1.05 | -1.30 |
| 108273092 | LOC108273092 | 0.98  | 0.91  | 1.27  | 1.40  | 1.27  |
| 108266768 | coll1a1      | 0.13  | 0.99  | 1.05  | 1.12  | 1.73  |
| 108271709 | LOC108271709 | 1.59  | 1.03  | 1.49  | 1.35  | 0.84  |
| 108272434 | LOC108272434 | -1.05 | -0.90 | -0.92 | -1.05 | -1.43 |
| 108273106 | LOC108273106 | -1.20 | -1.25 | -0.70 | -1.28 | -0.89 |
| 108273111 | ten1         | -1.22 | -0.67 | -1.30 | -0.96 | -1.06 |
| 108273086 | LOC108273086 | 0.91  | 1.07  | 1.21  | 1.47  | 0.77  |
| 108272403 | LOC108272403 | -1.45 | -0.63 | -0.84 | -1.46 | -1.04 |
| 100528098 | rgn          | 1.04  | 1.25  | 0.93  | 1.22  | 0.88  |
| 108273079 | LOC108273079 | 1.72  | 1.18  | 0.66  | 1.12  | 0.73  |
| 108272073 | LOC108272073 | 1.72  | 1.27  | 0.80  | 1.19  | 0.82  |
| 108272711 | crabp2       | 1.86  | 0.86  | 0.92  | 1.35  | 2.26  |
| 100528468 | agr2         | 1.48  | 1.05  | 0.75  | 0.97  | 1.14  |
| 108274928 | LOC108274928 | -1.02 | -0.78 | -0.70 | -1.33 | -1.00 |
| 108272571 | asns         | 0.09  | -0.65 | -1.22 | -1.21 | -1.12 |
| 108272654 | eepd1        | -1.16 | -0.42 | -1.23 | -1.03 | -0.47 |
| 108272851 | LOC108272851 | 1.73  | 1.31  | 0.96  | 1.04  | 0.69  |
| 108272472 | LOC108272472 | 1.36  | 1.24  | 0.94  | 1.36  | 0.93  |
| 108273012 | LOC108273012 | 2.00  | 1.35  | 1.05  | 1.48  | 0.57  |
| 100304584 | LOC100304584 | 4.58  | 2.22  | 0.95  | 1.79  | 0.95  |
| 108272494 | LOC108272494 | -2.06 | 0.95  | 2.53  | 1.04  | 1.69  |
| 108272487 | LOC108272487 | 0.40  | 0.49  | 1.23  | 1.18  | 1.27  |
| 108280447 | bcl2l12      | -1.36 | -1.16 | -0.83 | -0.97 | -1.01 |

|           |              |       |       |       |       |       |
|-----------|--------------|-------|-------|-------|-------|-------|
| 108273626 | LOC108273626 | -2.16 | -0.86 | -0.07 | -2.23 | -2.21 |
| 108273937 | LOC108273937 | -0.60 | -0.95 | -1.04 | -1.05 | -1.06 |
| 108273755 | LOC108273755 | 0.90  | 1.29  | 1.12  | 1.15  | 0.90  |
| 108273823 | LOC108273823 | 1.04  | 0.76  | 0.47  | 1.31  | 1.09  |
| 108280749 | LOC108280749 | 0.39  | 1.13  | 0.92  | 1.10  | 1.08  |
| 108273426 | oxld1        | 0.94  | 1.15  | 1.16  | 1.01  | 0.88  |
| 108273828 | LOC108273828 | -1.08 | -0.61 | -0.63 | -1.08 | -1.03 |
| 108274372 | dusp3        | 1.97  | 1.86  | 1.11  | 1.70  | 1.09  |
| 100528725 | f100a        | 1.43  | 1.12  | 0.68  | 0.91  | 1.04  |
| 108274083 | itga3        | -0.97 | -0.89 | -1.02 | -1.35 | -1.99 |
| 108274245 | rbp4         | 2.42  | 1.60  | 1.08  | 1.72  | 0.77  |
| 108273572 | LOC108273572 | 0.73  | 0.78  | 1.40  | 1.76  | 1.17  |
| 108273582 | LOC108273582 | -1.25 | -1.04 | -0.01 | -0.26 | -1.33 |
| 108274848 | LOC108274848 | -0.51 | -1.22 | -1.58 | -1.15 | 0.02  |
| 108274891 | LOC108274891 | 1.72  | 0.80  | 0.98  | 1.23  | 1.80  |
| 108274818 | LOC108274818 | 2.01  | 1.76  | 0.01  | 1.18  | 0.46  |
| 108274834 | LOC108274834 | -1.06 | -1.19 | -0.46 | -0.85 | -1.90 |
| 108275365 | LOC108275365 | 1.46  | 1.26  | 0.93  | 1.04  | 0.54  |
| 100528703 | fhl3         | -0.93 | -0.97 | -1.81 | -1.99 | -1.16 |
| 108274700 | slc25a22     | -1.17 | -0.90 | -0.86 | -1.06 | -1.01 |
| 108274967 | LOC108274967 | 1.30  | 1.09  | 0.60  | 1.48  | 0.44  |
| 108275317 | LOC108275317 | 1.64  | 0.76  | 0.59  | 1.04  | 1.26  |
| 108274441 | LOC108274441 | 2.21  | 1.42  | 1.67  | 0.50  | 0.33  |
| 108259249 | LOC108259249 | -1.01 | -1.29 | -1.06 | -0.85 | -0.66 |
| 108275285 | hbp1         | 1.10  | 1.13  | 0.95  | 1.13  | 0.84  |
| 108274999 | LOC108274999 | 1.22  | 1.05  | 0.77  | 0.86  | 1.02  |
| 108275377 | spock1       | 1.50  | 0.84  | 0.66  | 1.49  | 1.09  |
| 108274694 | LOC108274694 | 0.56  | 0.77  | 1.18  | 1.69  | 1.49  |
| 108275382 | LOC108275382 | -1.29 | -1.08 | -0.51 | -1.19 | -0.93 |
| 108274582 | LOC108274582 | -1.29 | -1.09 | -0.90 | -0.96 | -1.18 |
| 108274583 | LOC108274583 | 0.49  | 1.08  | 1.42  | 1.87  | 0.84  |
| 108274635 | LOC108274635 | 1.14  | 0.93  | 0.48  | 1.20  | 1.12  |
| 108274735 | LOC108274735 | -2.08 | -1.16 | -0.26 | -1.52 | -0.41 |
| 108260862 | LOC108260862 | 0.74  | 1.02  | 1.05  | 1.27  | 0.74  |
| 108275662 | pou6f1       | 0.99  | 1.29  | 1.27  | 0.76  | 1.04  |
| 108275668 | LOC108275668 | 1.56  | 1.18  | 0.80  | 1.27  | 0.53  |
| 108276417 | LOC108276417 | -1.00 | 0.46  | 1.09  | 1.07  | 0.89  |
| 108276709 | LOC108276709 | 0.41  | 0.18  | 1.19  | 2.40  | 1.36  |
| 108276254 | LOC108276254 | 2.25  | 1.00  | 0.08  | 1.06  | 0.33  |
| 108276151 | LOC108276151 | -0.98 | -1.45 | -0.47 | -1.08 | -4.87 |
| 100305026 | cd63         | 1.48  | 0.99  | 0.58  | 1.14  | 1.09  |
| 108259092 | LOC108259092 | 1.13  | 0.70  | 0.76  | 2.43  | 1.93  |
| 108256275 | hert         | -2.13 | -0.35 | 0.05  | 1.21  | 1.51  |
| 108276102 | LOC108276102 | 2.67  | 1.60  | 1.10  | 0.90  | 0.54  |
| 108258964 | pold1        | -0.54 | -0.89 | -1.30 | -1.26 | -1.24 |

|           |              |       |       |       |       |       |
|-----------|--------------|-------|-------|-------|-------|-------|
| 108275960 | LOC108275960 | 1.48  | 1.50  | 1.10  | 0.95  | 0.45  |
| 108276423 | LOC108276423 | 0.92  | 1.14  | 0.79  | 1.19  | 1.17  |
| 100528082 | lzie         | 1.64  | 1.33  | 0.83  | 1.23  | 0.98  |
| 108275789 | LOC108275789 | -1.09 | -0.38 | -0.11 | 1.04  | 1.56  |
| 108275788 | LOC108275788 | -1.74 | -0.76 | 0.47  | 1.97  | 2.59  |
| 108275795 | LOC108275795 | -0.33 | 0.29  | 1.00  | 2.37  | 2.28  |
| 108276445 | lsm14b       | -1.50 | -1.33 | -0.82 | -1.07 | -0.68 |
| 108276271 | LOC108276271 | -1.58 | -1.42 | -0.73 | -1.46 | -0.73 |
| 108275522 | LOC108275522 | 2.51  | 1.14  | 1.44  | 2.17  | 1.91  |
| 108276357 | LOC108276357 | 1.78  | 1.09  | 0.30  | 0.86  | 1.69  |
| 108276883 | actr1b       | 1.78  | 1.11  | 0.92  | 1.30  | 0.99  |
| 108276554 | LOC108276554 | -1.56 | -0.47 | -1.23 | -1.46 | -0.62 |
| 108277176 | rnf208       | -1.85 | -0.69 | -1.40 | -1.70 | -0.97 |
| 108277085 | xpo7         | 1.23  | 0.99  | 0.91  | 1.14  | 1.02  |
| 108277084 | LOC108277084 | -0.06 | 0.62  | 1.13  | 1.51  | 2.01  |
| 108276941 | LOC108276941 | 0.36  | 0.00  | 1.18  | 1.37  | 1.55  |
| 108276769 | lox12        | 2.04  | 1.10  | 0.95  | 0.79  | 1.92  |
| 108277037 | LOC108277037 | -1.22 | -0.92 | -0.97 | -1.44 | -1.15 |
| 108277154 | LOC108277154 | -0.77 | -0.41 | -1.00 | -1.12 | -1.40 |
| 108276951 | LOC108276951 | -1.75 | -0.90 | -0.70 | -1.39 | -1.10 |
| 108276694 | prr11        | 2.27  | 1.62  | 0.90  | 0.84  | 1.65  |
| 108276687 | spg20        | 1.19  | 1.62  | 2.53  | 2.79  | 2.67  |
| 108261198 | nupr1        | 1.49  | 0.78  | 1.14  | 0.57  | 1.34  |
| 108276838 | LOC108276838 | -1.62 | -0.88 | -1.12 | -1.23 | -0.94 |
| 108276903 | LOC108276903 | 1.15  | 1.09  | 0.78  | 1.11  | 0.73  |
| 108276618 | LOC108276618 | 1.61  | -0.04 | -0.05 | 1.08  | 1.23  |
| 108276861 | glb1l2       | -1.59 | -1.53 | -1.47 | -0.66 | -0.37 |
| 108276868 | LOC108276868 | -0.44 | -0.54 | -1.80 | -1.80 | -1.57 |
| 108276914 | LOC108276914 | 1.16  | 1.60  | 1.33  | -0.86 | 0.75  |
| 100526826 | mmp13        | 1.39  | 0.79  | 0.86  | 1.44  | 1.33  |
| 108277285 | LOC108277285 | 1.63  | 0.87  | 1.05  | 0.78  | 1.53  |
| 108277018 | LOC108277018 | -1.74 | -0.21 | -1.20 | -1.59 | -0.87 |
| 108277024 | LOC108277024 | 1.01  | 1.10  | 0.76  | 1.28  | 0.77  |
| 108277205 | LOC108277205 | -1.35 | -0.78 | -1.03 | -1.21 | -0.87 |
| 108277865 | LOC108277865 | 0.21  | 0.47  | 1.02  | 1.44  | 2.15  |
| 108278129 | LOC108278129 | -1.62 | -1.38 | -0.69 | -0.96 | -1.47 |
| 108277971 | maml2        | 1.44  | 1.21  | 0.84  | 1.02  | 0.59  |
| 100528824 | dhr13        | 1.25  | 0.94  | 0.63  | 1.19  | 1.18  |
| 108277473 | LOC108277473 | 0.85  | 2.09  | 1.38  | 1.96  | 2.82  |
| 108278265 | LOC108278265 | -1.15 | -1.62 | -1.08 | -0.65 | -0.76 |
| 108278240 | LOC108278240 | 1.12  | 1.07  | 0.88  | 0.55  | 1.19  |
| 108277502 | ppp1r14a     | 1.08  | 1.05  | 1.06  | 0.80  | 0.52  |
| 108278921 | LOC108278921 | -1.36 | -0.83 | -1.24 | -1.28 | -0.21 |
| 108278315 | c1qtnf5      | 1.26  | 0.75  | 1.18  | 1.04  | 0.92  |
| 108277802 | mcam         | 1.41  | 1.02  | 0.24  | 1.04  | 0.91  |

|           |              |       |       |       |       |       |
|-----------|--------------|-------|-------|-------|-------|-------|
| 108278355 | LOC108278355 | -0.51 | -0.47 | -1.36 | -1.45 | -1.77 |
| 108277989 | LOC108277989 | 2.15  | 2.30  | 1.03  | 1.76  | 1.20  |
| 108277854 | LOC108277854 | 1.02  | 1.05  | 0.96  | 1.29  | 0.93  |
| 108277947 | clcn2        | 1.46  | 1.18  | 0.99  | 1.51  | 0.52  |
| 108278860 | sar1b        | 1.53  | 1.09  | 0.57  | 1.11  | 0.86  |
| 108278901 | agpat2       | 1.83  | 0.57  | 1.11  | 0.71  | 1.07  |
| 108279157 | LOC108279157 | 1.78  | 1.58  | 0.89  | 1.16  | 0.95  |
| 108279284 | LOC108279284 | -1.15 | -0.76 | -0.86 | -1.44 | -1.32 |
| 108279028 | LOC108279028 | 1.28  | 1.05  | 1.41  | 0.40  | 0.38  |
| 108278804 | LOC108278804 | 1.28  | 1.17  | 1.30  | 0.81  | 0.79  |
| 108278447 | LOC108278447 | 0.64  | 0.74  | 1.23  | 3.58  | 2.69  |
| 108259690 | epor         | 1.33  | 1.06  | 1.49  | 0.80  | 0.49  |
| 108258030 | LOC108258030 | 0.45  | 1.21  | 1.23  | 1.17  | 0.87  |
| 108279306 | LOC108279306 | -1.34 | -0.83 | -1.02 | -1.09 | -0.77 |
| 108279238 | LOC108279238 | 1.24  | 1.18  | 0.64  | 1.14  | 0.85  |
| 108279272 | LOC108279272 | 0.67  | 1.26  | 1.41  | 1.33  | 1.11  |
| 108279061 | angptl5      | 1.06  | 0.66  | 0.05  | 1.27  | 2.10  |
| 108279371 | il7r         | 0.87  | 1.42  | 1.53  | 1.78  | 1.52  |
| 108279386 | klf4         | -2.71 | 0.36  | -2.26 | -2.14 | -0.07 |
| 108278284 | LOC108278284 | -2.66 | -0.55 | -2.07 | -2.09 | -0.23 |
| 108278512 | LOC108278512 | -0.32 | 1.13  | 0.60  | 1.56  | 1.58  |
| 108278844 | rbmx2        | -1.09 | -1.23 | -0.88 | -0.96 | -1.02 |
| 108278942 | LOC108278942 | -1.36 | -1.24 | -0.93 | -1.07 | -0.18 |
| 108279559 | LOC108279559 | -1.73 | -1.34 | -0.74 | -1.17 | -0.72 |
| 108279917 | crebl2       | 1.74  | 1.50  | 1.04  | 1.65  | 0.12  |
| 108280148 | LOC108280148 | -0.75 | -1.22 | -1.33 | -1.54 | -0.41 |
| 108277022 | LOC108277022 | 2.14  | 1.53  | 1.05  | 0.48  | 0.51  |
| 108274429 | LOC108274429 | -1.18 | -1.31 | -1.33 | -0.89 | -0.65 |
| 108280030 | LOC108280030 | 1.73  | 1.17  | 1.33  | 1.48  | 1.88  |
| 108259738 | sox8         | 1.45  | 0.79  | 0.68  | 1.41  | 1.70  |
| 108279833 | LOC108279833 | 1.35  | 1.02  | 0.57  | 1.23  | 0.91  |
| 108279487 | cpsf6        | 0.97  | 1.01  | 0.97  | 1.13  | 1.09  |
| 108276772 | LOC108276772 | -1.30 | -0.71 | -0.66 | -1.06 | -1.03 |
| 108280374 | prss35       | 1.78  | 0.92  | 0.16  | 1.82  | 2.86  |
| 108280897 | LOC108280897 | 1.76  | 1.33  | 0.99  | 1.77  | 1.04  |
| 100528361 | cahz         | 1.84  | 0.59  | 0.81  | 1.81  | 1.46  |
| 108280643 | LOC108280643 | -1.45 | -1.30 | -0.90 | -1.29 | -0.33 |
| 108280199 | LOC108280199 | -1.51 | -0.72 | 0.68  | 1.73  | 2.32  |
| 108280690 | LOC108280690 | -0.03 | 0.07  | 1.21  | 1.61  | 1.46  |
| 108280525 | LOC108280525 | 1.58  | 1.14  | 0.89  | 1.47  | 0.76  |
| 108280458 | LOC108280458 | -2.17 | -0.25 | 1.13  | 1.07  | 0.57  |
| 108280659 | LOC108280659 | -1.26 | -0.80 | -0.81 | -1.28 | -1.12 |
| 108280323 | LOC108280323 | -1.42 | -0.80 | -0.67 | -1.31 | -1.32 |
| 108280306 | LOC108280306 | 3.42  | 1.75  | 1.73  | 2.37  | 3.40  |
| 108255136 | LOC108255136 | 1.41  | 0.70  | 0.95  | 1.00  | 1.21  |

|           |              |       |       |       |       |       |
|-----------|--------------|-------|-------|-------|-------|-------|
| 108281092 | capzb        | 1.48  | 1.07  | 0.60  | 1.07  | 0.72  |
| 108254879 | LOC108254879 | -1.42 | -1.16 | -0.96 | -1.21 | -0.87 |
| 108255067 | sema3f       | -1.43 | -1.40 | -1.07 | -0.87 | -0.99 |
| 100528356 | brk1         | 1.65  | 1.29  | 0.68  | 0.88  | 1.01  |
| 108254871 | magi1        | -1.46 | -1.06 | -0.89 | -1.08 | -0.94 |
| 108280969 | LOC108280969 | 1.79  | 0.92  | 1.32  | 1.47  | 0.66  |
| 108255033 | srgap2       | 0.91  | 1.03  | 1.21  | 1.46  | 0.95  |
| 108277157 | dgkq         | 1.06  | 0.55  | 1.05  | 1.29  | 0.77  |
| 108255132 | sox13        | 0.82  | 1.16  | 1.25  | 1.11  | 0.53  |
| 108274138 | LOC108274138 | -0.33 | 0.77  | 1.22  | 1.01  | 1.24  |
| 108255108 | LOC108255108 | 2.64  | 1.14  | 2.19  | 2.64  | 3.28  |
| 108255085 | smarcd1      | 1.11  | 1.02  | 0.68  | 1.22  | 0.94  |
| 108254917 | LOC108254917 | 1.46  | 0.75  | 1.16  | 1.53  | 0.82  |
| 108255519 | LOC108255519 | -1.66 | -1.36 | -0.69 | -0.49 | -1.14 |
| 108255376 | LOC108255376 | -0.35 | -0.98 | -1.71 | -4.88 | -2.82 |
| 108255935 | tnc          | 0.67  | 0.88  | 1.60  | 2.83  | 3.19  |
| 108255497 | pik3ip1      | 1.37  | 1.09  | 1.01  | 0.89  | 0.74  |
| 108255668 | LOC108255668 | 1.73  | 2.01  | 1.53  | 1.63  | 1.31  |
| 108255916 | psat1        | 0.74  | 0.60  | 1.31  | 1.36  | 1.04  |
| 108255410 | LOC108255410 | 0.77  | 0.43  | 1.16  | 1.45  | 1.09  |
| 108255724 | LOC108255724 | 1.56  | 1.06  | 0.28  | 1.22  | 0.81  |
| 108256049 | c22h8orf4    | -1.46 | -0.17 | -1.23 | -1.08 | -0.67 |
| 100529004 | ucrp         | -0.70 | -1.03 | -0.71 | -1.50 | -2.50 |
| 108255572 | LOC108255572 | 1.02  | 0.54  | 0.65  | 1.25  | 1.05  |
| 108255573 | LOC108255573 | 1.12  | 0.92  | 1.02  | 1.20  | 0.70  |
| 108255562 | LOC108255562 | -2.02 | -1.26 | -0.95 | -1.39 | -0.74 |
| 108255636 | LOC108255636 | -0.33 | -0.67 | -1.05 | -1.25 | -1.16 |
| 108256596 | bcl2         | -1.18 | -1.24 | -1.04 | -0.73 | -0.69 |
| 100305041 | myd88        | 0.37  | 1.72  | 0.55  | 1.11  | 1.19  |
| 108256593 | smpx         | 1.16  | 0.56  | 0.04  | 1.62  | 2.60  |
| 108256317 | LOC108256317 | 0.09  | 0.80  | 1.70  | 1.36  | 2.07  |
| 108256319 | LOC108256319 | -0.98 | 0.01  | 1.34  | 2.06  | 2.94  |
| 108256648 | LOC108256648 | 1.36  | 1.28  | 0.88  | 1.50  | 0.46  |
| 108256634 | LOC108256634 | 1.05  | 0.93  | 1.22  | 0.60  | 1.05  |
| 108256675 | nr4a3        | -1.64 | -1.36 | -1.18 | -0.65 | 0.54  |
| 108256384 | atad2        | -0.79 | -0.89 | -1.17 | -1.01 | -1.12 |
| 108256450 | slc25a32     | 1.34  | 0.99  | 1.03  | 0.98  | 1.00  |
| 108256168 | otud7b       | 0.73  | 1.27  | 1.06  | 1.41  | 0.79  |
| 108257035 | LOC108257035 | 1.02  | 1.00  | 1.05  | 0.97  | 2.77  |
| 108257472 | edn1         | -1.15 | -1.40 | -1.20 | -0.74 | -0.73 |
| 108257453 | elavl3       | -1.40 | -0.79 | -1.29 | -0.98 | -1.62 |
| 108257455 | LOC108257455 | 0.98  | 1.30  | 0.60  | 1.44  | 1.06  |
| 100526698 | actb         | 1.63  | 1.40  | 0.99  | 1.00  | 0.99  |
| 108256768 | LOC108256768 | 1.34  | 2.06  | 1.87  | 0.60  | 0.56  |
| 108257407 | kctd5        | 1.72  | 1.58  | 0.89  | 0.72  | 1.13  |



|           |              |       |       |       |       |       |
|-----------|--------------|-------|-------|-------|-------|-------|
| 108256977 | LOC108256977 | -0.73 | -1.18 | -0.83 | -1.65 | -2.67 |
| 108256956 | fabp3        | 1.51  | 1.36  | 1.25  | 0.77  | 0.84  |
| 108257174 | crtap        | 1.69  | 1.03  | 0.80  | 1.17  | 0.76  |
| 100528568 | t106b        | 2.45  | 1.76  | 0.91  | 1.53  | 0.77  |
| 108256796 | LOC108256796 | 0.91  | 0.68  | 1.61  | 1.55  | 1.91  |
| 108256973 | znf704       | 0.95  | 1.05  | 0.69  | 1.24  | 1.22  |
| 108256930 | slc52a2      | 1.40  | 0.87  | 0.99  | 1.17  | 1.09  |
| 108257132 | LOC108257132 | 2.23  | 0.28  | 0.10  | 1.09  | 1.26  |
| 108256777 | LOC108256777 | 2.03  | 1.69  | 1.08  | 1.23  | 1.91  |
| 108257498 | recql4       | -0.71 | -1.10 | -1.20 | -1.24 | -0.95 |
| 108257324 | LOC108257324 | -0.62 | -0.87 | -1.29 | -1.22 | -1.18 |
| 108257676 | LOC108257676 | -0.54 | -1.01 | -0.69 | -1.73 | -1.16 |
| 108257582 | zbtb1        | 1.62  | 0.94  | 1.09  | 1.20  | 0.67  |
| 108257600 | LOC108257600 | -1.59 | -1.04 | -0.81 | -1.35 | -0.76 |
| 108257881 | LOC108257881 | -1.82 | -1.16 | -0.69 | -1.17 | -0.66 |
| 108258055 | LOC108258055 | 1.54  | 1.30  | 0.86  | 1.26  | 0.76  |
| 108257746 | LOC108257746 | 2.48  | 1.61  | 0.81  | 1.15  | 0.83  |
| 108257805 | LOC108257805 | -1.72 | -0.76 | -0.70 | -1.35 | -1.08 |
| 108257922 | dhcr24       | -0.79 | -0.98 | -1.77 | -1.39 | -1.19 |
| 108258006 | b4galt6      | 1.17  | 1.23  | 0.94  | 1.14  | 0.70  |
| 108258041 | LOC108258041 | 0.52  | 0.75  | 1.16  | 1.16  | 1.79  |
| 108258186 | LOC108258186 | 1.62  | 1.20  | 0.70  | 1.01  | 0.74  |
| 108257724 | LOC108257724 | 2.29  | 2.68  | 2.45  | 2.09  | 2.05  |
| 108257932 | thbs1        | 3.76  | 1.22  | 0.26  | 0.90  | 1.50  |
| 108257918 | LOC108257918 | 1.01  | 0.42  | 0.08  | 2.24  | 2.04  |
| 108258636 | LOC108258636 | -1.03 | -0.71 | -0.37 | -1.38 | -1.27 |
| 108258561 | LOC108258561 | -1.79 | -1.09 | 0.11  | -0.13 | -1.48 |
| 108258885 | LOC108258885 | -1.43 | -1.03 | -0.87 | -1.30 | -0.91 |
| 108258870 | LOC108258870 | -0.50 | 0.08  | 1.14  | 2.88  | 3.64  |
| 108258302 | LOC108258302 | 2.37  | 1.27  | 0.29  | 1.06  | 0.68  |
| 108258877 | prss23       | 3.24  | 2.04  | 0.77  | 1.13  | 0.91  |
| 108258957 | LOC108258957 | 1.28  | 0.93  | 1.28  | 1.48  | 0.93  |
| 108258390 | hsf2bp       | -1.20 | -0.24 | -1.41 | -1.25 | -1.44 |
| 108258319 | sik1         | -0.14 | 0.92  | -3.08 | -4.64 | -1.33 |
| 108258981 | vangl1       | 1.14  | 1.26  | 0.92  | 1.05  | 0.84  |
| 108258304 | LOC108258304 | 3.63  | 2.20  | 1.70  | 2.97  | 3.11  |
| 108258466 | LOC108258466 | 1.18  | 0.56  | 1.80  | 2.02  | 1.00  |
| 108258461 | exosc1       | 1.46  | 1.39  | 1.15  | 0.65  | 0.83  |
| 108258424 | LOC108258424 | -1.19 | -0.79 | -0.68 | -1.08 | -1.09 |
| 108258795 | LOC108258795 | 0.52  | 0.11  | 1.07  | 1.48  | 1.95  |
| 108258783 | LOC108258783 | -0.15 | -0.73 | 1.34  | 1.68  | 3.63  |
| 100528693 | tppp3        | 1.04  | 0.00  | -0.04 | 1.76  | 2.07  |
| 108259600 | LOC108259600 | 0.99  | 0.98  | 1.38  | 1.48  | 1.16  |
| 108259147 | LOC108259147 | -1.27 | -1.14 | -1.09 | -0.35 | -0.47 |
| 100528335 | rabp1        | 2.07  | 1.24  | 2.55  | 0.84  | 1.79  |

|           |              |       |        |       |       |       |
|-----------|--------------|-------|--------|-------|-------|-------|
| 108259414 | shoc2        | 1.18  | 1.11   | 0.64  | 1.08  | 0.77  |
| 108259449 | LOC108259449 | 2.46  | 1.73   | 0.90  | 0.72  | 1.10  |
| 108259438 | gde1         | 1.22  | 1.18   | 0.94  | 1.26  | 0.69  |
| 108259427 | LOC108259427 | 1.59  | 1.31   | 0.92  | 1.00  | 0.90  |
| 108259408 | LOC108259408 | 1.56  | 1.05   | 1.24  | 0.94  | 0.56  |
| 108259812 | cchr1        | -1.49 | -1.06  | -0.98 | -1.17 | -1.00 |
| 108260012 | gab3         | -1.74 | -1.21  | -0.92 | -1.12 | -0.94 |
| 108260391 | LOC108260391 | 1.01  | 0.47   | 0.44  | 1.86  | 1.77  |
| 108260022 | LOC108260022 | -1.78 | -1.08  | -0.69 | -0.71 | -1.25 |
| 108260450 | LOC108260450 | -2.09 | -0.40  | -1.75 | -1.61 | -0.42 |
| 100528130 | ift22        | 1.51  | 1.17   | 0.74  | 0.93  | 1.20  |
| 108260222 | camkk1       | 1.06  | 1.34   | 0.88  | 1.21  | 0.98  |
| 108260260 | pkn3         | -1.12 | -1.04  | -0.67 | -0.92 | -1.13 |
| 108260407 | eral1        | 2.06  | 1.26   | 0.27  | 1.71  | 1.05  |
| 108260444 | lrrc75a      | 1.74  | 1.20   | 1.02  | 1.43  | 0.19  |
| 108259694 | smyd1        | -1.64 | -0.29  | -1.04 | -1.00 | -1.01 |
| 108259703 | LOC108259703 | -0.92 | -1.66  | -1.08 | -1.28 | -0.33 |
| 108257508 | LOC108257508 | 0.87  | 1.17   | 0.88  | 1.39  | 1.49  |
| 108260258 | pappa        | -1.26 | -1.24  | -0.99 | -0.95 | -1.08 |
| 100305006 | LOC100305006 | 1.10  | 0.61   | 1.92  | 3.25  | 3.34  |
| 108260692 | LOC108260692 | 0.26  | 0.08   | 1.81  | 2.84  | 3.16  |
| 108260858 | LOC108260858 | -0.58 | -1.14  | -1.37 | -1.18 | -0.55 |
| 108260545 | LOC108260545 | -0.62 | -1.28  | -1.64 | -1.40 | -0.36 |
| 108260640 | LOC108260640 | 1.99  | 1.21   | 0.46  | 0.47  | 1.61  |
| 108260659 | LOC108260659 | -0.60 | -1.22  | -1.06 | -1.49 | -1.47 |
| 108261007 | LOC108261007 | -0.93 | -0.52  | -1.25 | -1.60 | -1.15 |
| 100528634 | fabp2        | 2.26  | 1.56   | 0.64  | 0.89  | 1.20  |
| 108261068 | LOC108261068 | 1.07  | 0.71   | 1.43  | 1.15  | 0.71  |
| 108261084 | LOC108261084 | -0.68 | -1.13  | -1.50 | -1.18 | -0.83 |
| 108261098 | LOC108261098 | -0.59 | -1.55  | -1.34 | -1.53 | -0.74 |
| 108255105 | rars2        | -1.15 | -0.71  | -0.75 | -1.00 | -1.04 |
| 108261279 | LOC108261279 | 1.84  | 1.62   | 0.97  | 1.38  | 0.48  |
| 108261293 | LOC108261293 | 0.59  | 0.60   | 1.10  | 1.15  | 1.08  |
| 108261387 | LOC108261387 | 1.11  | 0.92   | 1.25  | 2.05  | 0.68  |
| 108261406 | LOC108261406 | 0.84  | 1.02   | 1.36  | 1.41  | 0.90  |
| 108261436 | LOC108261436 | 0.26  | -1.07  | 0.89  | 1.54  | 3.20  |
| 108261545 | LOC108261545 | -0.44 | -0.23  | 1.14  | 1.70  | 1.81  |
| 108261592 | LOC108261592 | 0.75  | 0.67   | 1.69  | 1.50  | 1.12  |
| 108261647 | LOC108261647 | 0.71  | 0.28   | 1.03  | 1.37  | 1.01  |
| 108261691 | LOC108261691 | 0.81  | 0.57   | 1.48  | 3.01  | 2.03  |
| 108261742 | LOC108261742 | -1.41 | -1.54  | -0.17 | -1.10 | -0.99 |
| 108261798 | LOC108261798 | 0.74  | 0.75   | 1.68  | 2.02  | 1.84  |
| 108261942 | LOC108261942 | -1.24 | -0.05  | 0.01  | 1.24  | 2.68  |
| 108261962 | LOC108261962 | -1.66 | -16.16 | -1.93 | -1.18 | -1.28 |
| 108262009 | LOC108262009 | -1.42 | -2.36  | -1.92 | -1.06 | -1.78 |

|           |              |       |       |       |       |       |
|-----------|--------------|-------|-------|-------|-------|-------|
| 108262052 | LOC108262052 | 1.51  | 0.86  | 1.95  | 1.02  | 0.65  |
| 108262160 | LOC108262160 | -1.85 | -0.53 | -0.47 | -1.02 | -1.20 |
| 108262167 | LOC108262167 | 1.15  | 0.84  | 1.00  | 1.51  | 1.43  |
| 108262179 | LOC108262179 | -2.70 | -1.67 | -0.80 | -0.20 | -1.13 |
| 108263798 | LOC108263798 | -0.36 | -0.95 | -1.51 | -1.74 | -1.04 |
| 108262359 | LOC108262359 | -1.18 | -1.25 | -0.88 | -1.15 | -0.83 |
| 108262492 | LOC108262492 | 0.20  | 0.40  | 2.79  | 4.49  | 4.23  |
| 108262496 | LOC108262496 | 0.35  | 0.28  | 1.43  | 1.12  | 1.54  |
| 108262672 | LOC108262672 | -2.24 | -0.52 | -0.85 | -1.38 | -1.40 |
| 108263012 | LOC108263012 | -1.43 | -1.16 | -0.86 | -0.77 | -2.03 |
| 804880    | ND1          | -1.15 | -0.79 | -0.74 | -1.12 | -1.06 |
| 804877    | ATP6         | -1.34 | -0.83 | -0.82 | -1.23 | -1.11 |
| 108263485 | LOC108263485 | 0.49  | 0.75  | 2.57  | 3.11  | 2.98  |
| 108263069 | LOC108263069 | -1.14 | -1.15 | -0.49 | -0.92 | -1.89 |
| 108262968 | LOC108262968 | 1.20  | 0.99  | 1.21  | 1.26  | 0.44  |
| 108263508 | LOC108263508 | 1.45  | 0.84  | -0.07 | -1.31 | -3.68 |
| 108263512 | atl1         | 1.89  | 1.17  | 0.11  | 0.90  | 1.32  |
| 108265322 | LOC108265322 | 1.01  | 0.92  | 1.15  | 1.22  | 0.94  |
| 108263347 | LOC108263347 | 1.99  | 1.24  | 1.51  | 1.72  | 1.08  |
| 108263206 | borcs7       | 2.07  | 1.40  | 1.12  | 1.74  | 0.75  |
| 108263469 | LOC108263469 | -0.57 | -0.91 | 2.63  | -1.99 | -1.69 |
| 108263603 | letm1        | 1.37  | 1.23  | 0.91  | 1.36  | 0.63  |
| 108263292 | ppm1b        | 1.36  | 1.10  | 0.49  | 1.39  | 0.97  |
| 108262909 | zfp36l2      | 1.42  | 0.78  | 1.29  | 1.56  | 0.88  |
| 108270134 | snx27        | 1.56  | 0.93  | 1.20  | 1.17  | 0.63  |
| 108263626 | LOC108263626 | 0.94  | 1.13  | 0.99  | 1.17  | 1.06  |
| 108263260 | LOC108263260 | -1.09 | -0.97 | -0.73 | -1.06 | -1.87 |
| 108263096 | LOC108263096 | 0.85  | 1.18  | 1.85  | 0.91  | 1.37  |
| 108263763 | plek2        | -2.18 | -0.20 | -2.29 | -1.95 | -0.33 |
| 100528537 | gmfb         | 1.82  | 1.14  | 0.64  | 0.91  | 1.05  |
| 108264050 | kcp          | 1.66  | 1.67  | 0.46  | 1.23  | 2.01  |
| 108264828 | irf8         | -1.28 | -1.03 | -0.40 | -0.36 | -1.19 |
| 108264621 | fosb         | -1.47 | 1.19  | -1.20 | -0.82 | 0.21  |
| 108263951 | LOC108263951 | 2.41  | 1.21  | 0.46  | 0.96  | 1.17  |
| 108264663 | ric8b        | 1.09  | 0.70  | 0.41  | 1.31  | 1.44  |
| 108263939 | LOC108263939 | 0.61  | 1.43  | 1.00  | 0.84  | 1.49  |
| 100528312 | got2         | 2.06  | 1.38  | 0.45  | 1.06  | 0.72  |
| 108264333 | c4h19orf54   | -1.21 | -0.63 | -0.52 | -1.00 | -1.29 |
| 108264335 | LOC108264335 | -1.11 | -1.13 | -1.05 | -0.98 | -0.67 |
| 108263907 | LOC108263907 | -2.15 | -1.32 | -1.05 | 0.04  | -0.26 |
| 108264150 | LOC108264150 | 3.00  | 2.04  | 1.60  | 1.73  | 2.04  |
| 108264904 | hnf1a        | -1.46 | -0.34 | -0.46 | -1.30 | -1.15 |
| 108265831 | LOC108265831 | 1.06  | 0.71  | -0.39 | -1.14 | -1.65 |
| 108265444 | LOC108265444 | 0.60  | 0.68  | 1.34  | 1.45  | 1.38  |
| 108265303 | LOC108265303 | -1.25 | -0.58 | -1.05 | -1.23 | -0.90 |

|           |              |       |       |       |       |       |
|-----------|--------------|-------|-------|-------|-------|-------|
| 108265299 | LOC108265299 | 1.55  | 1.44  | 2.25  | 2.35  | 2.40  |
| 108265915 | LOC108265915 | -3.00 | -3.20 | -3.33 | -0.98 | 0.33  |
| 108265506 | nkx6-3       | -1.19 | -0.64 | -0.72 | -1.59 | -1.08 |
| 108265985 | klhl22       | 1.38  | 1.24  | 0.99  | 1.46  | 0.90  |
| 100528489 | 143b1        | 1.99  | 1.31  | 0.56  | 1.17  | 0.78  |
| 108263781 | LOC108263781 | -1.27 | -0.78 | -0.87 | -1.41 | -1.19 |
| 108265046 | LOC108265046 | -0.62 | -1.19 | -1.25 | -1.62 | -0.46 |
| 108265054 | acot7        | 1.37  | 1.00  | 0.28  | 1.01  | 1.02  |
| 108266913 | leng9        | -1.38 | -0.67 | -1.23 | -1.12 | -0.69 |
| 108265536 | LOC108265536 | -2.14 | -0.80 | -0.71 | -1.28 | -1.52 |
| 108265714 | LOC108265714 | 0.81  | 1.20  | 1.44  | 1.16  | 0.87  |
| 108266957 | LOC108266957 | -1.15 | -0.58 | -0.45 | -1.16 | -1.73 |
| 108265488 | gp1bb        | 1.67  | 1.87  | 1.48  | 1.28  | 1.25  |
| 108266002 | LOC108266002 | 1.21  | 1.11  | 0.80  | 1.08  | 0.89  |
| 108265761 | clps         | -1.73 | -1.56 | -1.20 | -1.08 | -1.45 |
| 108265004 | cdkn2c       | 1.34  | 1.12  | 0.29  | 1.07  | 0.56  |
| 100304980 | mmp9         | 2.50  | 1.66  | 2.04  | 0.54  | -1.23 |
| 108266056 | pym1         | 2.11  | 1.41  | 0.81  | 1.63  | 0.89  |
| 108265019 | LOC108265019 | 0.86  | 1.87  | 2.83  | 2.73  | 2.66  |
| 100528527 | hoxa13       | 1.31  | 1.02  | 0.46  | 0.97  | 1.19  |
| 108266852 | LOC108266852 | 1.62  | 1.06  | 1.37  | 1.21  | 1.61  |
| 108266222 | LOC108266222 | -0.19 | -1.73 | -1.50 | -1.30 | -0.27 |
| 108266644 | rapgef4      | -1.24 | -1.01 | -0.63 | -0.27 | 1.01  |
| 108266138 | kctd12       | 1.53  | 0.66  | 0.75  | 1.73  | 2.03  |
| 108266612 | lrrc58       | 2.24  | 1.96  | 1.71  | 1.95  | 1.60  |
| 108266814 | st6gal2      | 1.27  | 1.34  | 1.21  | 0.77  | 0.63  |
| 108272593 | wispl        | 3.14  | 1.71  | 1.25  | 1.36  | 2.71  |
| 108266081 | chaf1b       | -0.77 | -0.98 | -1.00 | -1.29 | -1.31 |
| 108266072 | itgb11       | 1.89  | 0.40  | 0.44  | 1.00  | 1.23  |
| 108266761 | klf5         | 1.25  | 1.01  | 0.83  | 1.18  | 0.74  |
| 108266888 | dct          | 0.02  | -0.30 | -1.63 | -1.37 | -1.11 |
| 108257949 | hormad1      | -0.91 | -0.66 | -1.43 | -1.18 | -1.05 |
| 108267408 | LOC108267408 | 2.51  | 1.64  | 0.93  | 1.06  | 0.28  |
| 108267231 | LOC108267231 | -0.05 | 0.35  | 1.11  | 1.66  | 1.39  |
| 108267632 | LOC108267632 | 1.85  | 0.75  | 0.73  | 1.20  | 1.00  |
| 108268341 | LOC108268341 | -1.59 | -1.50 | -0.71 | -0.70 | -2.12 |
| 108267709 | LOC108267709 | -1.14 | -1.08 | -0.43 | -0.42 | -1.14 |
| 108267845 | slc25a36     | 1.41  | 1.49  | 1.44  | 0.96  | 0.79  |
| 108267066 | shh          | -1.49 | -0.93 | -1.18 | -1.26 | -0.99 |
| 108268051 | rbm33        | 1.07  | 0.90  | 1.05  | 1.22  | 0.76  |
| 108267601 | LOC108267601 | 2.60  | 1.00  | 0.53  | 0.57  | 1.16  |
| 108268185 | LOC108268185 | 0.94  | 0.79  | 1.04  | 1.48  | 1.49  |
| 108268096 | plin2        | -1.87 | 0.07  | -1.20 | -1.60 | -0.53 |
| 108267158 | LOC108267158 | 1.93  | 1.67  | 1.03  | 0.96  | 1.31  |
| 108267499 | LOC108267499 | 1.23  | 1.13  | 0.84  | 1.10  | 0.58  |

|           |              |       |       |       |       |       |
|-----------|--------------|-------|-------|-------|-------|-------|
| 108267166 | LOC108267166 | -0.96 | -1.45 | 3.85  | -1.24 | -0.64 |
| 108267507 | ccs          | 2.39  | 2.08  | 1.23  | 1.86  | 1.47  |
| 108258200 | LOC108258200 | -1.53 | -1.91 | -0.94 | -0.46 | -1.16 |
| 108268314 | LOC108268314 | 3.11  | 1.24  | 0.56  | 1.74  | 0.73  |
| 108267848 | LOC108267848 | -1.04 | -0.75 | -1.23 | -1.11 | -0.46 |
| 108268076 | LOC108268076 | -1.21 | -0.74 | -0.89 | -1.62 | -1.71 |
| 108267107 | LOC108267107 | -1.53 | -1.05 | -0.82 | -0.94 | -1.34 |
| 108267524 | wnt9a        | 1.04  | 1.13  | 0.99  | 1.07  | 0.22  |
| 108268589 | adat1        | -1.00 | -1.00 | -0.69 | -1.31 | -0.97 |
| 108268429 | LOC108268429 | -0.41 | -1.02 | -1.06 | -0.78 | -1.10 |
| 108268391 | LOC108268391 | 1.19  | 0.98  | 1.49  | 1.35  | 0.56  |
| 108268849 | LOC108268849 | -1.11 | -0.40 | -0.30 | -1.05 | -1.20 |
| 108280026 | LOC108280026 | -0.66 | -1.00 | -1.15 | -1.10 | -0.82 |
| 108268911 | LOC108268911 | 0.99  | 0.59  | 1.24  | 1.34  | 1.38  |
| 108269300 | tgfb1        | 1.99  | 0.61  | 0.84  | 1.14  | 2.00  |
| 108269608 | LOC108269608 | 1.07  | 1.13  | 0.26  | 1.01  | 0.95  |
| 108268698 | znf277       | 1.09  | 1.13  | 0.99  | 1.04  | 0.52  |
| 108269115 | LOC108269115 | 0.05  | 0.74  | 1.88  | 2.70  | 3.28  |
| 108268439 | LOC108268439 | -0.10 | 0.09  | 1.36  | 2.59  | 3.73  |
| 108268752 | LOC108268752 | -1.67 | -1.64 | -0.89 | -1.21 | -0.55 |
| 108269088 | LOC108269088 | 1.42  | 1.33  | 1.03  | 0.70  | 0.58  |
| 108269800 | luzp1        | 1.18  | 0.91  | 1.13  | 1.28  | 0.81  |
| 108270090 | LOC108270090 | -2.29 | -1.03 | -0.65 | -1.87 | -0.82 |
| 108269777 | LOC108269777 | -1.21 | -1.02 | -0.69 | -1.30 | -1.00 |
| 108270293 | LOC108270293 | -1.60 | -1.12 | -0.79 | -1.03 | -0.75 |
| 108270041 | LOC108270041 | -1.60 | -1.75 | -1.41 | -0.24 | -0.07 |
| 100528996 | act2         | -1.45 | -0.74 | -0.63 | -1.44 | -1.11 |
| 108270299 | pax1         | 1.68  | 1.28  | 0.25  | 0.93  | 1.46  |
| 100304648 | LOC100304648 | -1.91 | -1.36 | -0.89 | -1.20 | -0.28 |
| 108269923 | LOC108269923 | 0.12  | 0.03  | 1.13  | 2.48  | 3.57  |
| 108270338 | ephx2        | -1.55 | -1.29 | -1.17 | -0.41 | -0.20 |
| 108270465 | LOC108270465 | -0.16 | -0.23 | 1.50  | 2.56  | 2.85  |
| 108269440 | LOC108269440 | -1.94 | -1.65 | -1.27 | -0.75 | -0.71 |
| 108269854 | LOC108269854 | 0.46  | 1.13  | 0.67  | 1.08  | 1.21  |
| 108270086 | LOC108270086 | 1.27  | 0.56  | 0.92  | 1.58  | 1.34  |
| 108270429 | LOC108270429 | 0.84  | 1.71  | 1.38  | -0.50 | 1.09  |
| 108270418 | LOC108270418 | -1.56 | -1.33 | -1.21 | -0.35 | -0.85 |
| 108269453 | hmgcl        | 1.33  | 1.11  | 1.10  | 1.42  | 0.95  |
| 108269593 | kbtbd11      | 2.46  | 1.66  | 1.75  | 2.10  | 0.81  |
| 108269739 | LOC108269739 | 2.30  | 1.60  | 1.54  | 1.60  | 1.40  |
| 108271338 | scube2       | -4.94 | -6.31 | -1.39 | -6.00 | -0.09 |
| 108271371 | LOC108271371 | 0.63  | 1.35  | 1.36  | 1.14  | 1.38  |
| 108270887 | lyve1        | -0.94 | -1.88 | -2.65 | -2.14 | -1.07 |
| 108270996 | LOC108270996 | -1.80 | -1.03 | -0.85 | -1.27 | -1.47 |
| 108270969 | LOC108270969 | -1.79 | -0.91 | -1.20 | -1.99 | -2.60 |

|           |              |       |       |       |       |       |
|-----------|--------------|-------|-------|-------|-------|-------|
| 100305061 | LOC100305061 | -1.36 | -1.63 | -1.42 | -1.21 | -0.64 |
| 108271424 | rasl12       | 1.74  | 1.48  | 0.80  | 1.43  | 1.56  |
| 108270925 | LOC108270925 | -1.19 | -1.07 | -0.45 | -1.12 | -1.92 |
| 108271131 | LOC108271131 | 1.82  | 1.16  | -0.01 | 1.19  | 1.08  |
| 108270713 | prkacb       | 0.82  | 1.28  | 1.25  | 1.64  | 1.31  |
| 108271430 | mpv17l2      | 2.40  | 2.07  | 1.76  | 2.17  | 1.48  |
| 108270518 | LOC108270518 | 1.76  | 1.01  | 1.05  | 1.14  | 0.94  |
| 108272009 | fam69c       | 1.85  | 1.42  | 0.82  | 1.27  | 1.09  |
| 108271021 | LOC108271021 | 2.09  | 1.28  | 0.98  | 1.86  | 2.20  |
| 108271912 | LOC108271912 | 1.55  | 1.41  | 1.69  | 1.42  | 0.09  |
| 108272495 | LOC108272495 | 1.59  | 1.11  | 0.71  | 1.27  | 1.25  |
| 108271985 | LOC108271985 | -1.38 | -1.49 | -0.94 | -1.25 | -1.24 |
| 108272106 | sclly        | -1.09 | -0.95 | -1.11 | -1.29 | -1.02 |
| 108271561 | LOC108271561 | -0.93 | -3.04 | -2.44 | -2.21 | -2.28 |
| 108271947 | LOC108271947 | -1.32 | -1.06 | -0.85 | -1.33 | -1.02 |
| 108272191 | ppm1j        | 0.78  | 1.31  | 1.11  | 1.16  | 1.21  |
| 108271927 | mybph        | -0.58 | -1.23 | -1.37 | -2.21 | -2.32 |
| 108272257 | LOC108272257 | 1.74  | 1.13  | 0.97  | 1.47  | 1.22  |
| 108271826 | LOC108271826 | -2.26 | -1.10 | -1.19 | -1.55 | -0.59 |
| 108273280 | LOC108273280 | -0.94 | -1.51 | -1.28 | -1.38 | -1.27 |
| 108273145 | LOC108273145 | -1.83 | -1.55 | -0.83 | -1.09 | -3.08 |
| 108270697 | LOC108270697 | 1.34  | 0.96  | 1.31  | 1.57  | 1.34  |
| 108273153 | LOC108273153 | 2.25  | 1.73  | 2.10  | 2.10  | 1.41  |
| 108272799 | LOC108272799 | 1.98  | 1.79  | 1.44  | 0.44  | 1.35  |
| 108273259 | ing4         | 1.83  | 1.25  | 1.28  | 1.56  | 0.71  |
| 108272665 | LOC108272665 | 1.25  | 1.27  | 1.47  | 1.44  | 1.00  |
| 108272781 | rarb         | -1.25 | -1.23 | -1.65 | -1.50 | -0.77 |
| 108280528 | LOC108280528 | -1.31 | -0.71 | -1.06 | -1.26 | -1.13 |
| 108272329 | LOC108272329 | -0.92 | -1.23 | -1.08 | -1.37 | -1.09 |
| 108272624 | LOC108272624 | 1.63  | 1.33  | 1.13  | 1.58  | 0.96  |
| 108272491 | LOC108272491 | 0.88  | 1.17  | 1.23  | 1.12  | 1.00  |
| 108274290 | LOC108274290 | -1.64 | -1.03 | -1.65 | -1.43 | -0.51 |
| 108274367 | LOC108274367 | -1.10 | -1.27 | -0.39 | -1.28 | -2.13 |
| 108274148 | ccdc6        | 1.58  | 1.33  | 1.34  | 1.17  | 0.16  |
| 108274346 | eme1         | -0.89 | -1.04 | -1.34 | -1.18 | -1.21 |
| 108273954 | LOC108273954 | 2.81  | 1.47  | 0.74  | 1.17  | 1.53  |
| 100304887 | cript        | 2.06  | 1.32  | 0.96  | 1.36  | 1.04  |
| 108274112 | ddit4        | -1.49 | -1.41 | -1.89 | -1.68 | -0.02 |
| 108274281 | LOC108274281 | 3.34  | 1.02  | 0.74  | 1.23  | 2.20  |
| 108273464 | meox1        | 2.38  | 1.04  | 0.88  | 1.23  | 1.05  |
| 108280927 | LOC108280927 | 2.00  | 0.99  | 1.10  | 1.61  | 1.08  |
| 108273855 | ppfia3       | -0.87 | -1.28 | -1.77 | -1.68 | -1.37 |
| 108274025 | LOC108274025 | 1.65  | 1.51  | 0.97  | 1.50  | 1.14  |
| 108275965 | tbc1d10b     | -1.03 | -1.08 | -0.71 | -1.03 | -1.03 |
| 108273807 | LOC108273807 | -1.27 | -1.63 | -1.90 | -1.94 | -0.52 |

|           |              |       |       |       |       |       |
|-----------|--------------|-------|-------|-------|-------|-------|
| 108275052 | LOC108275052 | -1.98 | -1.84 | -1.33 | -1.13 | -0.62 |
| 108274605 | LOC108274605 | 1.39  | 1.45  | 1.19  | 1.16  | 0.77  |
| 108274654 | LOC108274654 | 0.97  | 1.04  | 1.10  | 1.20  | 1.01  |
| 108274454 | tph1         | -1.47 | 1.36  | -0.43 | -1.20 | 2.50  |
| 108257278 | limd2        | 1.73  | 1.38  | 0.89  | 1.89  | 1.47  |
| 108274420 | hyal4        | 2.81  | 1.13  | 0.90  | 1.62  | 1.66  |
| 108274434 | LOC108274434 | 0.89  | 1.19  | 1.46  | 1.30  | 1.05  |
| 108275120 | tbc1d2b      | 1.23  | 1.11  | 0.98  | 1.25  | 1.24  |
| 108275217 | cat          | 1.66  | 0.95  | 1.04  | 1.08  | 1.04  |
| 108275230 | fam3c        | 1.85  | 1.48  | 0.80  | 1.20  | 1.10  |
| 108275979 | stk35        | 1.44  | 0.98  | 1.51  | 1.53  | 1.27  |
| 108275486 | LOC108275486 | 1.87  | 0.66  | 1.31  | 1.60  | 1.69  |
| 108276136 | pcmt2        | 1.27  | 1.43  | 0.87  | 1.33  | 1.47  |
| 108275618 | dnmt3b       | -1.27 | -1.60 | -0.91 | -1.54 | -1.23 |
| 108275765 | LOC108275765 | -1.89 | -1.49 | -0.77 | -1.78 | -2.18 |
| 108276460 | LOC108276460 | -1.10 | -1.20 | -1.04 | -1.02 | -0.73 |
| 108276894 | LOC108276894 | -2.21 | -3.15 | -0.94 | -2.48 | -2.41 |
| 108276832 | LOC108276832 | 1.38  | 0.96  | 1.13  | 1.38  | 1.08  |
| 108277389 | LOC108277389 | 0.80  | 1.16  | 1.13  | 1.43  | 1.51  |
| 108277111 | LOC108277111 | -2.33 | -1.40 | -0.43 | -1.13 | -1.28 |
| 108277328 | LOC108277328 | -2.18 | -1.21 | -1.23 | -1.24 | -0.62 |
| 108276608 | crybb1       | -1.58 | -1.79 | -1.83 | -1.47 | -0.91 |
| 108277532 | LOC108277532 | -1.67 | -1.36 | -1.77 | -1.50 | -0.62 |
| 108278074 | rab2a        | 1.62  | 1.15  | 0.69  | 1.09  | 1.04  |
| 108278039 | slc35g2      | -2.47 | -2.35 | -2.77 | -1.68 | -0.27 |
| 108276887 | LOC108276887 | 0.96  | 1.72  | 1.54  | 1.34  | 1.05  |
| 108277536 | LOC108277536 | -1.14 | -1.16 | -1.18 | -0.75 | -1.54 |
| 108279263 | LOC108279263 | 1.75  | 1.13  | 0.82  | 1.11  | 2.04  |
| 108277996 | LOC108277996 | -4.31 | -4.20 | -3.40 | -2.86 | -0.44 |
| 108274533 | drc3         | -1.67 | -1.66 | -0.73 | -1.50 | -2.46 |
| 108277591 | LOC108277591 | -1.23 | -1.22 | -0.80 | -1.15 | -1.24 |
| 108277595 | LOC108277595 | -4.30 | -3.41 | -2.85 | -2.28 | -0.33 |
| 108277891 | LOC108277891 | 0.65  | 1.63  | 1.89  | 1.02  | 1.25  |
| 108278302 | LOC108278302 | -1.80 | -1.20 | -1.15 | -1.04 | -0.86 |
| 108278346 | LOC108278346 | -4.37 | -3.58 | -3.33 | -2.67 | -0.53 |
| 108278100 | LOC108278100 | 1.37  | 1.24  | 0.95  | 1.57  | 1.22  |
| 108278199 | LOC108278199 | 1.36  | 1.55  | 1.27  | 1.81  | 0.90  |
| 108279081 | dck          | 1.97  | 1.31  | 0.73  | 1.10  | 1.29  |
| 108279271 | LOC108279271 | -1.38 | -0.89 | -2.05 | -2.44 | -1.02 |
| 108278490 | LOC108278490 | -1.04 | -0.64 | -1.12 | -1.68 | -1.65 |
| 108279166 | nat10        | 1.41  | 1.16  | 1.16  | 1.12  | 0.59  |
| 108279172 | LOC108279172 | -1.39 | -1.45 | -1.61 | -1.13 | -0.72 |
| 108278694 | LOC108278694 | 2.23  | 1.00  | 3.89  | 4.29  | 2.36  |
| 108279229 | bscl2        | 2.29  | 2.04  | 1.87  | 1.94  | 1.61  |
| 108278735 | cysltr2      | 1.11  | 0.86  | 1.17  | 1.48  | 1.06  |

|           |              |       |       |       |       |       |
|-----------|--------------|-------|-------|-------|-------|-------|
| 108278795 | crkl         | 1.49  | 1.18  | 1.17  | 1.37  | 0.78  |
| 108278712 | LOC108278712 | 0.85  | 1.17  | 1.44  | 2.04  | 1.67  |
| 108279352 | cldn2        | -1.90 | -1.53 | -1.16 | -1.27 | -0.52 |
| 108279095 | LOC108279095 | -1.66 | -0.87 | -1.18 | -1.44 | -1.29 |
| 108279165 | LOC108279165 | 2.05  | 1.70  | 0.96  | 1.16  | 1.25  |
| 108279519 | gpr19        | -2.31 | -1.79 | -2.48 | -2.27 | -0.94 |
| 108279724 | metap2       | -1.14 | -1.42 | -1.01 | -1.15 | -0.92 |
| 108280089 | rab21        | 1.34  | 1.02  | 1.00  | 1.50  | 1.27  |
| 108280090 | LOC108280090 | 1.73  | 1.24  | 1.00  | 1.57  | 1.17  |
| 108280002 | vegfa        | -1.05 | -1.16 | -1.22 | -1.09 | -0.67 |
| 108279982 | gramd4       | 2.53  | 2.04  | 2.63  | 3.05  | 2.91  |
| 108279913 | ckap4        | 2.13  | 1.10  | 1.65  | 0.60  | 1.21  |
| 108264732 | grb10        | 1.19  | 1.03  | 0.96  | 1.30  | 1.18  |
| 108279777 | LOC108279777 | -1.57 | -1.59 | -0.40 | -1.00 | -1.71 |
| 108279748 | LOC108279748 | 3.59  | 1.67  | 0.63  | 1.32  | 1.93  |
| 108279516 | ascl1        | -1.39 | -1.04 | -1.29 | -1.37 | -0.71 |
| 108279629 | LOC108279629 | -1.21 | -0.91 | -1.19 | -1.40 | -1.35 |
| 108280626 | zufsp        | -1.70 | -1.18 | -0.67 | -1.02 | -1.35 |
| 108280183 | LOC108280183 | 0.96  | 1.17  | 1.13  | 1.22  | 1.51  |
| 108280442 | tmem68       | 1.52  | 1.31  | 0.94  | 1.61  | 1.32  |
| 108264783 | LOC108264783 | 0.75  | 1.45  | 1.39  | 1.55  | 1.25  |
| 108280544 | LOC108280544 | -1.89 | -1.60 | -1.47 | -1.55 | -0.99 |
| 100529037 | nt5c3a       | 1.56  | 1.12  | 1.03  | 1.13  | 0.65  |
| 108280168 | coq3         | 2.03  | 1.03  | 1.32  | 0.97  | 1.27  |
| 100528391 | cdkl1        | -1.32 | -0.88 | -1.13 | -1.03 | -1.27 |
| 108280809 | LOC108280809 | 1.94  | 1.10  | 1.01  | 1.11  | 0.87  |
| 108280341 | LOC108280341 | 1.66  | 1.51  | 0.99  | 1.50  | 1.31  |
| 108280891 | LOC108280891 | -0.43 | -2.21 | -1.43 | -2.09 | -1.97 |
| 108280783 | slc25a42     | 1.86  | 1.53  | 1.54  | 1.25  | 0.84  |
| 108280646 | rab8a        | 1.55  | 1.11  | 0.84  | 1.33  | 1.23  |
| 100528604 | pter         | 1.90  | 1.73  | 0.65  | 1.12  | 1.17  |
| 108280744 | LOC108280744 | 2.27  | 1.59  | 0.56  | 1.07  | 1.95  |
| 108280481 | LOC108280481 | 1.56  | 1.65  | 1.34  | 1.03  | 0.80  |
| 108280531 | LOC108280531 | -1.73 | -1.83 | -1.97 | -1.60 | -1.34 |
| 108254707 | LOC108254707 | -1.28 | -1.17 | -1.00 | -1.31 | -1.26 |
| 108259941 | rbfox1       | -1.40 | -1.35 | -1.27 | -1.54 | -0.72 |
| 108254900 | LOC108254900 | 0.77  | 1.22  | 1.46  | 2.91  | 2.94  |
| 108254852 | LOC108254852 | -1.71 | -1.22 | -0.90 | -1.73 | -1.20 |
| 108255246 | prelp        | 2.43  | 1.14  | 0.87  | 1.02  | 1.72  |
| 108277468 | cltb         | 1.96  | 1.33  | 0.64  | 1.59  | 1.16  |
| 108254815 | vamp3        | 1.65  | 1.16  | 0.76  | 1.11  | 1.04  |
| 108255233 | LOC108255233 | 1.69  | 1.46  | 0.46  | 1.05  | 1.41  |
| 100529034 | map1lc3a     | 1.95  | 1.26  | 0.77  | 1.22  | 1.09  |
| 108255520 | cnnm4        | 1.31  | 1.24  | 1.26  | 1.25  | 0.90  |
| 108255502 | LOC108255502 | -1.02 | -0.85 | -1.01 | -1.29 | -1.64 |



|           |              |       |       |       |       |       |
|-----------|--------------|-------|-------|-------|-------|-------|
| 108255506 | LOC108255506 | 1.57  | 1.06  | 0.64  | 1.10  | 1.06  |
| 108255730 | mtmr12       | 1.16  | 1.37  | 0.89  | 1.21  | 1.21  |
| 108255749 | paqr3        | 1.54  | 1.13  | 1.13  | 1.33  | 0.82  |
| 108256064 | ggt6         | 1.80  | 1.53  | 1.08  | 1.08  | 0.98  |
| 108255347 | LOC108255347 | 2.17  | 1.17  | 1.04  | 1.39  | 0.91  |
| 108255765 | LOC108255765 | 0.94  | 1.15  | 1.24  | 1.68  | 1.81  |
| 108255810 | LOC108255810 | 2.02  | 1.13  | -0.12 | -1.40 | -2.00 |
| 108255614 | LOC108255614 | 0.86  | 1.15  | 1.38  | 1.04  | 1.00  |
| 108255571 | LOC108255571 | 1.37  | 1.25  | 1.14  | 1.93  | 0.99  |
| 108255564 | LOC108255564 | 1.31  | 0.95  | 1.27  | 1.56  | 1.29  |
| 108255606 | LOC108255606 | -1.23 | -1.27 | -0.18 | -1.90 | -2.58 |
| 108255605 | LOC108255605 | -1.35 | -1.25 | -0.71 | -1.81 | -3.09 |
| 108255586 | fam109a      | 1.96  | 1.45  | 1.12  | 0.91  | 1.00  |
| 108256687 | eya1         | -1.81 | -1.43 | -1.71 | -1.34 | -0.94 |
| 108256575 | trpa1        | -1.74 | -1.82 | -1.67 | -1.28 | -0.84 |
| 108256406 | LOC108256406 | 1.52  | 1.07  | 0.71  | 1.40  | 1.34  |
| 108256133 | LOC108256133 | -1.80 | -1.57 | -0.29 | -1.46 | -3.07 |
| 108256360 | LOC108256360 | -2.55 | -1.81 | -1.32 | -1.63 | -1.32 |
| 108256112 | LOC108256112 | -1.63 | -1.17 | -0.71 | -1.05 | -1.63 |
| 108256595 | fzd6         | 1.29  | 1.10  | 1.11  | 1.14  | 0.76  |
| 108256708 | LOC108256708 | -0.65 | -1.07 | -1.54 | -1.05 | -1.29 |
| 108256376 | lipe         | 2.10  | 1.71  | 2.06  | 2.06  | 2.27  |
| 108256310 | atp4a        | -1.21 | -1.12 | -1.08 | -0.88 | -1.25 |
| 108256254 | LOC108256254 | -1.38 | -0.42 | -1.08 | -2.97 | -2.01 |
| 108257192 | LOC108257192 | 1.66  | 1.58  | 1.59  | 1.22  | 1.30  |
| 108256927 | LOC108256927 | 0.49  | 1.04  | 1.04  | 2.52  | 2.65  |
| 108256895 | tbcd         | -1.16 | -0.75 | -1.01 | -1.03 | -1.03 |
| 108257050 | LOC108257050 | 1.82  | 1.39  | 1.62  | 1.62  | 0.70  |
| 108257052 | LOC108257052 | 0.45  | 1.13  | 1.77  | 1.40  | 1.60  |
| 108257253 | LOC108257253 | -1.47 | -0.85 | -1.40 | -1.53 | -1.17 |
| 108257596 | pigh         | 1.65  | 1.16  | 1.32  | 1.60  | 0.96  |
| 108278979 | LOC108278979 | -2.74 | -1.37 | -1.48 | -1.41 | -0.98 |
| 108257754 | pomc         | -1.64 | -0.69 | -1.61 | -1.42 | -1.16 |
| 108257798 | ralgps2      | 1.41  | 1.52  | 1.29  | 1.26  | 0.65  |
| 108257804 | LOC108257804 | 0.94  | 1.37  | 1.32  | 1.39  | 1.08  |
| 100528252 | ypel5        | 1.32  | 1.01  | 0.46  | 1.06  | 1.02  |
| 108257809 | LOC108257809 | 2.70  | 2.13  | 1.79  | 2.12  | 1.26  |
| 100304594 | mx1          | -1.51 | -1.41 | -0.75 | -1.41 | -2.37 |
| 108258366 | LOC108258366 | 1.22  | 0.56  | 2.01  | 1.63  | 1.44  |
| 108258367 | LOC108258367 | 1.19  | 0.80  | 2.20  | 1.18  | 1.46  |
| 108258904 | son          | -1.44 | -1.04 | -0.79 | -1.07 | -1.11 |
| 108258916 | ccdc81       | -0.78 | -1.35 | -1.22 | -1.48 | -1.41 |
| 108258860 | LOC108258860 | -2.02 | -1.95 | -1.43 | -0.81 | -2.04 |
| 108258614 | map2k7       | 1.89  | 1.77  | 1.77  | 1.64  | 0.99  |
| 108258996 | mcoln1       | 1.20  | 1.22  | 1.18  | 1.24  | 0.89  |

|           |              |       |       |       |       |       |
|-----------|--------------|-------|-------|-------|-------|-------|
| 108258949 | LOC108258949 | 1.22  | 0.91  | 2.06  | 3.73  | 5.33  |
| 108258444 | LOC108258444 | -2.90 | -1.28 | -2.41 | -1.42 | -0.12 |
| 108273966 | cnr1         | 1.59  | 1.04  | 0.79  | 1.37  | 1.81  |
| 108258806 | LOC108258806 | -0.39 | -1.13 | -1.57 | -1.55 | -1.60 |
| 108259590 | LOC108259590 | -1.38 | -1.79 | -0.74 | -1.83 | -1.13 |
| 108259233 | LOC108259233 | -2.13 | -2.38 | -1.13 | -1.07 | -0.37 |
| 108259353 | fto          | 1.21  | 1.29  | 1.20  | 1.20  | 0.88  |
| 108259666 | LOC108259666 | -1.08 | -1.42 | -0.82 | -1.47 | -1.26 |
| 108259230 | LOC108259230 | 0.98  | 1.36  | 1.39  | 1.63  | 1.40  |
| 108259533 | LOC108259533 | -2.32 | -1.56 | -0.76 | -1.77 | -1.24 |
| 108259435 | LOC108259435 | 1.03  | 1.27  | 0.95  | 1.76  | 1.33  |
| 108259856 | LOC108259856 | 1.84  | 1.41  | 0.56  | 1.00  | 1.37  |
| 108260095 | mink1        | 1.27  | 1.63  | 1.43  | 1.60  | 0.96  |
| 108260286 | LOC108260286 | -1.42 | -1.14 | -0.98 | -1.34 | -1.29 |
| 108259945 | btf3         | 1.59  | 1.26  | 1.18  | 0.88  | 1.21  |
| 108260319 | LOC108260319 | 1.67  | 1.01  | 1.84  | 2.19  | 2.86  |
| 108260321 | LOC108260321 | 1.03  | 0.94  | 1.17  | 1.06  | 1.96  |
| 108259878 | LOC108259878 | 1.29  | 1.35  | 1.16  | 0.90  | 1.07  |
| 108260180 | prdx4        | 2.34  | 1.73  | 1.31  | 1.45  | 0.95  |
| 108260924 | LOC108260924 | -1.02 | -1.37 | -0.69 | -1.35 | -2.60 |
| 108260822 | ptprd        | -1.27 | -1.09 | -1.02 | -1.06 | -0.70 |
| 108260759 | LOC108260759 | -1.20 | -0.19 | 1.81  | 2.05  | 1.01  |
| 108260656 | mab2112      | -1.88 | -1.37 | -1.23 | -1.36 | -0.96 |
| 108259059 | stx7         | 1.80  | 1.22  | 0.75  | 1.08  | 1.11  |
| 108261079 | LOC108261079 | -1.24 | -0.84 | -1.71 | -1.12 | -1.75 |
| 108261168 | LOC108261168 | 1.24  | 1.36  | 1.54  | 1.70  | 1.32  |
| 108261195 | LOC108261195 | -1.35 | -0.96 | -1.92 | -1.91 | -1.21 |
| 108261316 | LOC108261316 | 1.54  | 1.00  | 0.77  | 1.14  | 2.21  |
| 108261328 | LOC108261328 | -0.82 | -1.60 | -1.91 | -2.25 | -1.26 |
| 108261330 | LOC108261330 | 0.86  | 1.38  | 1.80  | 2.00  | 1.52  |
| 108261435 | LOC108261435 | 1.09  | 1.68  | 1.60  | 1.93  | 1.77  |
| 108261457 | LOC108261457 | -1.99 | -1.24 | -0.40 | -1.11 | -1.01 |
| 108261579 | LOC108261579 | -1.19 | -1.31 | -0.96 | -1.58 | -1.54 |
| 108261640 | LOC108261640 | 1.63  | 1.61  | 0.98  | 1.65  | 1.34  |
| 108261678 | LOC108261678 | 2.14  | 0.31  | 1.45  | 2.30  | 1.47  |
| 108261757 | LOC108261757 | 1.33  | 0.59  | 1.34  | 1.31  | 1.45  |
| 108255574 | hs3st5       | -1.44 | -1.99 | -0.74 | -2.42 | -1.21 |
| 108261789 | LOC108261789 | -3.33 | -2.77 | -4.23 | -1.09 | 0.70  |
| 108261821 | LOC108261821 | -1.44 | -1.04 | -0.88 | -3.22 | -1.44 |
| 108261918 | LOC108261918 | 2.23  | 1.86  | 3.82  | 2.47  | 2.91  |
| 108262028 | LOC108262028 | -1.53 | -1.53 | -0.54 | -1.03 | -2.19 |
| 108262030 | LOC108262030 | -1.26 | -1.10 | -0.99 | -1.92 | -1.98 |
| 108262031 | LOC108262031 | 0.88  | 1.33  | 1.04  | 1.17  | 1.00  |
| 108263797 | LOC108263797 | -0.84 | -1.20 | -1.53 | -1.42 | -1.15 |
| 108262209 | LOC108262209 | 2.62  | 2.34  | 2.02  | 2.97  | 1.15  |

|           |              |       |       |       |       |       |
|-----------|--------------|-------|-------|-------|-------|-------|
| 108262278 | LOC108262278 | 1.77  | 1.02  | 2.38  | 2.61  | 1.41  |
| 108262445 | LOC108262445 | 1.31  | 1.27  | 1.40  | 1.23  | 0.85  |
| 108262534 | LOC108262534 | 2.73  | 1.88  | 1.45  | 1.70  | 1.34  |
| 108262611 | LOC108262611 | -2.48 | -1.03 | -0.91 | -1.50 | -1.06 |
| 108262724 | LOC108262724 | -2.77 | -1.91 | -0.75 | -1.55 | -1.79 |
| 108263005 | LOC108263005 | -1.50 | -2.03 | -1.69 | -2.19 | -0.94 |
| 108263071 | LOC108263071 | -1.07 | -1.09 | -0.47 | -1.25 | -2.02 |
| 108262953 | tbck         | 1.12  | 1.18  | 0.64  | 1.27  | 1.14  |
| 108263850 | LOC108263850 | 1.70  | 1.11  | 0.63  | 1.26  | 1.27  |
| 108263461 | LOC108263461 | -0.80 | -1.33 | -1.56 | -2.61 | -1.36 |
| 108266414 | bcam         | 3.19  | 1.99  | 1.20  | 2.02  | 1.48  |
| 108263463 | LOC108263463 | 1.72  | 1.24  | 1.39  | 1.75  | 0.78  |
| 108263298 | LOC108263298 | 1.54  | 1.14  | 0.63  | 1.06  | 1.05  |
| 108263706 | qki          | 2.71  | 1.70  | 0.92  | 1.55  | 1.57  |
| 108263493 | LOC108263493 | -2.11 | -1.90 | -0.95 | -1.86 | -1.52 |
| 108262914 | LOC108262914 | 0.66  | 1.53  | 1.66  | 1.25  | 1.96  |
| 100528758 | cyt          | 2.44  | 1.73  | 0.81  | 1.17  | 1.15  |
| 108263091 | LOC108263091 | -1.00 | -1.77 | -1.15 | -1.48 | 0.47  |
| 108262927 | LOC108262927 | 2.09  | 1.38  | 0.98  | 1.34  | 1.07  |
| 108263236 | LOC108263236 | -1.95 | -1.30 | -0.99 | -1.28 | -1.83 |
| 108264845 | LOC108264845 | -1.37 | -1.07 | -1.32 | -1.07 | -0.16 |
| 108264709 | bckdha       | 1.88  | 1.40  | 1.08  | 1.61  | 0.92  |
| 108266148 | LOC108266148 | -0.83 | -1.37 | -1.01 | -1.30 | -1.57 |
| 108264382 | LOC108264382 | 2.36  | 1.88  | 0.81  | 1.85  | 2.12  |
| 108263980 | LOC108263980 | 0.99  | 1.59  | 1.43  | 1.86  | 2.30  |
| 108264443 | LOC108264443 | -1.28 | -1.50 | -0.82 | -1.18 | -1.01 |
| 108264373 | LOC108264373 | 1.19  | 1.15  | 1.22  | 1.35  | 0.80  |
| 108266341 | LOC108266341 | 1.28  | 1.15  | 0.98  | 1.50  | 1.10  |
| 108264416 | LOC108264416 | 1.44  | 1.59  | 1.61  | 1.62  | 0.98  |
| 108263933 | LOC108263933 | 1.43  | 1.70  | 1.48  | 1.56  | 0.77  |
| 108264679 | LOC108264679 | 1.42  | 1.13  | 1.37  | 1.16  | 0.76  |
| 108264090 | LOC108264090 | 1.77  | 1.89  | 1.71  | 2.15  | 2.02  |
| 108264390 | dyx1c1       | -1.09 | -0.71 | -1.00 | -1.44 | -1.54 |
| 108264534 | LOC108264534 | -1.23 | -0.49 | -2.51 | -2.14 | -1.72 |
| 108264923 | LOC108264923 | -1.25 | -0.03 | 1.64  | 2.42  | 1.81  |
| 108264930 | orai1        | 1.85  | 1.61  | 0.40  | 1.58  | 1.20  |
| 108265414 | tgoln2       | 1.43  | 1.20  | 0.90  | 1.47  | 1.13  |
| 100304482 | aplnr        | 1.37  | 1.23  | 0.78  | 1.58  | 1.18  |
| 100304470 | b2m          | 1.00  | 0.85  | 1.01  | 1.42  | 1.28  |
| 108265091 | stc1         | -1.41 | -1.43 | -1.41 | -1.13 | -0.91 |
| 108263767 | sox4         | 1.29  | 1.43  | 0.74  | 1.53  | 1.46  |
| 108265219 | LOC108265219 | -1.23 | -1.63 | -2.12 | -1.39 | -0.02 |
| 108265031 | kiaa2013     | 1.79  | 1.44  | 1.12  | 1.78  | 0.98  |
| 108265386 | LOC108265386 | 1.37  | 0.90  | 1.29  | 1.45  | 1.19  |
| 108266039 | ppic         | 2.83  | 1.81  | 0.83  | 1.33  | 1.18  |

|           |              |       |       |       |       |       |
|-----------|--------------|-------|-------|-------|-------|-------|
| 108265913 | ap3s1        | 1.60  | 1.15  | 0.75  | 1.26  | 1.07  |
| 108265006 | LOC108265006 | 1.18  | 1.37  | 0.72  | 1.63  | 1.50  |
| 108265013 | LOC108265013 | 1.02  | 0.99  | 1.29  | 1.24  | 1.08  |
| 108265725 | kiaa1324     | 1.09  | 1.23  | 0.68  | 1.31  | 1.82  |
| 108265784 | efhd2        | 1.88  | 1.39  | 0.99  | 1.13  | 1.19  |
| 108265432 | LOC108265432 | 1.17  | 1.07  | 0.97  | 1.29  | 1.03  |
| 108265187 | sema3b       | 2.84  | 1.45  | 0.40  | 1.59  | 1.42  |
| 108265911 | amt          | 2.57  | 1.96  | 1.58  | 1.16  | 0.36  |
| 108265277 | LOC108265277 | 1.63  | 1.01  | 1.07  | 1.72  | 0.81  |
| 108265841 | slc35a2      | 1.76  | 1.04  | 1.07  | 1.67  | 0.70  |
| 108265920 | soat1        | -0.70 | -1.19 | -1.33 | -1.16 | -1.19 |
| 108266720 | LOC108266720 | -0.89 | -1.12 | -1.71 | -1.01 | -1.30 |
| 108266516 | c6h2orf40    | 1.14  | 0.75  | 1.54  | 2.94  | 3.80  |
| 108266660 | klhl23       | -1.55 | -0.79 | -2.47 | -2.95 | -2.05 |
| 108266198 | marco        | -1.25 | -1.35 | -0.68 | -1.17 | -1.04 |
| 108266931 | LOC108266931 | -1.22 | -1.32 | -0.96 | -1.24 | -1.18 |
| 108266238 | LOC108266238 | -2.37 | -1.03 | -0.76 | -1.77 | -1.33 |
| 108266760 | LOC108266760 | 2.00  | 1.37  | 1.06  | 0.94  | 1.11  |
| 108266476 | abca12       | -1.03 | -0.94 | -1.15 | -1.81 | -1.25 |
| 108266109 | mstn         | 3.74  | 1.71  | 0.10  | 2.39  | 2.02  |
| 108266311 | LOC108266311 | -1.36 | -1.07 | -0.63 | -1.06 | -1.53 |
| 108266173 | col8a1       | 2.94  | 1.46  | 0.80  | 2.12  | 3.89  |
| 108266820 | slc5a3       | 1.68  | 1.43  | 1.89  | 1.47  | 0.88  |
| 108266073 | LOC108266073 | -1.19 | -1.30 | -0.54 | -1.60 | -2.59 |
| 108267382 | LOC108267382 | 2.37  | 1.66  | 1.47  | 1.50  | 0.93  |
| 100528281 | pfn2         | 2.06  | 1.59  | 0.54  | 1.12  | 1.11  |
| 108267646 | LOC108267646 | -1.17 | -0.65 | -1.06 | -1.73 | -1.48 |
| 108268345 | LOC108268345 | -0.94 | -1.38 | -1.09 | -1.44 | -1.89 |
| 100305060 | LOC100305060 | 1.25  | 1.41  | 0.65  | 1.35  | 1.28  |
| 108267571 | LOC108267571 | -1.94 | -1.20 | -0.98 | -1.47 | -1.49 |
| 108267671 | LOC108267671 | 1.68  | 1.25  | 1.17  | 1.00  | 0.93  |
| 108267836 | LOC108267836 | -1.80 | -1.13 | -0.48 | -1.13 | -1.63 |
| 108267602 | LOC108267602 | 1.03  | 1.08  | 1.04  | 1.22  | 0.77  |
| 108267669 | LOC108267669 | -1.50 | -1.16 | -0.66 | -1.06 | -1.44 |
| 108267543 | LOC108267543 | -1.65 | -1.86 | -0.67 | -1.17 | -2.58 |
| 108268328 | LOC108268328 | -1.32 | -1.13 | -0.66 | -1.45 | -1.57 |
| 108268978 | LOC108268978 | 1.49  | 1.31  | 1.10  | 1.33  | 0.80  |
| 108278034 | ccdc129      | -1.12 | -1.50 | -1.12 | -1.01 | -0.36 |
| 108268880 | slc25a53     | -1.28 | -0.76 | -1.11 | -2.62 | -1.85 |
| 108269387 | LOC108269387 | -0.84 | -1.46 | -1.72 | -1.93 | -1.89 |
| 108268447 | tnmd         | 3.83  | 1.94  | 0.23  | 1.85  | 2.23  |
| 108268802 | zbtb3        | 1.43  | 1.11  | 1.60  | 1.13  | 0.98  |
| 108268406 | fosl1        | -1.15 | 1.08  | -1.33 | -1.10 | 0.26  |
| 108268173 | LOC108268173 | 0.58  | 1.17  | 1.10  | 1.47  | 1.36  |
| 108269117 | LOC108269117 | 1.15  | 1.10  | 1.06  | 0.86  | 1.02  |

|           |              |       |       |       |       |       |
|-----------|--------------|-------|-------|-------|-------|-------|
| 108269259 | kitlg        | 1.14  | 1.33  | 1.41  | 1.28  | 0.96  |
| 108269222 | LOC108269222 | 1.68  | 1.19  | 1.13  | 1.12  | 0.87  |
| 108268926 | rnf130       | 0.92  | 1.21  | 1.21  | 1.86  | 1.47  |
| 108270458 | dicer1       | 0.76  | 1.08  | 1.37  | 1.29  | 1.32  |
| 108270487 | dio2         | -2.46 | -1.01 | -1.01 | -1.86 | -0.64 |
| 108269623 | LOC108269623 | 1.51  | 1.30  | 0.55  | 1.36  | 1.06  |
| 108270232 | asx12        | 1.07  | 1.09  | 1.11  | 1.28  | 0.76  |
| 108263920 | spidr        | -1.62 | -1.25 | -1.28 | -1.51 | -0.92 |
| 108270167 | spred1       | 1.38  | 1.29  | 0.86  | 1.81  | 1.48  |
| 108269954 | LOC108269954 | -0.85 | -1.45 | -1.66 | -1.50 | -1.36 |
| 108269833 | LOC108269833 | 1.16  | 1.62  | 2.26  | 1.99  | 2.65  |
| 108272542 | LOC108272542 | 3.50  | 2.62  | 2.55  | 3.08  | 1.51  |
| 108269700 | LOC108269700 | 1.98  | 1.74  | 1.35  | 1.75  | 1.23  |
| 108271241 | galnt18      | 2.09  | 1.61  | 1.44  | 1.45  | 1.14  |
| 108271242 | LOC108271242 | -3.35 | -2.72 | -1.65 | -3.26 | -2.82 |
| 108271080 | LOC108271080 | 2.48  | 2.21  | 1.96  | 2.01  | 2.00  |
| 108270627 | LOC108270627 | 2.15  | 1.95  | 1.81  | 1.70  | 1.40  |
| 108271000 | LOC108271000 | 1.98  | 1.46  | 1.07  | 1.25  | 1.10  |
| 108270966 | LOC108270966 | 2.95  | 2.18  | 2.56  | 2.16  | 1.65  |
| 108270530 | LOC108270530 | 1.32  | 1.14  | 1.13  | 1.61  | 2.29  |
| 108270775 | LOC108270775 | -1.21 | -1.43 | -1.00 | -1.27 | -1.01 |
| 108270781 | cdc6         | -1.39 | -1.25 | -1.41 | -1.65 | -1.17 |
| 108272222 | LOC108272222 | 1.73  | 1.80  | 1.93  | 1.96  | 1.69  |
| 108271612 | LOC108271612 | 1.90  | 1.90  | 2.13  | 2.05  | 1.66  |
| 108272099 | LOC108272099 | -1.30 | -1.41 | -1.07 | -1.62 | -1.57 |
| 108272651 | tubb1        | 1.45  | 1.71  | 1.56  | 1.99  | 1.46  |
| 108272963 | iqca1        | -1.58 | -1.24 | -1.07 | -1.28 | -1.05 |
| 108271700 | serpine3     | -1.62 | -1.12 | -1.02 | -1.36 | -1.54 |
| 108271695 | lrch1        | 1.31  | 1.63  | 1.36  | 1.31  | 1.04  |
| 108273137 | LOC108273137 | -2.16 | -1.72 | -1.04 | -1.29 | -2.01 |
| 108272885 | c1qtnf6      | 1.92  | 1.08  | 1.38  | 1.27  | 1.69  |
| 108272735 | LOC108272735 | 1.84  | 1.89  | 1.26  | 2.23  | 1.95  |
| 108256381 | LOC108256381 | -1.58 | -1.63 | -1.67 | -2.49 | -2.20 |
| 108273151 | epb41        | -1.50 | -1.50 | -1.33 | -1.56 | -1.29 |
| 108272891 | LOC108272891 | 2.03  | 1.81  | 1.34  | 1.63  | 1.64  |
| 108273161 | LOC108273161 | 1.60  | 1.79  | 1.40  | 1.68  | 1.43  |
| 108272959 | LOC108272959 | 1.57  | 1.35  | 1.14  | 1.45  | 1.26  |
| 108273355 | LOC108273355 | 2.09  | 1.77  | 1.06  | 1.88  | 1.72  |
| 108272839 | LOC108272839 | 1.57  | 1.49  | 1.50  | 2.19  | 1.41  |
| 108280346 | LOC108280346 | -1.42 | -1.29 | -1.85 | -1.32 | -1.04 |
| 108274258 | LOC108274258 | -2.15 | -1.46 | -2.18 | -2.23 | -2.25 |
| 108273731 | LOC108273731 | -1.99 | -1.66 | -1.73 | -1.93 | -1.52 |
| 108273987 | LOC108273987 | 1.31  | 1.43  | 1.21  | 1.71  | 1.39  |
| 108280673 | tbc1d17      | 1.55  | 1.59  | 1.39  | 1.51  | 1.46  |
| 108273997 | LOC108273997 | 1.90  | 1.35  | 1.01  | 1.50  | 1.01  |

|           |              |       |       |       |       |       |
|-----------|--------------|-------|-------|-------|-------|-------|
| 108274164 | bricd5       | -1.32 | -2.06 | -1.34 | -1.30 | -1.70 |
| 108274226 | LOC108274226 | -2.09 | -1.38 | -1.36 | -1.53 | -1.34 |
| 108273450 | LOC108273450 | -1.16 | -1.49 | -1.66 | -1.85 | -1.87 |
| 108273999 | ccser2       | 1.22  | 1.42  | 1.41  | 1.29  | 1.22  |
| 108274765 | LOC108274765 | 1.25  | 1.50  | 1.55  | 2.53  | 2.88  |
| 108275434 | atp8b4       | 1.59  | 2.10  | 2.24  | 1.99  | 1.79  |
| 108274970 | LOC108274970 | 1.83  | 1.71  | 1.39  | 1.62  | 1.23  |
| 108264405 | LOC108264405 | 1.76  | 1.04  | 1.46  | 1.74  | 1.20  |
| 108274634 | app12        | 1.43  | 1.31  | 1.17  | 1.21  | 1.02  |
| 108275933 | spryd3       | 1.35  | 1.39  | 1.14  | 1.49  | 1.02  |
| 108275868 | LOC108275868 | -1.34 | -1.64 | -1.44 | -1.71 | -1.06 |
| 108275850 | iyd          | 1.30  | 1.79  | 1.30  | 1.84  | 1.72  |
| 108272423 | dcakd        | 1.63  | 1.50  | 1.21  | 1.19  | 1.37  |
| 108276116 | ddah1        | 2.71  | 1.88  | 1.29  | 2.01  | 1.74  |
| 108275464 | mdp1         | 1.61  | 1.38  | 1.06  | 1.05  | 1.24  |
| 108275701 | atp1b2       | 1.74  | 1.27  | 1.30  | 1.16  | 1.11  |
| 108276229 | osbp12       | 2.11  | 1.58  | 1.35  | 1.82  | 1.44  |
| 108276093 | LOC108276093 | 2.98  | 1.90  | 1.36  | 1.17  | 1.15  |
| 108275878 | LOC108275878 | -1.60 | -1.55 | -1.47 | -1.80 | -1.29 |
| 108276181 | LOC108276181 | 1.27  | 1.27  | 1.39  | 1.66  | 1.02  |
| 108275784 | LOC108275784 | 2.43  | 2.02  | 1.27  | 1.69  | 1.34  |
| 108276176 | LOC108276176 | 1.89  | 2.71  | 2.60  | 2.62  | 2.83  |
| 108275951 | LOC108275951 | -1.68 | -1.28 | -1.04 | -1.70 | -1.91 |
| 108275874 | asb8         | 1.69  | 1.49  | 1.17  | 1.63  | 1.19  |
| 100528595 | ghc1         | 1.35  | 1.63  | 1.19  | 1.29  | 1.24  |
| 108276354 | LOC108276354 | 1.96  | 1.91  | 1.30  | 2.14  | 1.74  |
| 108276854 | itga2        | 1.80  | 1.87  | 1.31  | 1.66  | 1.14  |
| 108276563 | LOC108276563 | 1.11  | 1.12  | 1.03  | 1.87  | 4.00  |
| 108276890 | LOC108276890 | 1.57  | 1.37  | 1.17  | 1.48  | 1.05  |
| 108276947 | LOC108276947 | 1.06  | 1.40  | 1.60  | 1.48  | 1.10  |
| 108277362 | scarb1       | 1.60  | 1.57  | 1.51  | 1.14  | 1.33  |
| 100304696 | il1b         | -1.78 | -1.92 | -2.28 | -3.03 | -3.33 |
| 108277309 | LOC108277309 | 2.57  | 1.50  | 1.08  | 2.10  | 1.57  |
| 108276658 | ehbp111      | 1.54  | 1.39  | 1.57  | 1.63  | 1.53  |
| 108277534 | LOC108277534 | -1.67 | -1.94 | -1.14 | -1.46 | -2.40 |
| 108276912 | LOC108276912 | -2.19 | -1.45 | -1.17 | -1.70 | -1.33 |
| 108278013 | LOC108278013 | 1.56  | 1.43  | 1.43  | 1.72  | 1.49  |
| 108259902 | dxo          | 2.70  | 2.33  | 1.64  | 1.78  | 1.38  |
| 108277422 | unc119       | 1.82  | 1.19  | 1.10  | 1.42  | 1.23  |
| 100528547 | tlcd2        | 1.09  | 1.12  | 1.29  | 1.82  | 1.68  |
| 108278002 | LOC108278002 | 1.24  | 2.03  | 1.58  | 2.27  | 2.03  |
| 108279160 | LOC108279160 | -2.98 | -2.18 | -1.57 | -1.62 | -1.15 |
| 108278883 | LOC108278883 | -2.08 | -1.14 | -1.17 | -1.68 | -1.78 |
| 108279343 | LOC108279343 | 2.21  | 1.75  | 1.02  | 1.64  | 1.49  |
| 108279038 | LOC108279038 | -2.00 | -1.50 | -1.22 | -1.29 | -2.07 |

|           |              |       |       |       |       |       |
|-----------|--------------|-------|-------|-------|-------|-------|
| 108279233 | LOC108279233 | 2.58  | 1.91  | 1.38  | 1.58  | 1.27  |
| 108279377 | chrdl2       | -1.19 | -1.46 | -1.69 | -1.42 | -1.40 |
| 108278798 | nr3c1        | 1.43  | 1.19  | 1.65  | 1.67  | 1.17  |
| 100528354 | ndfip1       | 2.47  | 1.86  | 1.41  | 1.90  | 1.78  |
| 108280126 | LOC108280126 | 1.27  | 1.21  | 1.15  | 1.34  | 1.28  |
| 108277048 | LOC108277048 | -1.91 | -1.40 | -1.01 | -1.95 | -1.94 |
| 108274461 | LOC108274461 | 1.77  | 1.75  | 1.45  | 1.76  | 1.38  |
| 108280377 | LOC108280377 | 1.02  | 1.58  | 1.33  | 1.89  | 1.83  |
| 108280580 | rala         | 1.66  | 1.46  | 1.13  | 1.82  | 1.58  |
| 108280892 | LOC108280892 | 1.18  | 1.70  | 1.47  | 2.63  | 1.87  |
| 108280901 | LOC108280901 | 2.09  | 1.56  | 2.11  | 1.79  | 1.60  |
| 108280594 | ppm1l        | 2.29  | 2.00  | 1.78  | 1.27  | 1.39  |
| 108276293 | nacc1        | 2.03  | 2.31  | 1.62  | 1.72  | 1.60  |
| 100528891 | psph         | 2.53  | 2.59  | 3.06  | 3.27  | 1.79  |
| 108280760 | klhl24       | 1.61  | 1.12  | 1.32  | 1.84  | 1.02  |
| 108280211 | LOC108280211 | 1.54  | 1.79  | 1.48  | 1.57  | 1.30  |
| 100304492 | itgb1        | 2.52  | 1.83  | 1.24  | 1.70  | 1.30  |
| 108276513 | LOC108276513 | 3.26  | 1.80  | 1.37  | 2.06  | 2.33  |
| 108280454 | LOC108280454 | 1.21  | 1.41  | 1.74  | 1.50  | 1.16  |
| 108280743 | LOC108280743 | 2.33  | 1.66  | 1.90  | 2.01  | 2.00  |
| 108255099 | syp12        | 2.46  | 1.92  | 1.52  | 2.00  | 1.71  |
| 108256336 | LOC108256336 | 2.32  | 1.75  | 1.10  | 1.81  | 1.90  |
| 108254918 | foxp4        | -1.28 | -1.35 | -1.23 | -1.79 | -1.68 |
| 108255000 | LOC108255000 | 1.79  | 1.37  | 1.31  | 1.50  | 1.05  |
| 108254737 | LOC108254737 | 3.86  | 1.92  | 2.92  | 3.38  | 3.87  |
| 108254753 | LOC108254753 | -1.82 | -1.31 | -1.52 | -2.45 | -1.25 |
| 108254754 | LOC108254754 | -2.78 | -1.21 | -1.93 | -2.78 | -1.95 |
| 108254975 | hdac11       | 1.99  | 2.33  | 1.55  | 1.70  | 1.52  |
| 108255133 | foxj3        | 1.83  | 2.00  | 1.67  | 2.08  | 1.59  |
| 108255239 | LOC108255239 | 2.58  | 2.17  | 1.52  | 1.62  | 1.13  |
| 108255466 | ap1b1        | 1.64  | 1.60  | 1.21  | 1.69  | 1.22  |
| 108255852 | LOC108255852 | -1.25 | -1.46 | -1.21 | -1.25 | -1.15 |
| 108255895 | tesc         | 1.36  | 1.34  | 1.13  | 1.04  | 1.20  |
| 108255789 | LOC108255789 | 1.47  | 1.40  | 1.58  | 1.11  | 1.82  |
| 100528383 | mob1b        | 2.04  | 1.78  | 1.14  | 1.83  | 1.29  |
| 100528384 | f16p1        | 2.11  | 1.65  | 1.43  | 1.45  | 1.17  |
| 108256055 | LOC108256055 | 3.69  | 1.82  | 2.25  | 2.21  | 3.07  |
| 108255926 | LOC108255926 | 1.40  | 1.70  | 1.22  | 1.19  | 1.42  |
| 108255658 | cntrl        | 1.44  | 1.49  | 1.36  | 1.32  | 1.17  |
| 108255763 | LOC108255763 | 1.28  | 1.35  | 1.50  | 1.30  | 1.19  |
| 108255531 | LOC108255531 | 1.80  | 1.71  | 1.78  | 1.49  | 1.63  |
| 108256026 | carnmt1      | 1.57  | 1.53  | 1.55  | 1.79  | 1.17  |
| 108255577 | LOC108255577 | 1.71  | 1.62  | 1.78  | 1.33  | 1.09  |
| 108255575 | LOC108255575 | 2.02  | 1.33  | 1.00  | 3.19  | 1.62  |
| 108255567 | LOC108255567 | 1.38  | 1.07  | 1.19  | 1.99  | 1.23  |

|           |              |       |       |       |       |       |
|-----------|--------------|-------|-------|-------|-------|-------|
| 108255436 | LOC108255436 | 1.49  | 1.30  | 1.24  | 2.23  | 1.53  |
| 108256526 | polr1d       | 1.92  | 1.26  | 1.18  | 1.64  | 1.11  |
| 108256569 | LOC108256569 | 1.28  | 1.36  | 1.41  | 1.63  | 1.32  |
| 108256314 | LOC108256314 | 1.60  | 1.30  | 1.19  | 1.83  | 1.73  |
| 108256674 | LOC108256674 | 1.76  | 1.98  | 1.66  | 1.81  | 1.94  |
| 108256399 | LOC108256399 | -1.27 | -1.44 | -1.02 | -1.46 | -2.22 |
| 108256587 | LOC108256587 | 2.13  | 2.28  | 2.07  | 2.91  | 3.05  |
| 108256110 | cep72        | -1.15 | -1.14 | -1.14 | -1.26 | -1.23 |
| 108256344 | LOC108256344 | 1.10  | 1.17  | 1.23  | 1.52  | 1.09  |
| 108256266 | LOC108256266 | -1.14 | -1.04 | 2.52  | -1.64 | -1.79 |
| 100529002 | hba          | 2.29  | 1.76  | 1.22  | 1.44  | 2.38  |
| 108257036 | LOC108257036 | 2.97  | 2.42  | 1.80  | 2.05  | 2.14  |
| 108257041 | LOC108257041 | 2.07  | 1.86  | 1.81  | 1.71  | 2.22  |
| 100304620 | LOC100304620 | 2.47  | 1.96  | 1.58  | 1.86  | 1.80  |
| 108257040 | LOC108257040 | 2.17  | 1.60  | 1.28  | 1.41  | 2.43  |
| 108257038 | LOC108257038 | 2.69  | 1.80  | 1.33  | 1.67  | 2.58  |
| 108257380 | chst12       | 1.34  | 1.17  | 1.02  | 1.49  | 1.01  |
| 108257346 | gpr146       | 2.24  | 1.20  | 1.45  | 2.05  | 1.42  |
| 108256934 | laptm4b      | 1.50  | 1.25  | 1.33  | 1.39  | 1.27  |
| 108256920 | ggct         | 1.61  | 1.40  | 1.45  | 1.83  | 1.26  |
| 108256880 | LOC108256880 | 1.14  | 1.21  | 1.15  | 1.20  | 1.07  |
| 108257370 | LOC108257370 | 2.00  | 1.81  | 1.62  | 1.80  | 1.23  |
| 108256831 | LOC108256831 | -1.23 | -1.06 | -1.24 | -1.35 | -1.61 |
| 108257049 | LOC108257049 | 3.96  | 2.52  | 2.61  | 3.30  | 3.63  |
| 108257047 | LOC108257047 | 4.06  | 2.72  | 3.34  | 4.05  | 4.69  |
| 108257254 | LOC108257254 | 1.39  | 1.55  | 2.01  | 2.65  | 2.33  |
| 108275204 | tnrc6a       | 1.30  | 1.25  | 1.34  | 1.58  | 1.14  |
| 108257692 | LOC108257692 | 1.80  | 2.03  | 1.29  | 2.25  | 1.45  |
| 108257671 | LOC108257671 | 1.17  | 1.20  | 2.66  | 3.04  | 2.33  |
| 108257861 | LOC108257861 | -1.48 | -1.23 | -1.29 | -1.13 | -1.46 |
| 108257890 | rnf217       | 2.01  | 1.84  | 1.49  | 1.83  | 1.20  |
| 108257731 | LOC108257731 | 1.26  | 1.57  | 1.92  | 1.61  | 1.88  |
| 108257874 | atraid       | 2.23  | 1.50  | 1.37  | 1.41  | 1.35  |
| 108258095 | LOC108258095 | -2.43 | -2.19 | -1.59 | -1.60 | -1.74 |
| 108258183 | LOC108258183 | -1.98 | -1.43 | -1.52 | -1.38 | -2.01 |
| 108258550 | fn1          | 1.40  | 2.45  | 3.21  | 1.82  | 2.80  |
| 108258376 | LOC108258376 | 3.65  | 2.28  | 3.81  | 2.56  | 1.98  |
| 108259089 | LOC108259089 | -1.82 | -1.82 | -1.49 | -1.23 | -1.77 |
| 108258298 | LOC108258298 | 2.51  | 1.34  | 1.15  | 1.97  | 2.24  |
| 108258530 | LOC108258530 | 1.99  | 1.96  | 1.22  | 1.59  | 1.31  |
| 108258794 | LOC108258794 | 1.37  | 1.37  | 1.56  | 3.46  | 3.36  |
| 108258793 | mvb12a       | 1.77  | 1.81  | 1.16  | 1.59  | 1.55  |
| 108259224 | cmtm4        | 1.89  | 1.77  | 1.49  | 2.36  | 1.46  |
| 108259637 | hsd11b2      | -1.05 | -1.11 | -1.27 | -1.79 | -1.19 |
| 100528796 | ts101        | 1.65  | 1.44  | 1.12  | 1.52  | 1.18  |



|           |              |       |       |       |       |       |
|-----------|--------------|-------|-------|-------|-------|-------|
| 108259215 | mdk          | 1.26  | 1.25  | 1.43  | 1.45  | 1.45  |
| 108259823 | LOC108259823 | 1.44  | 1.13  | 1.46  | 1.49  | 1.34  |
| 108259833 | LOC108259833 | -2.66 | -1.64 | -1.80 | -1.83 | -1.71 |
| 108259733 | LOC108259733 | -3.60 | -2.34 | -2.76 | -2.25 | -1.71 |
| 108259960 | gng10        | 1.33  | 1.26  | 1.49  | 2.00  | 2.86  |
| 108259979 | LOC108259979 | -1.08 | -1.78 | -2.01 | -2.09 | -2.05 |
| 108260366 | LOC108260366 | 1.69  | 1.51  | 1.39  | 1.98  | 1.51  |
| 108260208 | LOC108260208 | -1.82 | -1.29 | -1.04 | -1.62 | -1.10 |
| 108260707 | LOC108260707 | 1.70  | 1.72  | 1.67  | 1.58  | 1.06  |
| 108260795 | rbm47        | -1.71 | -1.45 | -1.06 | -1.30 | -1.30 |
| 108261062 | LOC108261062 | 1.30  | 1.77  | 1.33  | 1.47  | 1.51  |
| 108261147 | LOC108261147 | -1.26 | -1.43 | -1.52 | -1.70 | -1.99 |
| 108261150 | slc29a3      | 1.56  | 1.22  | 1.04  | 1.34  | 1.15  |
| 108265132 | c1h8orf59    | 1.64  | 1.60  | 1.23  | 1.30  | 1.08  |
| 108261376 | LOC108261376 | 1.59  | 1.11  | 1.45  | 1.72  | 1.67  |
| 108261504 | LOC108261504 | -1.66 | -4.46 | -1.16 | -1.52 | -1.32 |
| 108261526 | LOC108261526 | 2.12  | 1.44  | 1.28  | 1.58  | 1.30  |
| 108261653 | LOC108261653 | 1.04  | 1.21  | 2.12  | 4.23  | 3.03  |
| 108261670 | LOC108261670 | 1.51  | 1.85  | 2.70  | 4.46  | 3.95  |
| 108261774 | LOC108261774 | 3.72  | 2.69  | 1.52  | 4.92  | 2.99  |
| 108261867 | LOC108261867 | 1.25  | 1.17  | 1.29  | 1.63  | 1.20  |
| 108261889 | LOC108261889 | 3.09  | 2.36  | 2.66  | 2.98  | 2.66  |
| 108262226 | LOC108262226 | -1.67 | -1.32 | -1.31 | -2.05 | -2.36 |
| 108262879 | LOC108262879 | 2.46  | 1.15  | 2.42  | 2.44  | 2.76  |
| 108269094 | LOC108269094 | -1.84 | -2.21 | -1.68 | -2.11 | -3.16 |
| 108263115 | rnf150       | 1.61  | 1.91  | 1.53  | 1.66  | 1.19  |
| 108262465 | LOC108262465 | 1.79  | 1.50  | 1.47  | 1.40  | 1.62  |
| 100528095 | mtg1         | 1.89  | 1.62  | 1.42  | 2.01  | 1.70  |
| 108263121 | LOC108263121 | -1.43 | -1.40 | -1.85 | -1.83 | -1.20 |
| 108263354 | LOC108263354 | -2.53 | -1.43 | -1.69 | -2.05 | -1.27 |
| 108258710 | LOC108258710 | 2.60  | 2.97  | 2.39  | 4.66  | 5.24  |
| 108263034 | pla2g12b     | -2.25 | -2.68 | -1.57 | -1.84 | -1.77 |
| 108263837 | mdga1        | -1.88 | -1.08 | -1.80 | -2.03 | -1.84 |
| 108263620 | arg2         | -1.54 | -1.00 | -1.25 | -1.22 | -1.03 |
| 108263073 | pcnx1        | 2.01  | 2.06  | 2.29  | 2.41  | 2.03  |
| 108264745 | LOC108264745 | 3.07  | 2.75  | 3.75  | 2.77  | 4.45  |
| 108264746 | LOC108264746 | 4.49  | 3.20  | 3.72  | 3.88  | 4.10  |
| 108264540 | sipa1l3      | 1.46  | 1.70  | 1.60  | 2.16  | 1.45  |
| 108264825 | LOC108264825 | 2.30  | 2.09  | 1.70  | 2.05  | 1.78  |
| 108266091 | znf687       | 1.63  | 1.39  | 1.38  | 1.53  | 1.32  |
| 108264469 | LOC108264469 | -1.27 | -1.58 | -1.20 | -1.64 | -1.04 |
| 108266229 | ddr1         | 1.99  | 2.22  | 1.78  | 1.97  | 1.57  |
| 108264434 | LOC108264434 | 1.45  | 1.93  | 1.56  | 1.20  | 1.15  |
| 108264012 | ddx6         | 1.46  | 1.51  | 1.36  | 1.52  | 1.22  |
| 108264024 | LOC108264024 | -2.33 | -1.65 | -1.29 | -1.30 | -1.18 |

|           |              |       |       |       |       |       |
|-----------|--------------|-------|-------|-------|-------|-------|
| 108264305 | foxa3        | 1.05  | 1.29  | 1.02  | 1.34  | 1.42  |
| 108264343 | LOC108264343 | 1.03  | 1.39  | 1.32  | 1.72  | 1.10  |
| 100528462 | tmem170a     | 2.64  | 2.32  | 1.99  | 2.80  | 2.20  |
| 108264708 | cbfb         | 1.47  | 1.42  | 1.16  | 1.48  | 1.23  |
| 108264799 | LOC108264799 | -1.42 | -1.61 | -1.41 | -1.96 | -1.23 |
| 108264692 | LOC108264692 | 1.20  | 1.36  | 1.51  | 1.43  | 1.41  |
| 108264319 | lsm14a       | 1.69  | 1.31  | 1.20  | 1.74  | 1.27  |
| 108264582 | LOC108264582 | -1.38 | -1.25 | -1.06 | -1.83 | -1.01 |
| 108264140 | LOC108264140 | -1.94 | -1.70 | -1.58 | -1.60 | -1.68 |
| 108264477 | LOC108264477 | 1.38  | 1.22  | 1.36  | 1.64  | 1.08  |
| 108264495 | LOC108264495 | 1.56  | 1.33  | 1.16  | 1.38  | 1.15  |
| 108266641 | leng8        | 1.77  | 1.70  | 1.65  | 1.85  | 1.49  |
| 108264920 | LOC108264920 | 2.18  | 1.81  | 1.60  | 1.14  | 1.04  |
| 108264922 | mlec         | 2.14  | 1.56  | 1.50  | 1.86  | 1.29  |
| 108265534 | LOC108265534 | -3.00 | -1.23 | -1.48 | -2.39 | -1.85 |
| 108265239 | LOC108265239 | 2.25  | 1.91  | 2.24  | 2.08  | 1.56  |
| 108265905 | ptch1        | 1.70  | 1.76  | 1.80  | 1.76  | 1.43  |
| 108265661 | LOC108265661 | -1.76 | -1.29 | -1.10 | -1.59 | -1.08 |
| 108265730 | LOC108265730 | -1.04 | -1.56 | -1.78 | -1.29 | -1.20 |
| 108265738 | LOC108265738 | 2.15  | 1.46  | 1.23  | 1.51  | 2.19  |
| 108272313 | LOC108272313 | -1.52 | -1.32 | -1.31 | -1.17 | -1.51 |
| 108266730 | LOC108266730 | 4.41  | 3.07  | 3.13  | 3.49  | 4.02  |
| 108266938 | LOC108266938 | 2.23  | 1.82  | 2.93  | 2.22  | 3.30  |
| 108266812 | LOC108266812 | 1.28  | 1.44  | 1.74  | 1.17  | 1.80  |
| 108266166 | LOC108266166 | -1.89 | -1.67 | -1.69 | -1.22 | -1.05 |
| 100528816 | insig2       | 2.25  | 1.72  | 1.34  | 2.13  | 1.71  |
| 108267550 | dennd4b      | 1.08  | 1.30  | 1.49  | 1.58  | 1.24  |
| 108266635 | tnfsf11      | 1.11  | 1.04  | 1.37  | 1.51  | 1.35  |
| 108266637 | akap11       | 2.08  | 2.20  | 2.04  | 2.09  | 1.88  |
| 108266958 | shox         | 2.48  | 1.39  | 1.28  | 1.30  | 1.66  |
| 108266765 | LOC108266765 | 2.64  | 2.35  | 2.38  | 2.76  | 1.81  |
| 108266929 | ube2e3       | 1.65  | 1.38  | 1.50  | 1.37  | 1.08  |
| 108266134 | fkbp7        | 2.47  | 1.44  | 1.47  | 1.34  | 1.32  |
| 108266356 | srpx         | 1.57  | 2.64  | 1.93  | 1.85  | 2.10  |
| 108267381 | atp6v0b      | 2.14  | 1.68  | 1.22  | 1.75  | 1.39  |
| 108267402 | LOC108267402 | 2.58  | 1.74  | 1.38  | 1.60  | 1.12  |
| 108268290 | stard3nl     | 1.80  | 1.49  | 1.49  | 1.66  | 1.24  |
| 108267116 | ccdc39       | -1.77 | -1.31 | -1.06 | -1.27 | -1.05 |
| 108267775 | tsc22d2      | 1.50  | 1.53  | 1.39  | 1.56  | 1.22  |
| 100528542 | leprot       | 2.55  | 2.00  | 1.65  | 2.27  | 1.74  |
| 108268320 | LOC108268320 | 2.38  | 1.76  | 2.22  | 2.39  | 1.39  |
| 108267427 | ankrd46      | 2.04  | 2.03  | 1.09  | 1.16  | 1.35  |
| 100528742 | t179b        | 2.44  | 1.84  | 1.44  | 2.03  | 1.45  |
| 108267744 | LOC108267744 | 1.88  | 1.33  | 1.51  | 1.13  | 2.57  |
| 108268278 | LOC108268278 | 2.17  | 1.72  | 1.12  | 1.52  | 1.06  |

|           |              |       |       |       |       |       |
|-----------|--------------|-------|-------|-------|-------|-------|
| 108269074 | cpne3        | 1.72  | 1.69  | 1.33  | 1.86  | 1.31  |
| 108267705 | tbc1d14      | 1.61  | 1.48  | 1.46  | 1.39  | 1.06  |
| 108269297 | LOC108269297 | 3.83  | 4.58  | 5.20  | 4.84  | 4.27  |
| 108268512 | LOC108268512 | 1.23  | 2.00  | 2.46  | 1.73  | 1.88  |
| 108268648 | fanca        | -1.14 | -1.09 | -1.08 | -1.35 | -1.10 |
| 108269373 | LOC108269373 | -1.71 | -1.62 | -1.93 | -1.74 | -1.53 |
| 108269388 | LOC108269388 | -1.18 | -1.75 | -1.62 | -1.99 | -1.90 |
| 108269192 | zbtb33       | 2.36  | 1.62  | 2.13  | 2.33  | 1.14  |
| 108268888 | pdzd11       | 1.76  | 1.55  | 1.35  | 1.90  | 1.35  |
| 108268852 | slc7a2       | 1.17  | 1.92  | 1.79  | 1.52  | 1.48  |
| 108269248 | sh3gl3       | 1.34  | 1.22  | 1.69  | 1.88  | 2.02  |
| 108269072 | bpgm         | 2.85  | 2.11  | 1.94  | 1.98  | 1.40  |
| 108269118 | LOC108269118 | 1.69  | 1.58  | 1.29  | 1.07  | 1.21  |
| 108269321 | olfml1       | 2.71  | 2.01  | 1.54  | 1.75  | 1.28  |
| 108269401 | clcf1        | 1.36  | 1.35  | 1.09  | 1.37  | 1.43  |
| 108269220 | LOC108269220 | -1.35 | -1.10 | -1.35 | -1.36 | -1.02 |
| 108269991 | ism2         | -1.84 | -1.15 | -1.19 | -1.22 | -1.44 |
| 108269983 | LOC108269983 | -1.79 | -1.50 | -1.32 | -2.45 | -1.91 |
| 108270461 | dpysl5       | 2.20  | 1.95  | 1.80  | 2.10  | 2.32  |
| 100528443 | rab10        | 2.30  | 1.74  | 1.03  | 1.94  | 1.79  |
| 108270031 | LOC108270031 | 1.72  | 1.53  | 1.65  | 1.82  | 2.48  |
| 108270335 | pgrmc2       | 2.04  | 1.77  | 1.26  | 1.87  | 1.27  |

---
